# Supplementary material
Source: bioRxiv or medRxiv preprint supplement (https://www.biorxiv.org/highwire/filestream/53728/field_highwire_adjunct_files/12/178806-8.pdf)

## Supplementary Figure S8

Each of the subsequent pages shows a PheWAS plot for each one of the 78 SNPs with unique rsIDs in Supplementary Table S2. The association ( $-\log_{10}$  p-value on the y-axis) for the SNP is shown with each of the 3,144 IDPs. The IDPs are arranged on the x-axis in the three panels : (top) Structural MRI IDPs, (middle) Structural connectivity/micro-structure dMRI IDPs, (bottom) functional MRI IDPs. Points are coloured to delineate subgroups of IDPs and detailed in the legends. Summary details of each SNP are given in the top right box. The grey line shows the Bonferroni multiple testing threshold of 4.8.

### Structural MRI

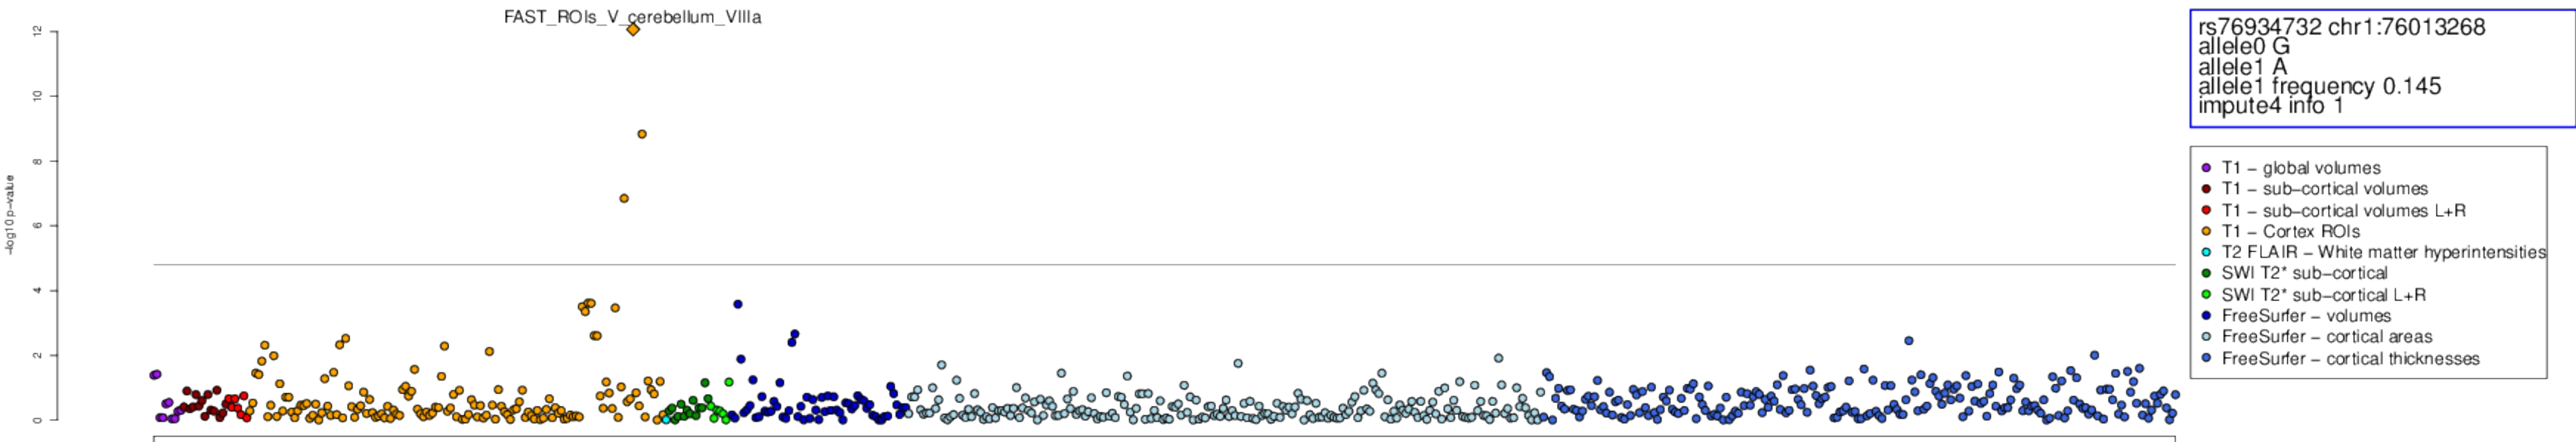

### Structural connectivity (Diffusion MRI)

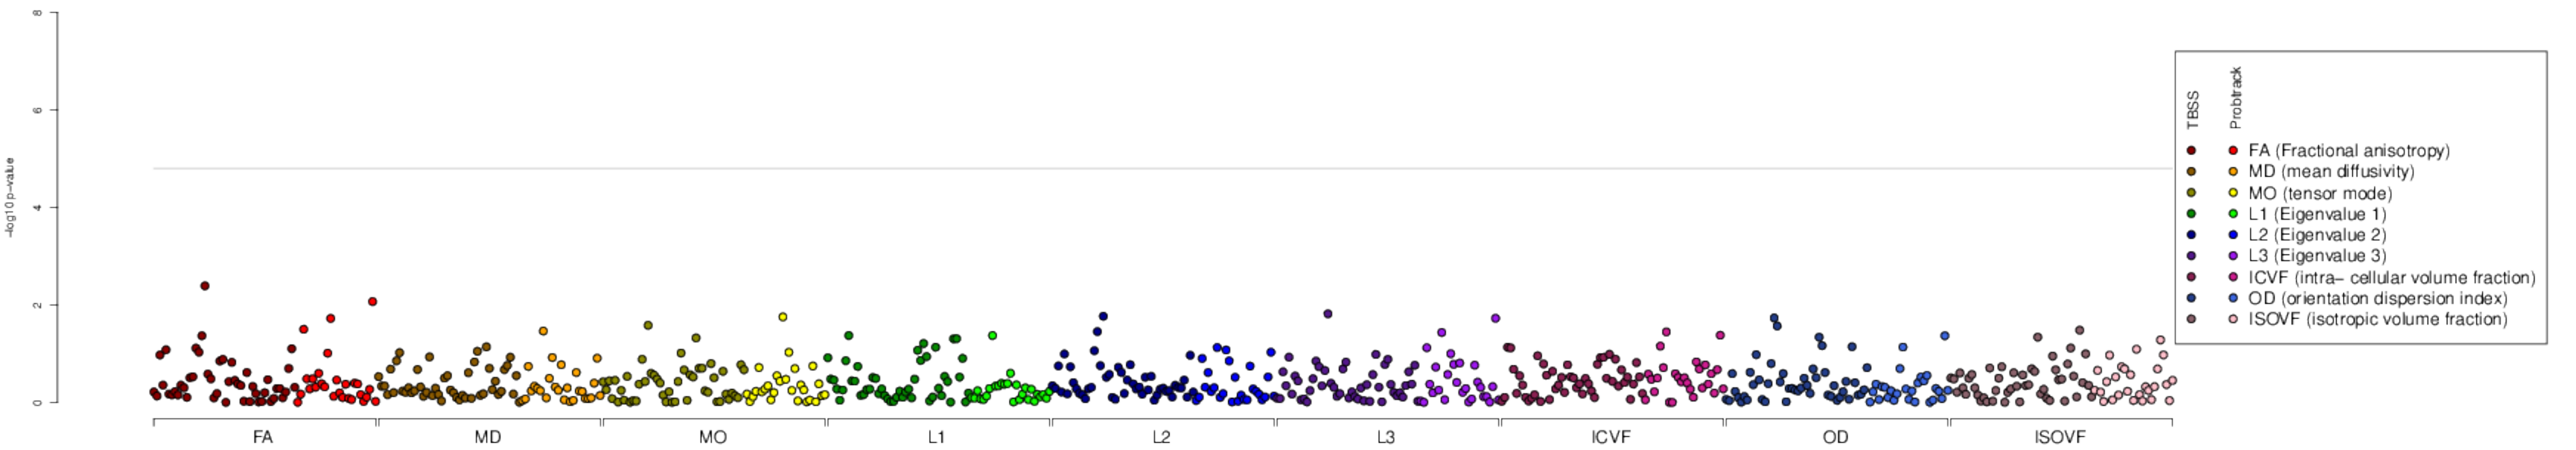

### functional MRI

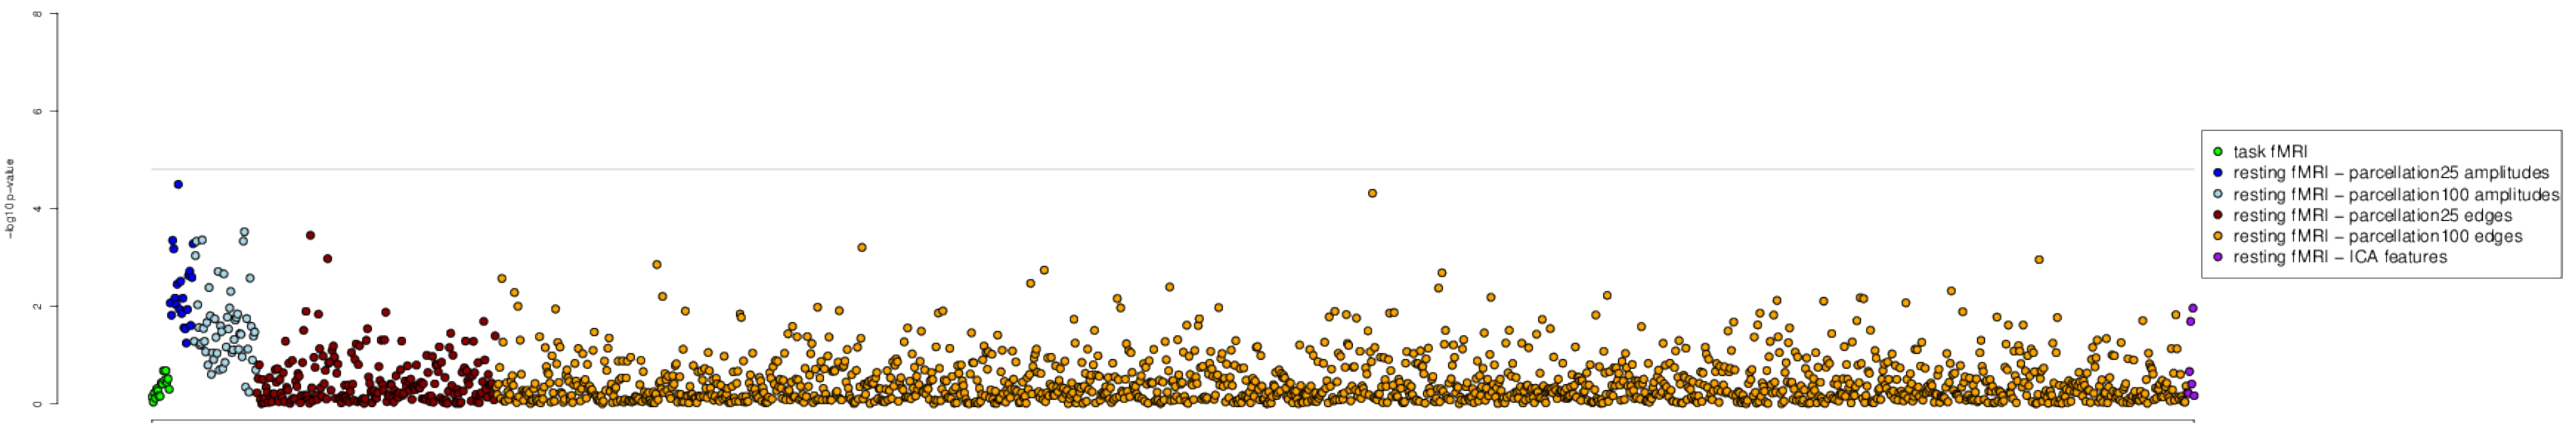

### Structural MRI

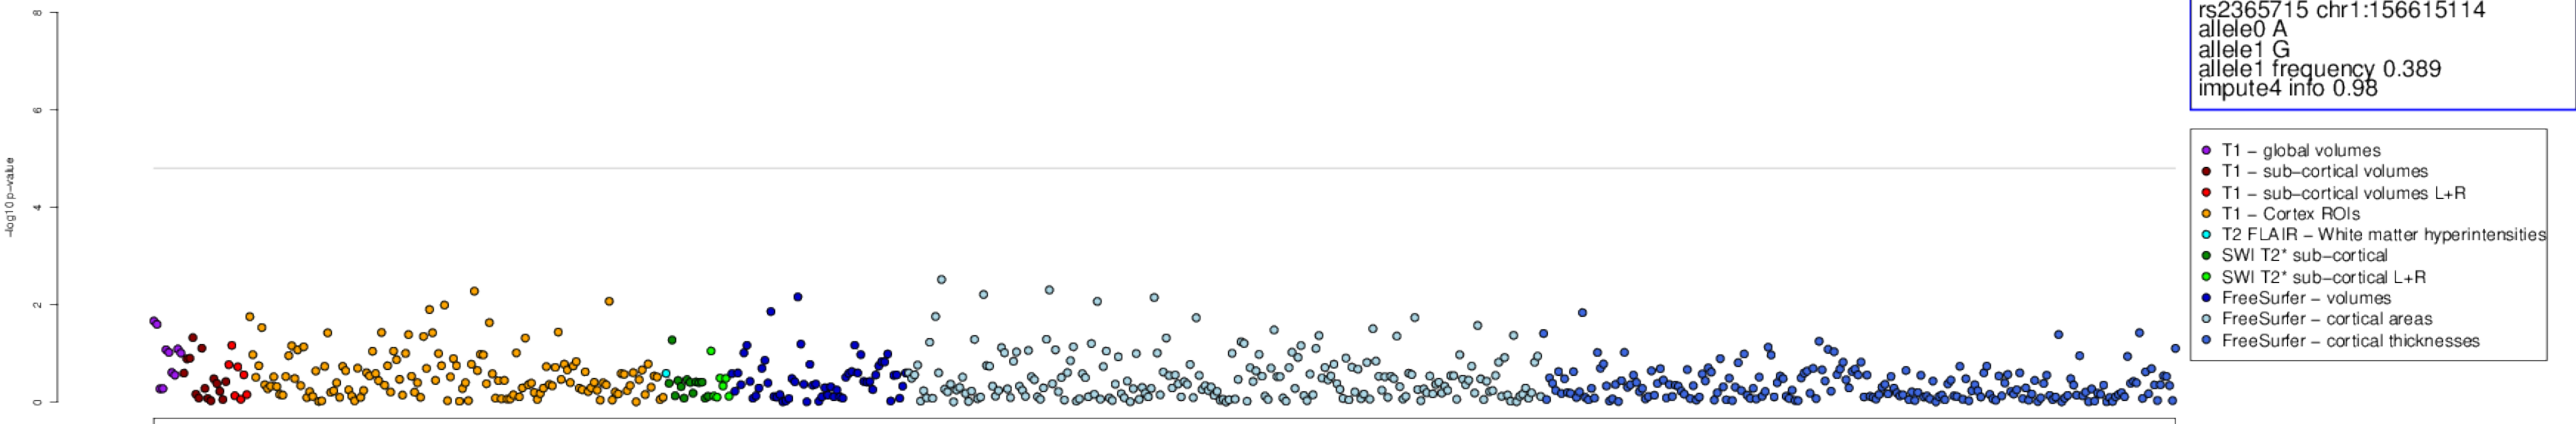

### Structural connectivity (Diffusion MRI)

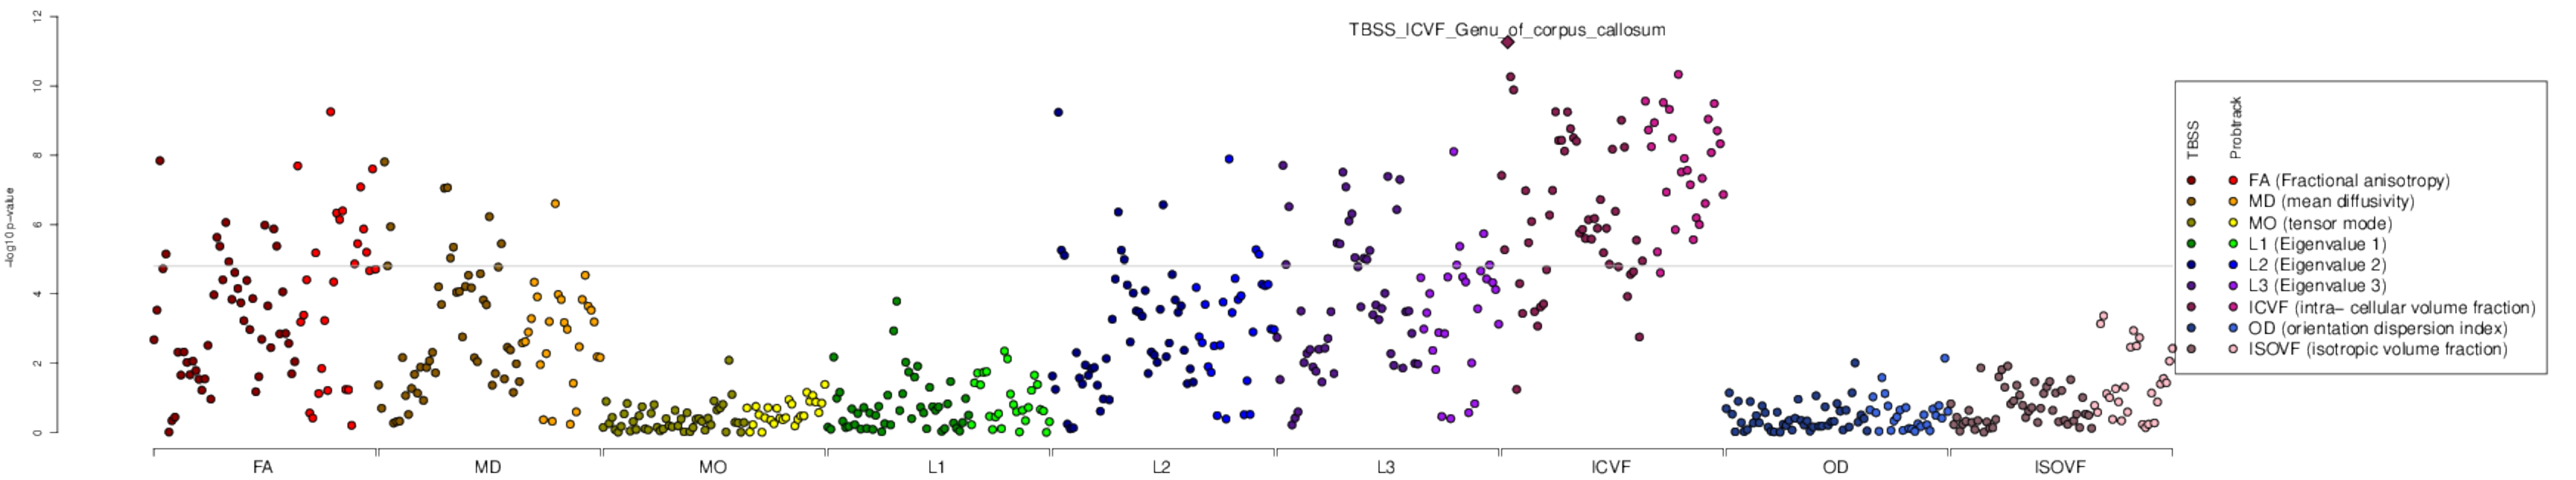

### functional MRI

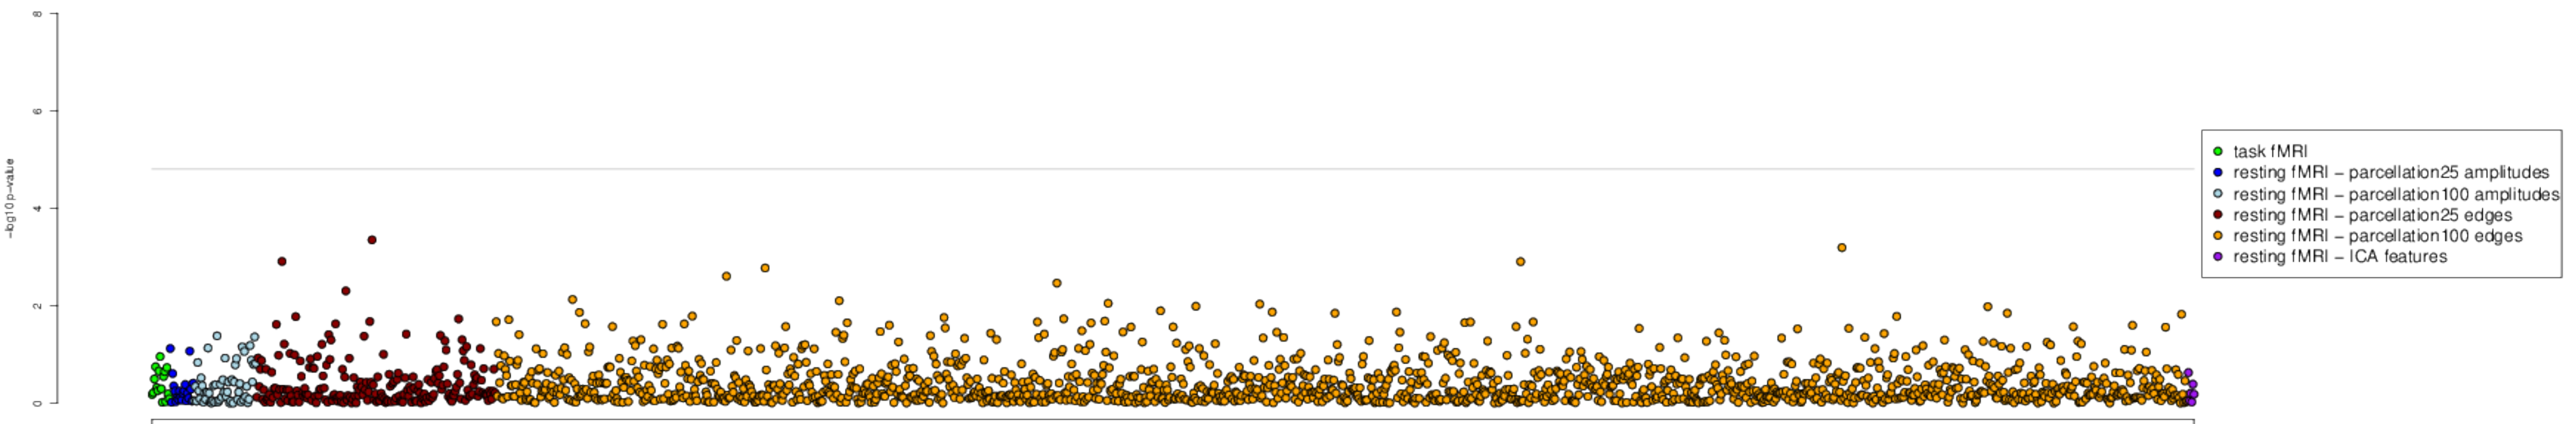

### Structural MRI

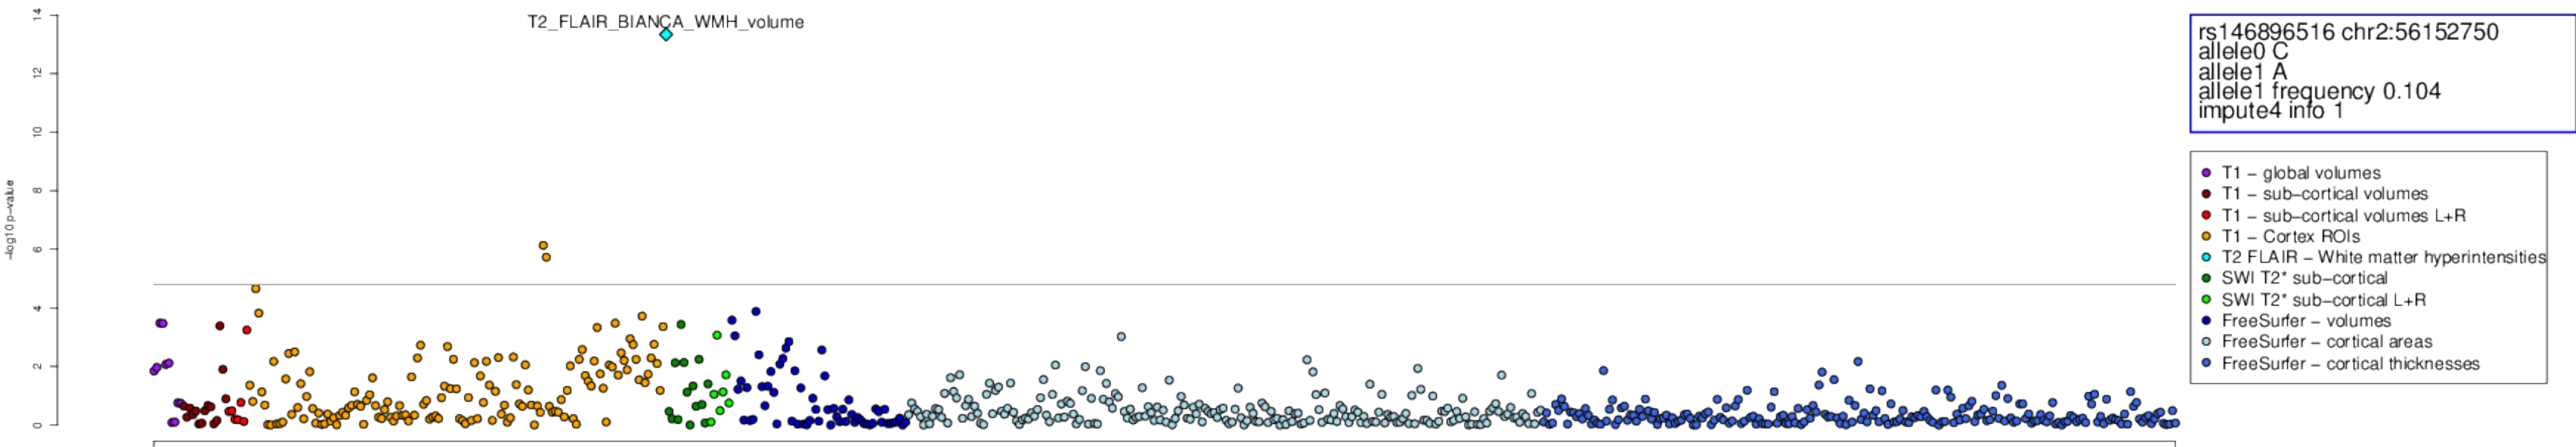

### Structural connectivity (Diffusion MRI)

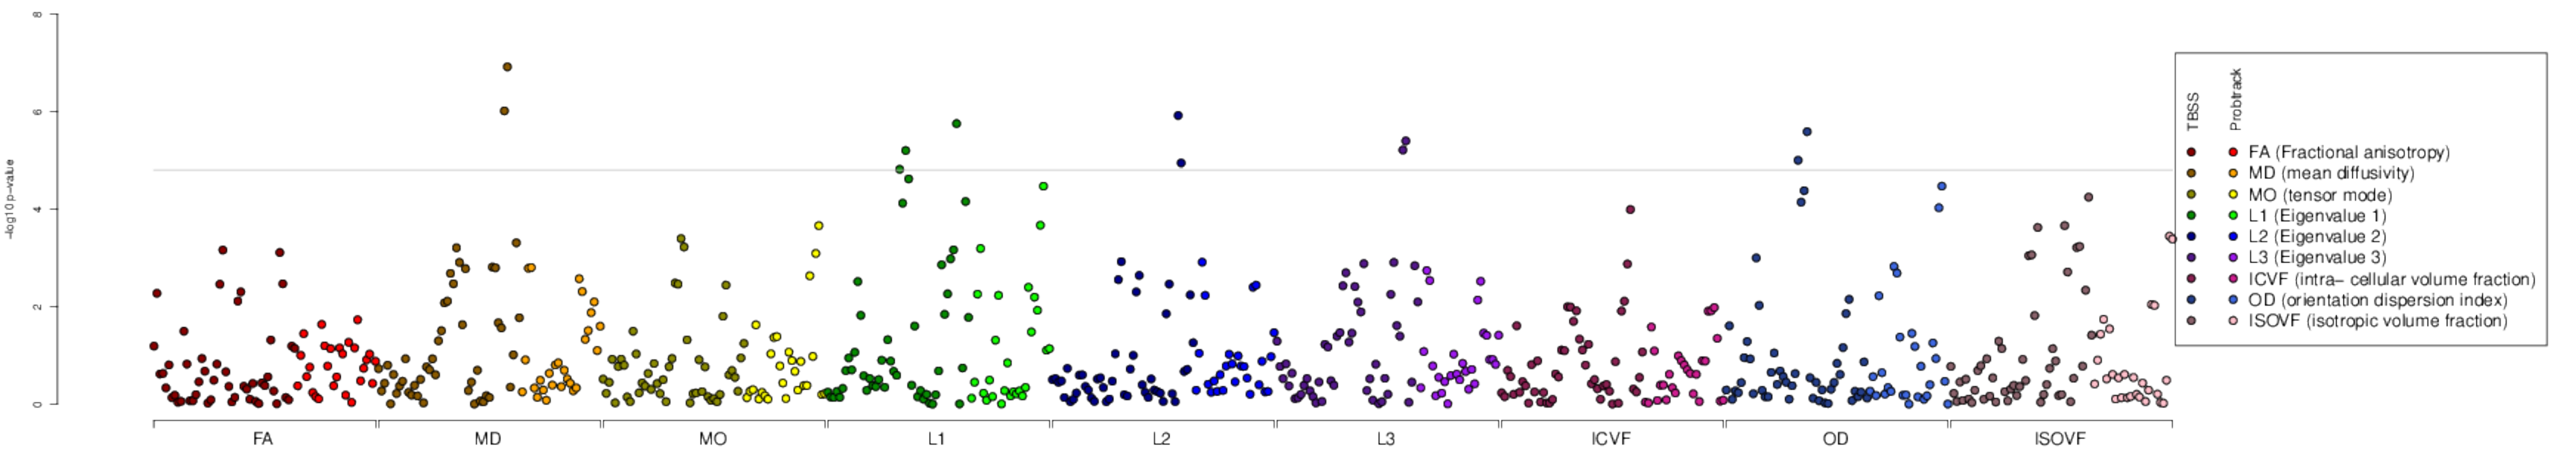

### functional MRI

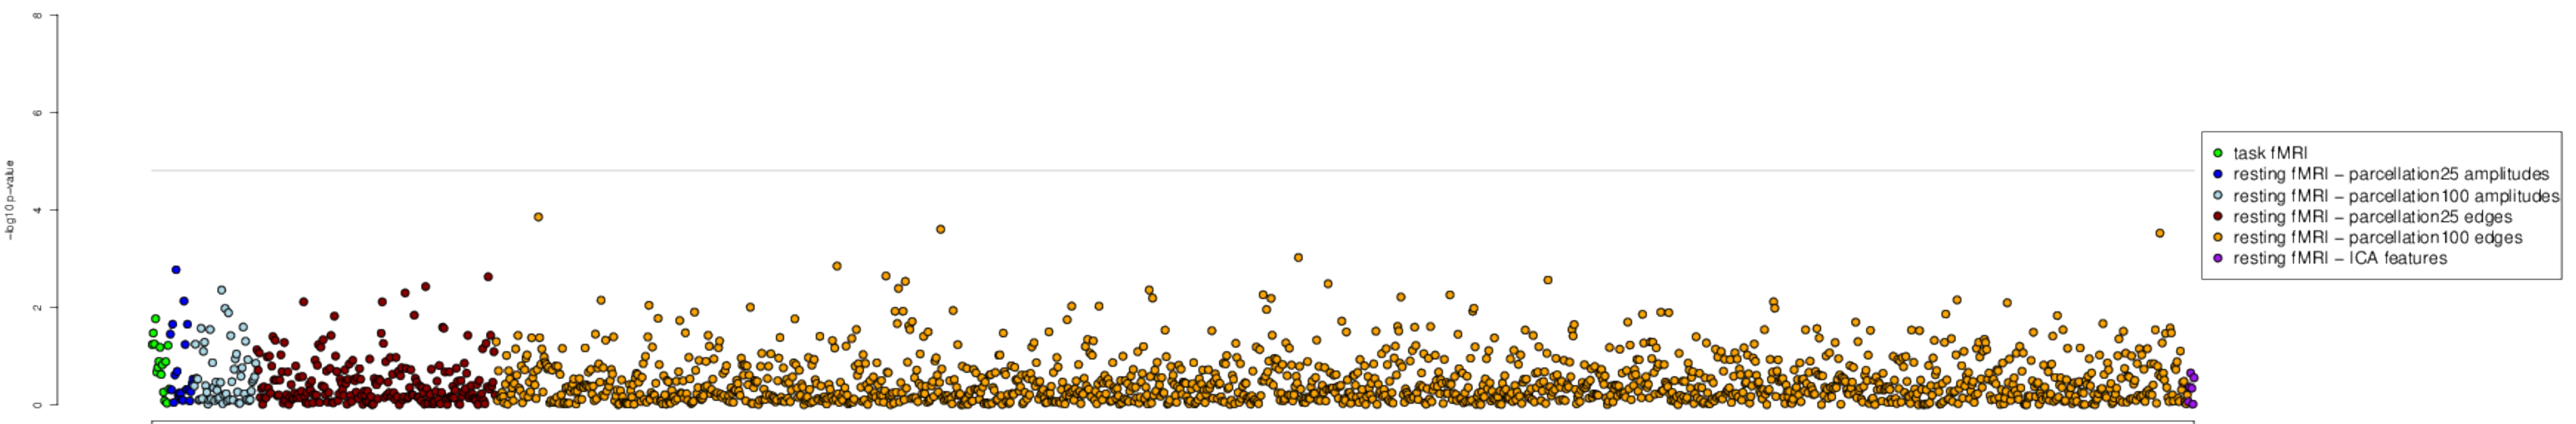

### Structural MRI

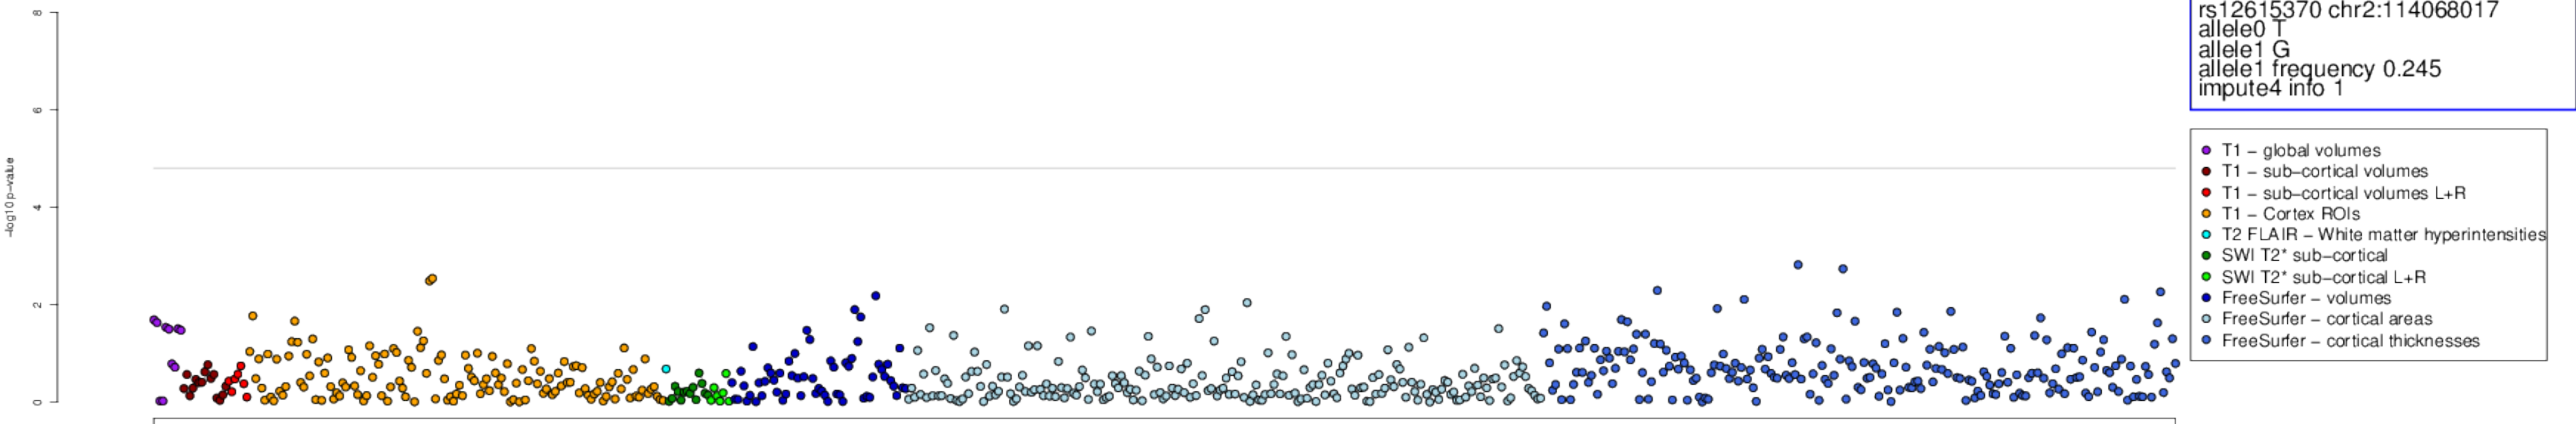

### Structural connectivity (Diffusion MRI)

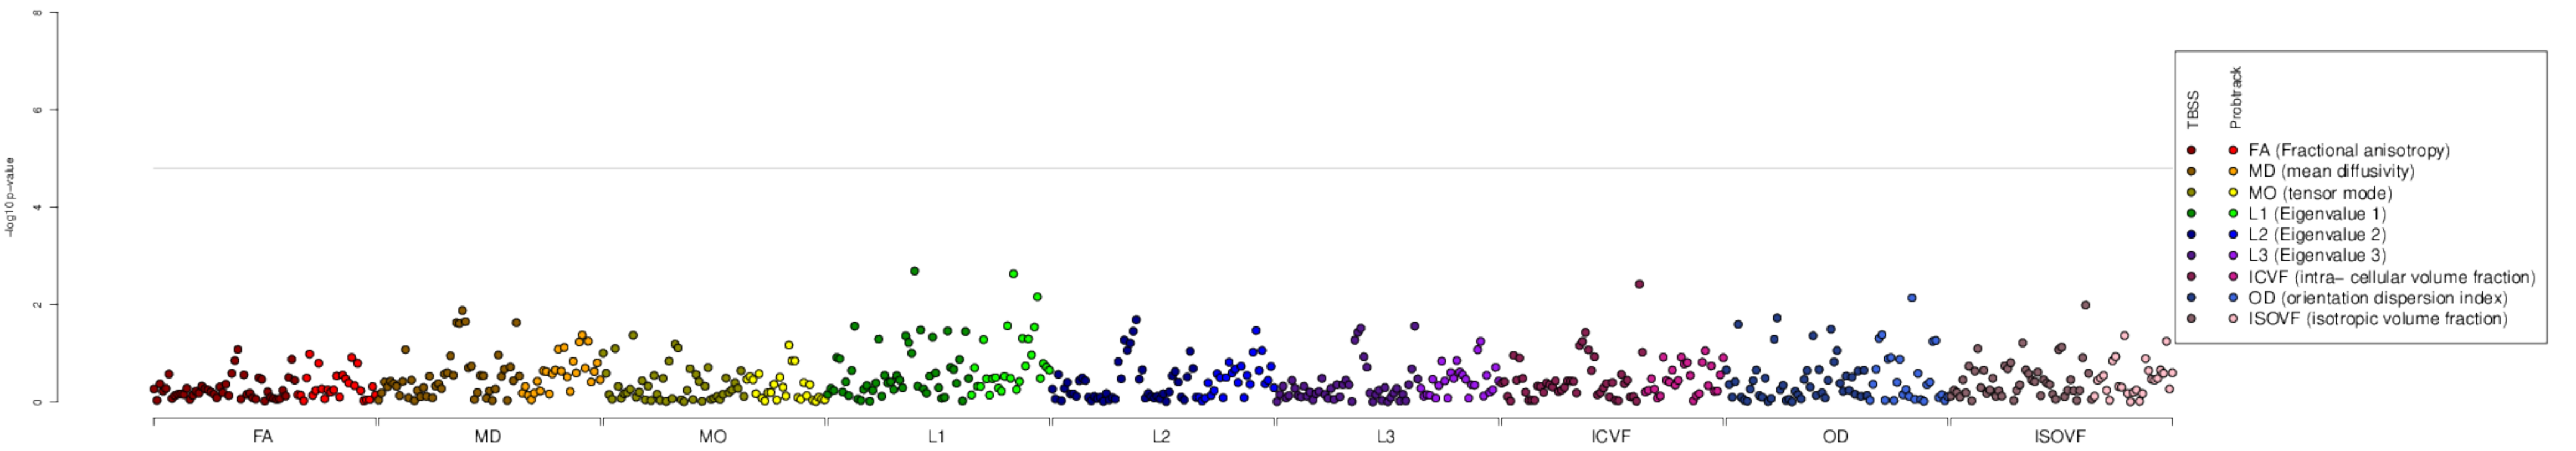

### functional MRI

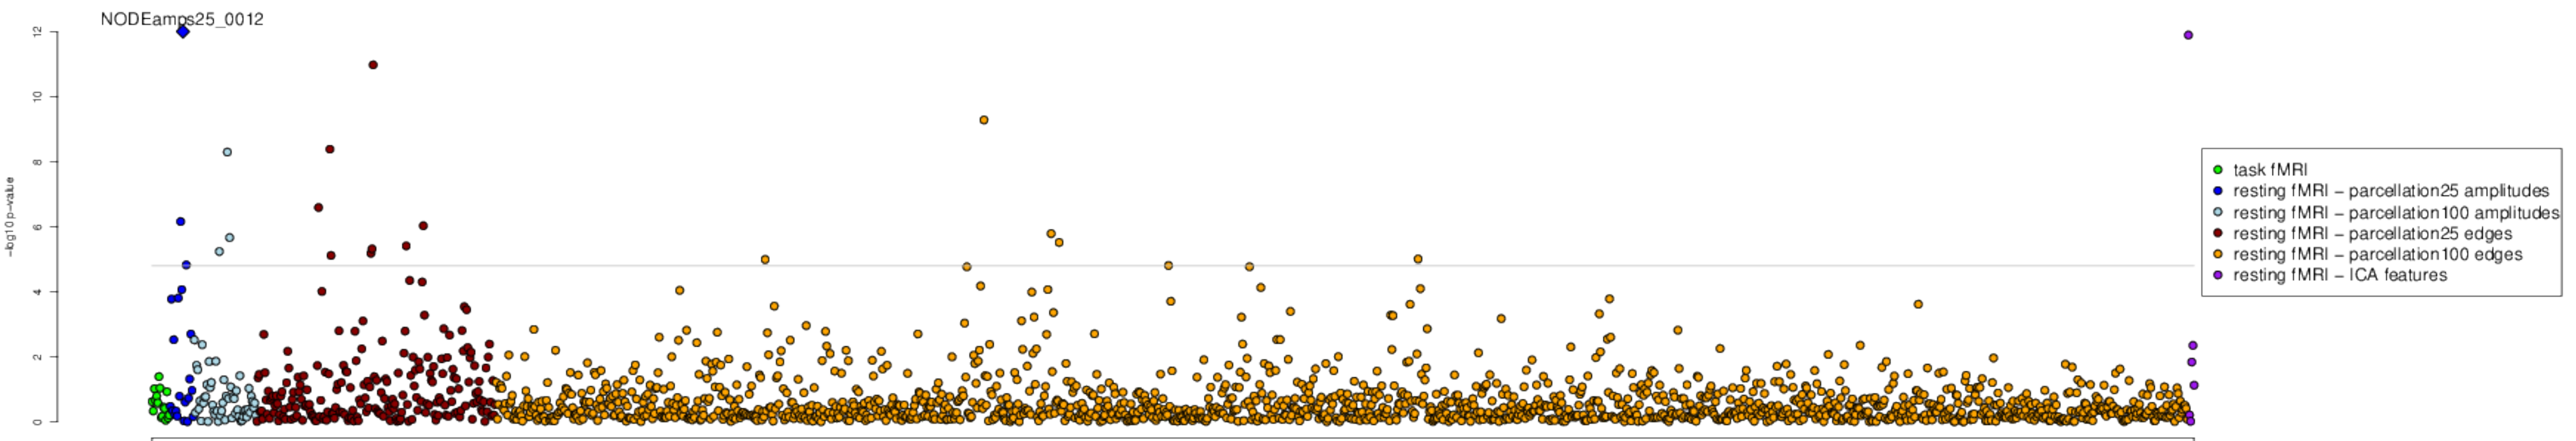

### Structural MRI

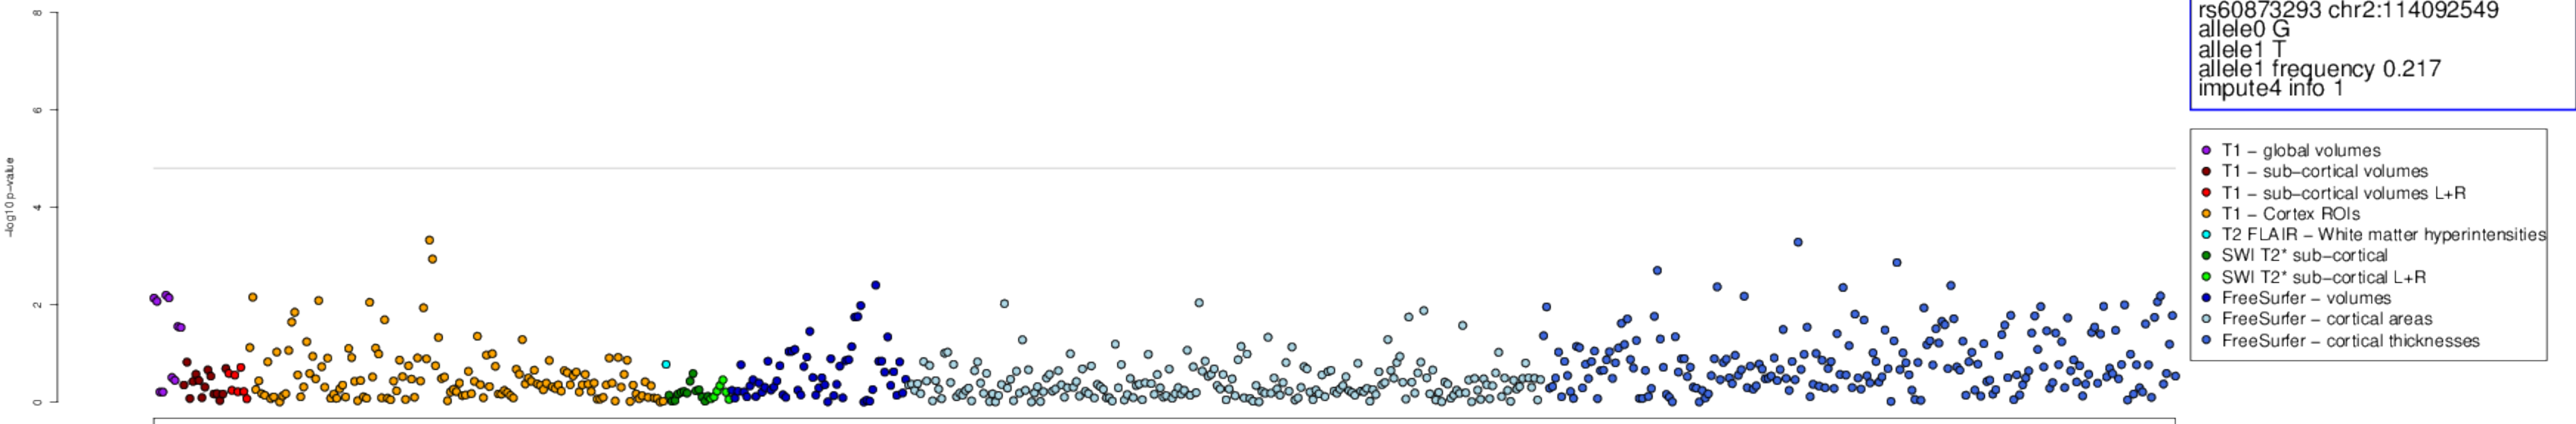

### Structural connectivity (Diffusion MRI)

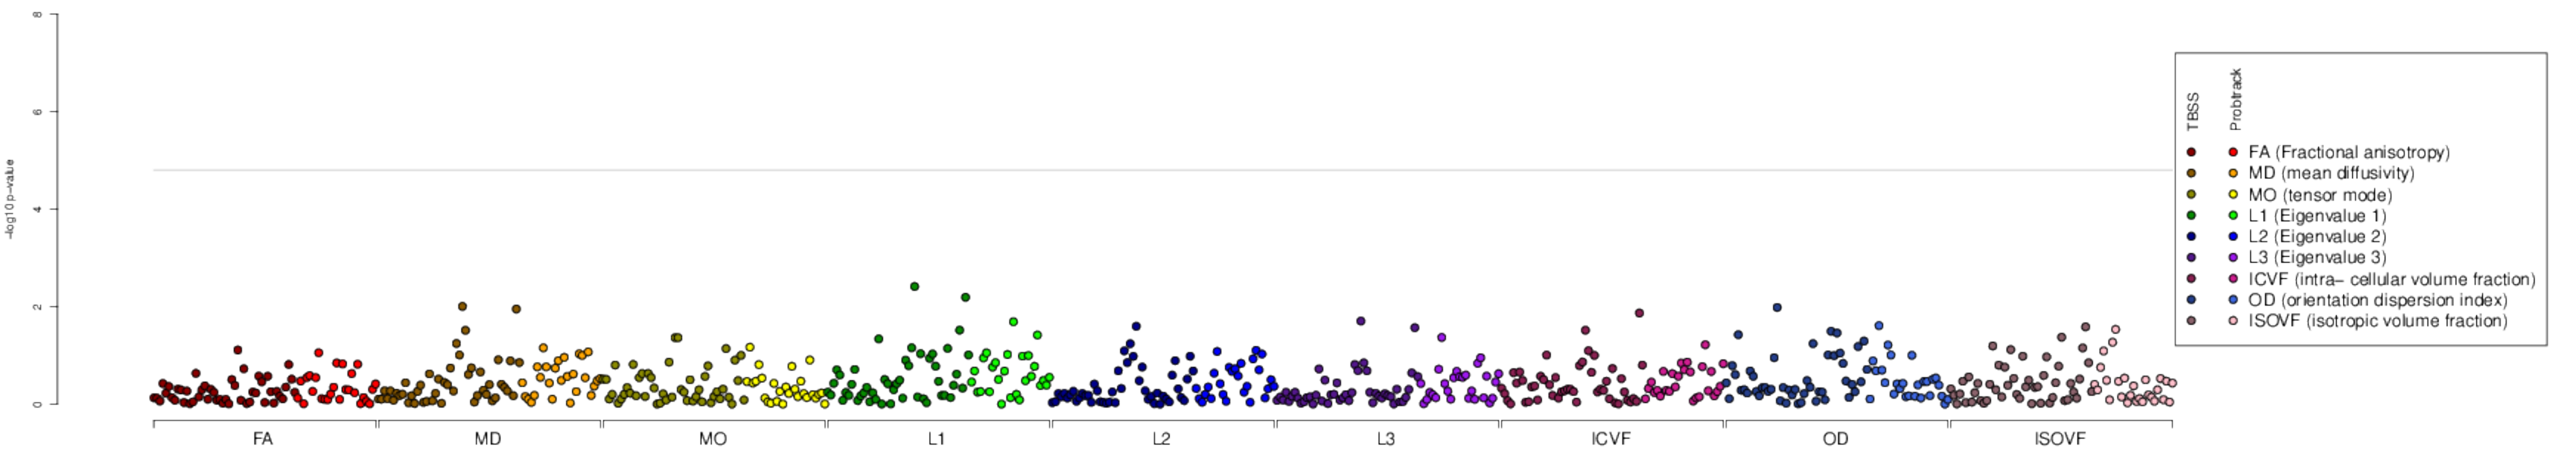

### functional MRI

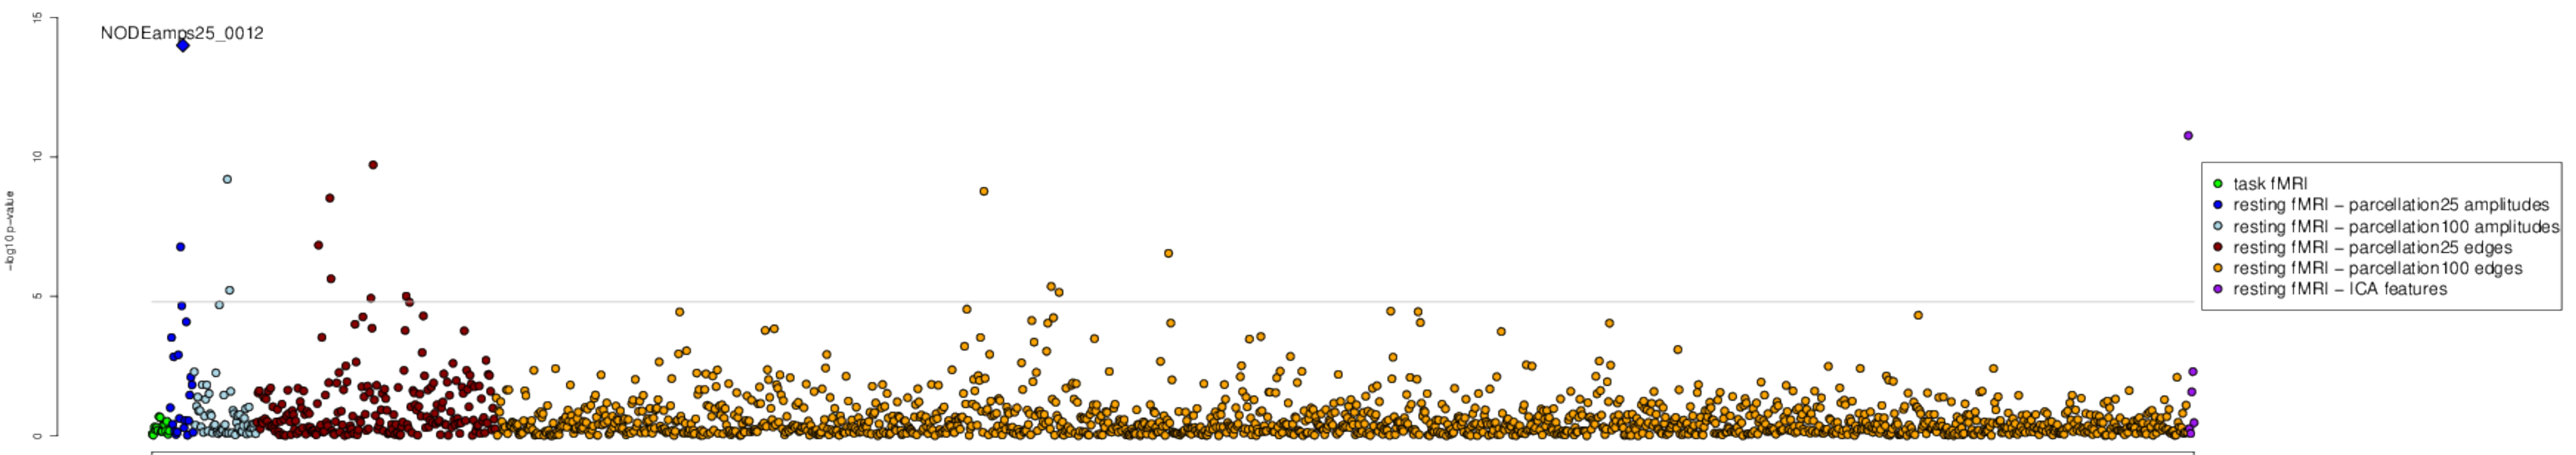

### Structural MRI

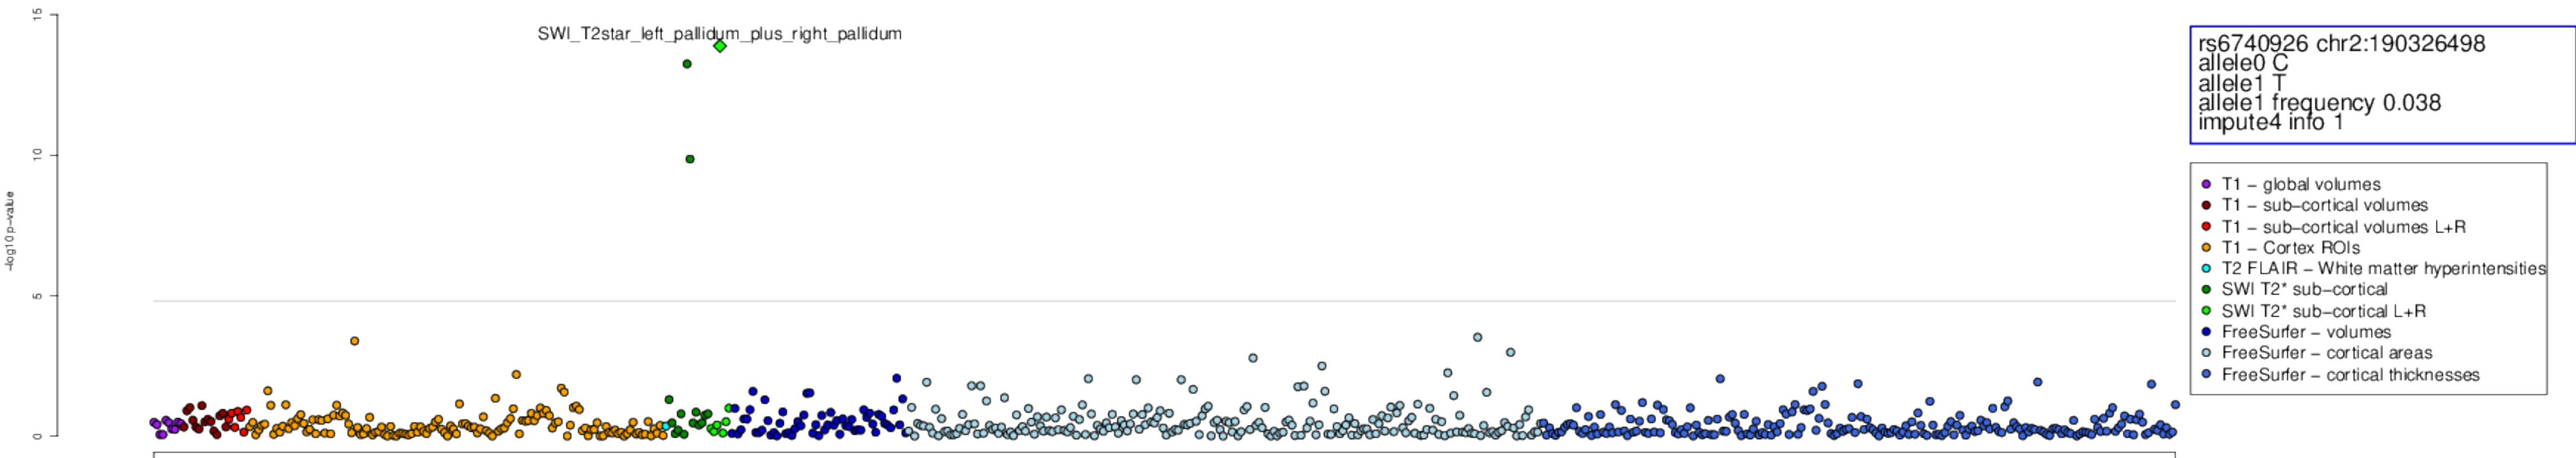

### Structural connectivity (Diffusion MRI)

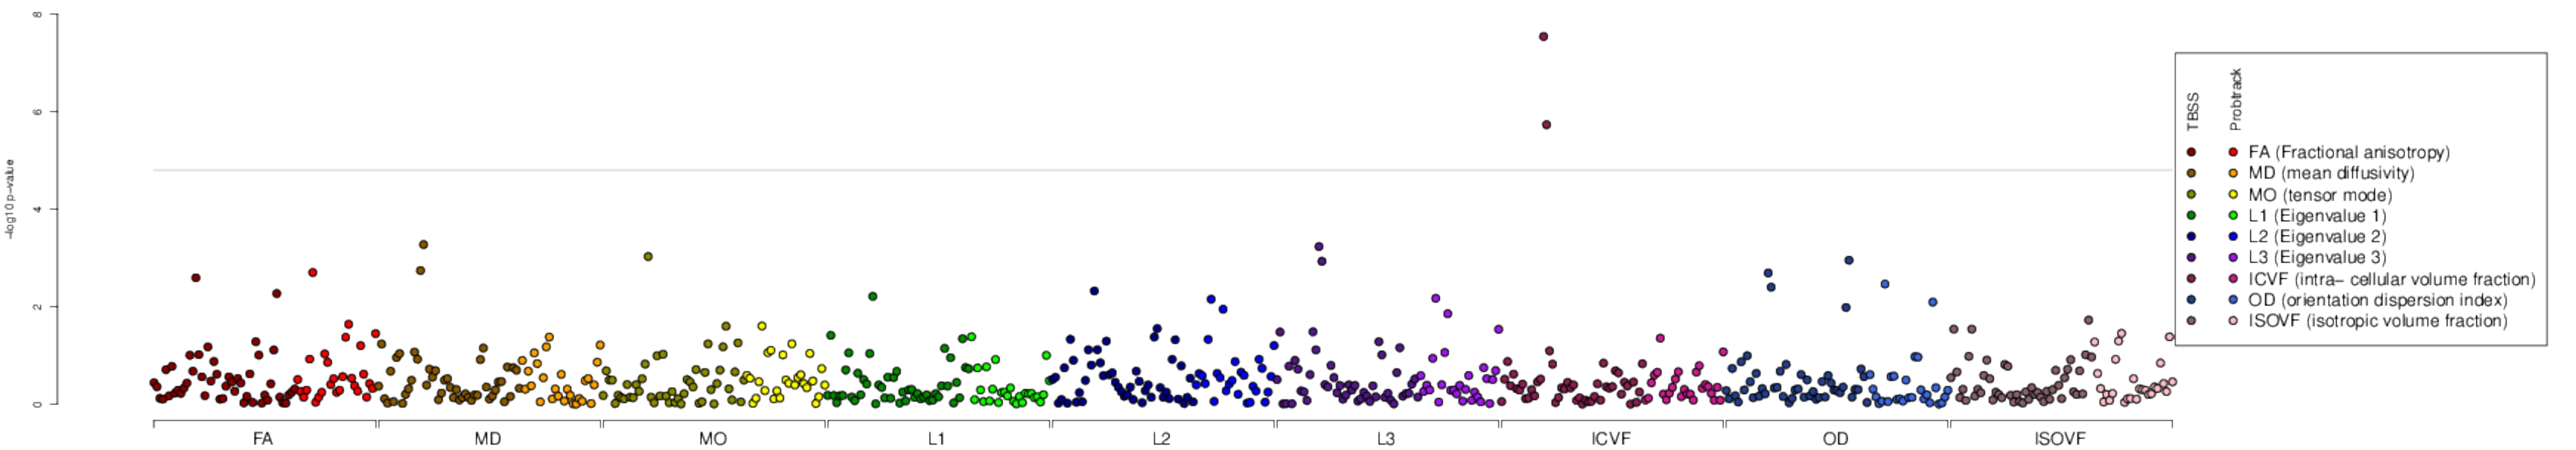

### functional MRI

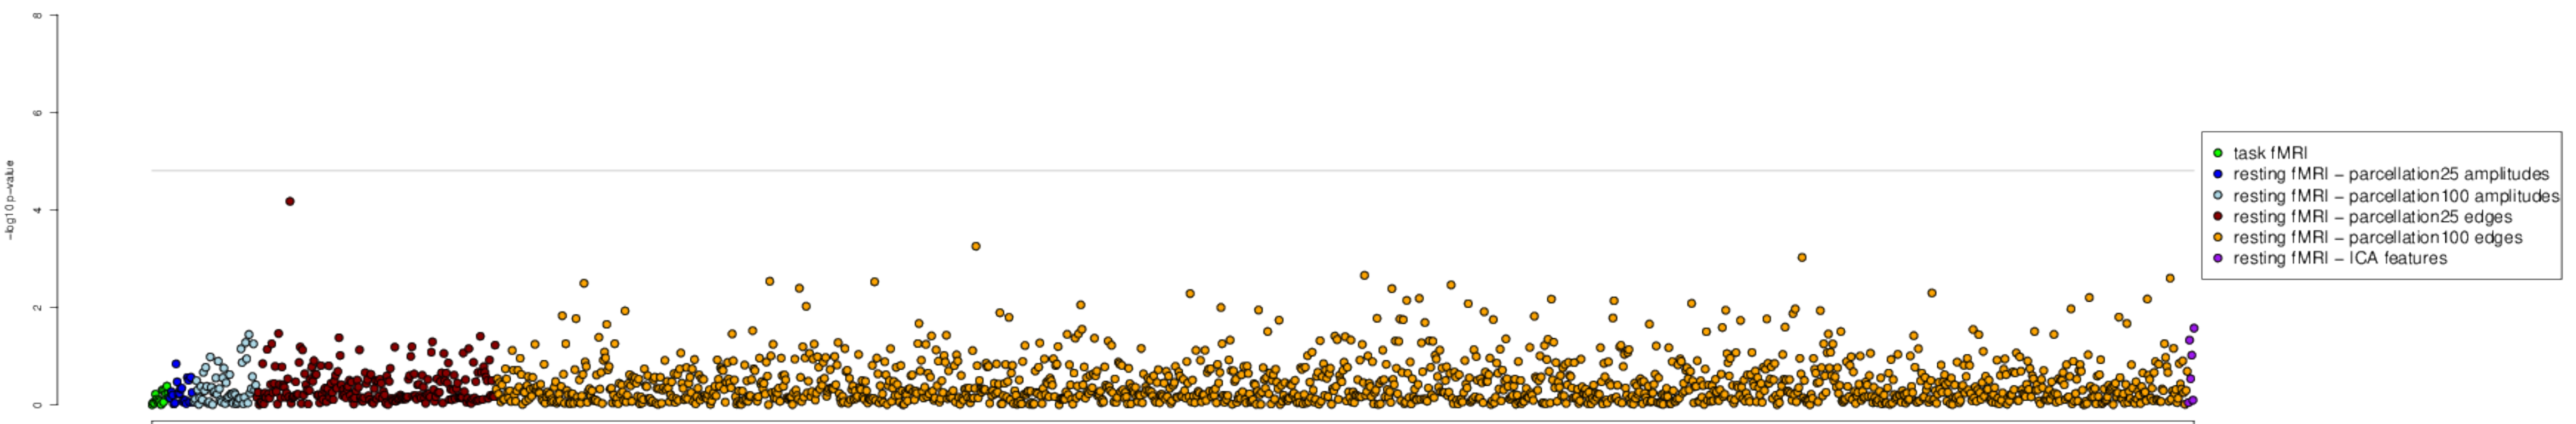

### Structural MRI

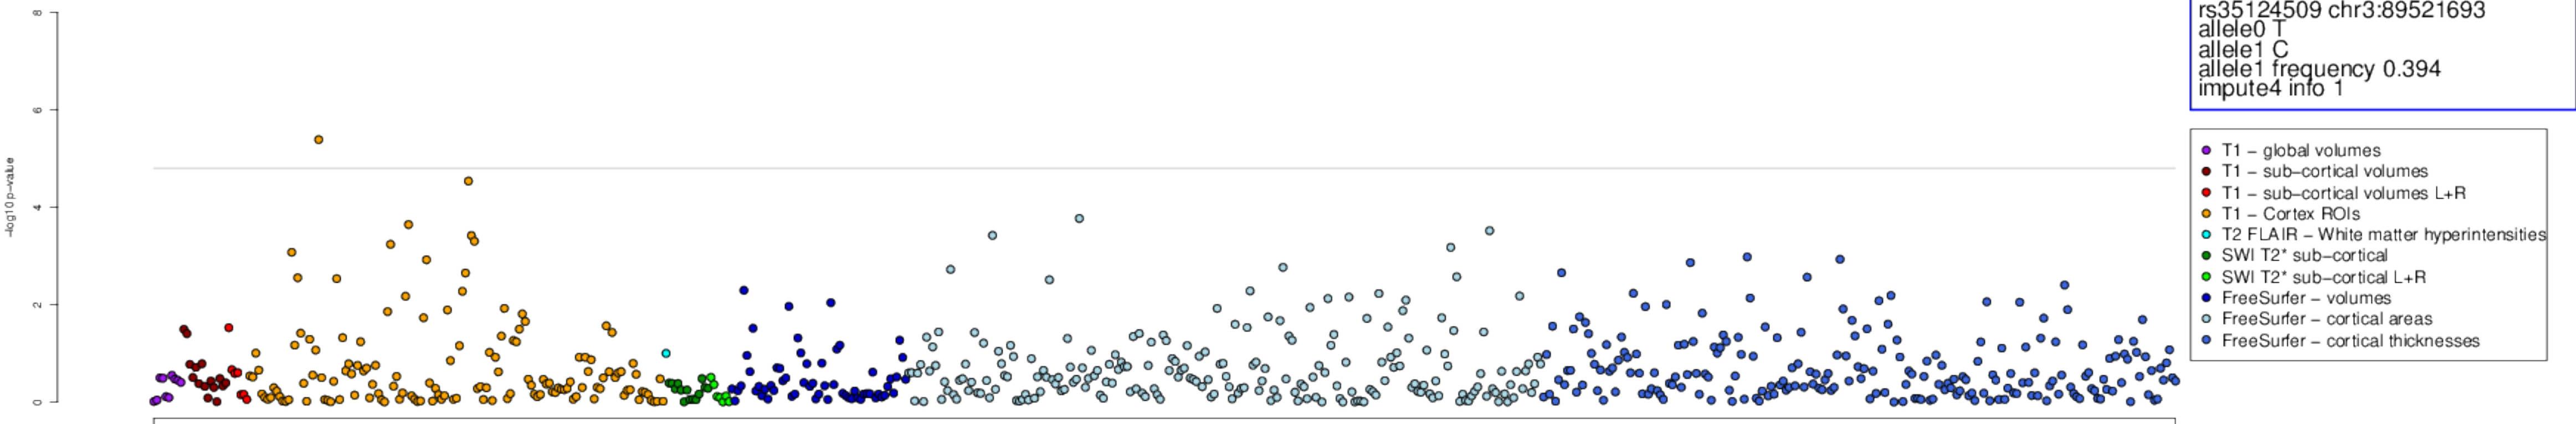

### Structural connectivity (Diffusion MRI)

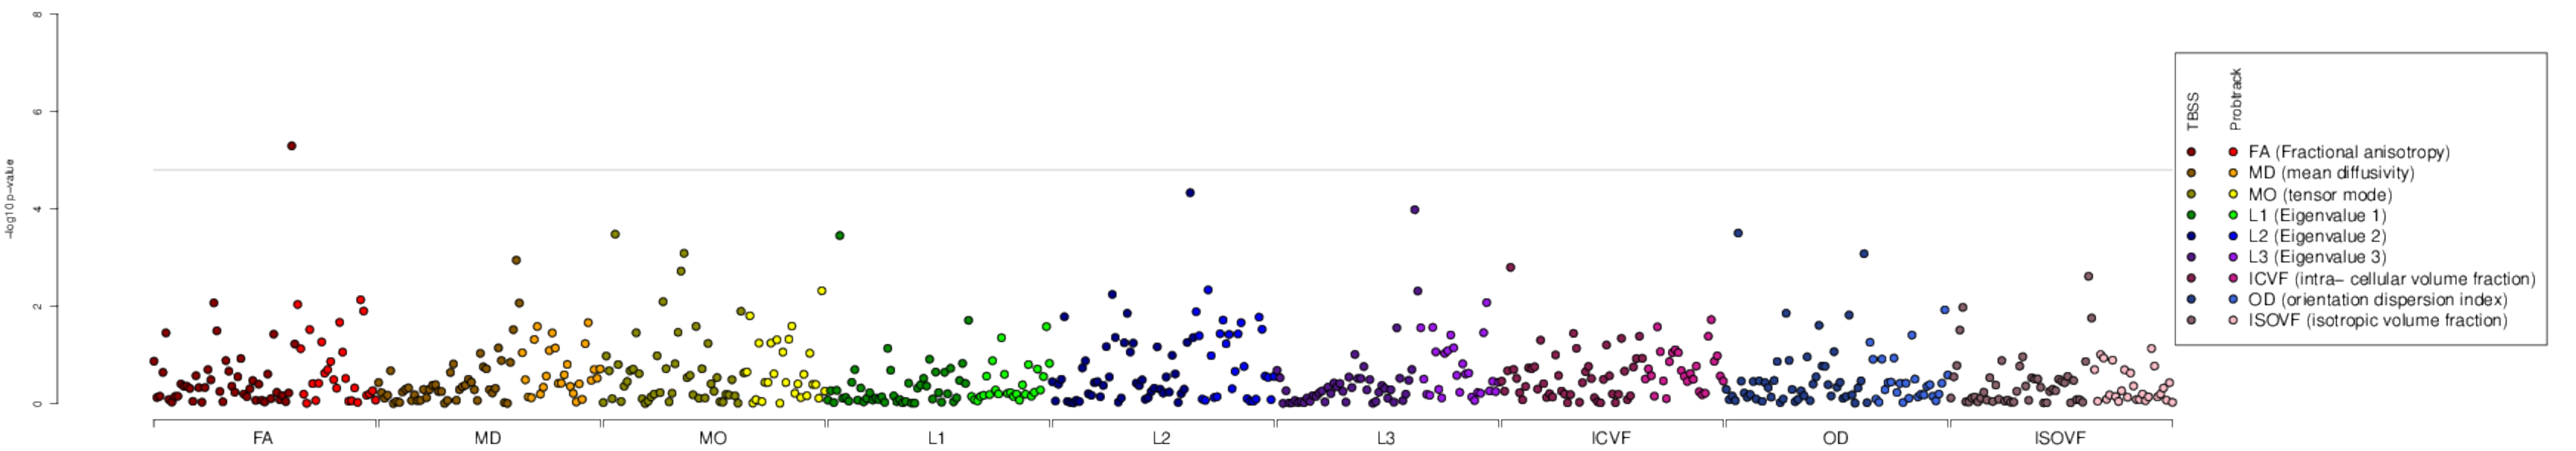

### functional MRI

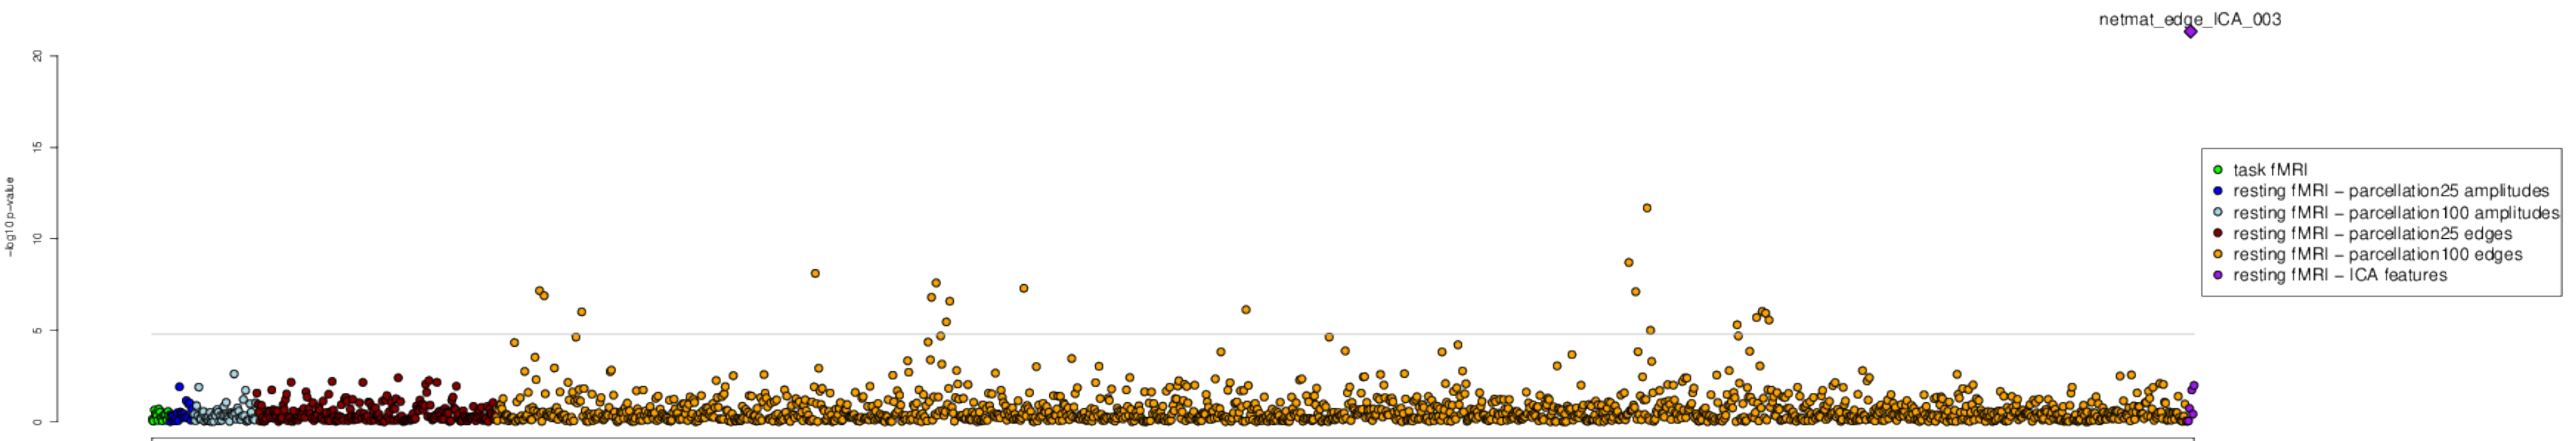



### Structural MRI

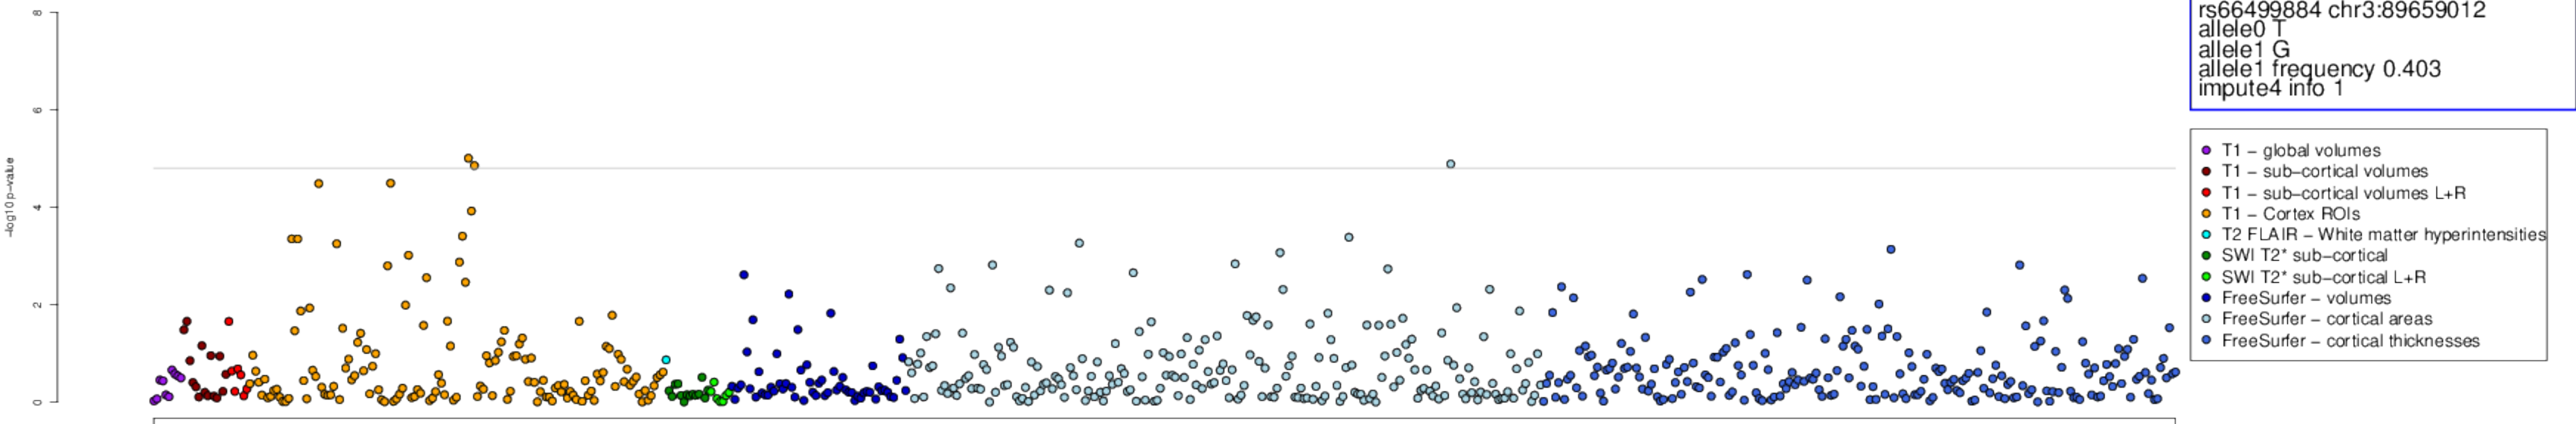

### Structural connectivity (Diffusion MRI)

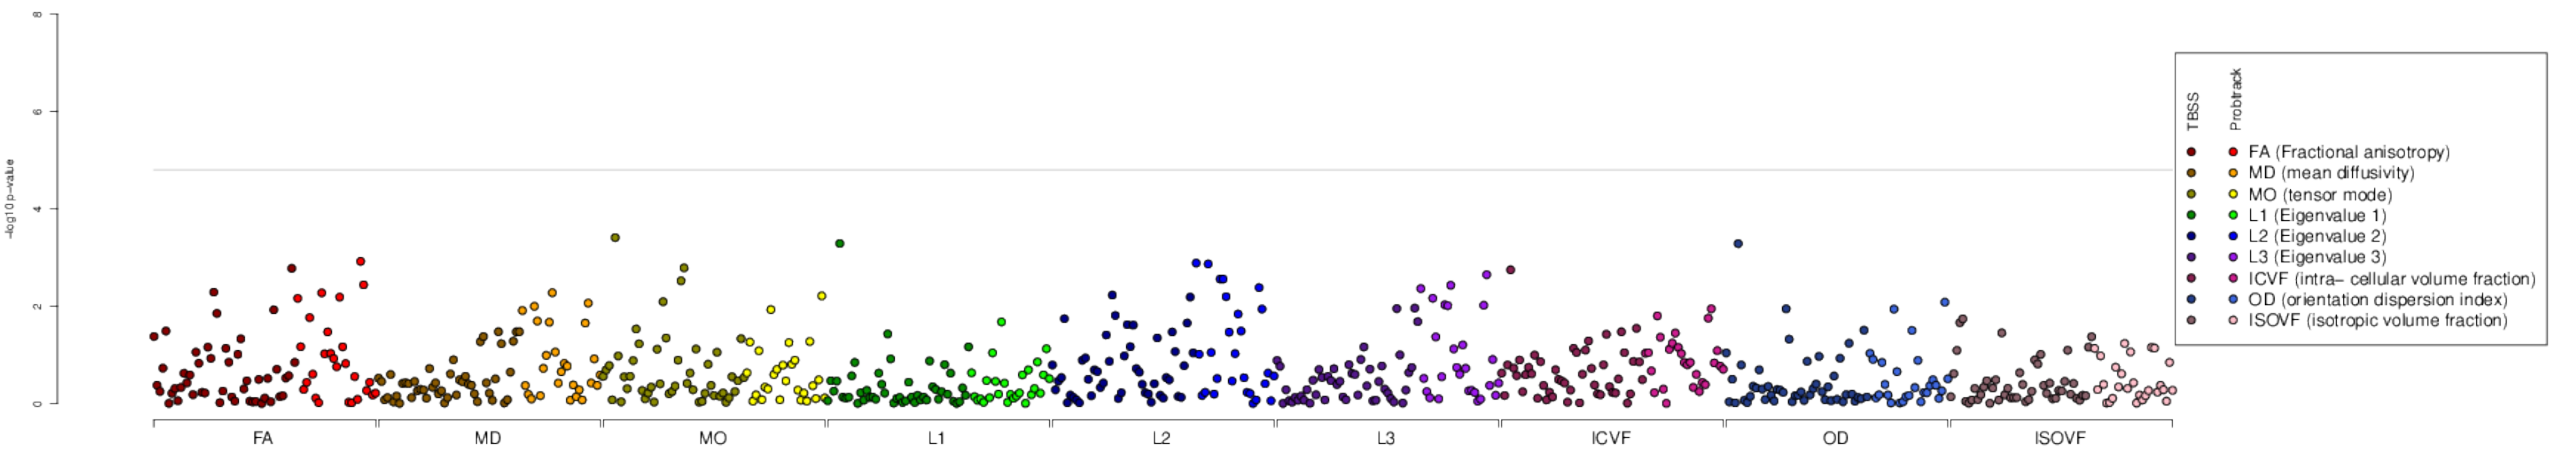

### functional MRI

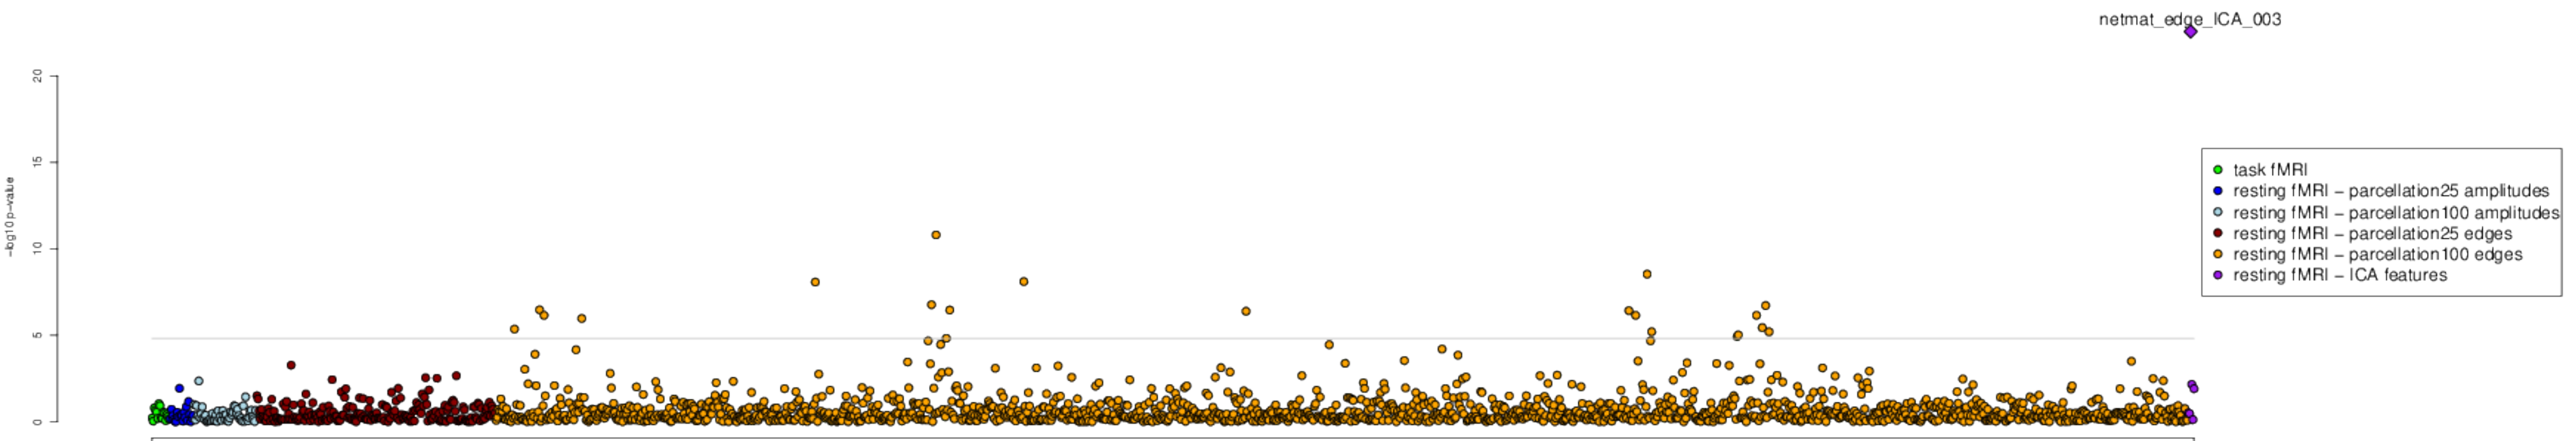

### Structural MRI

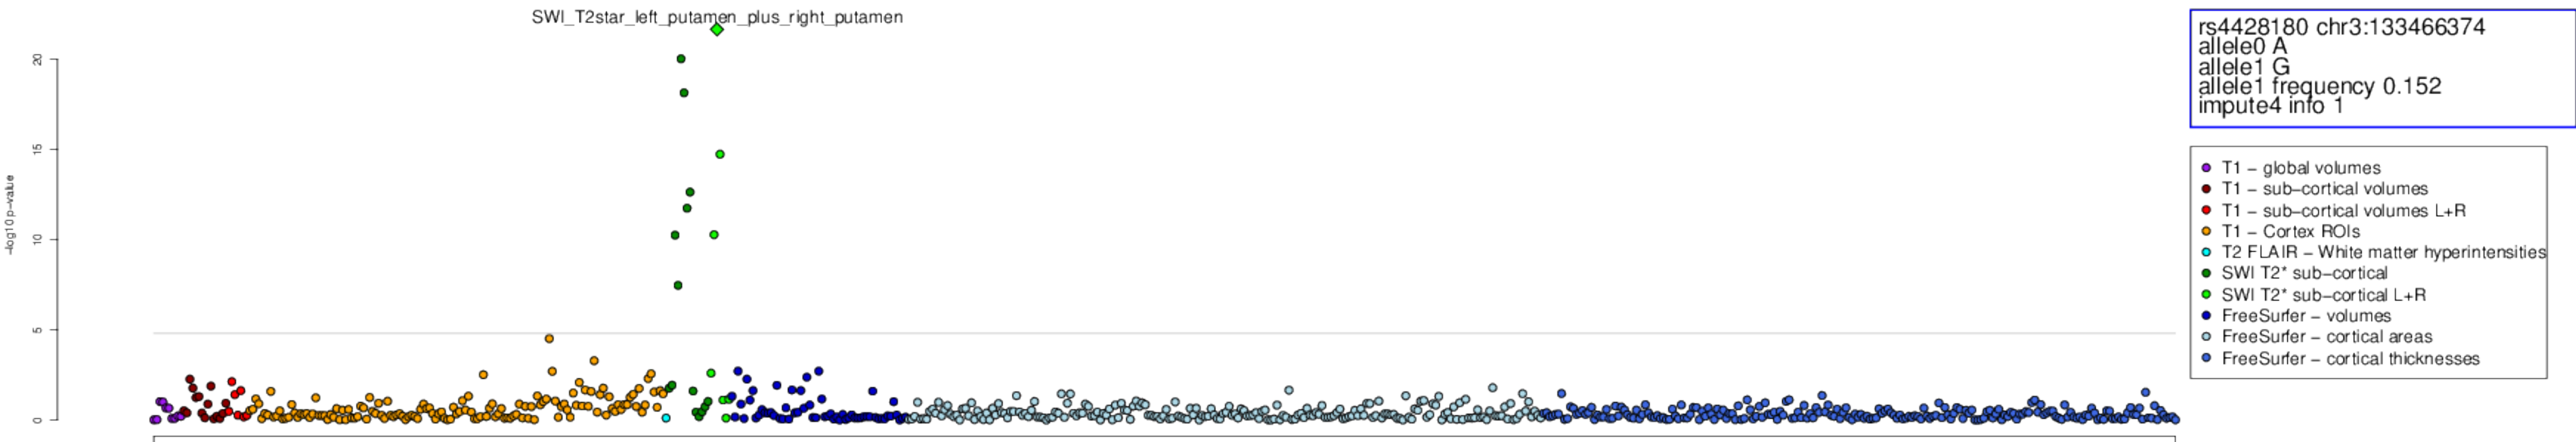

### Structural connectivity (Diffusion MRI)

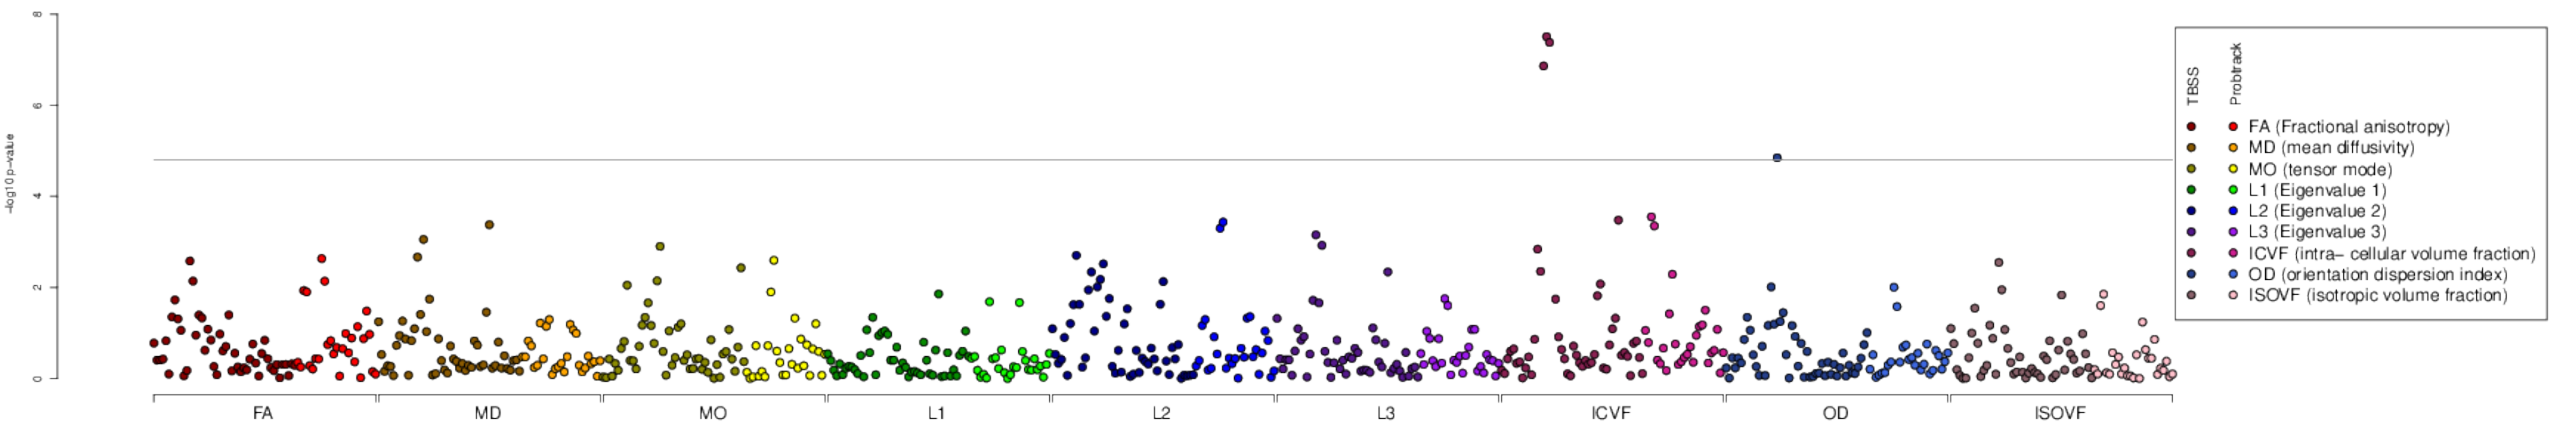

### functional MRI

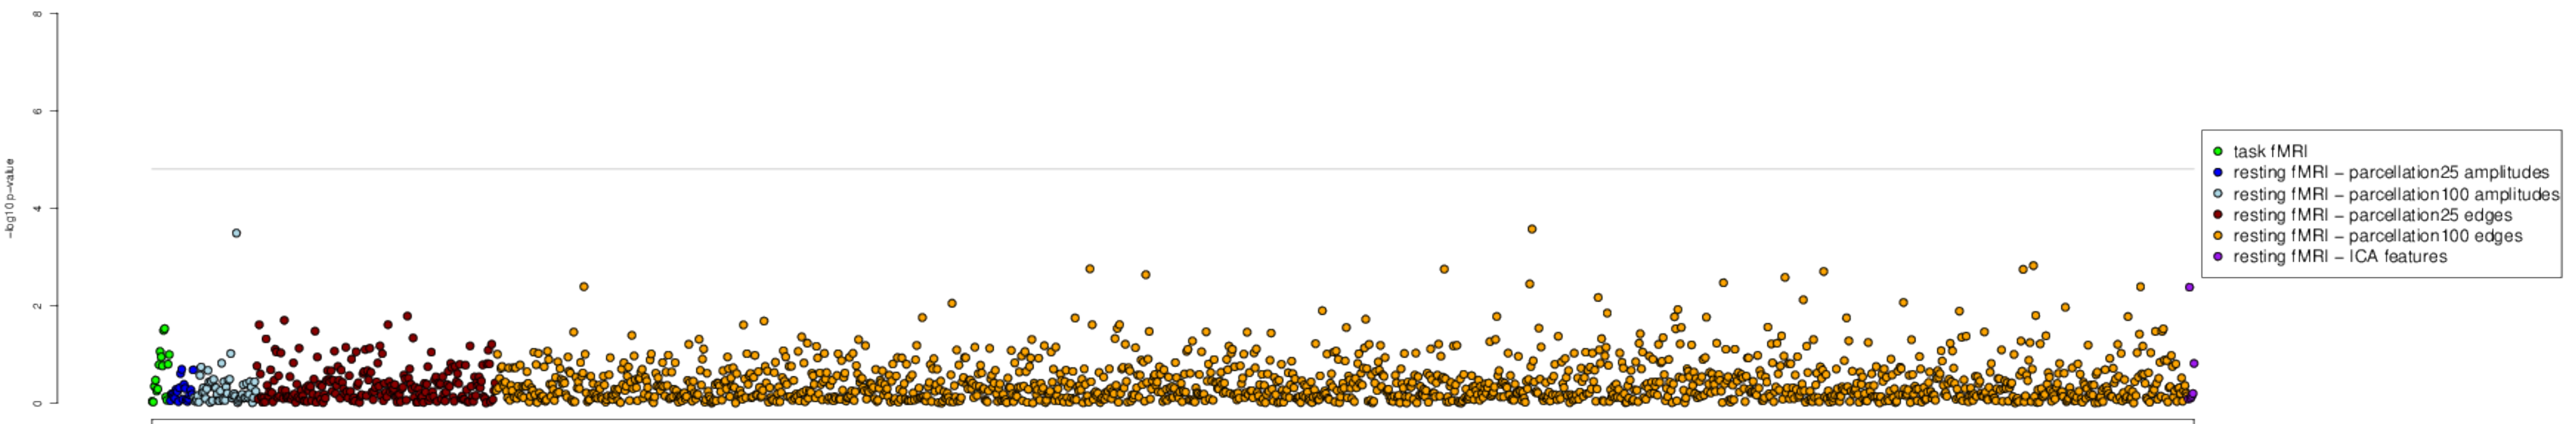

### Structural MRI

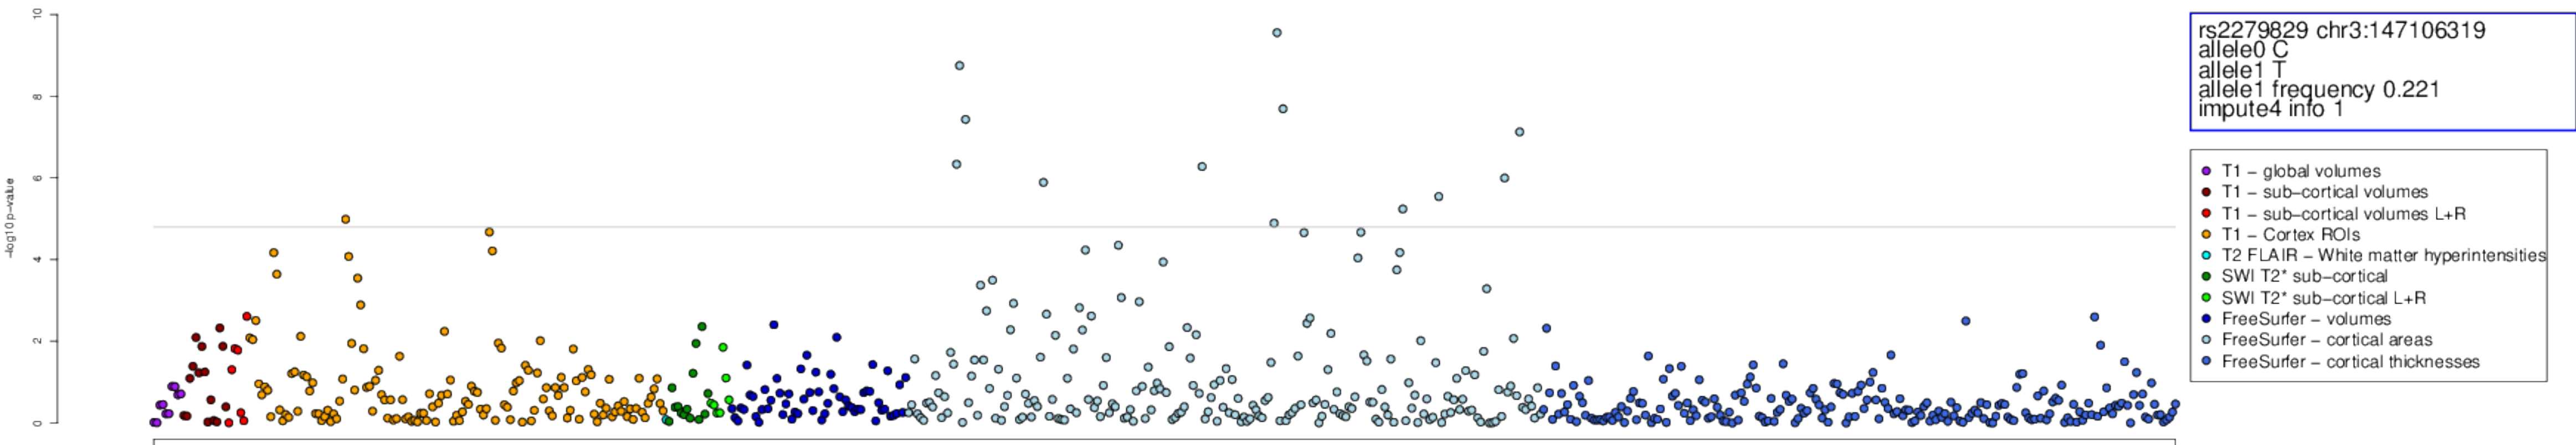

### Structural connectivity (Diffusion MRI)

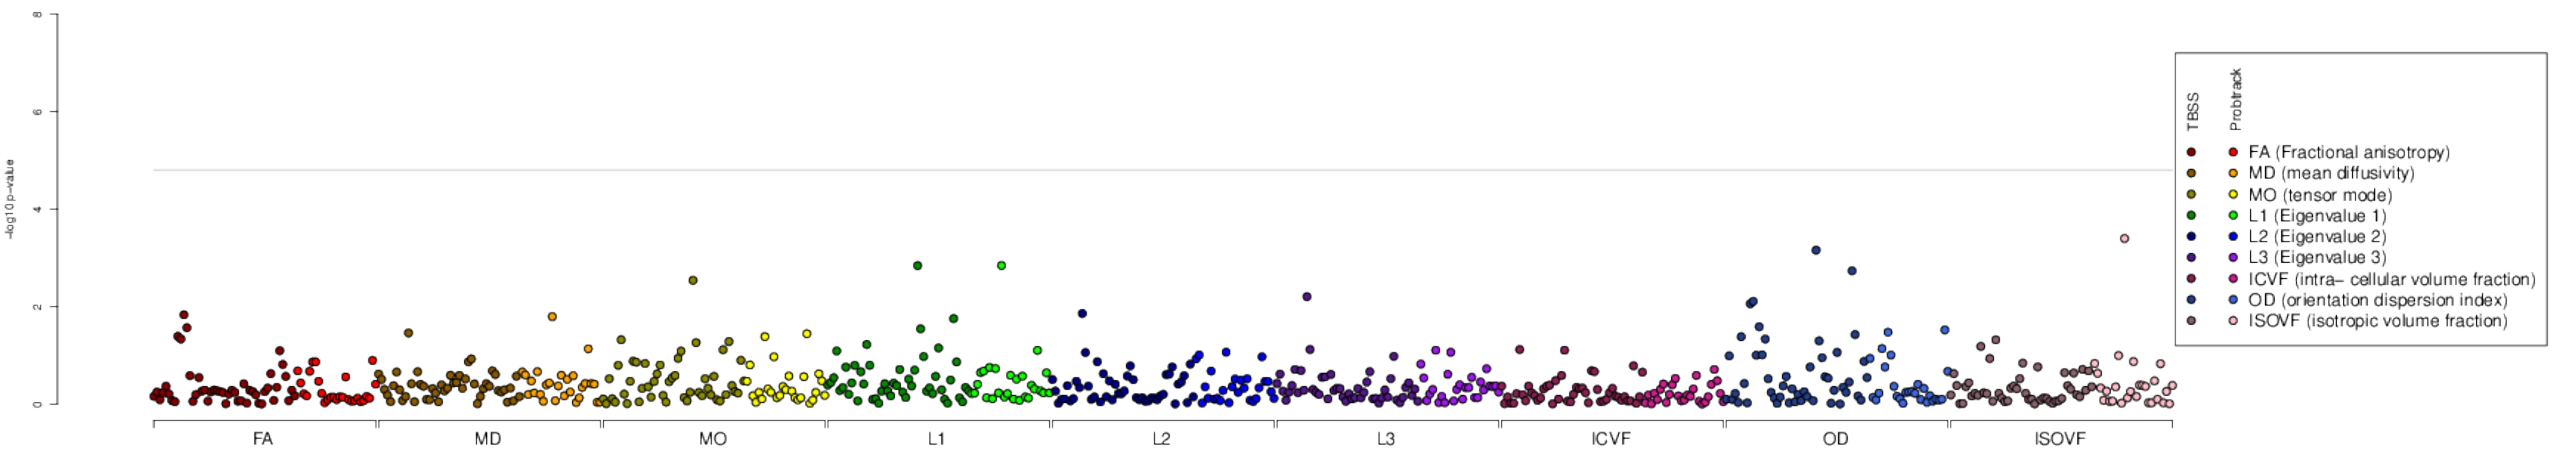

### functional MRI

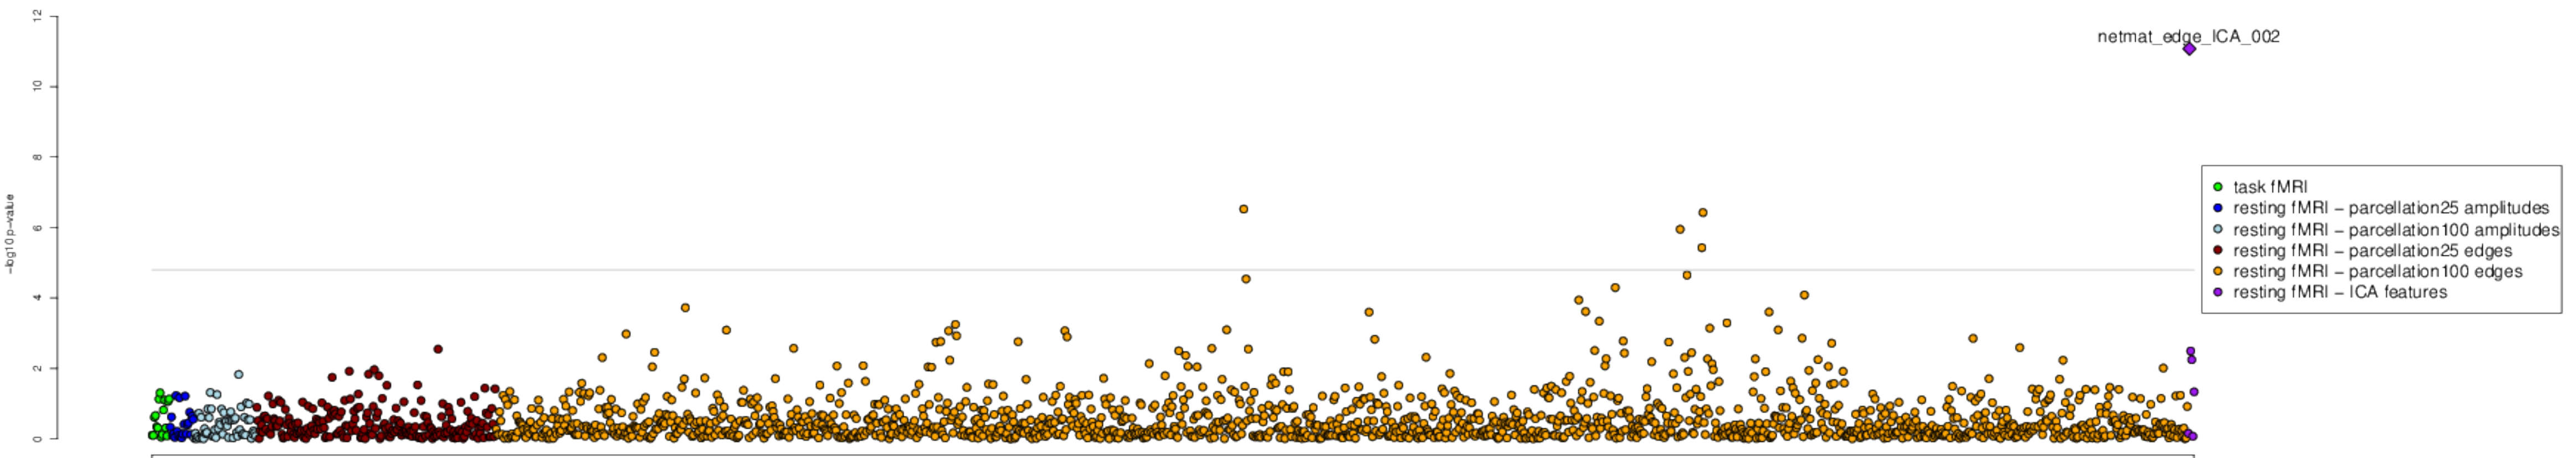

### Structural MRI

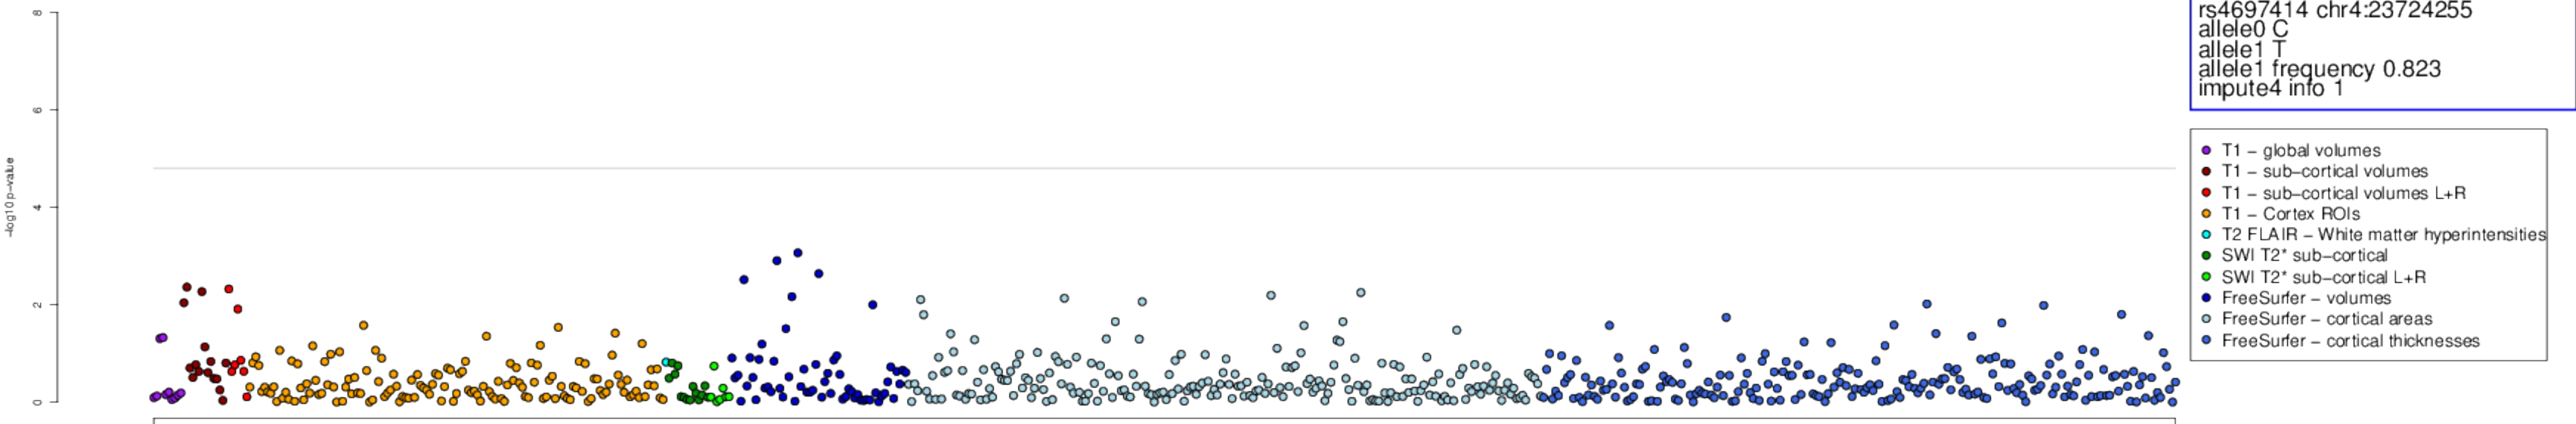

### Structural connectivity (Diffusion MRI)

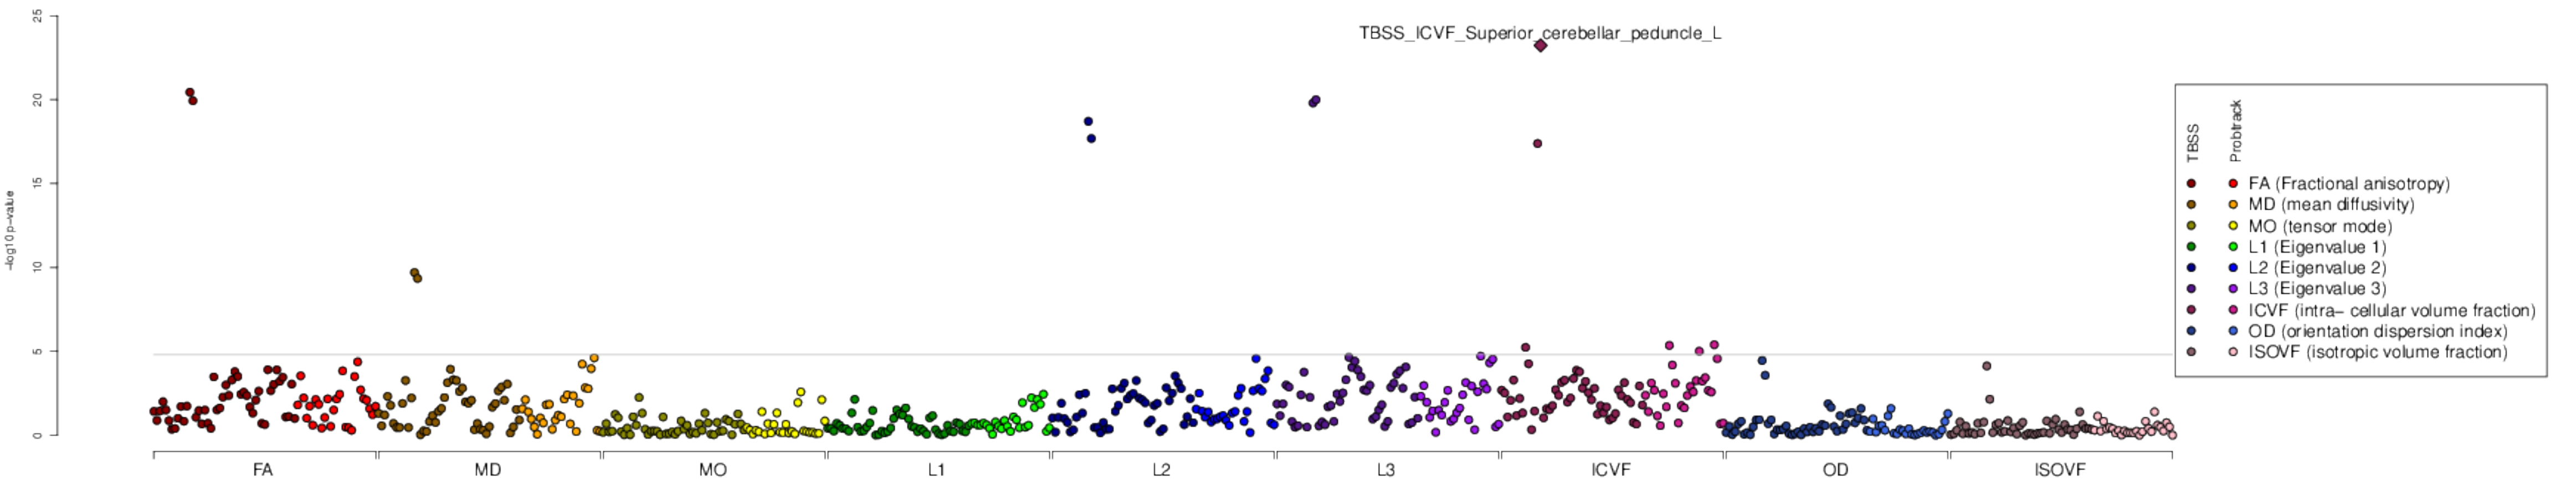

### functional MRI

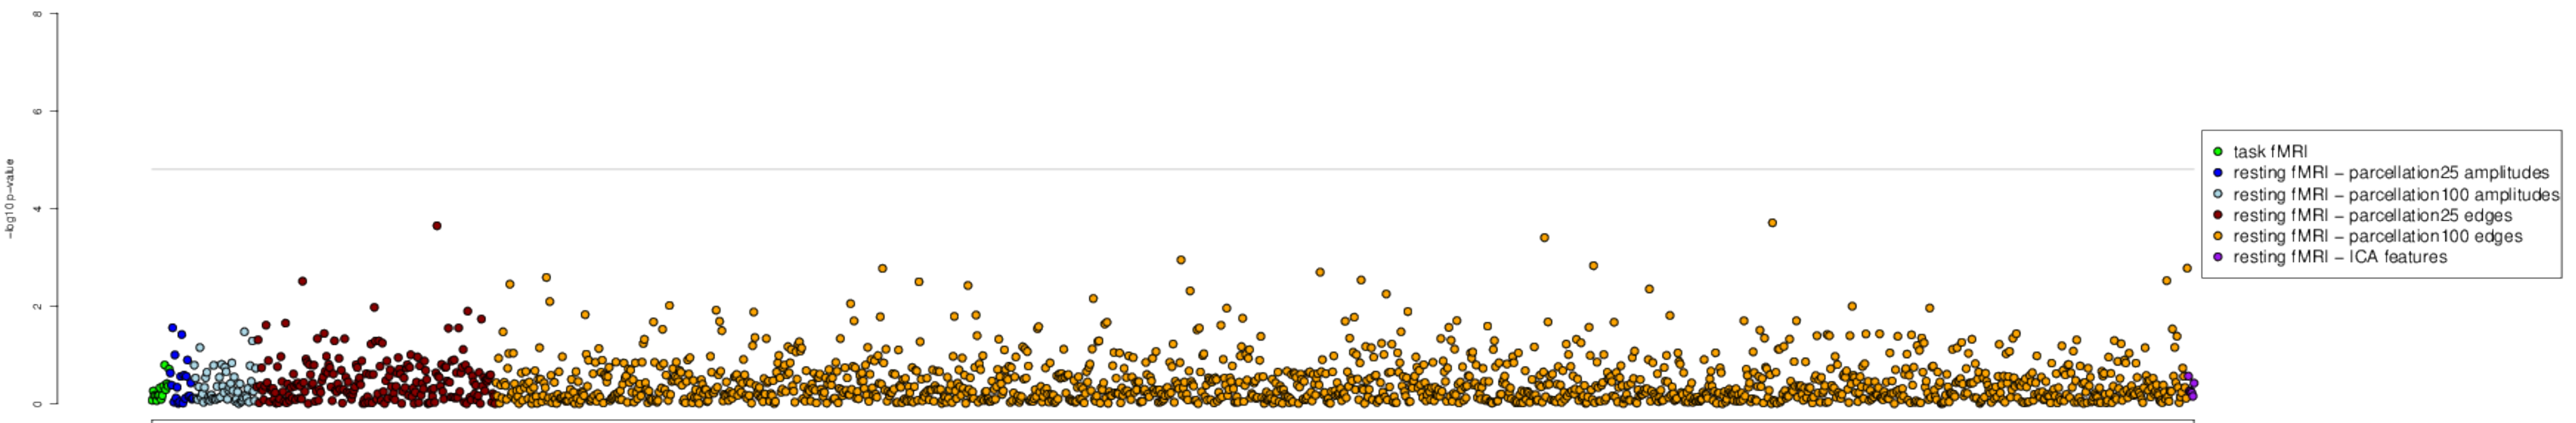

### Structural MRI

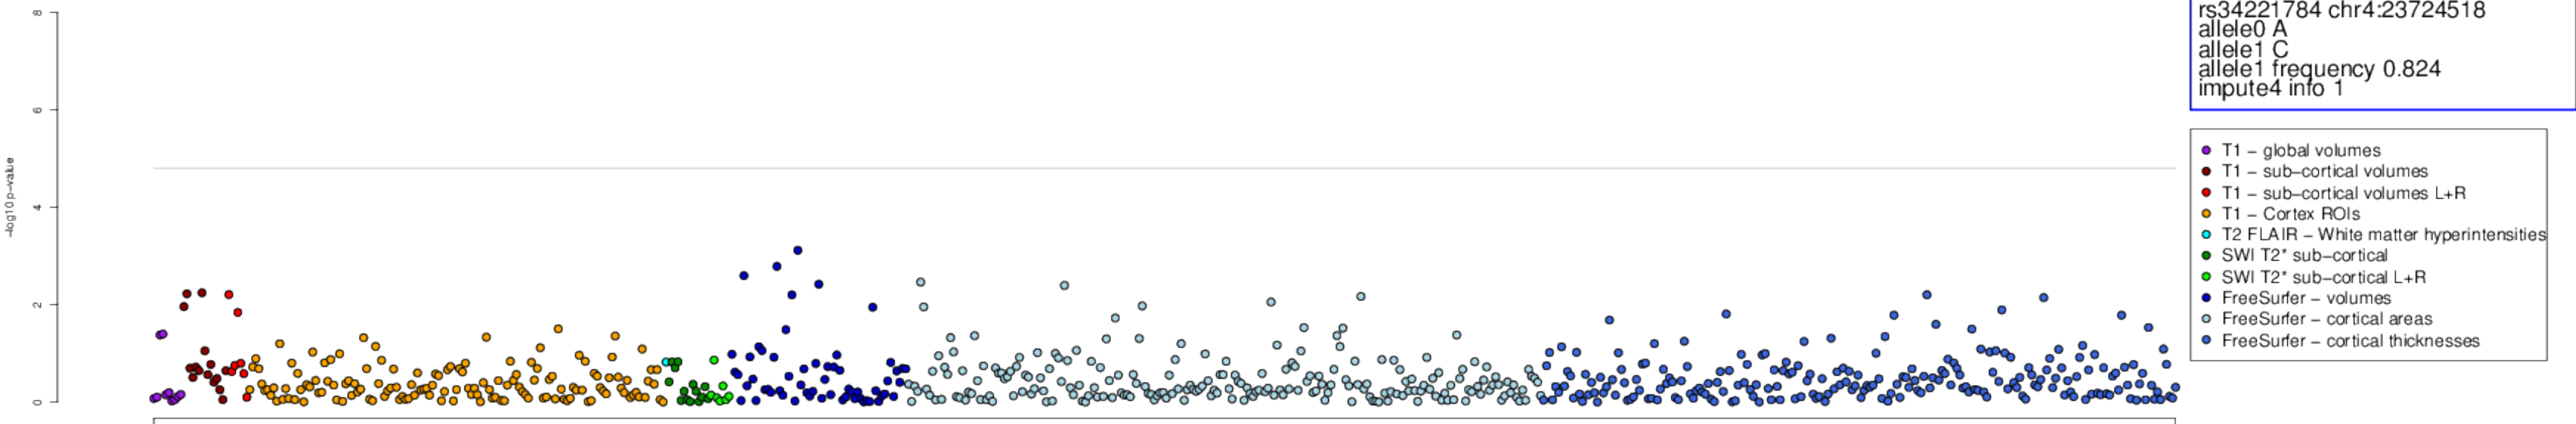

### Structural connectivity (Diffusion MRI)

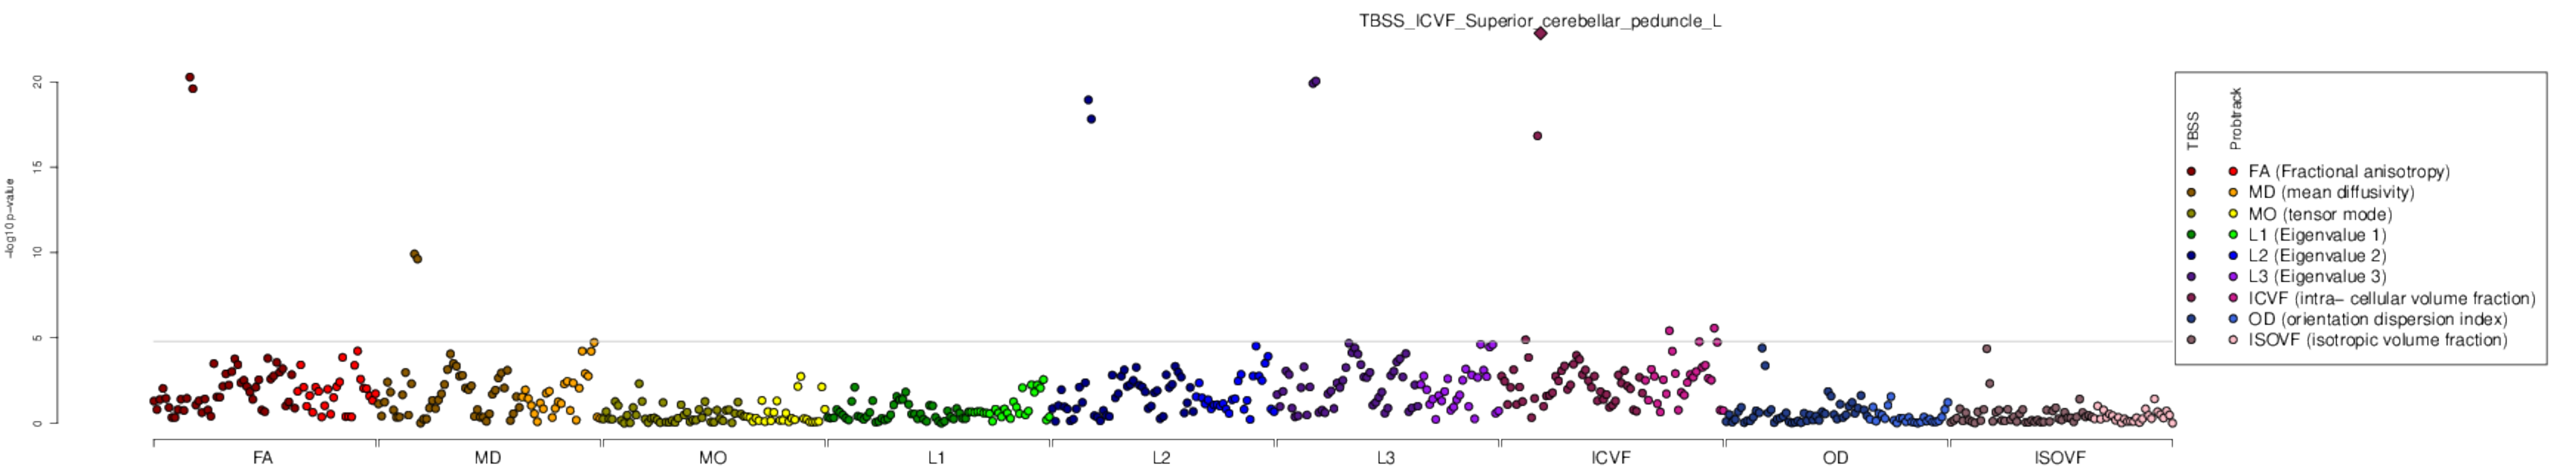

### functional MRI

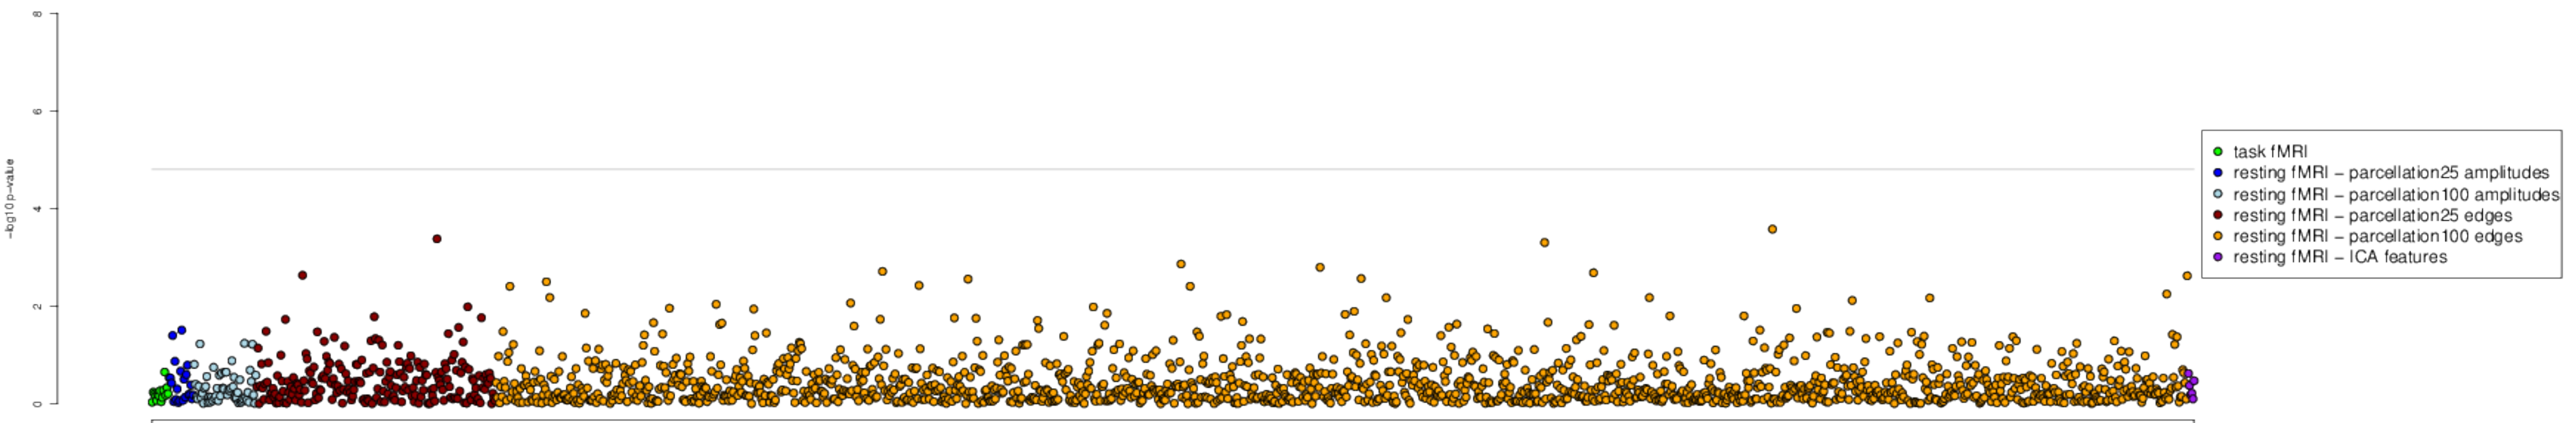

### Structural MRI

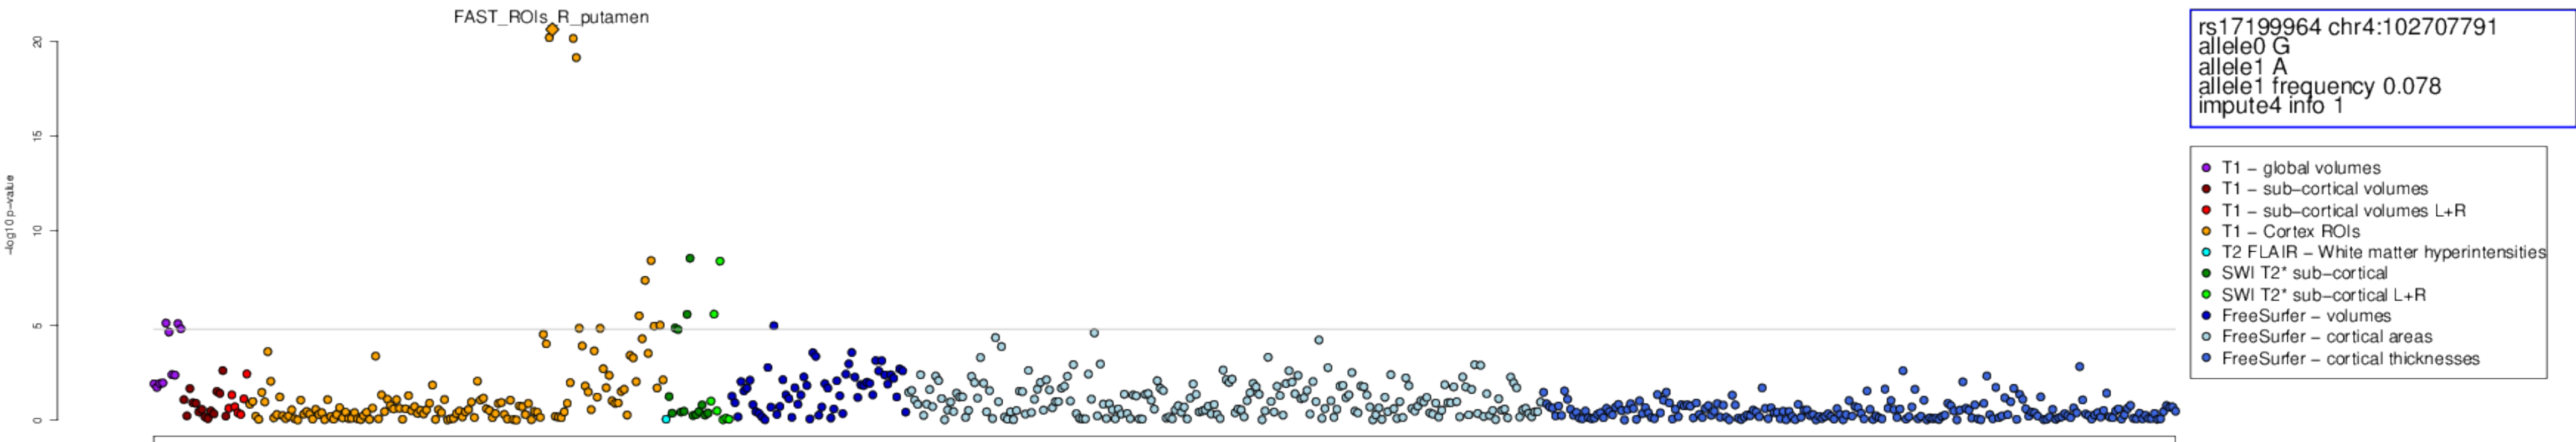

### Structural connectivity (Diffusion MRI)

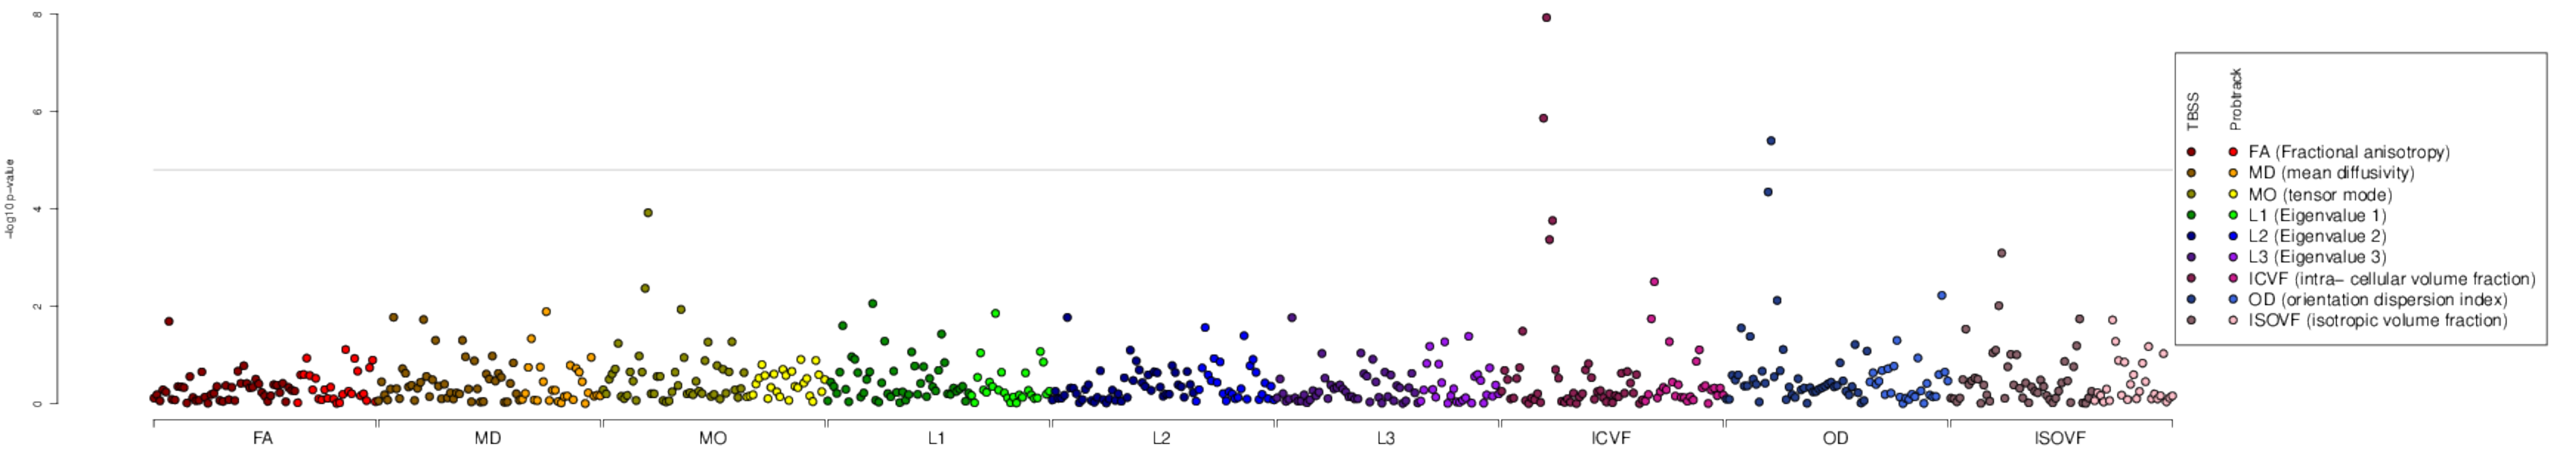

### functional MRI

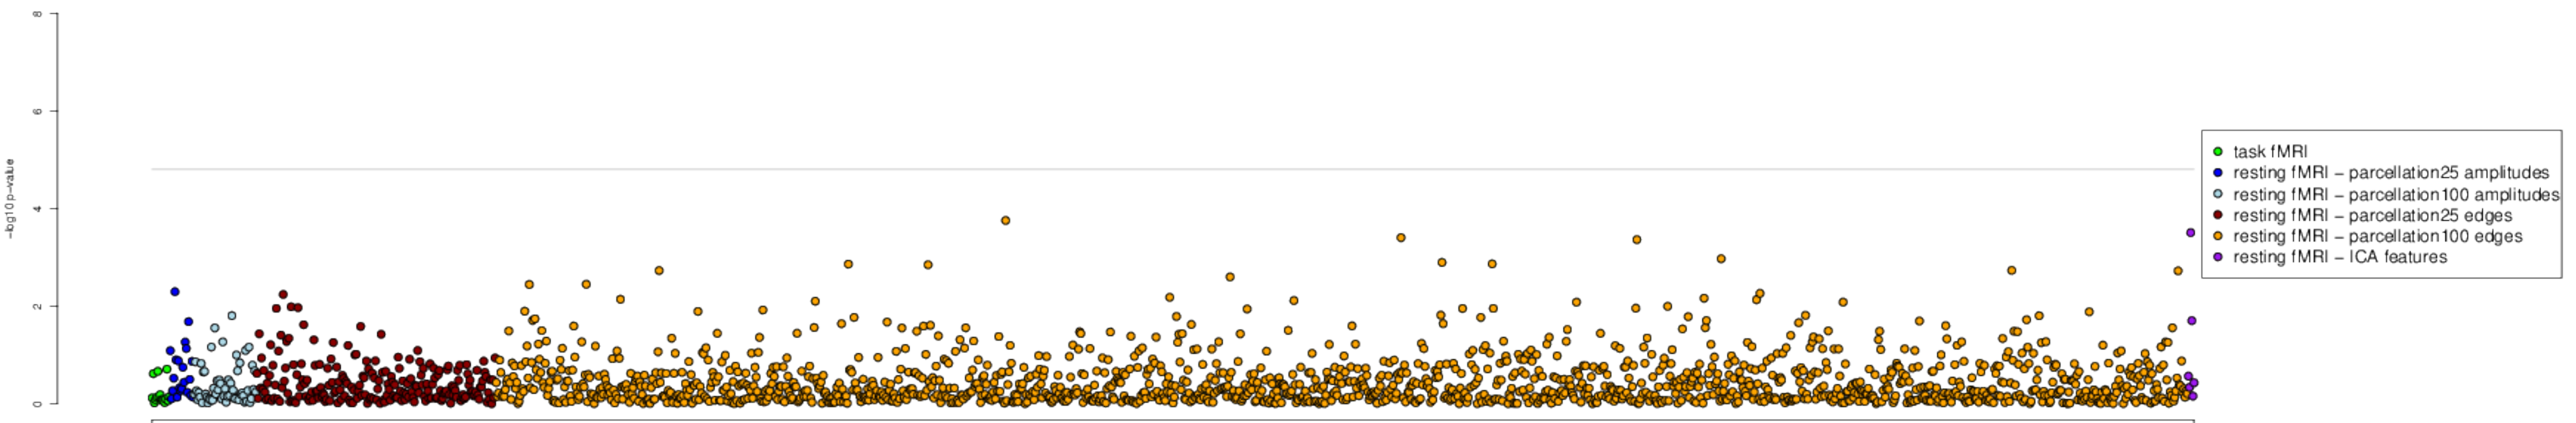

### Structural MRI

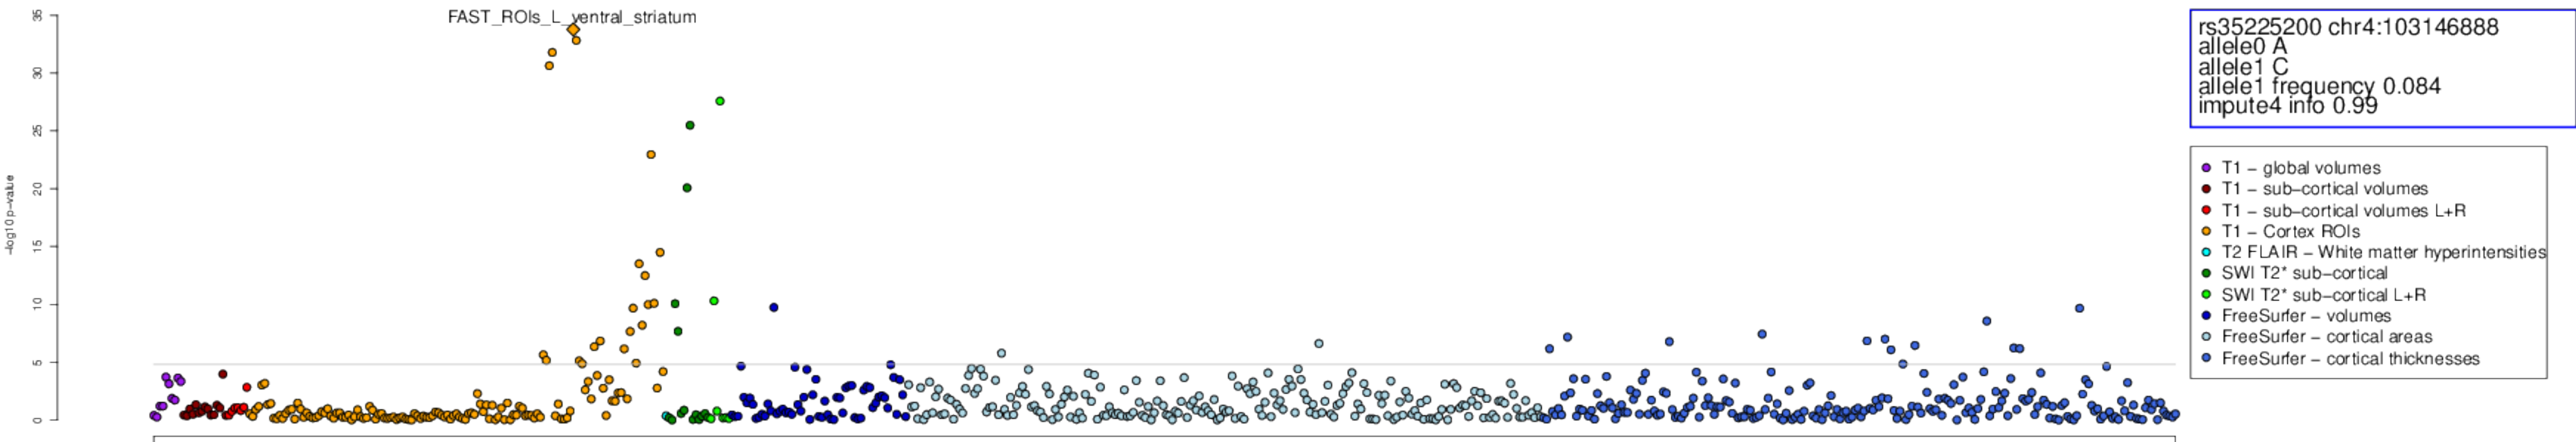

### Structural connectivity (Diffusion MRI)

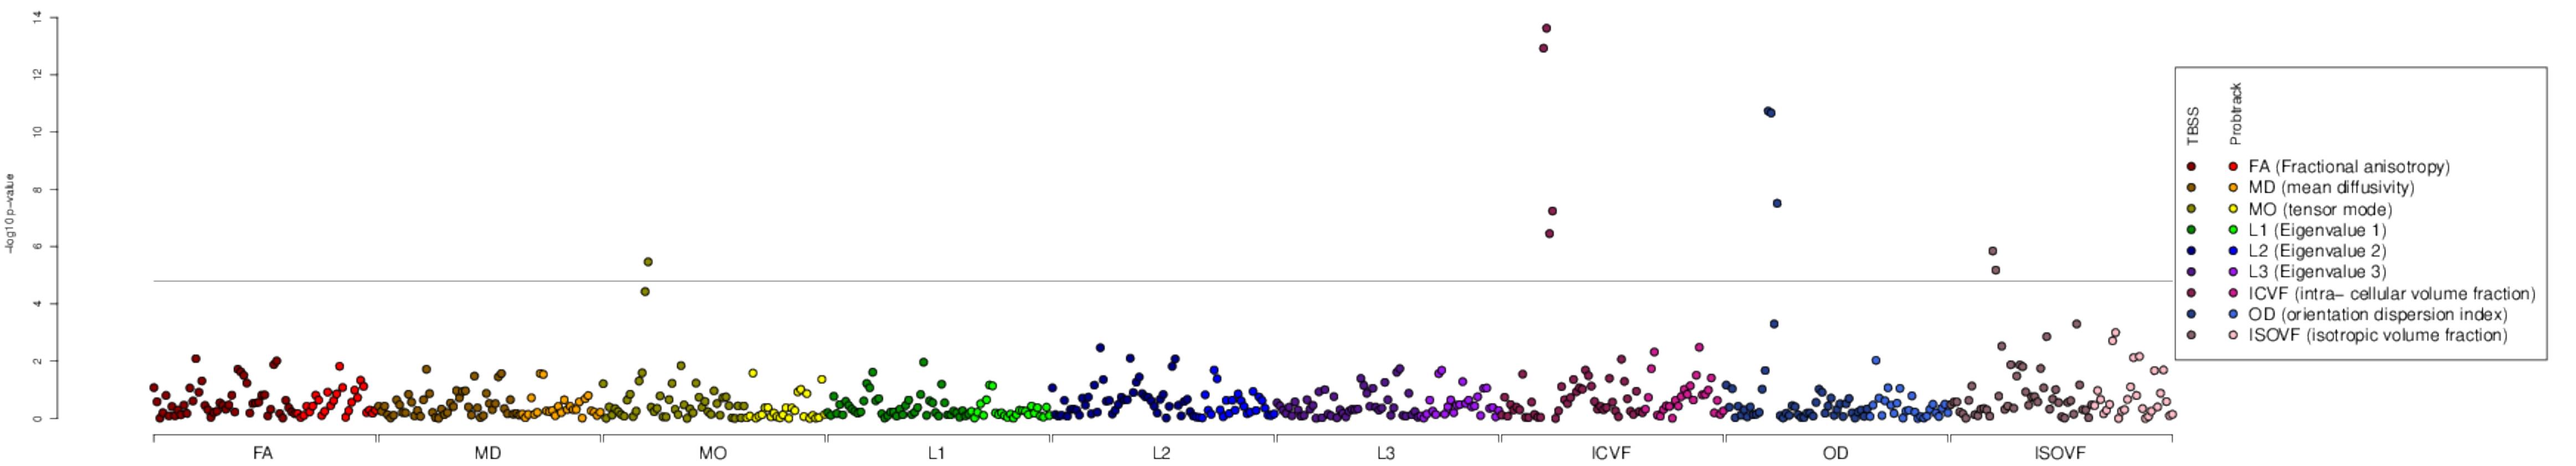

### functional MRI

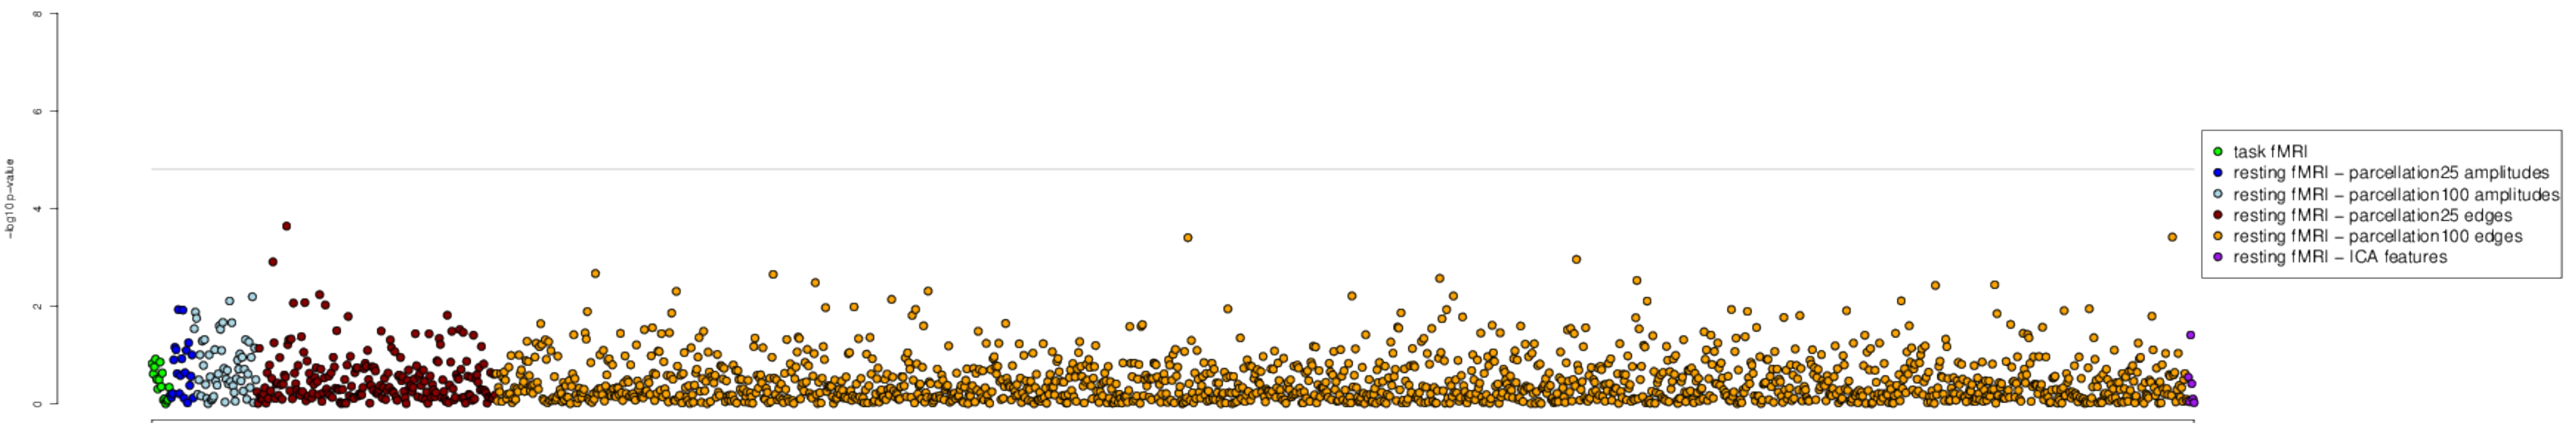

### Structural MRI

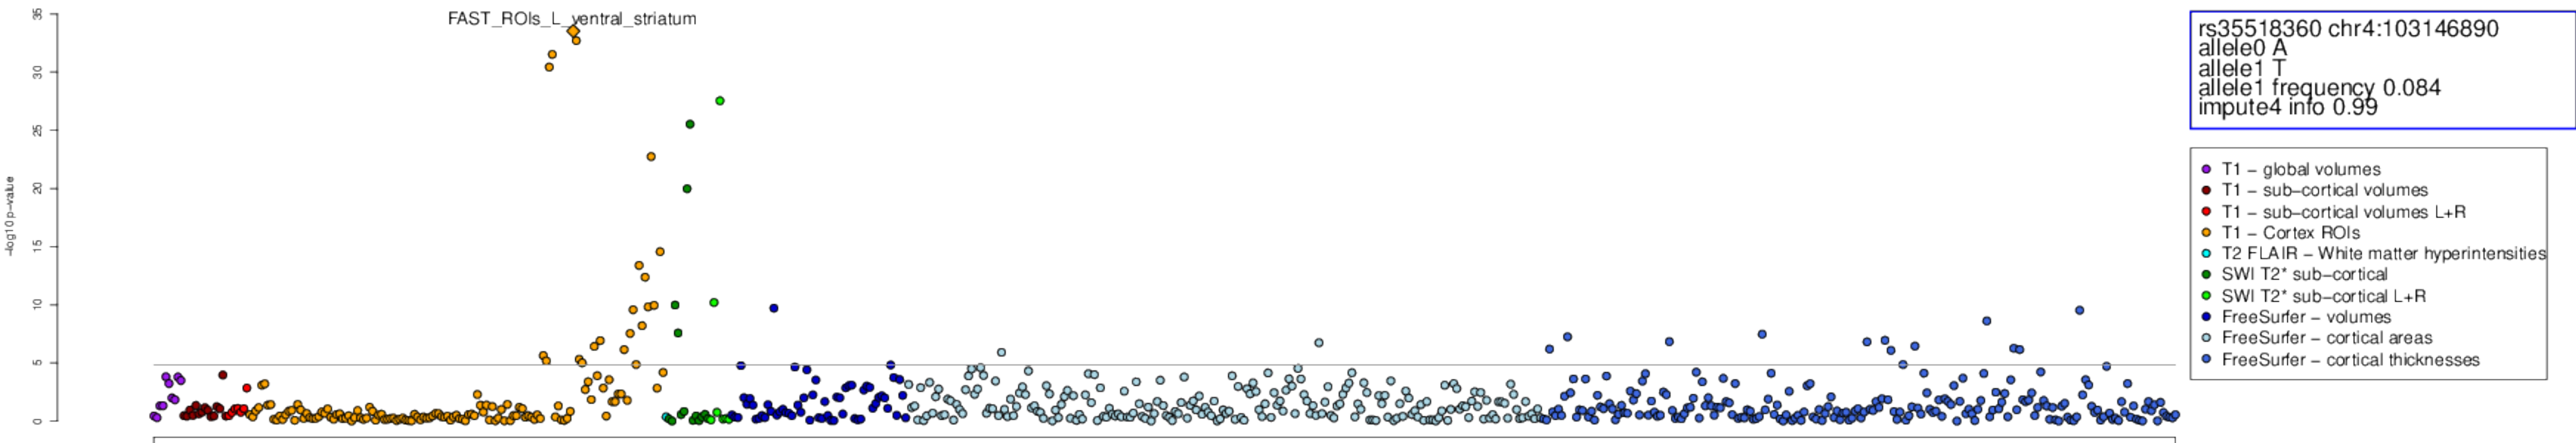

### Structural connectivity (Diffusion MRI)

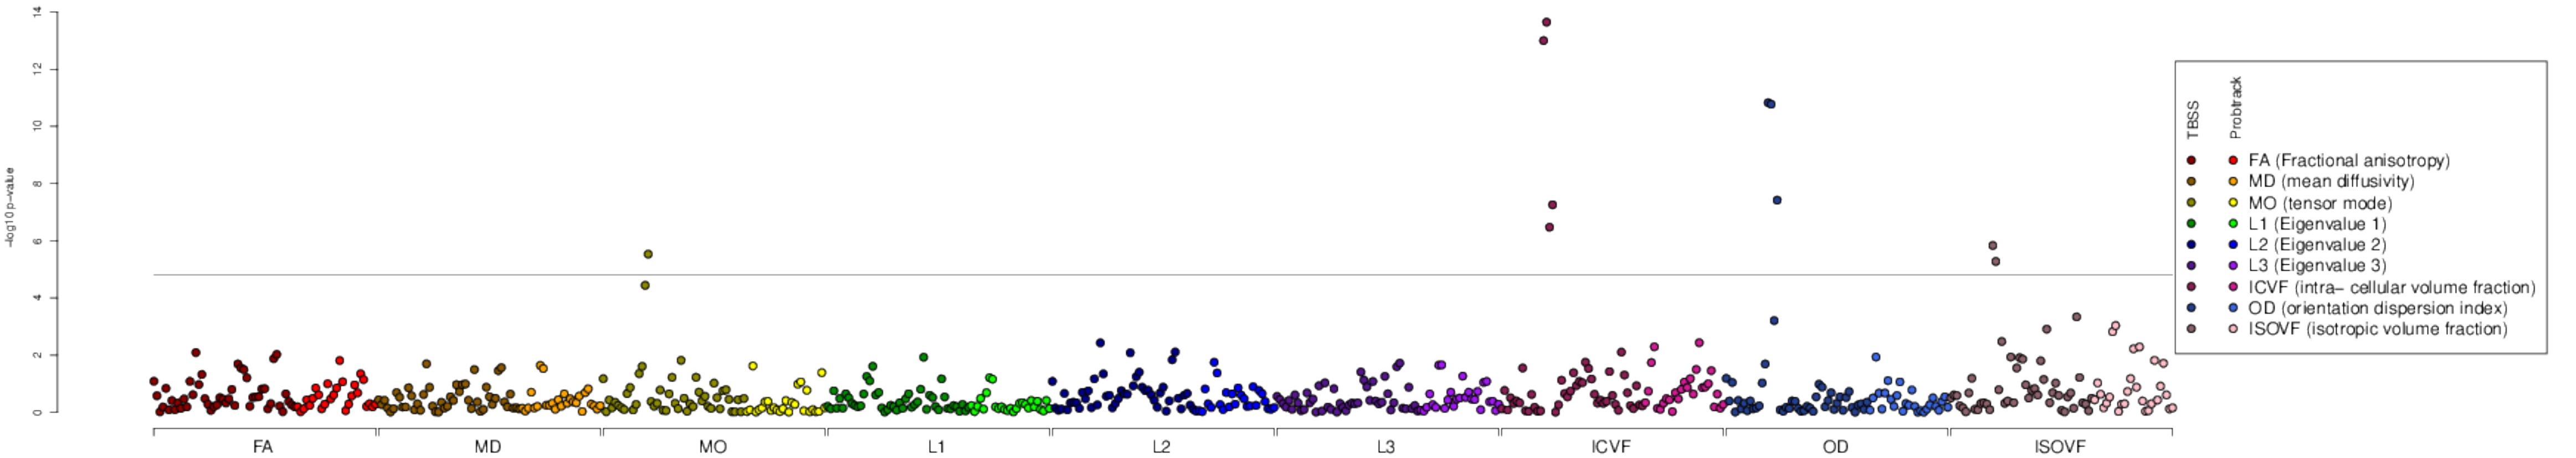

### functional MRI

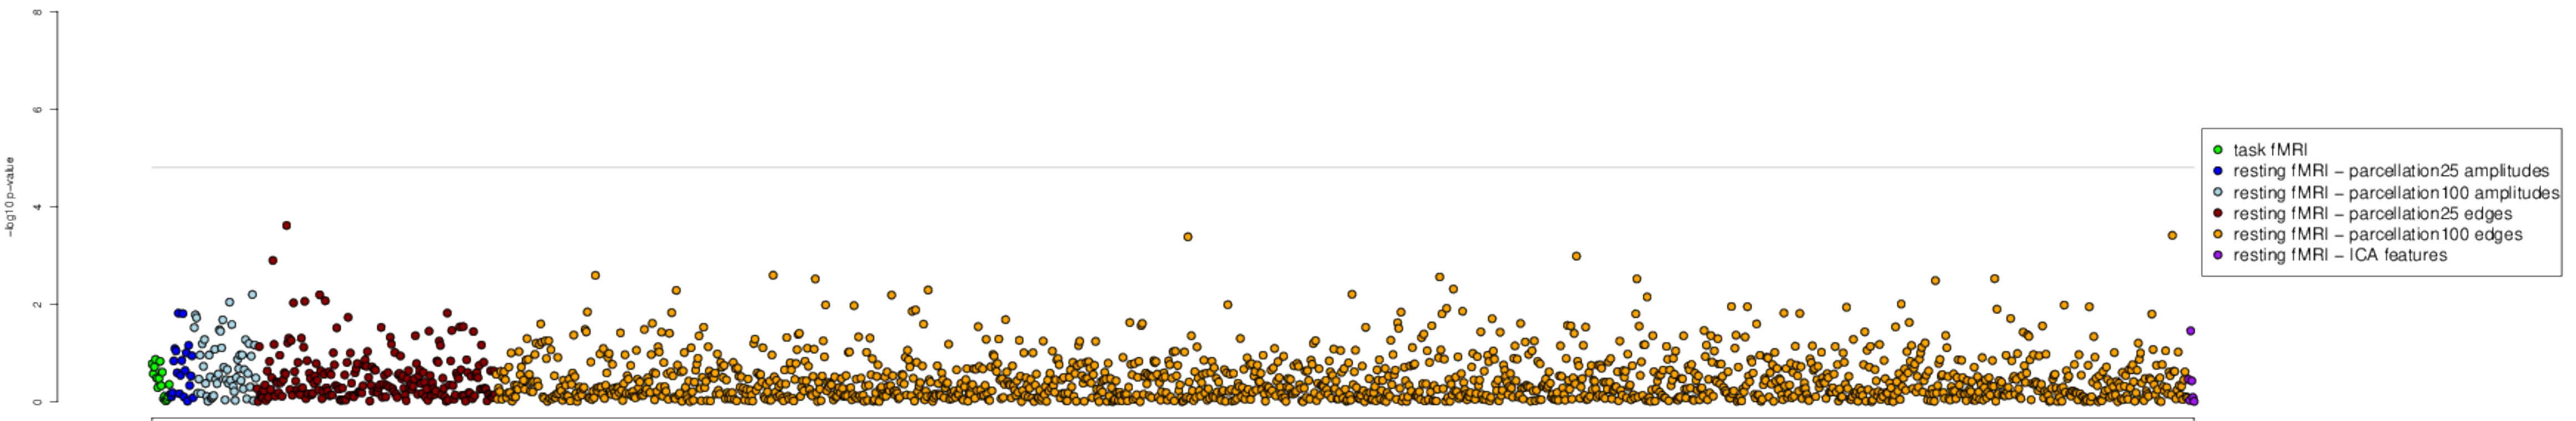



### Structural MRI

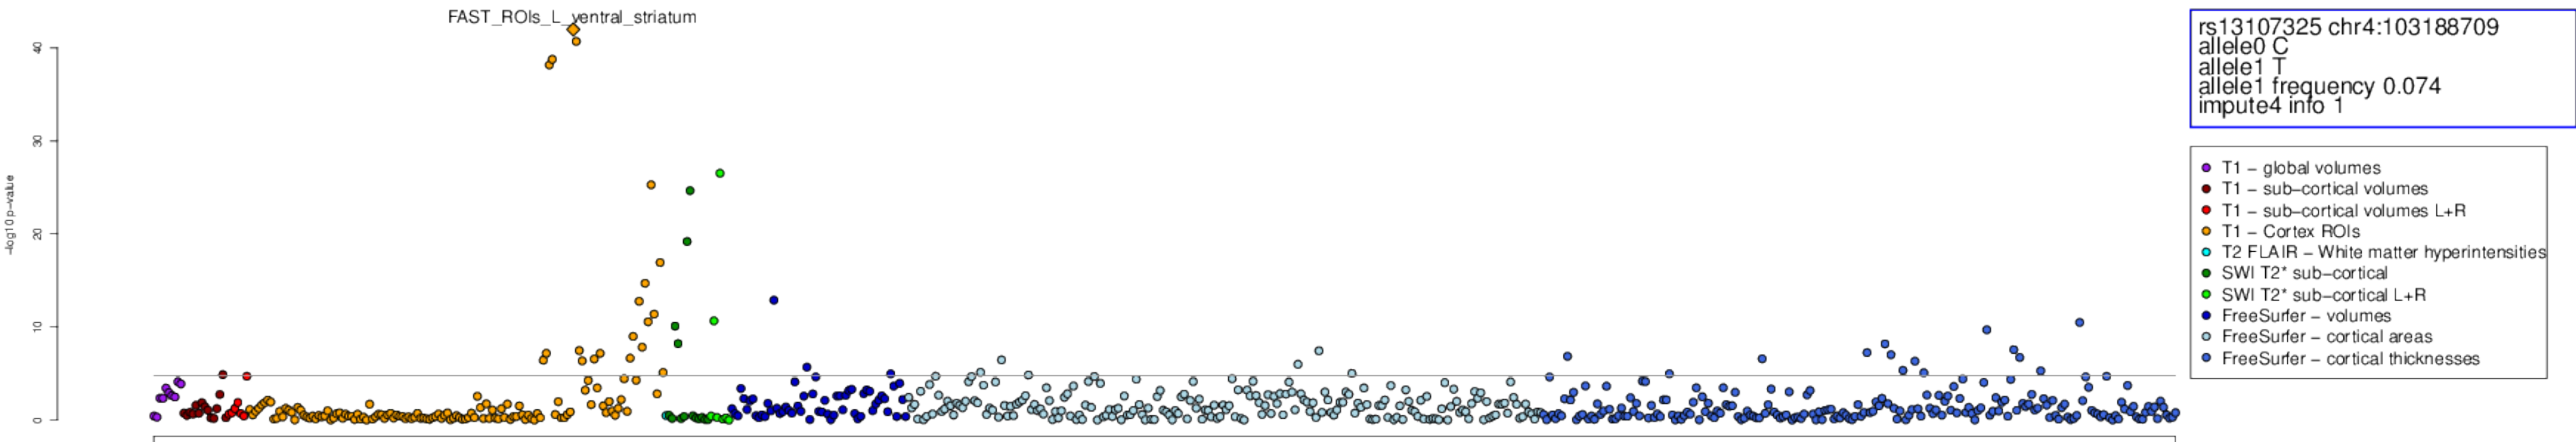

### Structural connectivity (Diffusion MRI)

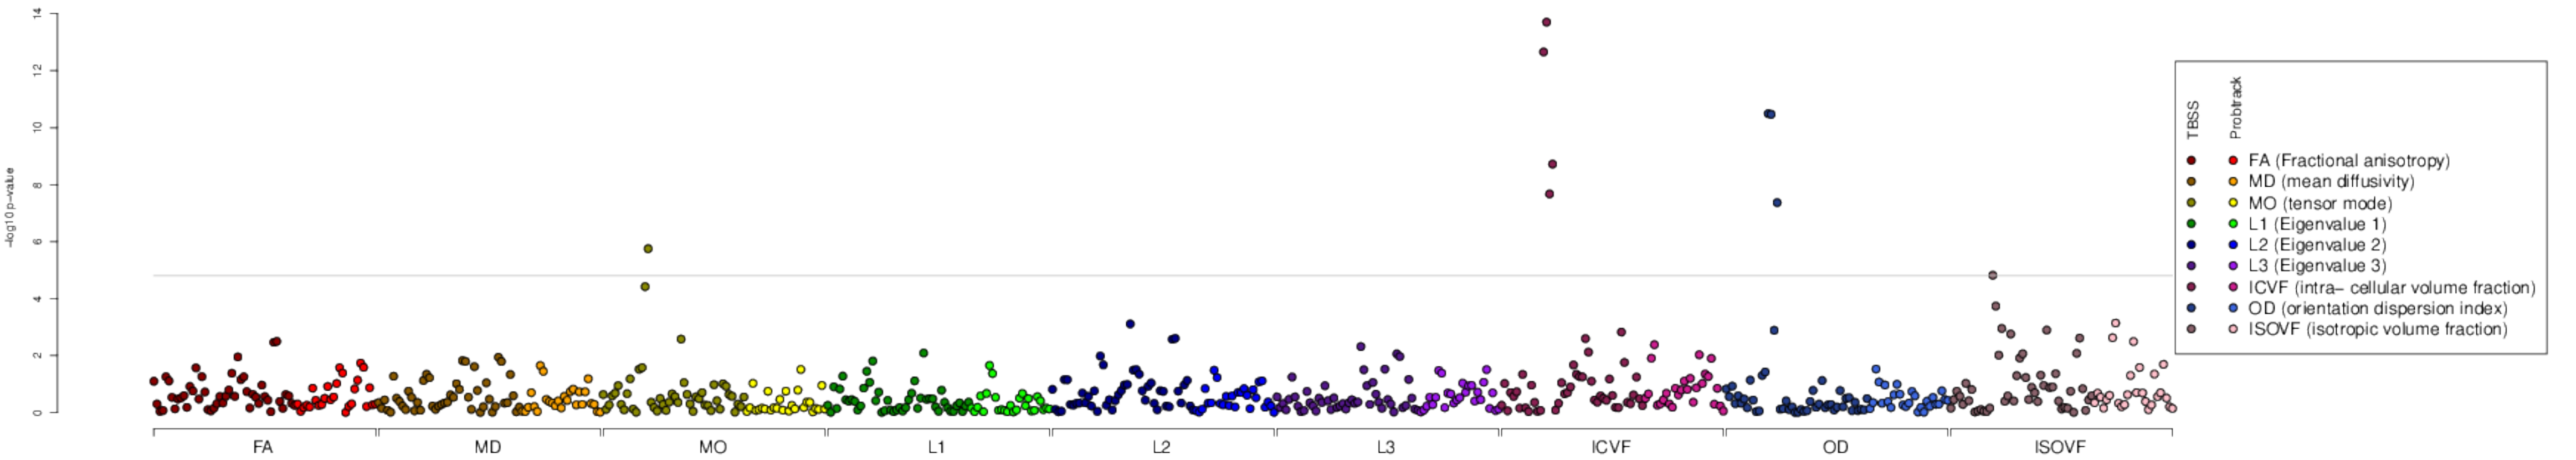

### functional MRI

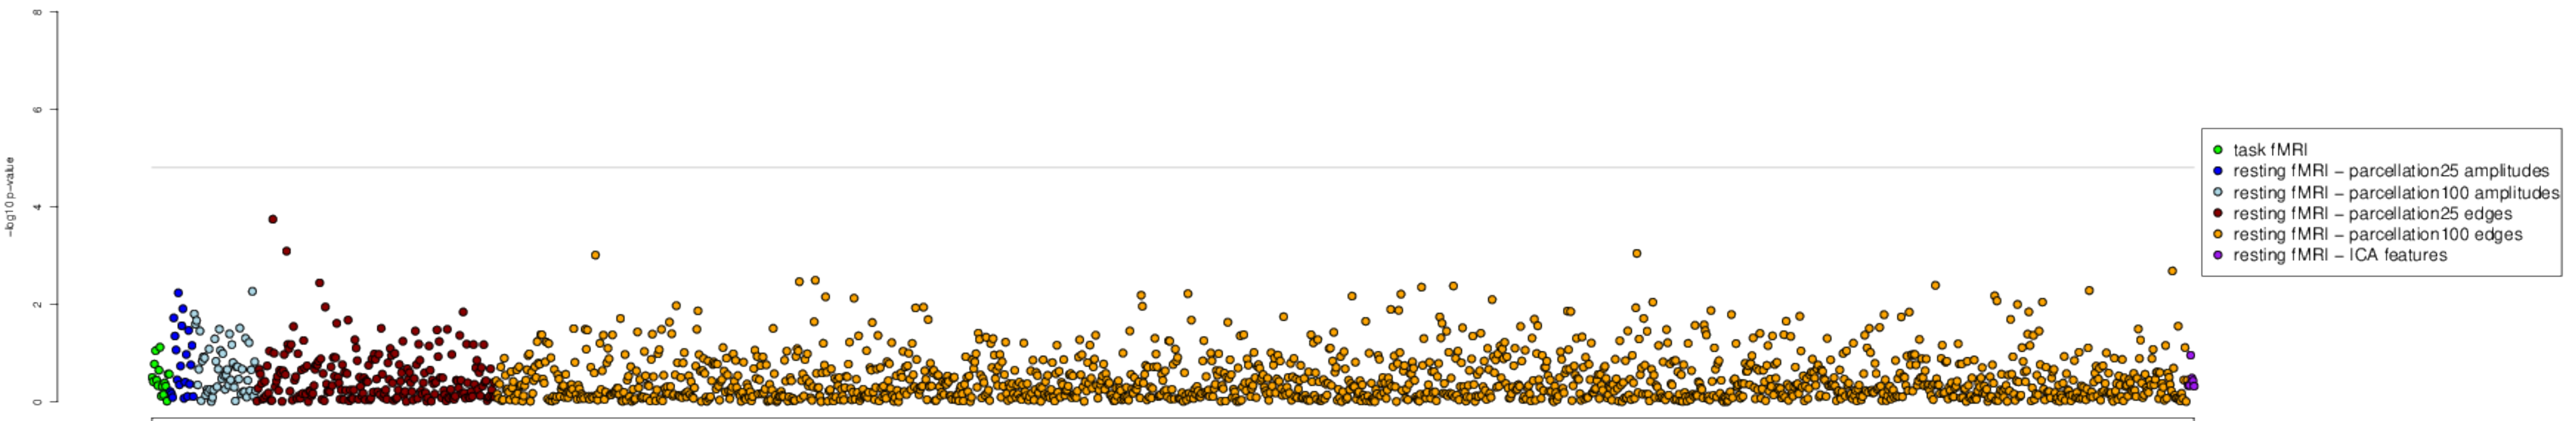

### Structural MRI

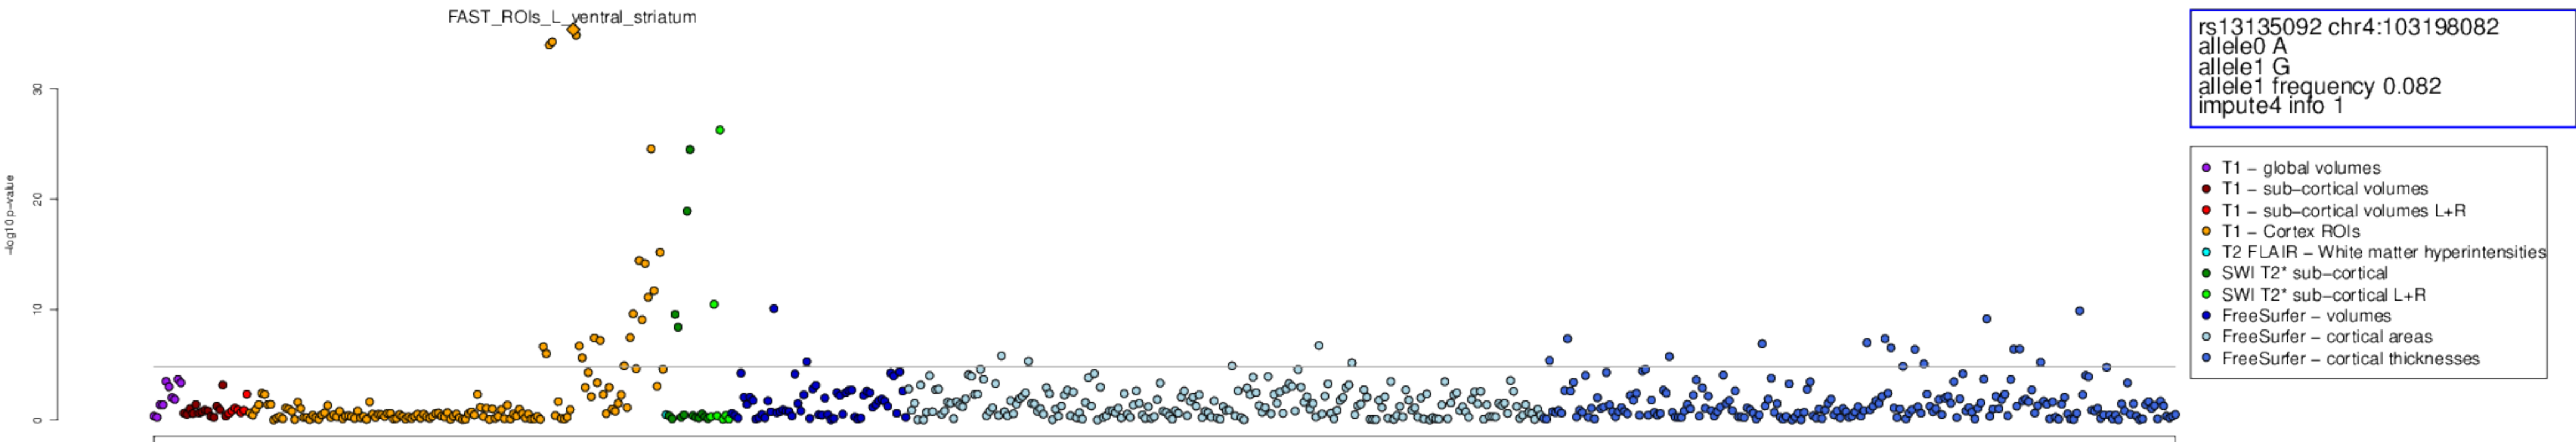

### Structural connectivity (Diffusion MRI)

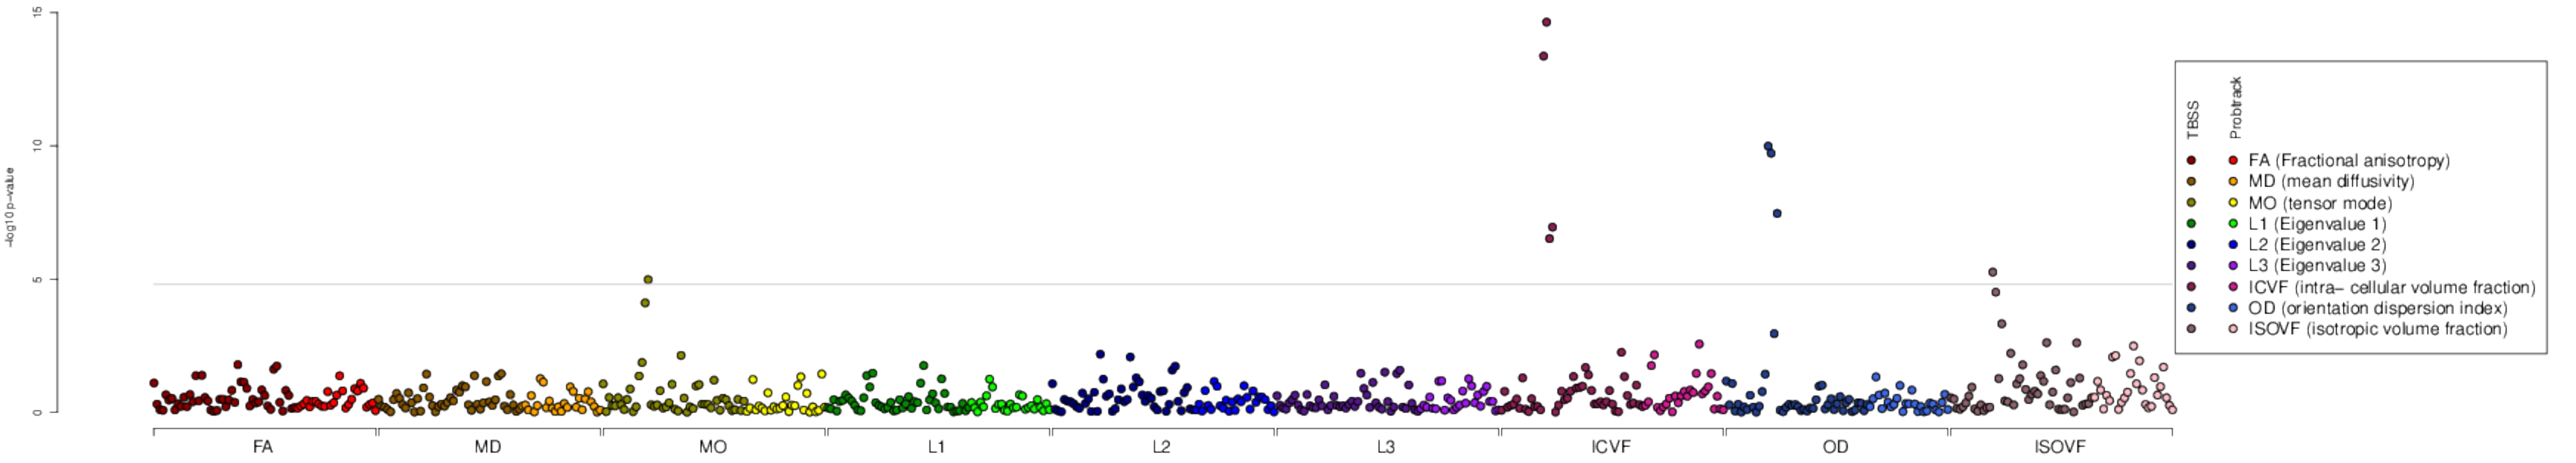

### functional MRI

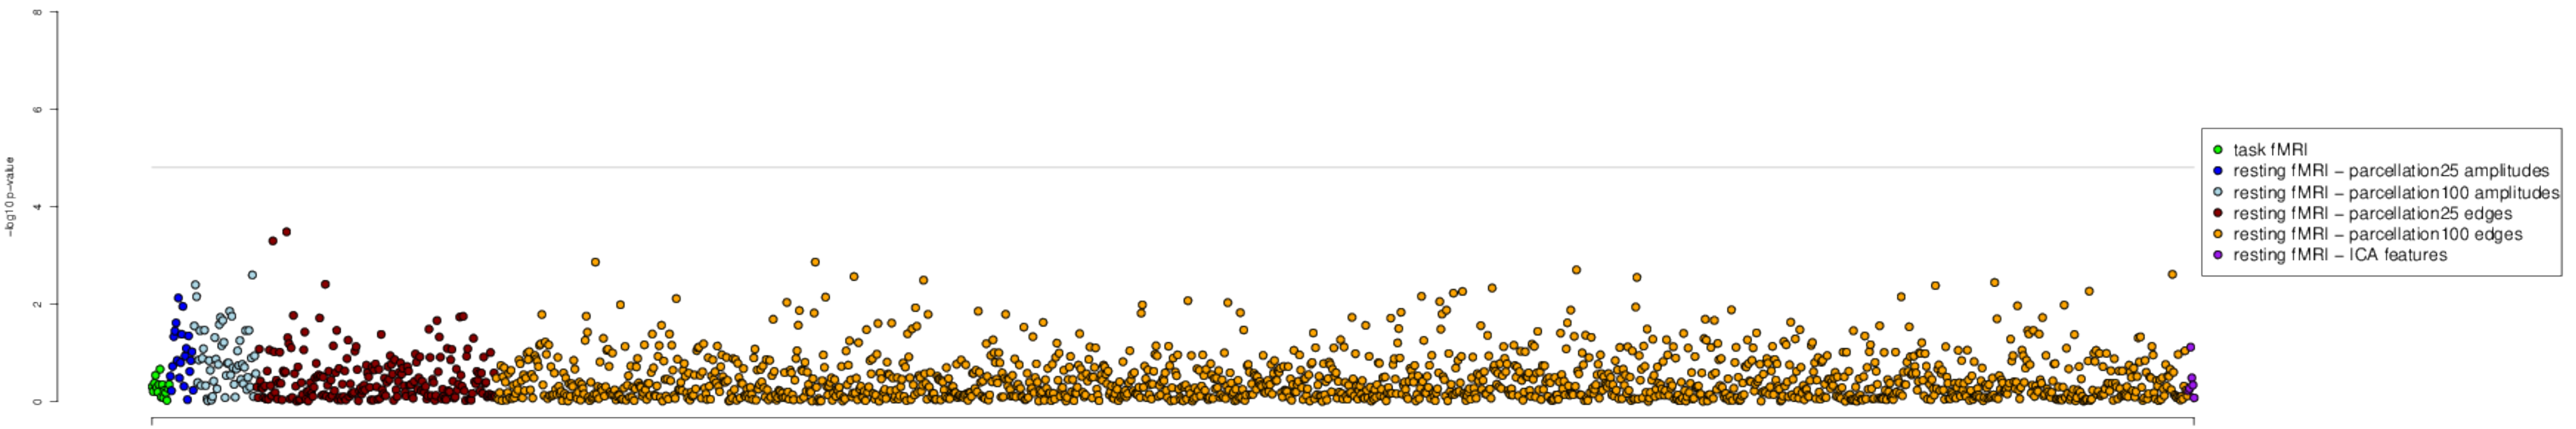

### Structural MRI

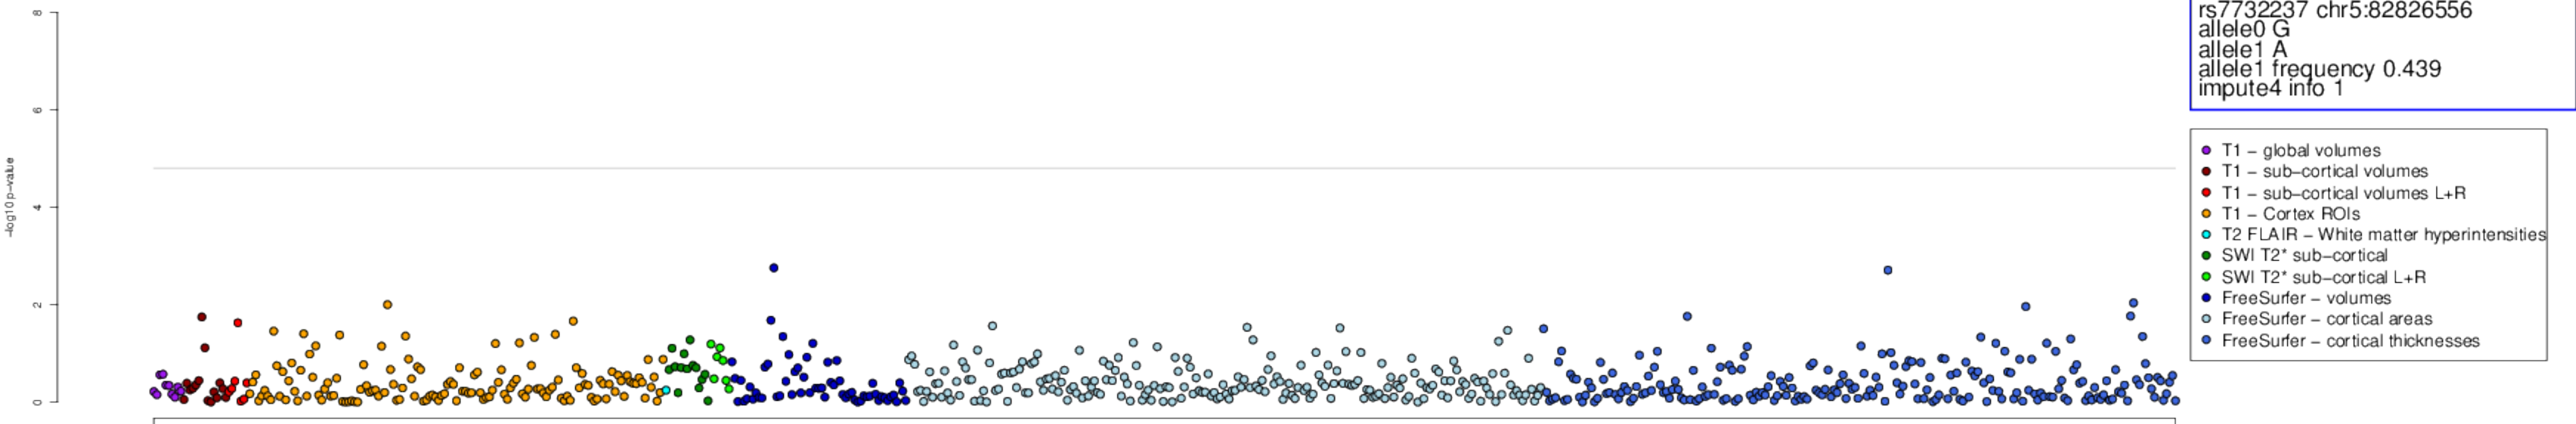

### Structural connectivity (Diffusion MRI)

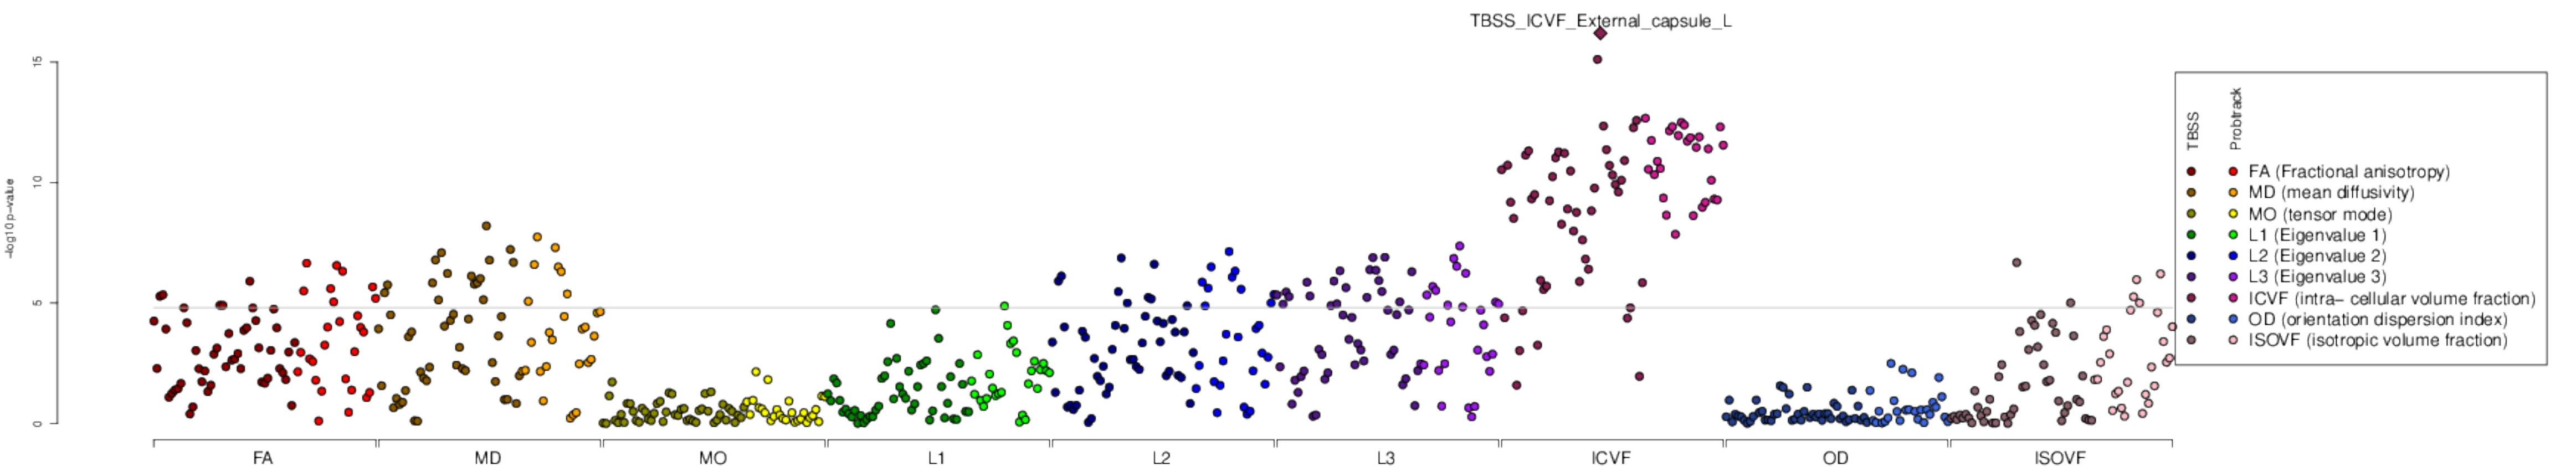

### functional MRI

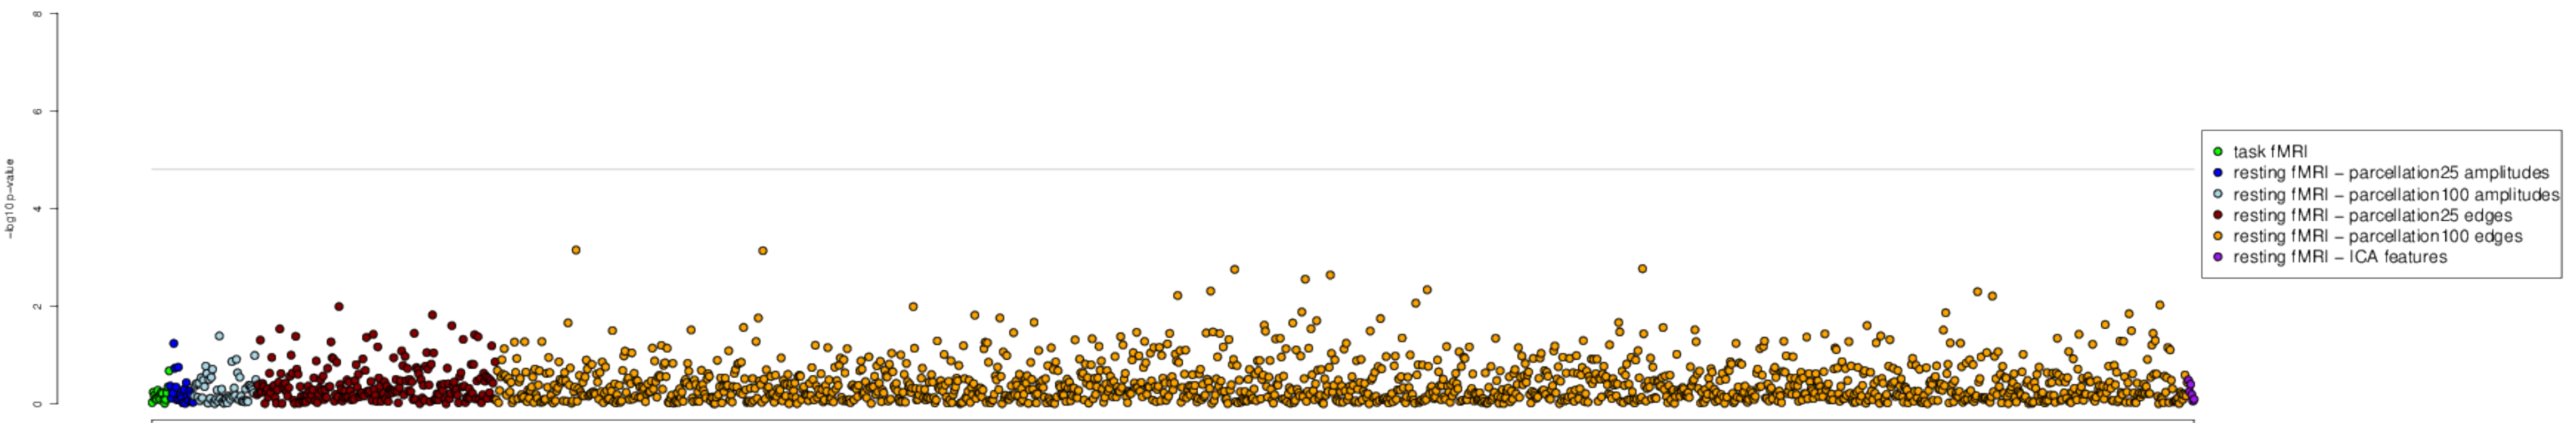

### Structural MRI

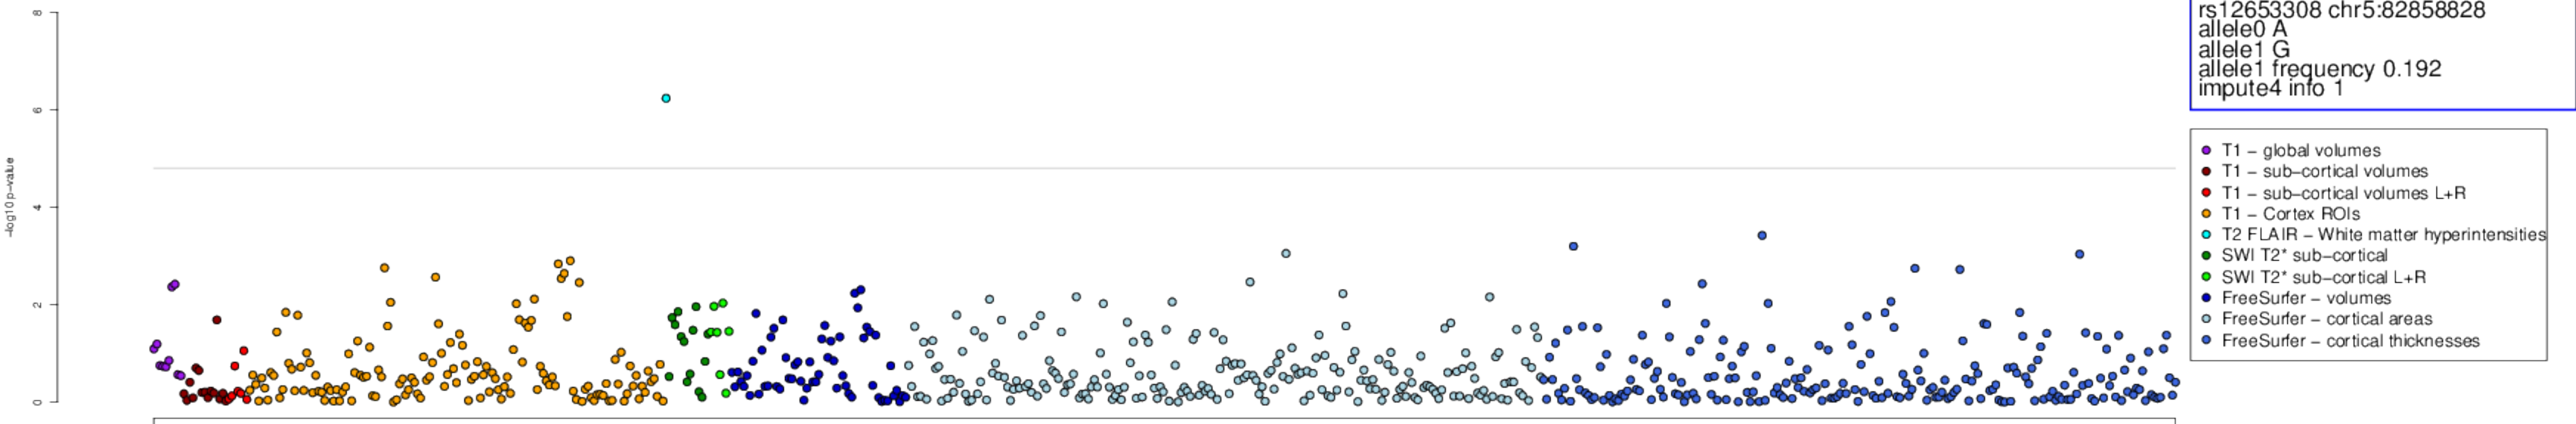

### Structural connectivity (Diffusion MRI)

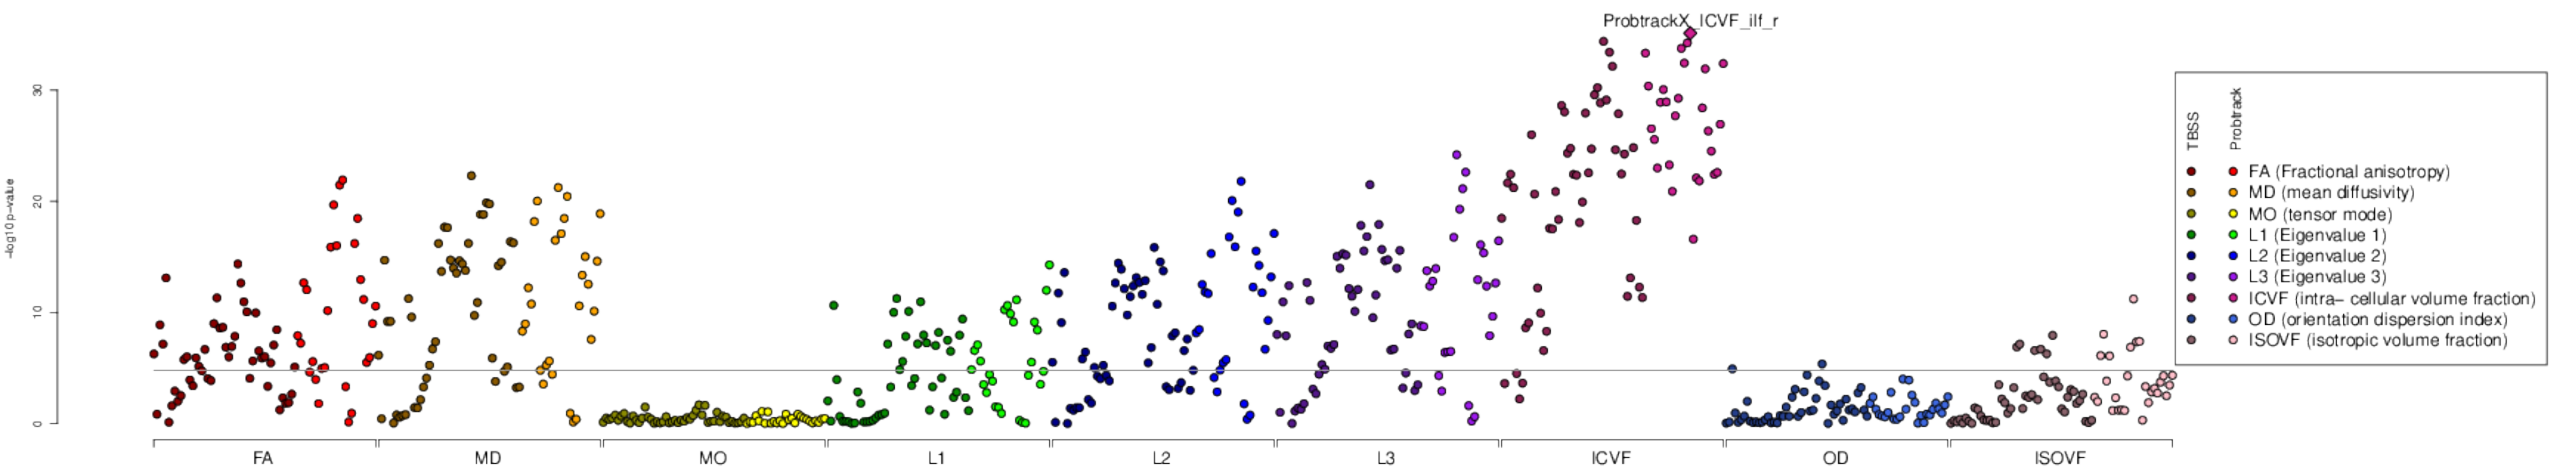

### functional MRI

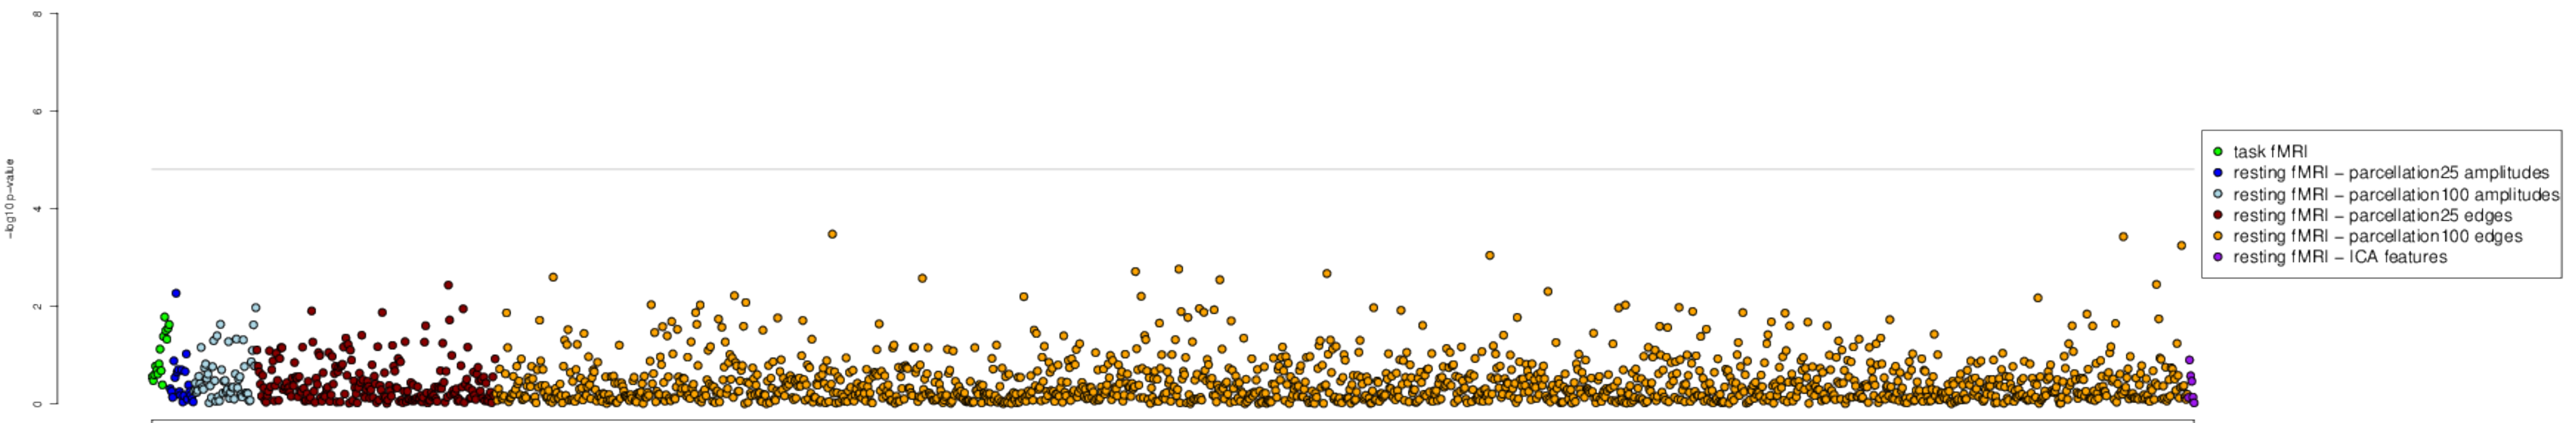

### Structural MRI

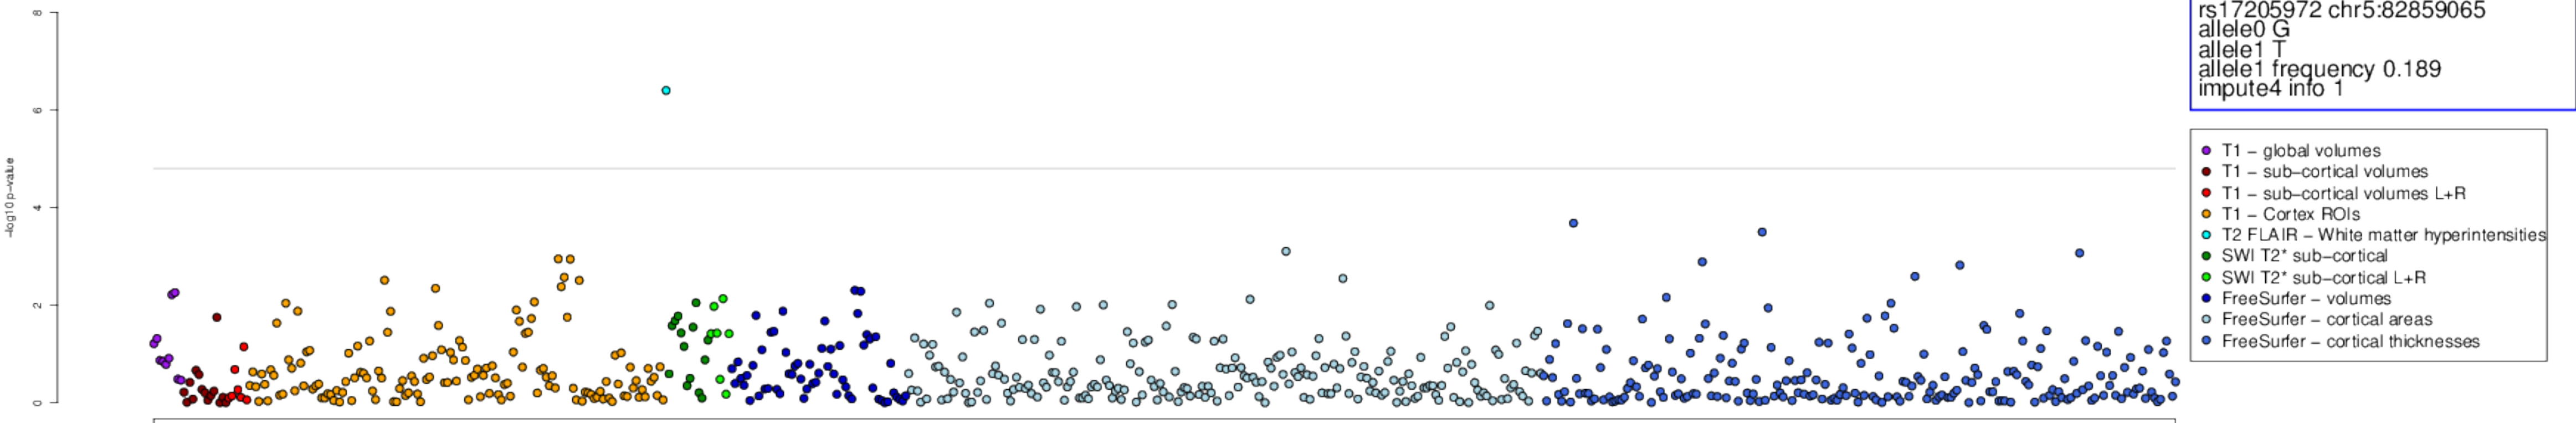

### Structural connectivity (Diffusion MRI)

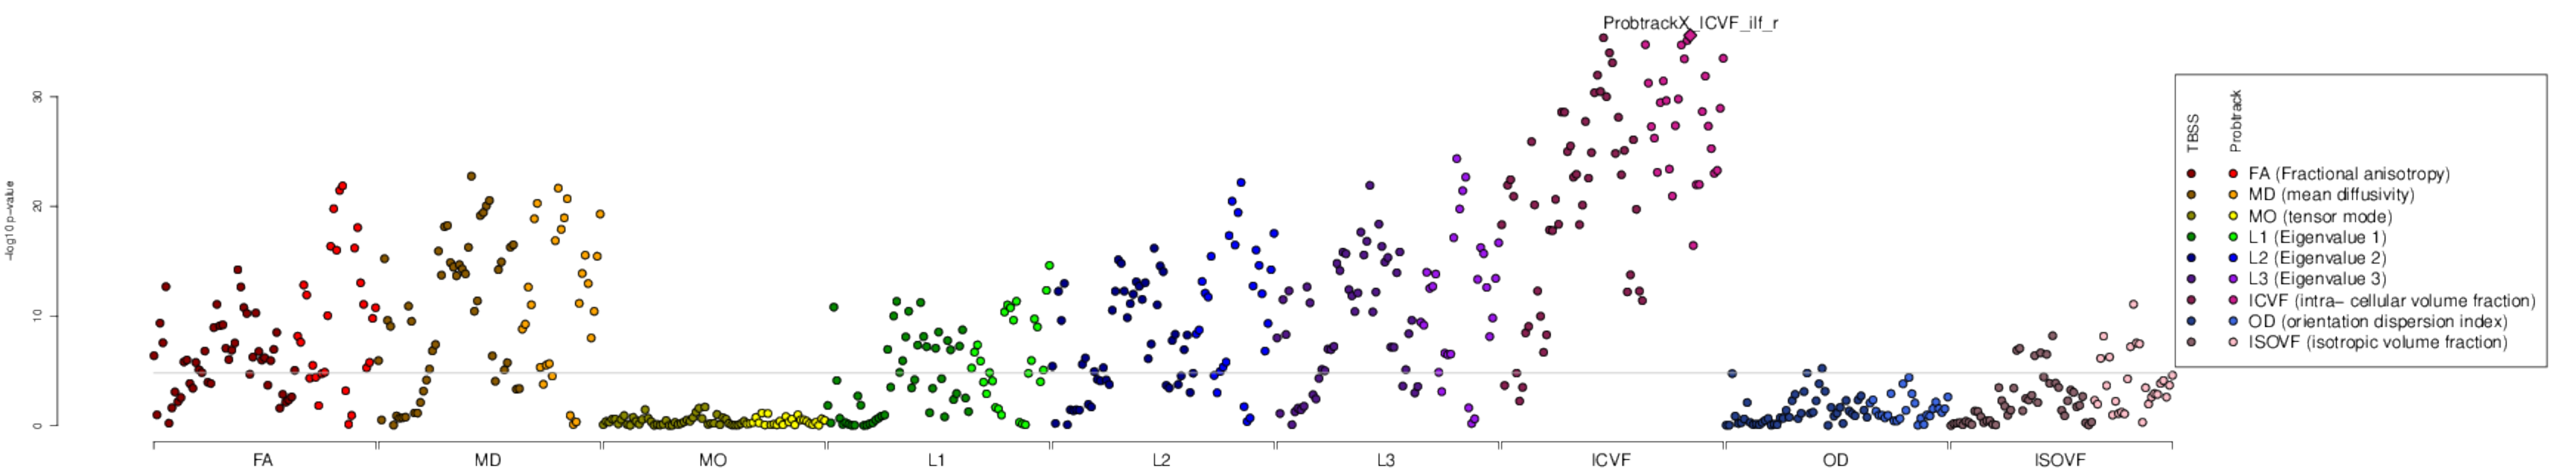

### functional MRI

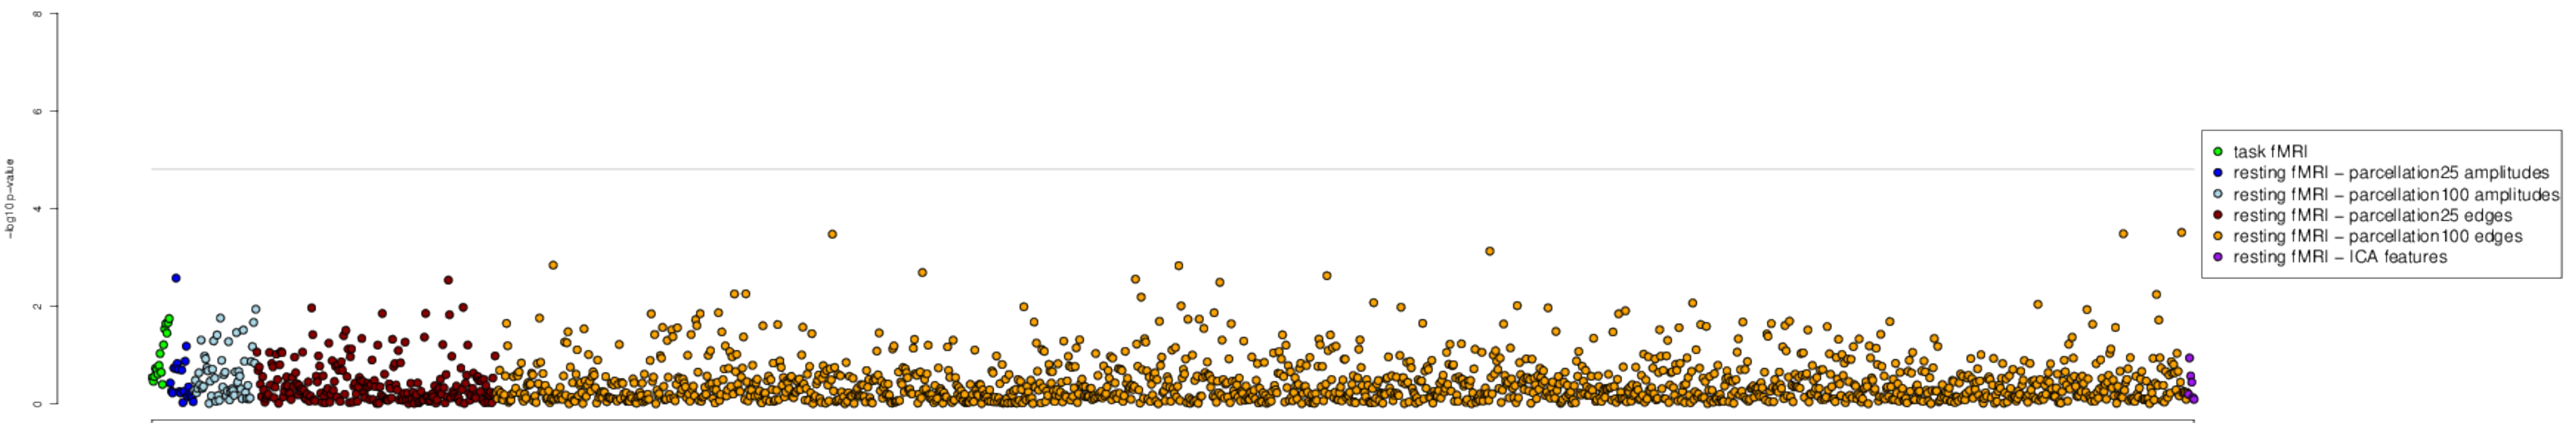

### Structural MRI

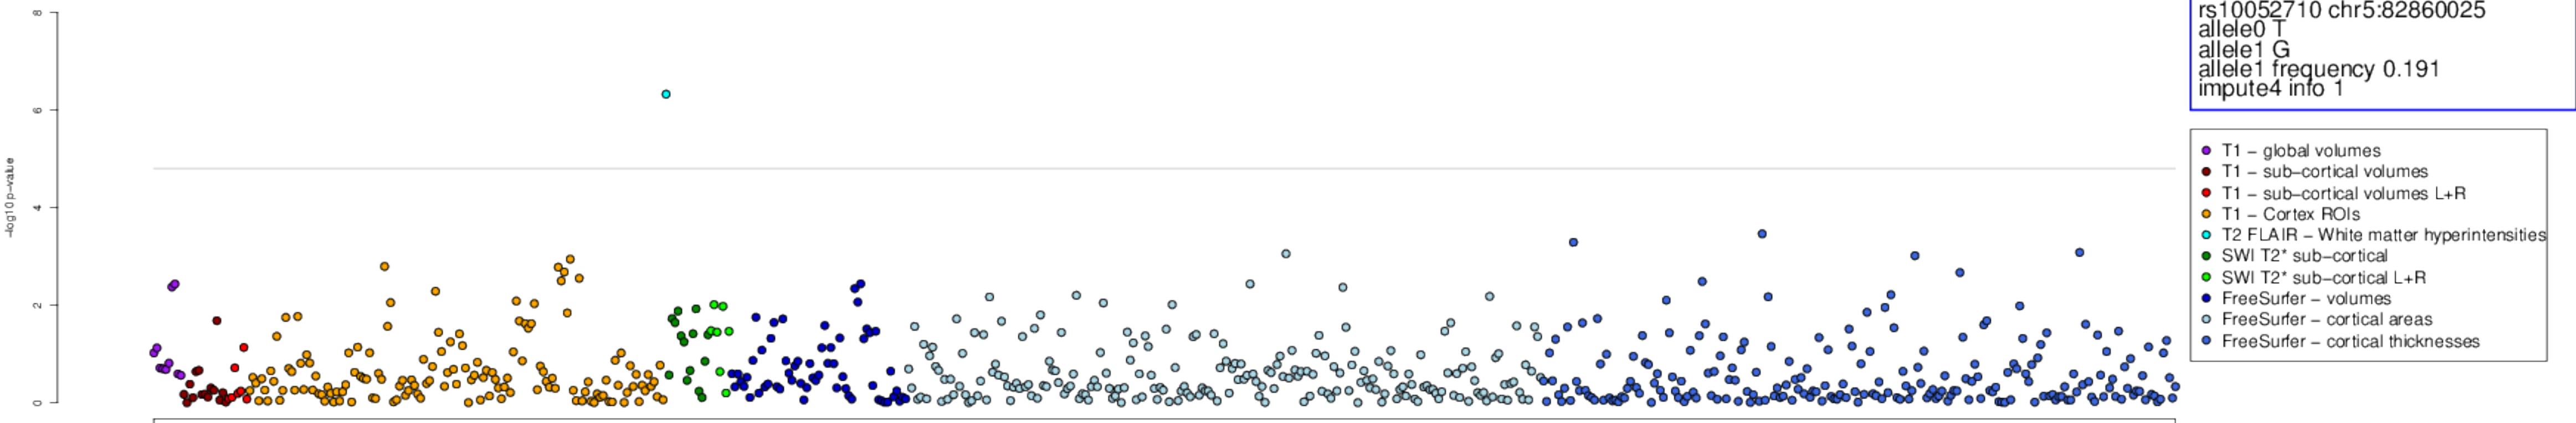

### Structural connectivity (Diffusion MRI)

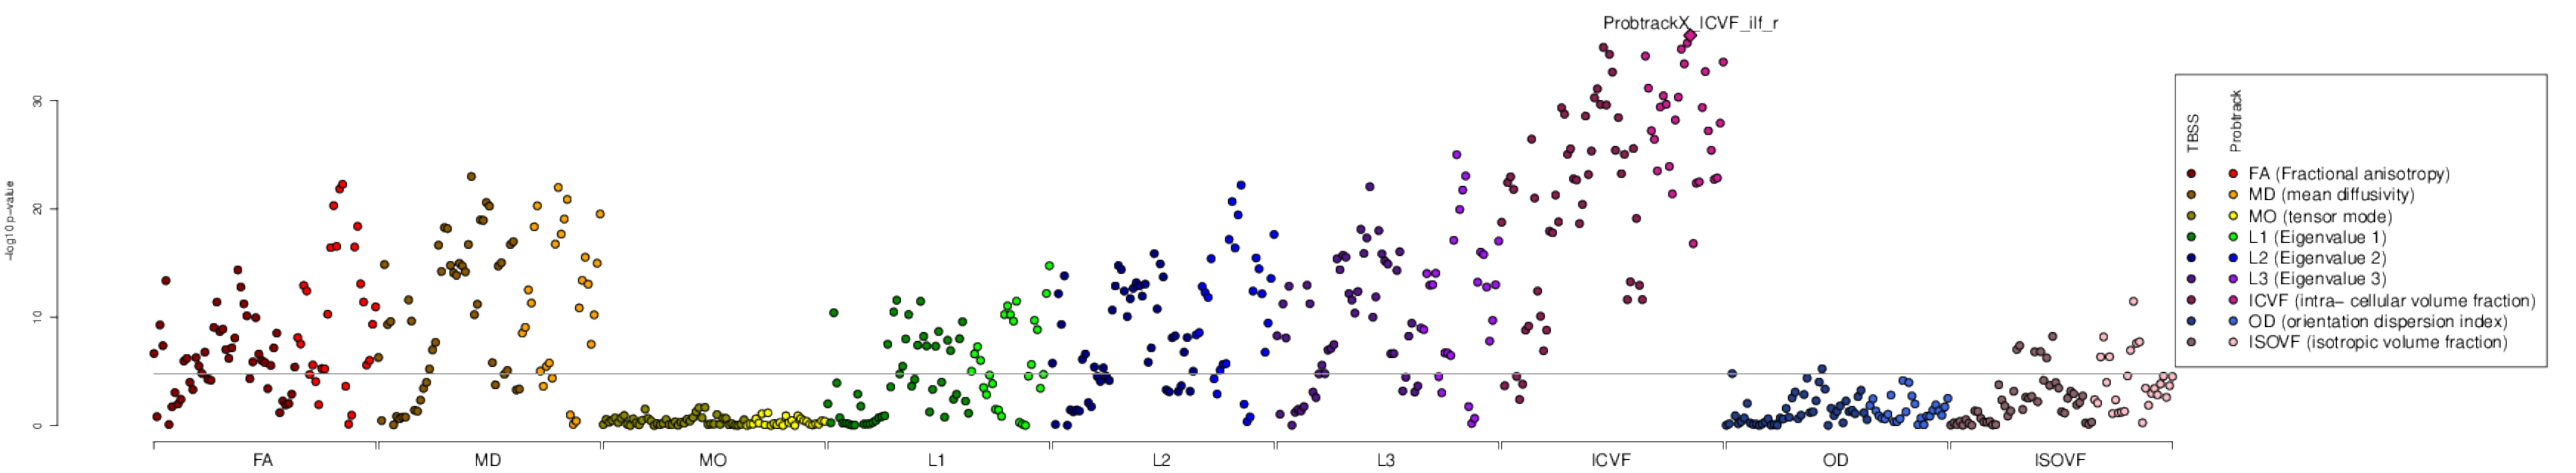

### functional MRI

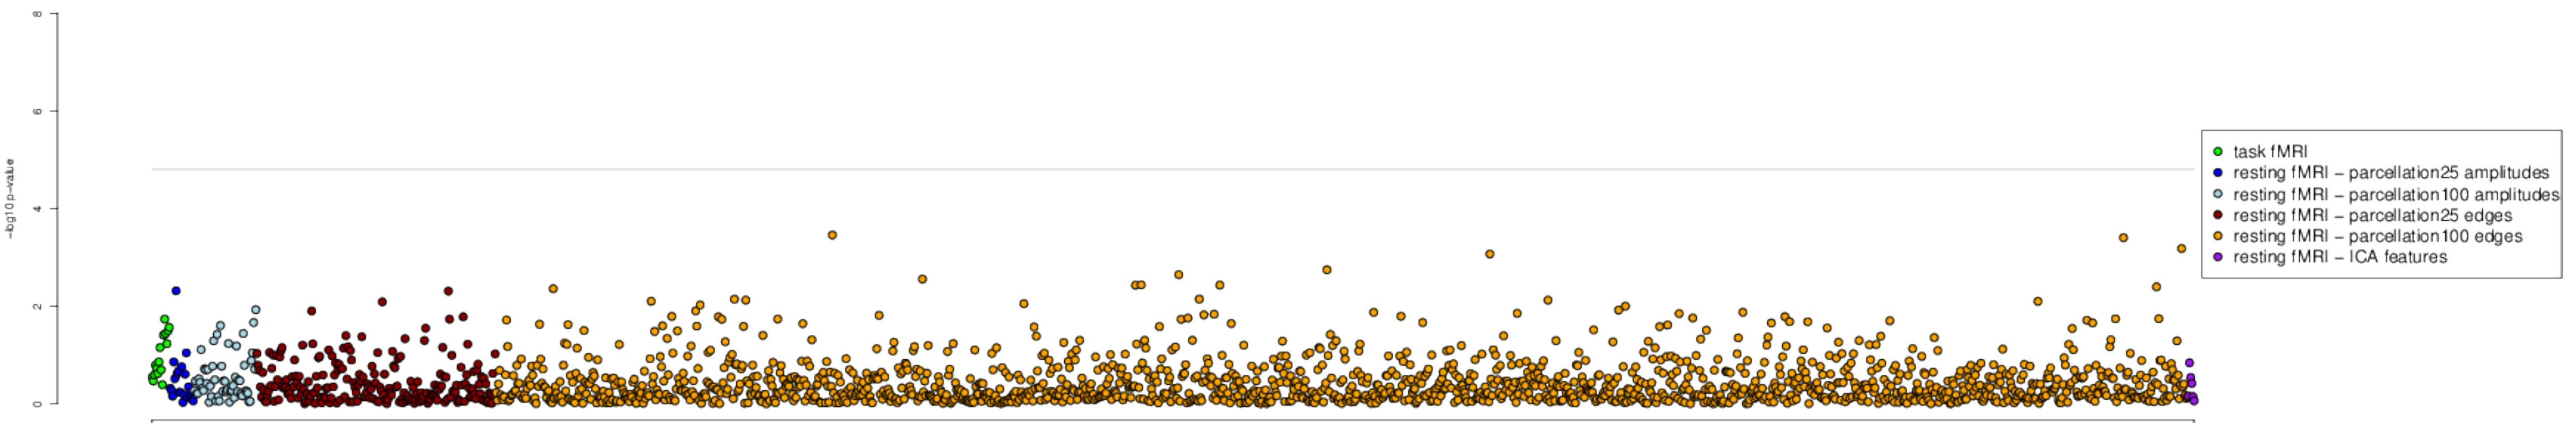

### Structural MRI

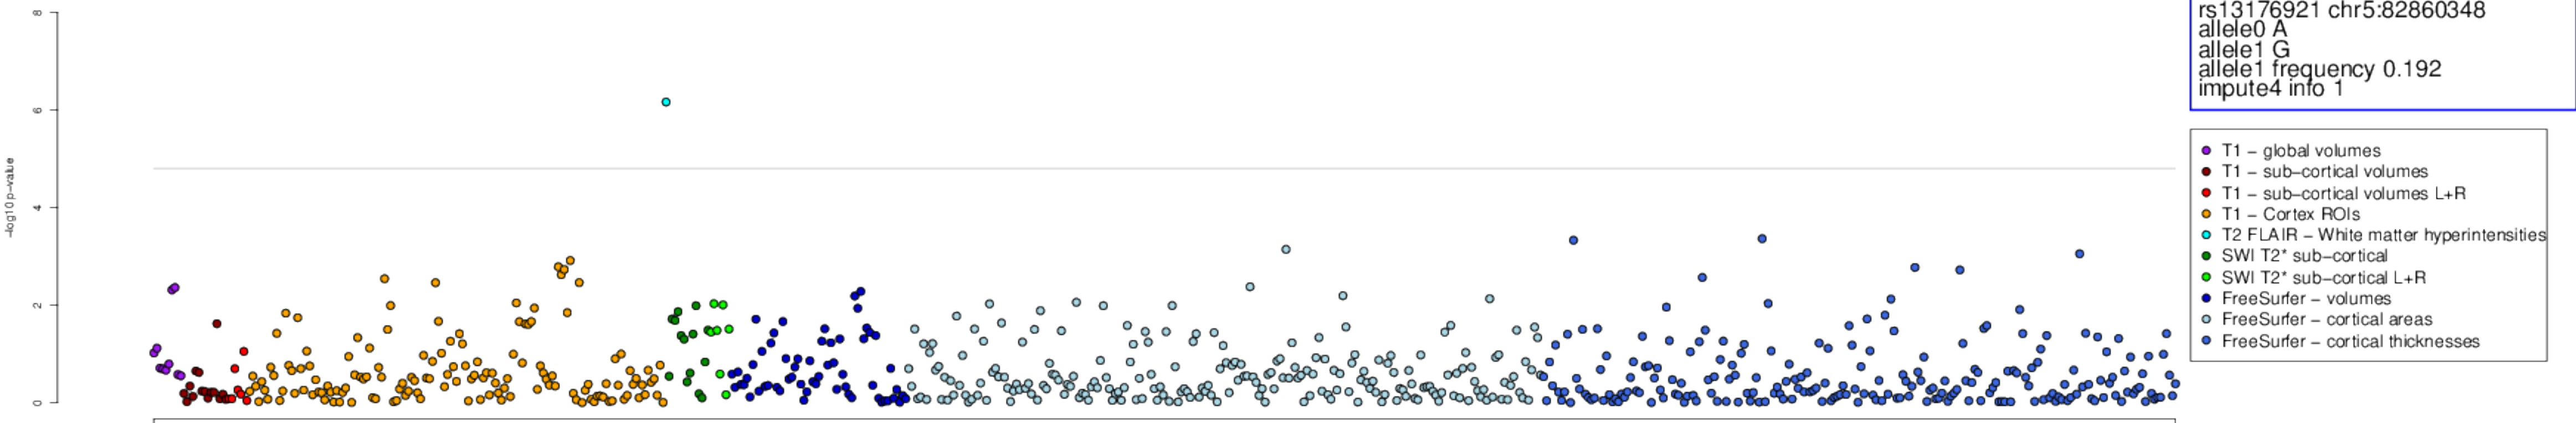

### Structural connectivity (Diffusion MRI)

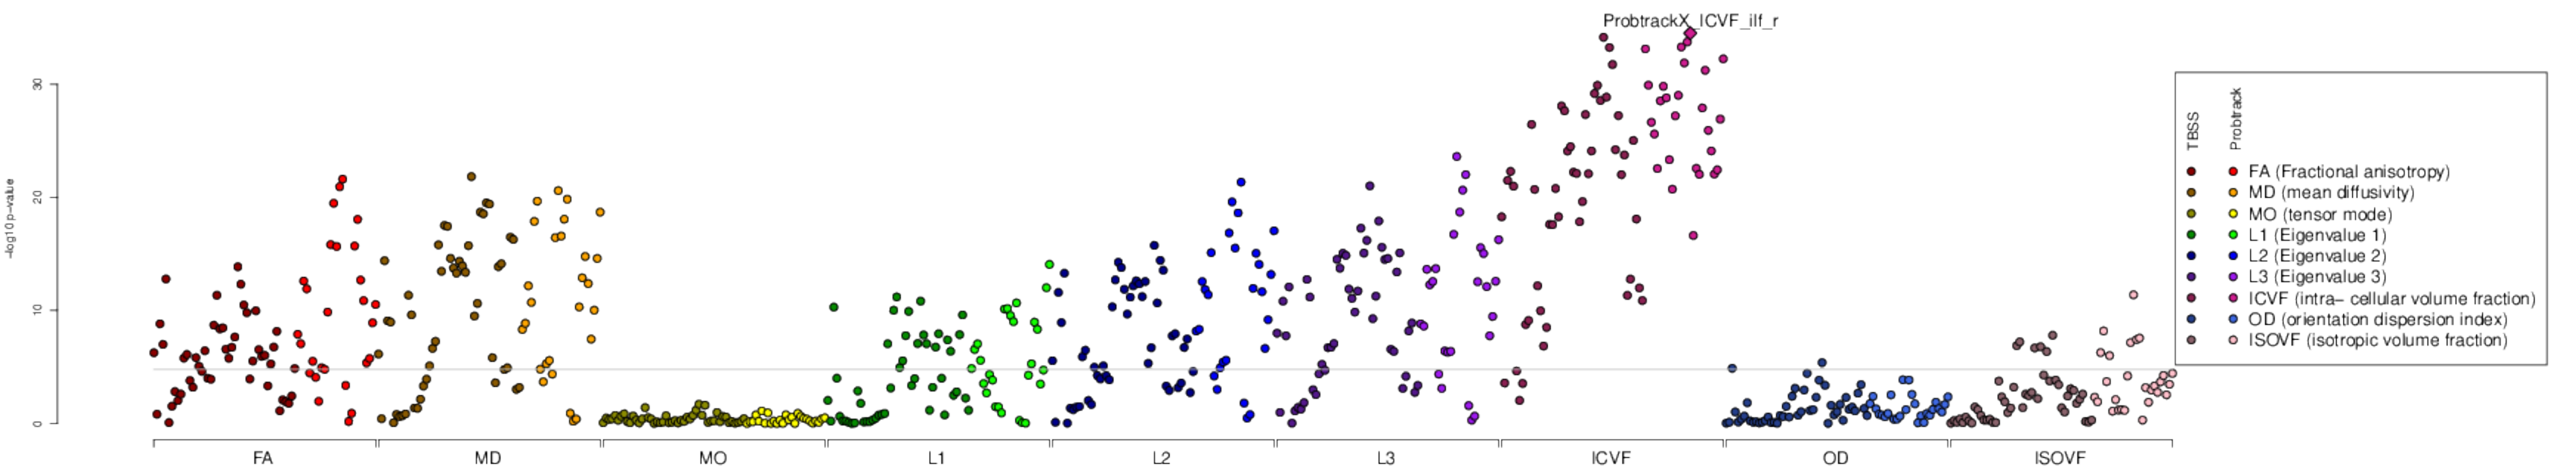

### functional MRI

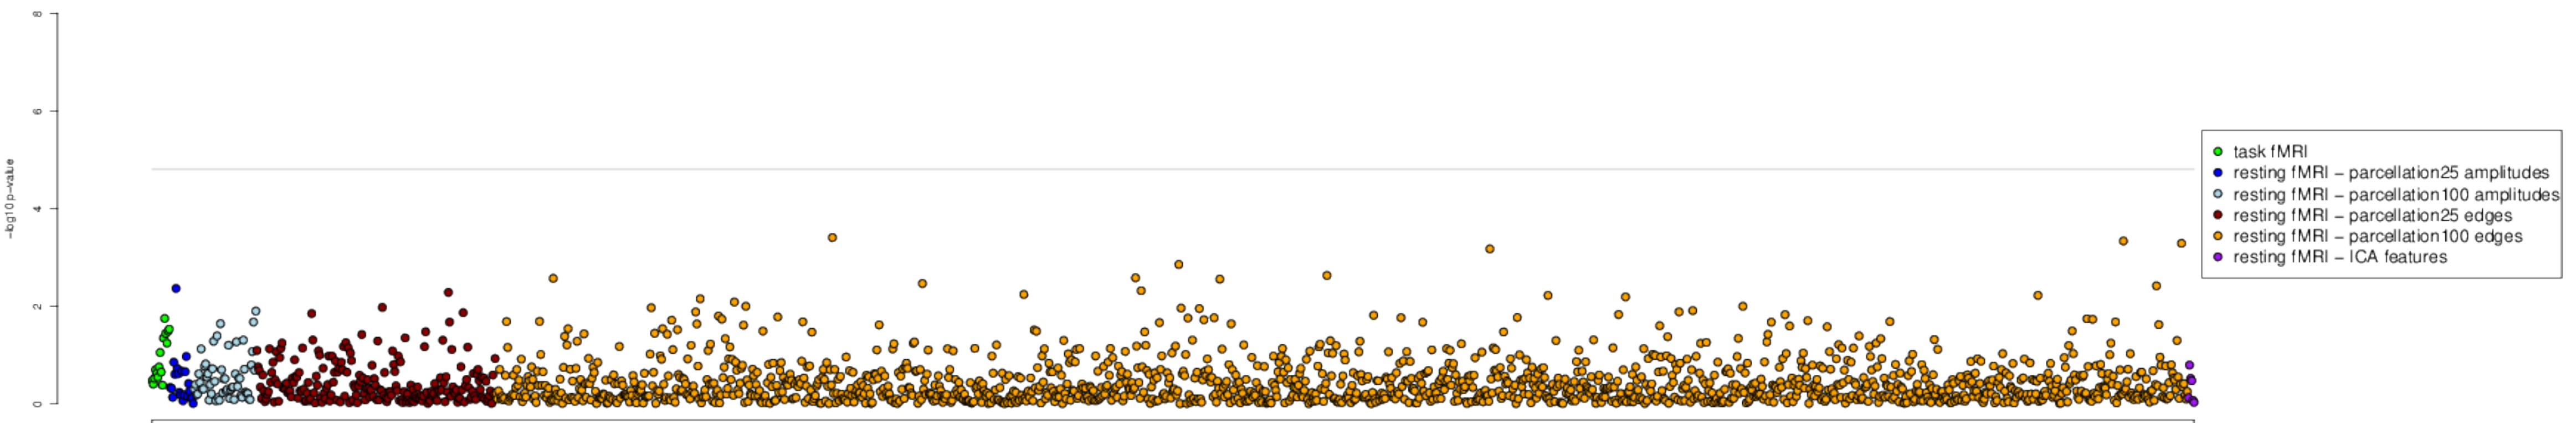

### Structural MRI

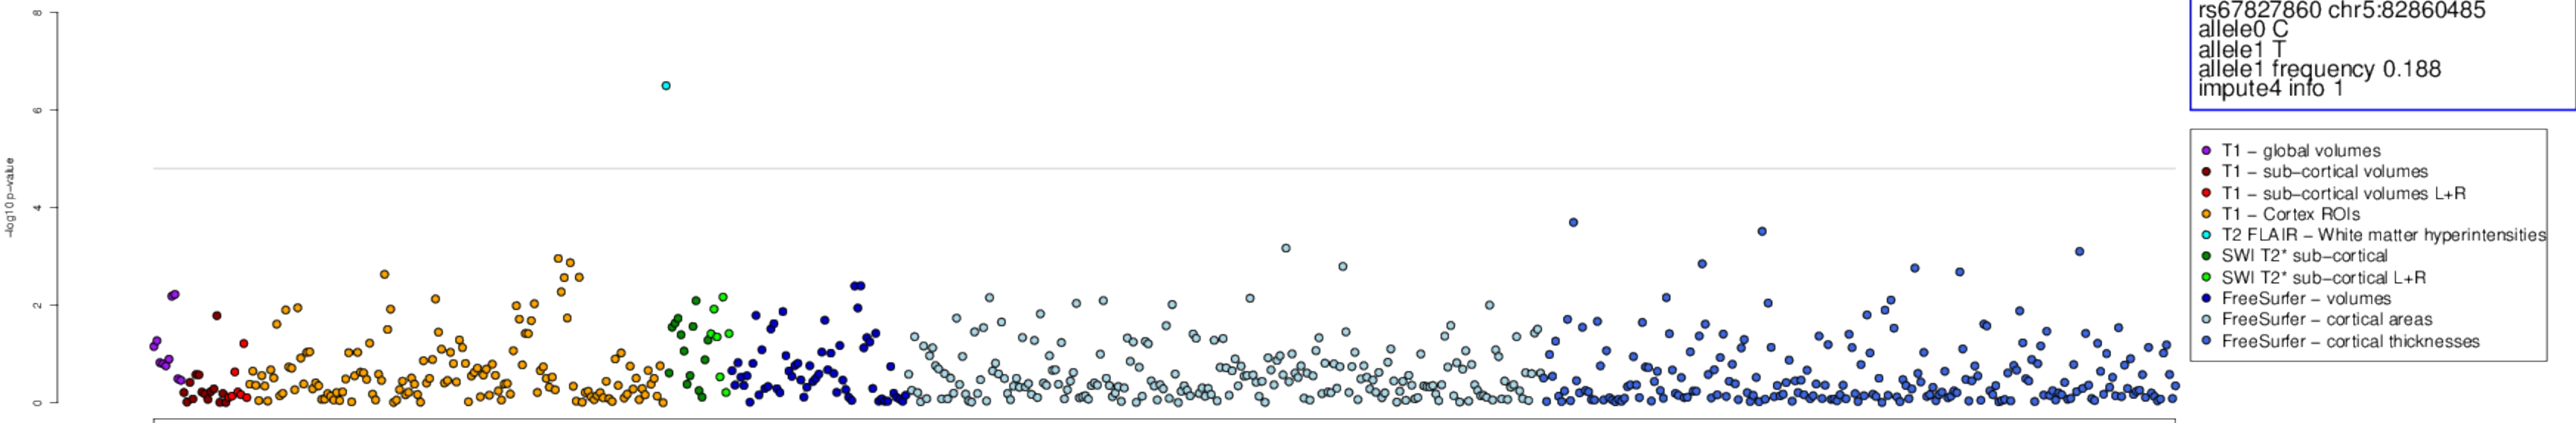

### Structural connectivity (Diffusion MRI)

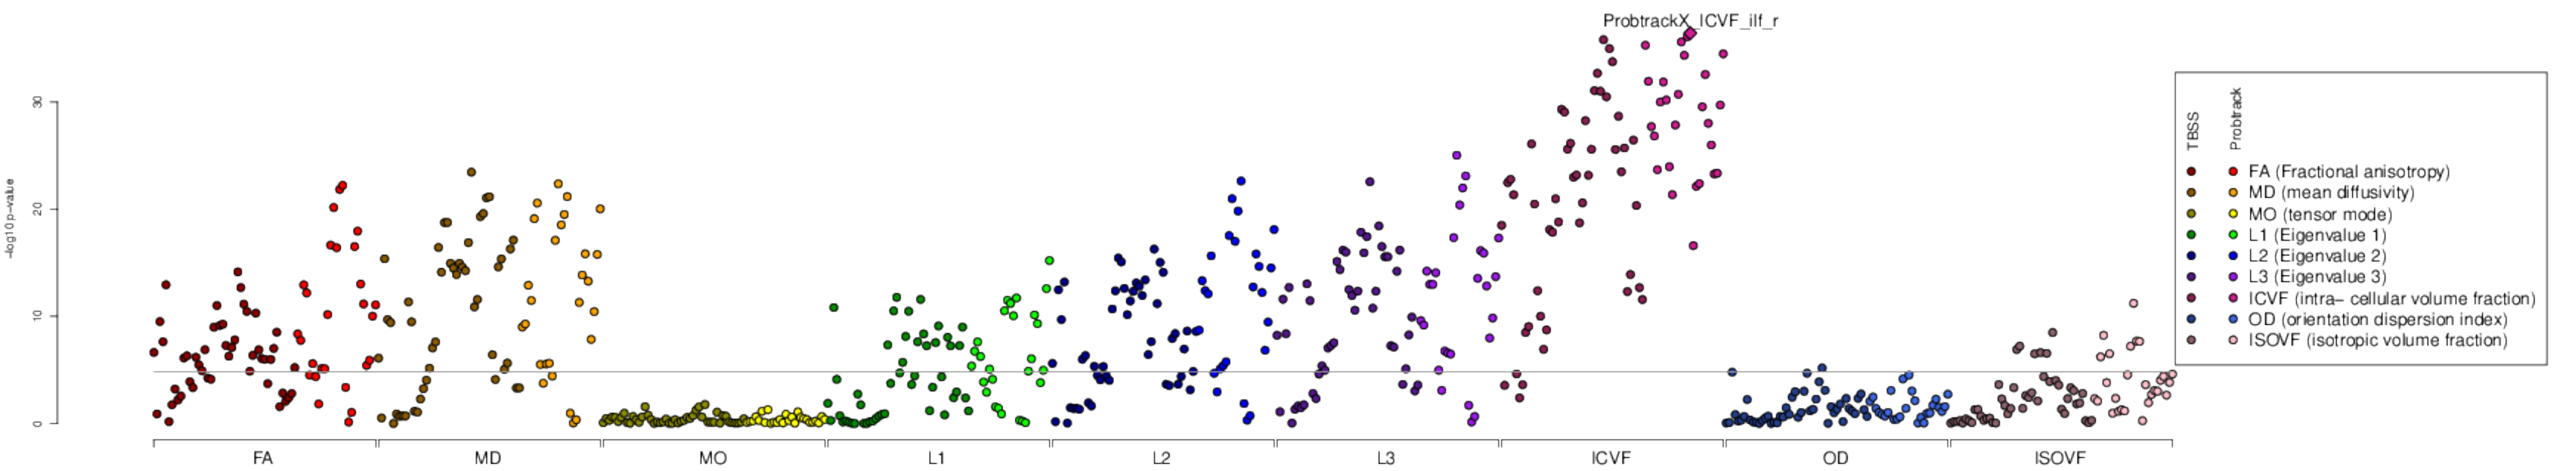

### functional MRI

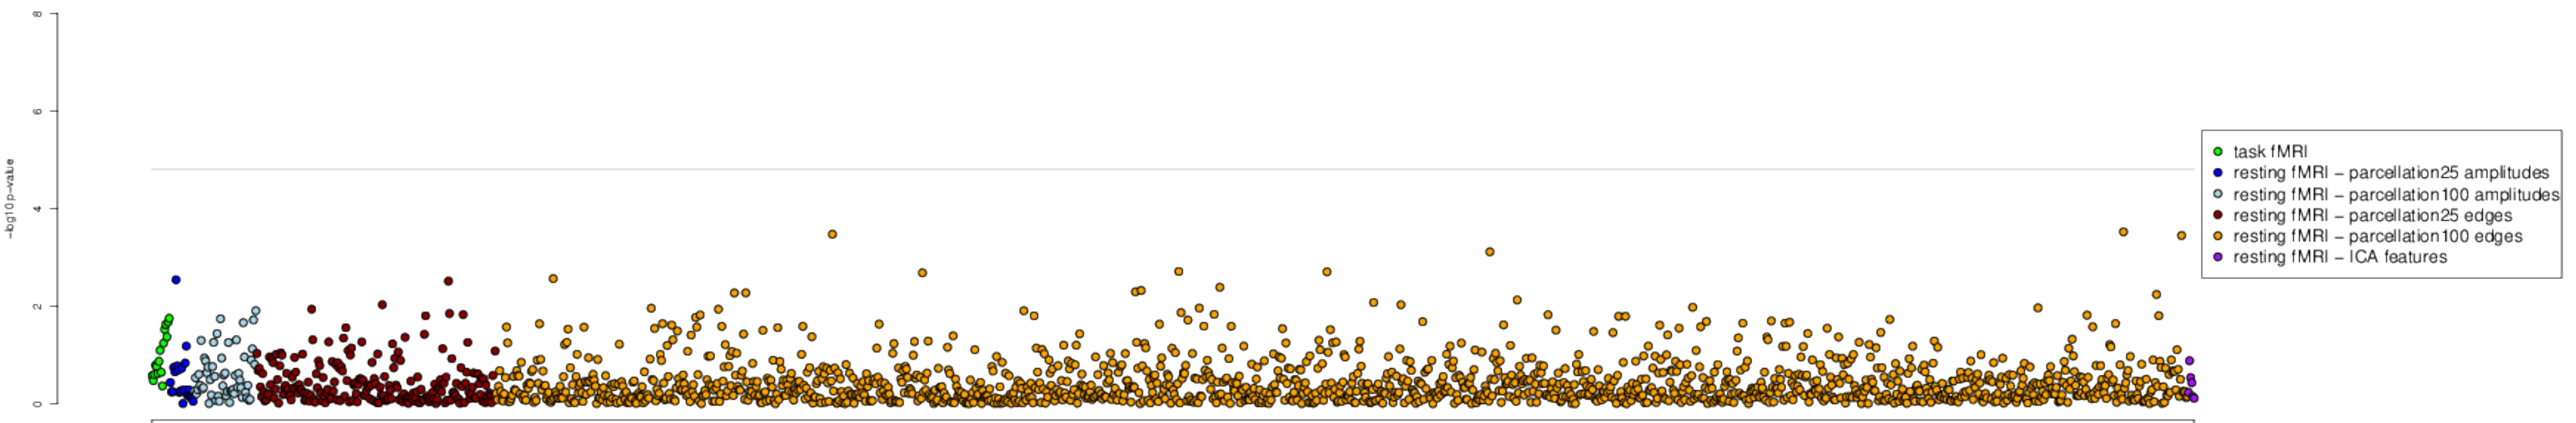



### Structural MRI

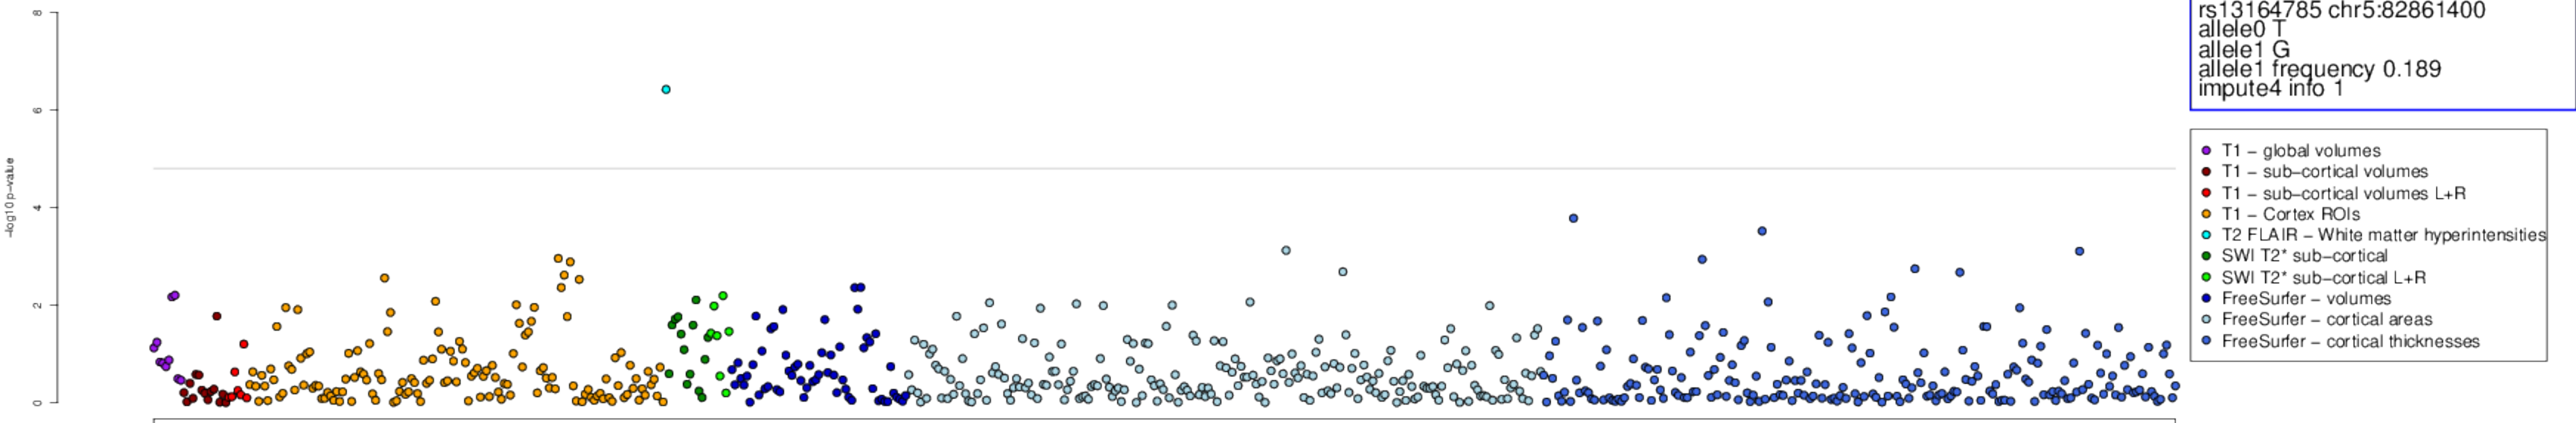

### Structural connectivity (Diffusion MRI)

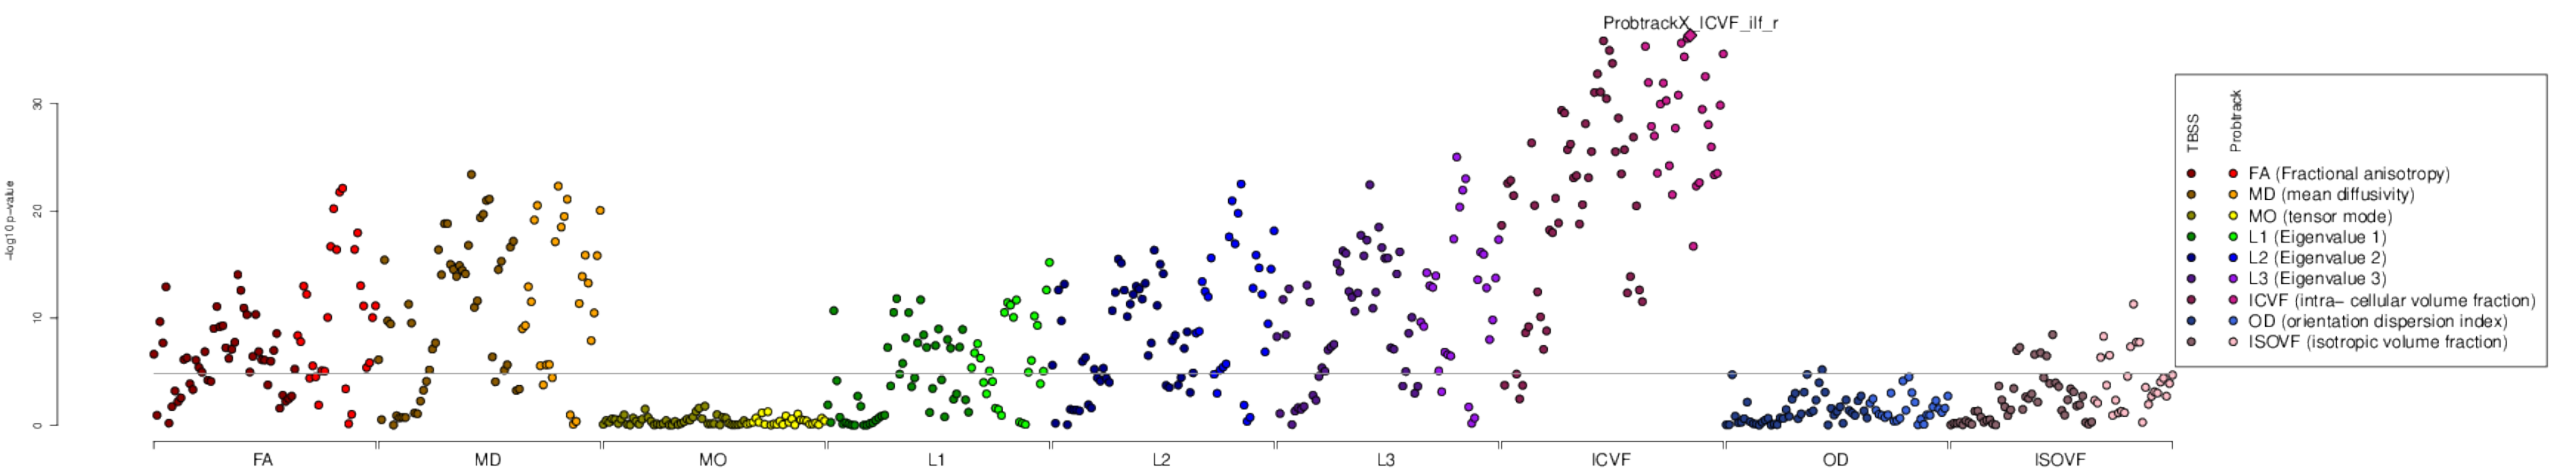

### functional MRI

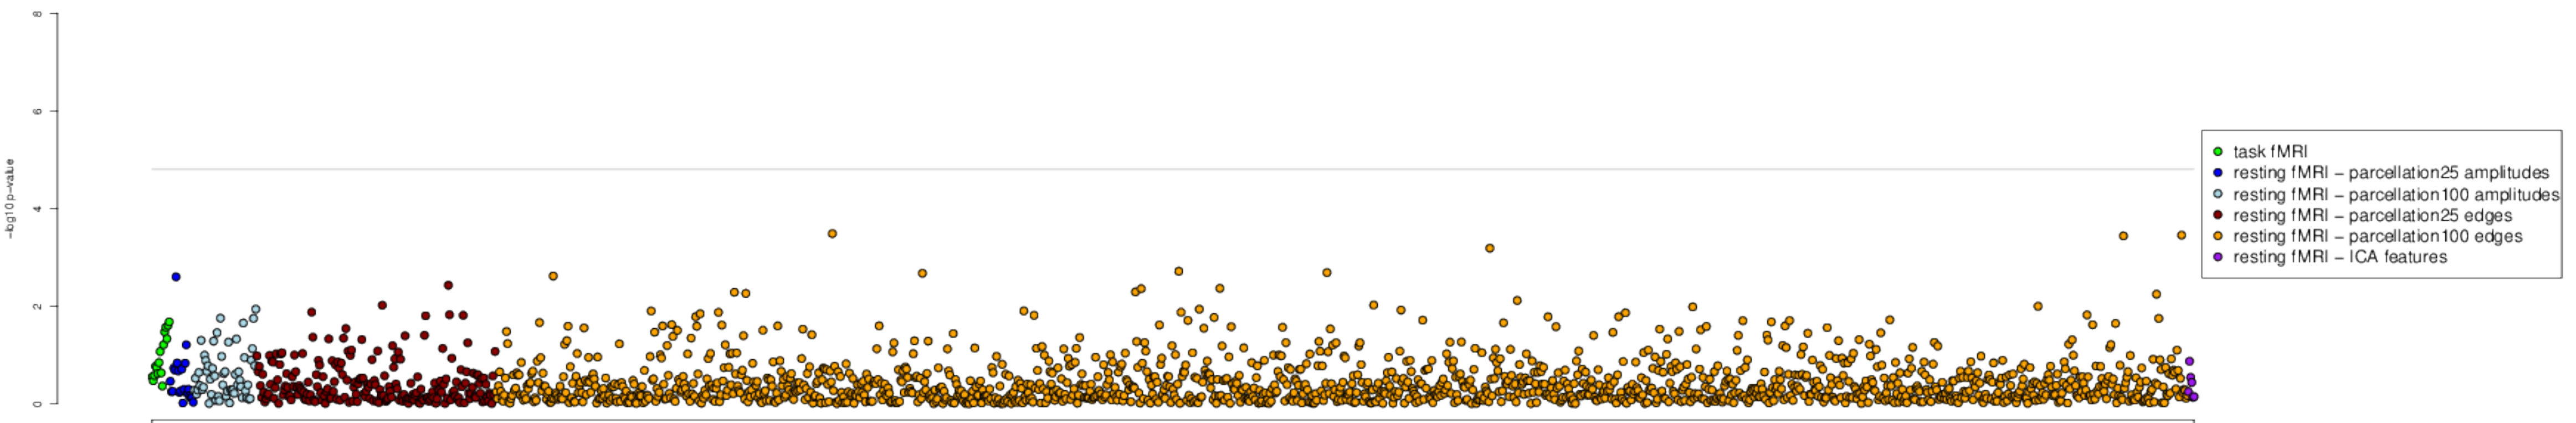

### Structural MRI

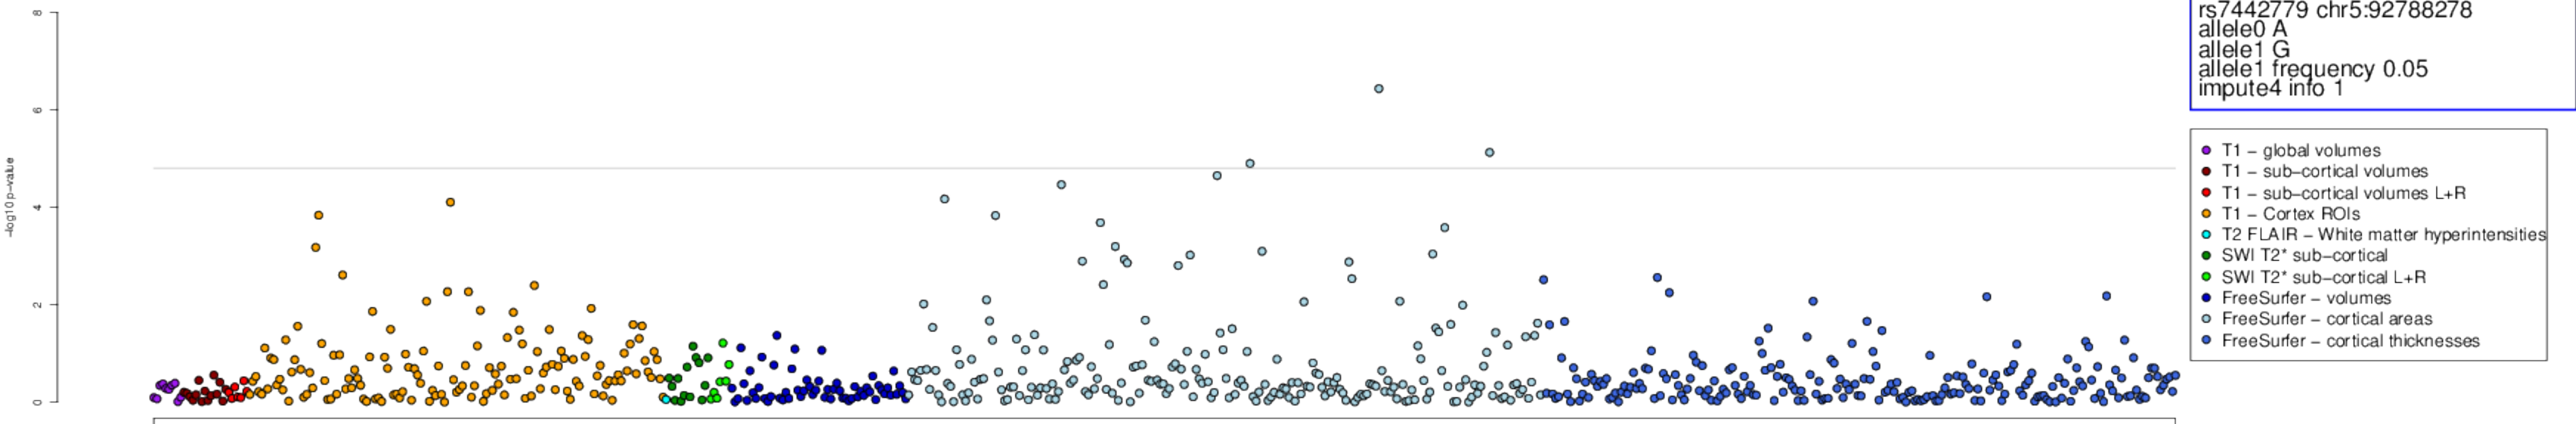

### Structural connectivity (Diffusion MRI)

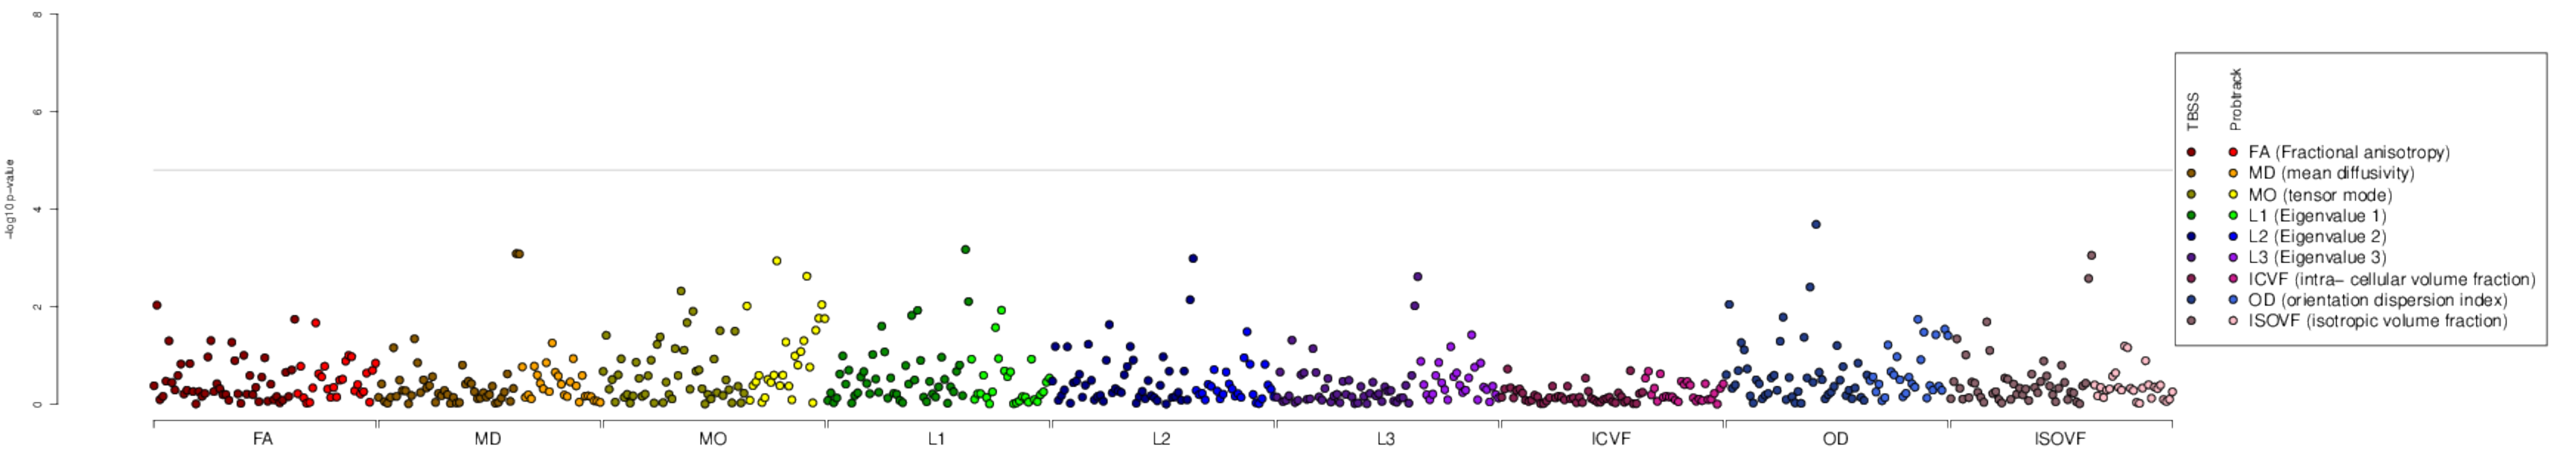

### functional MRI

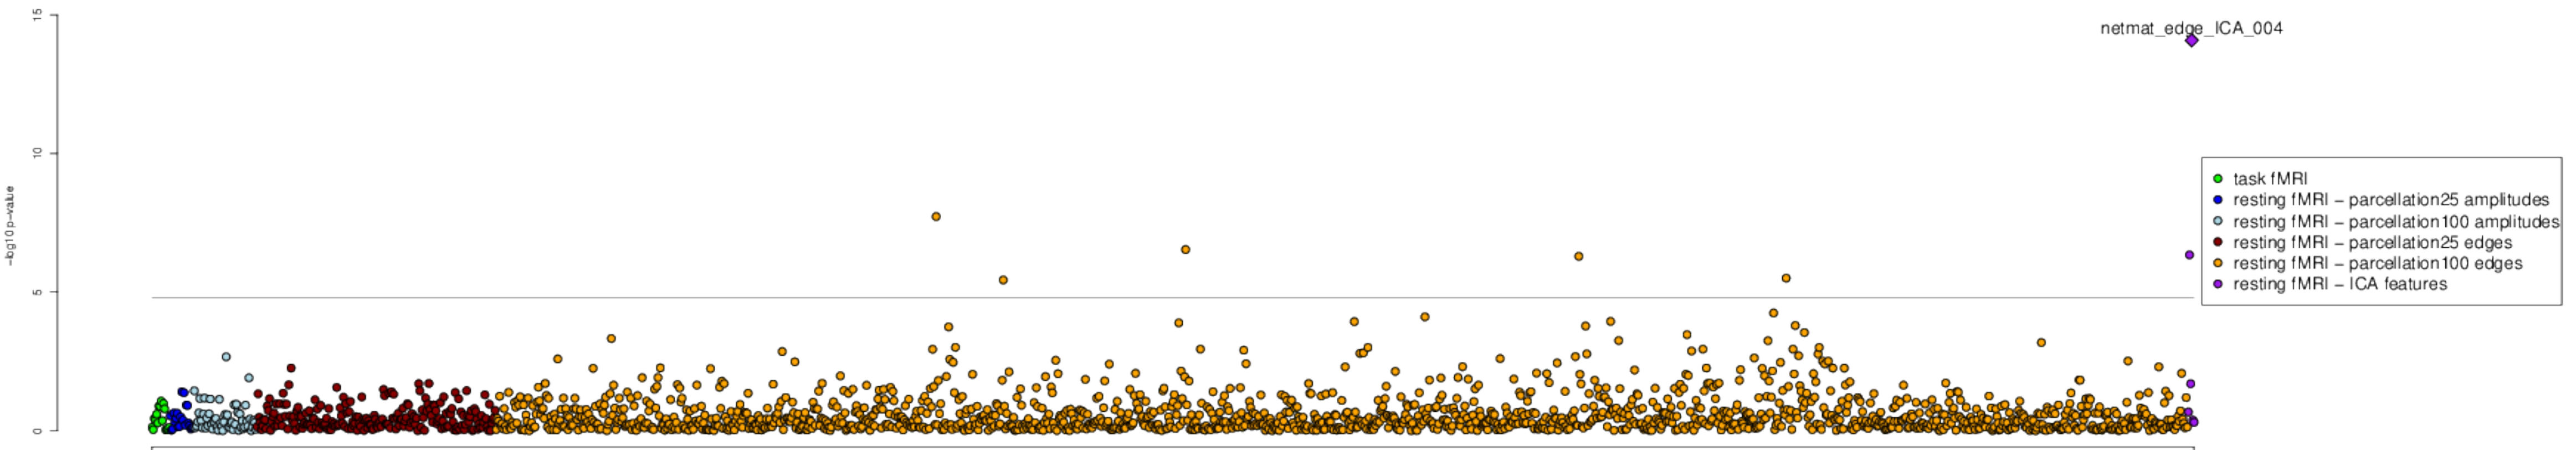

### Structural MRI

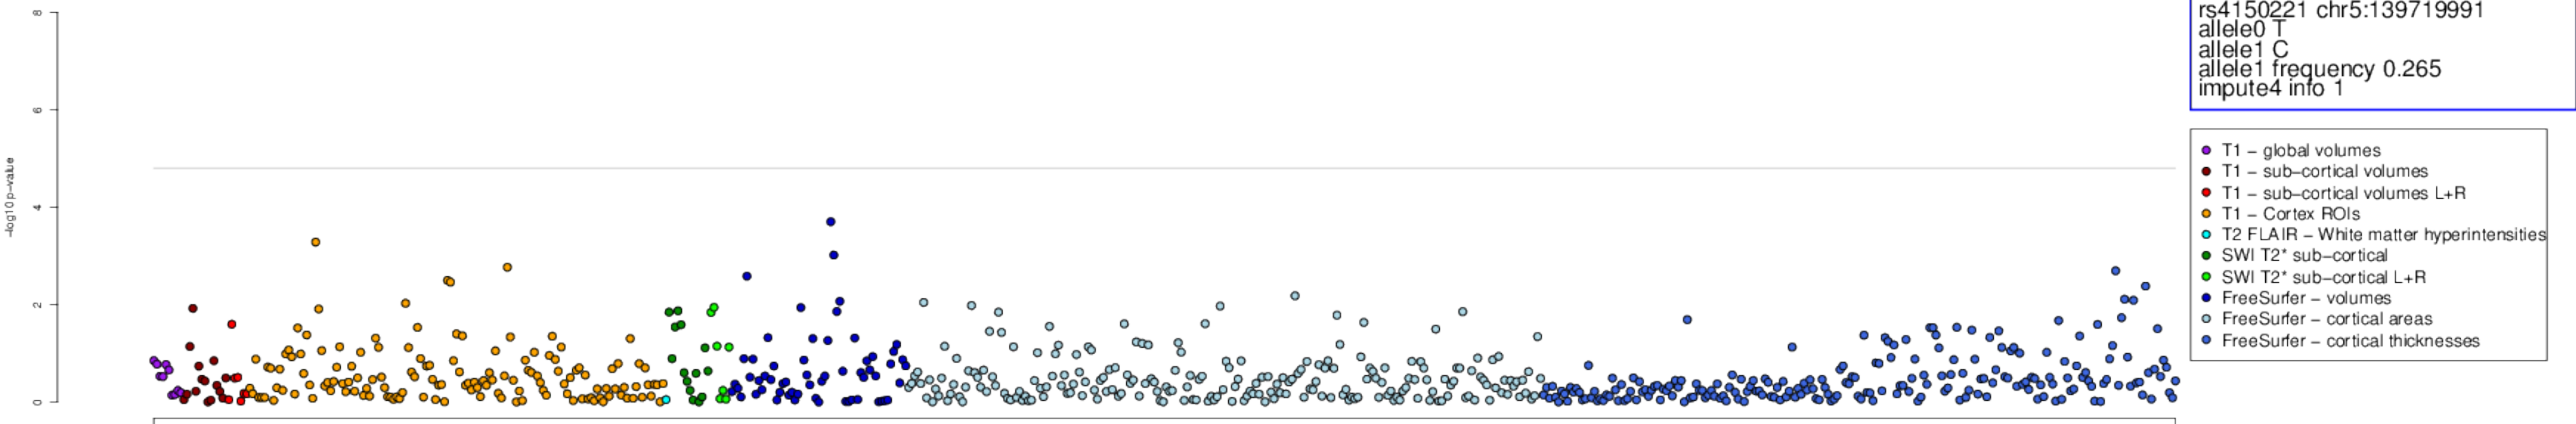

### Structural connectivity (Diffusion MRI)

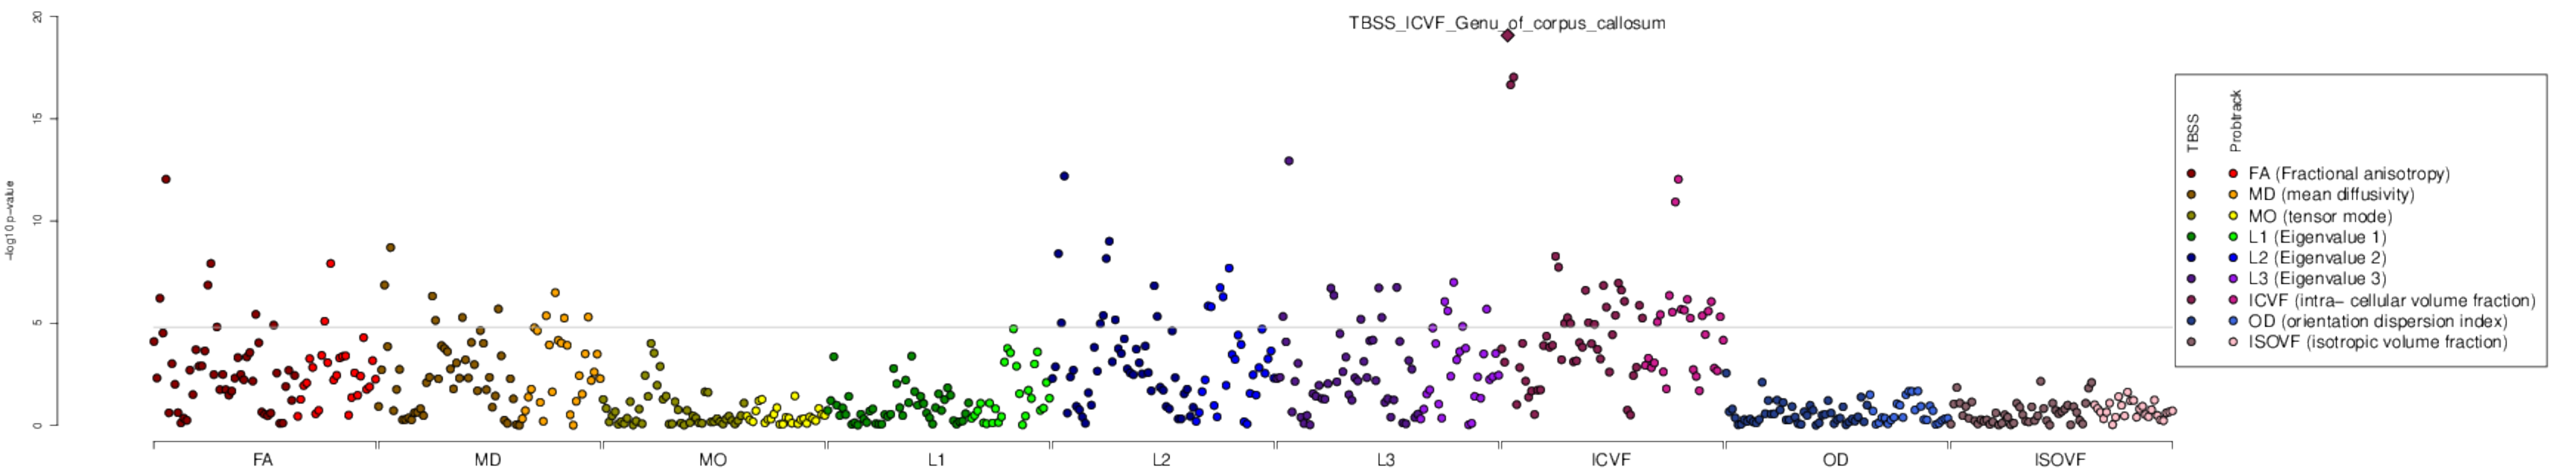

### functional MRI

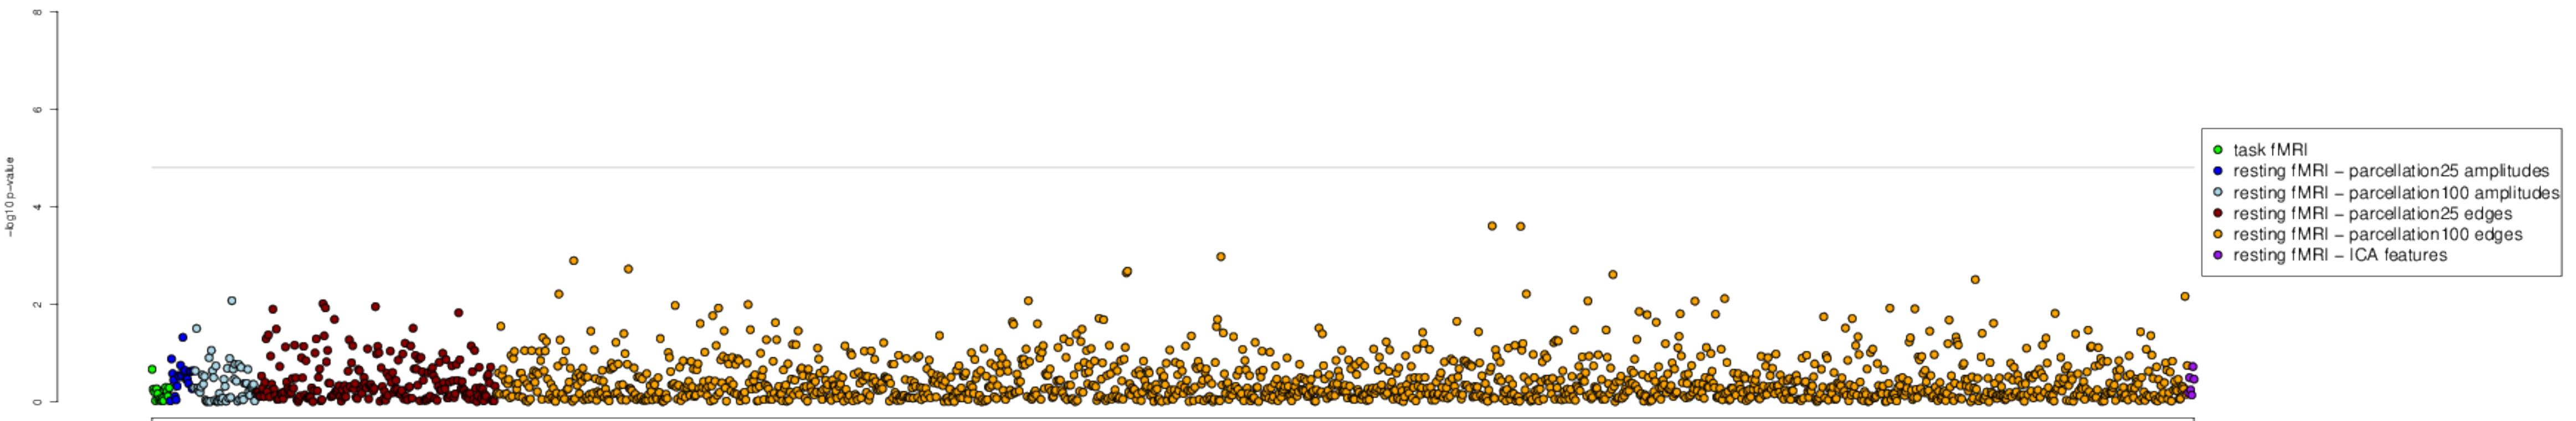

### Structural MRI

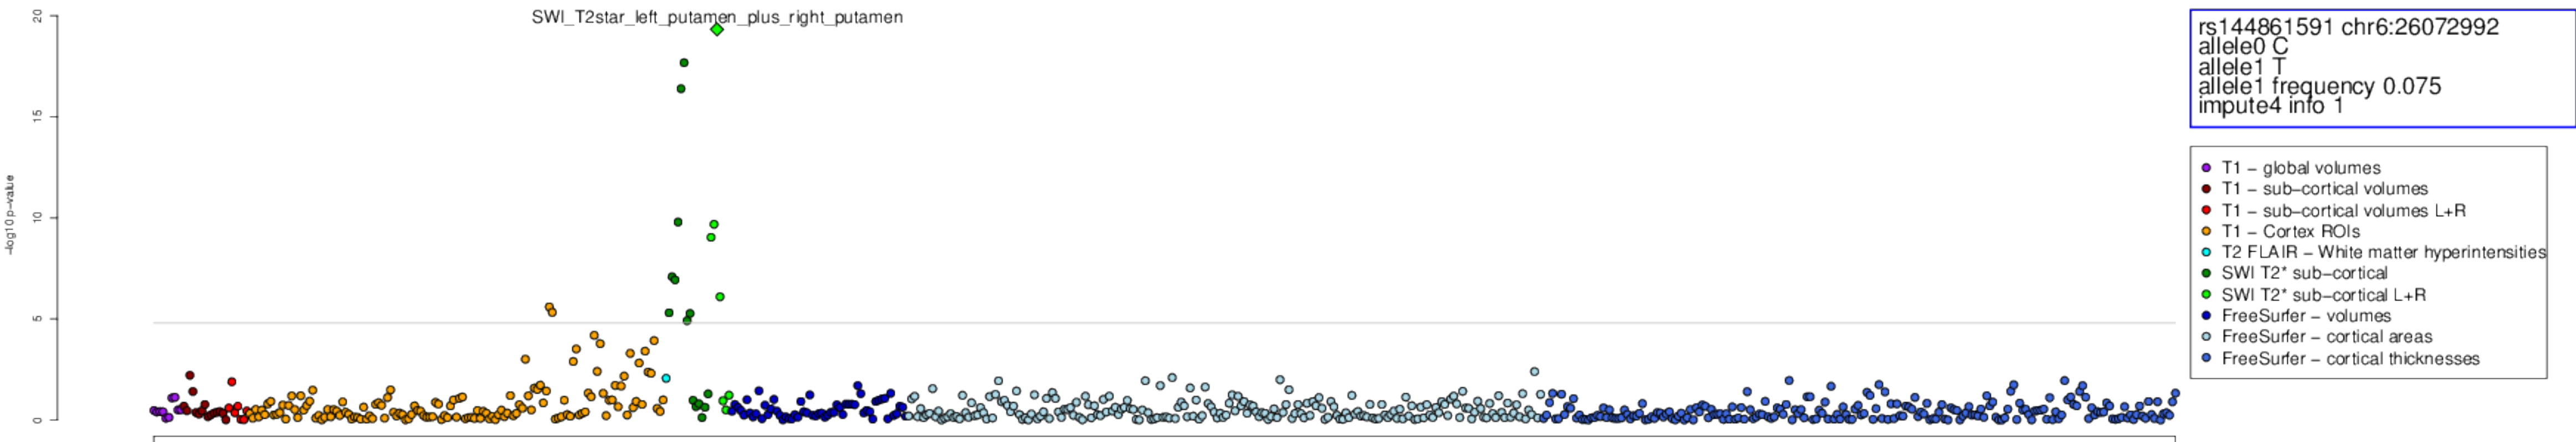

### Structural connectivity (Diffusion MRI)

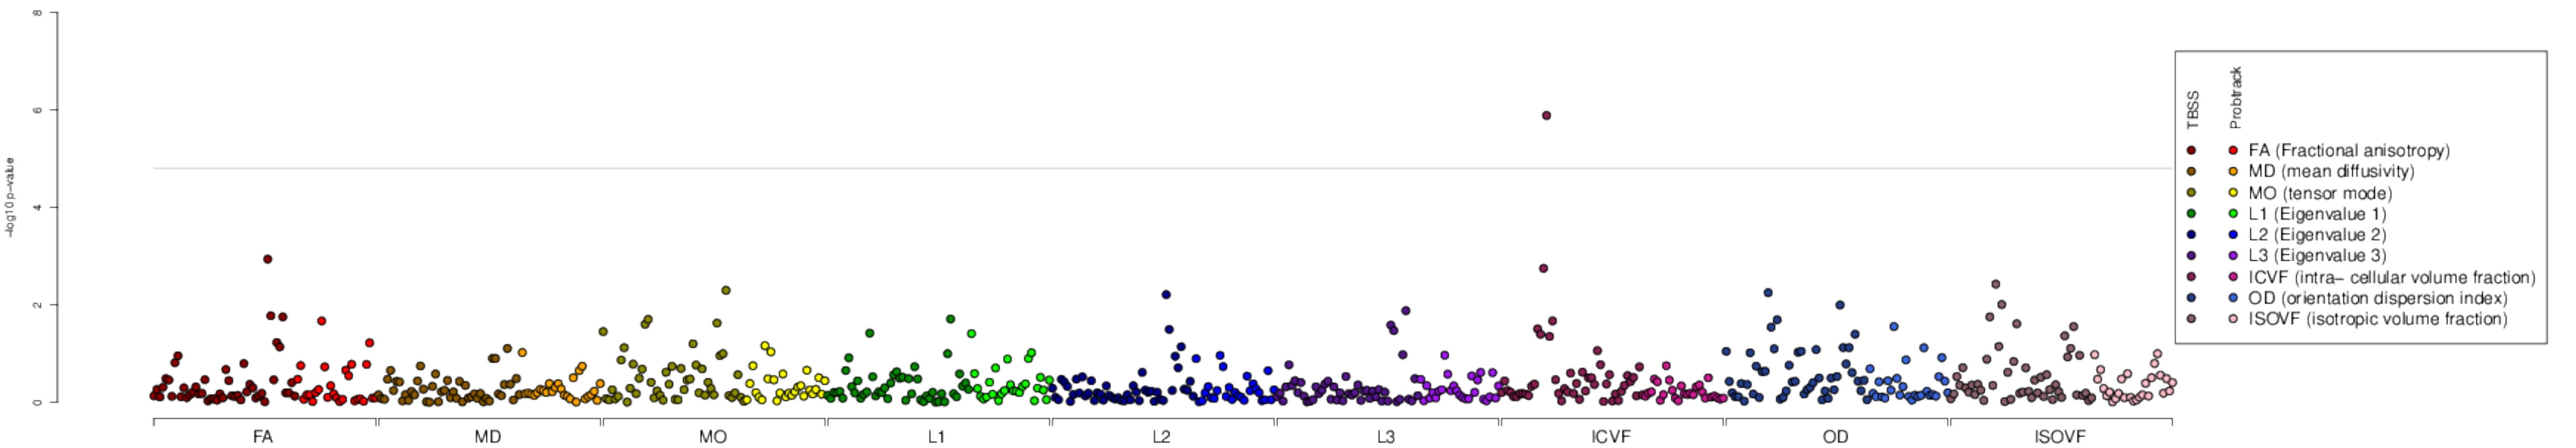

### functional MRI

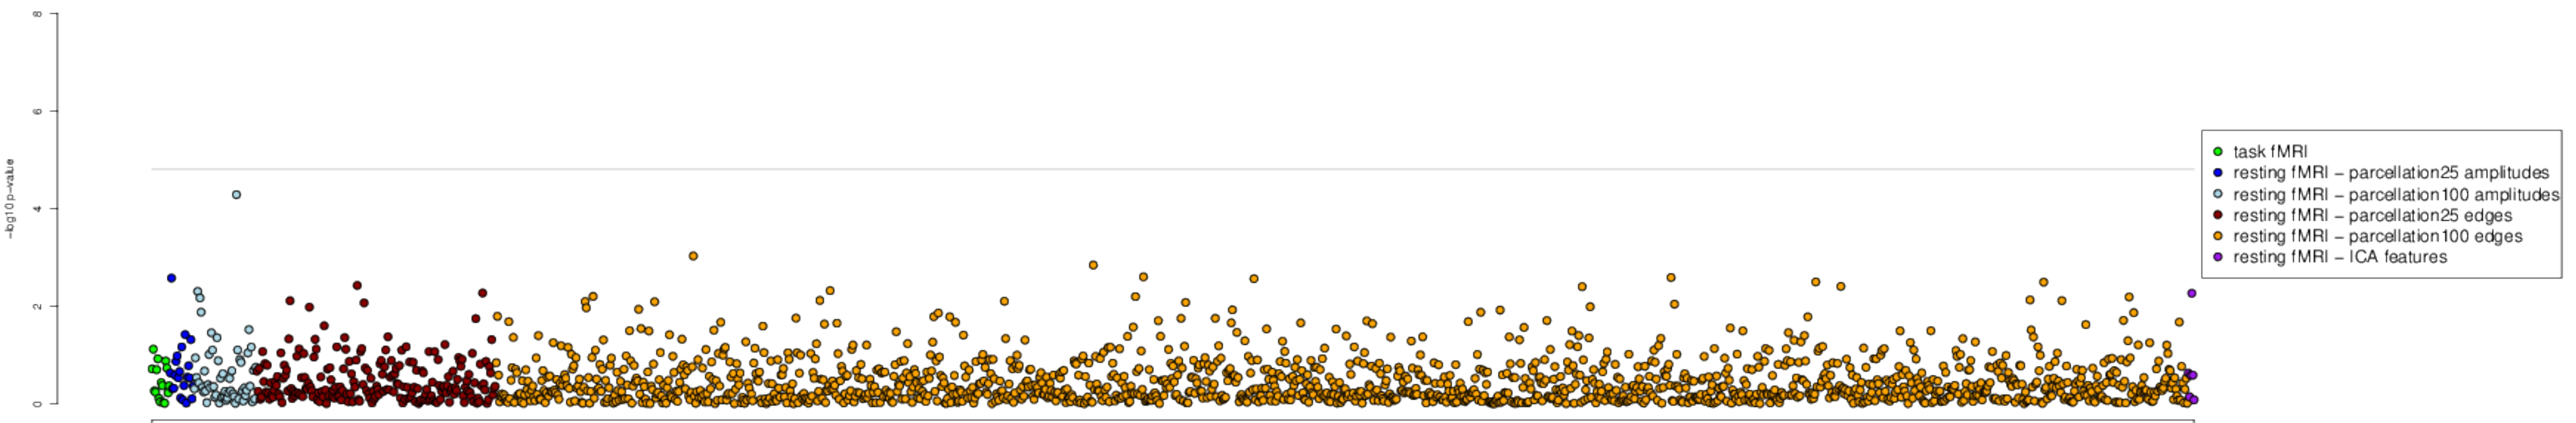

### Structural MRI

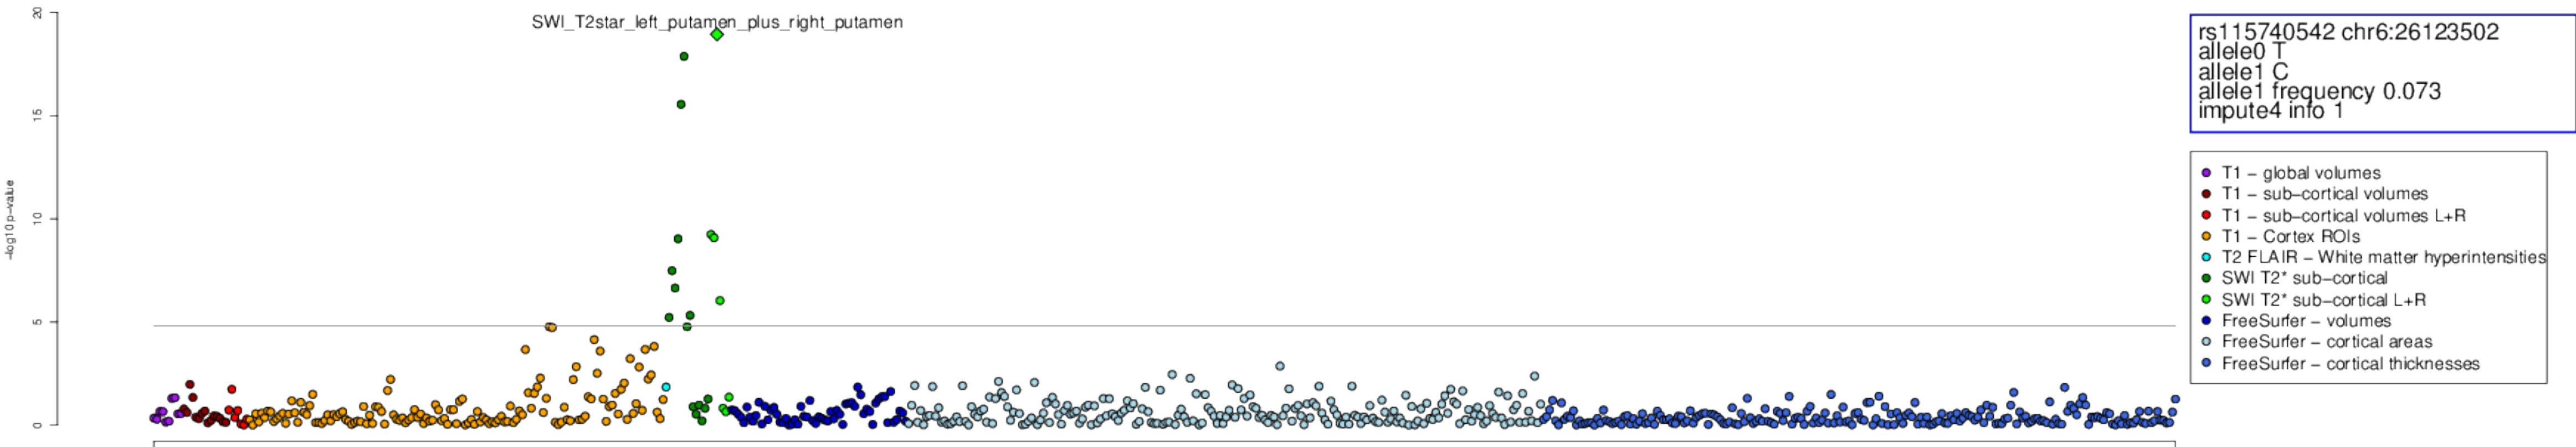

### Structural connectivity (Diffusion MRI)

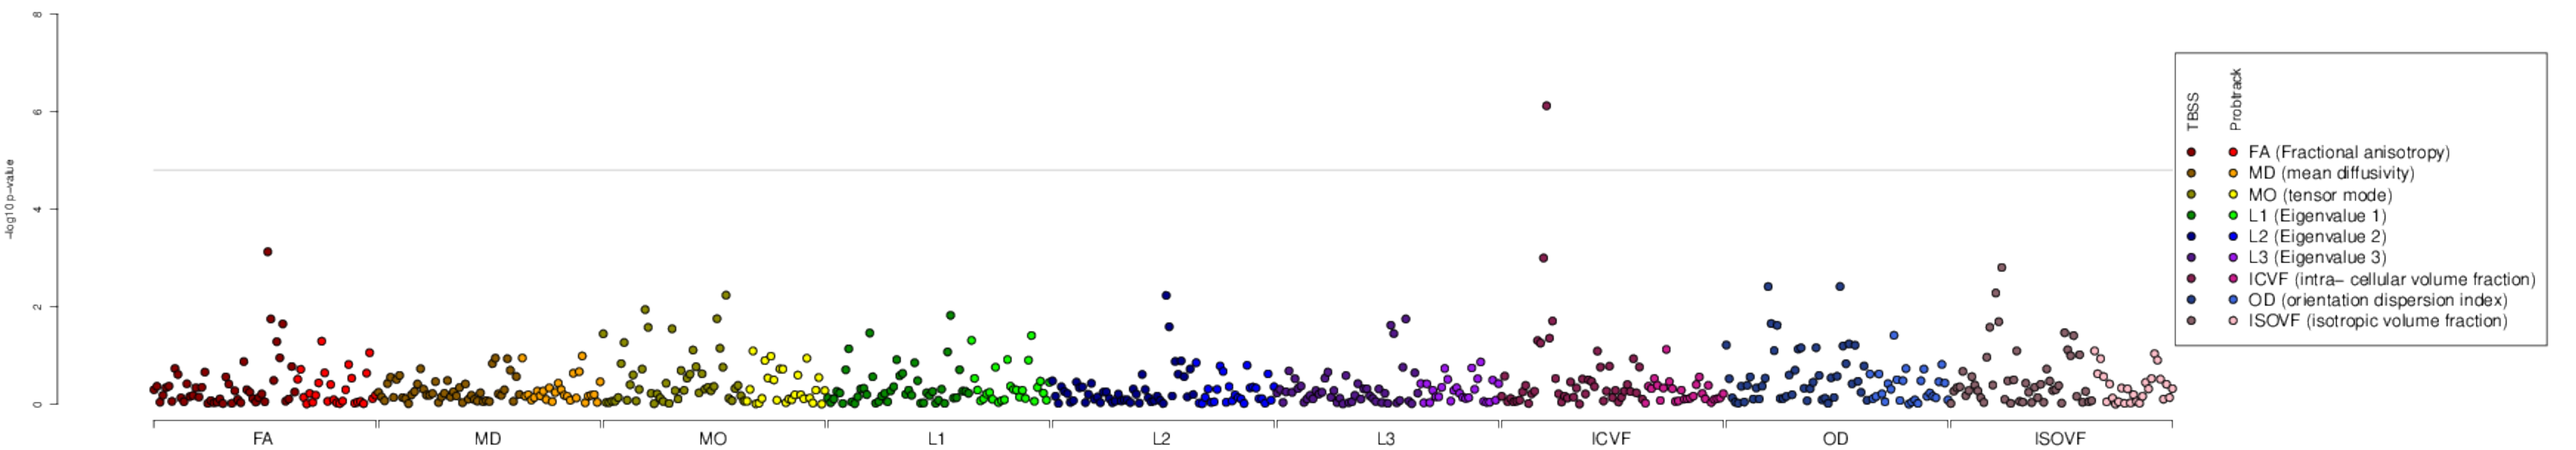

### functional MRI

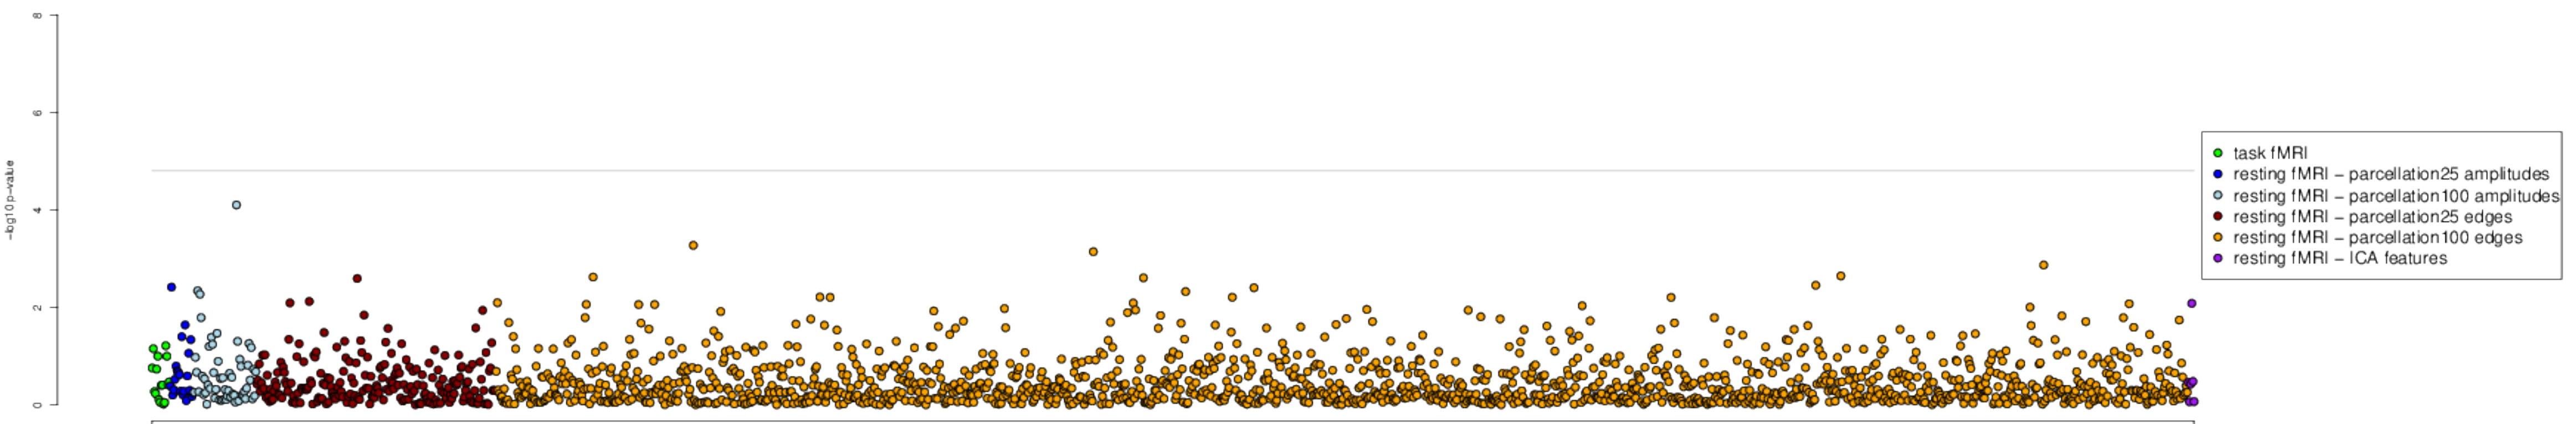

### Structural MRI

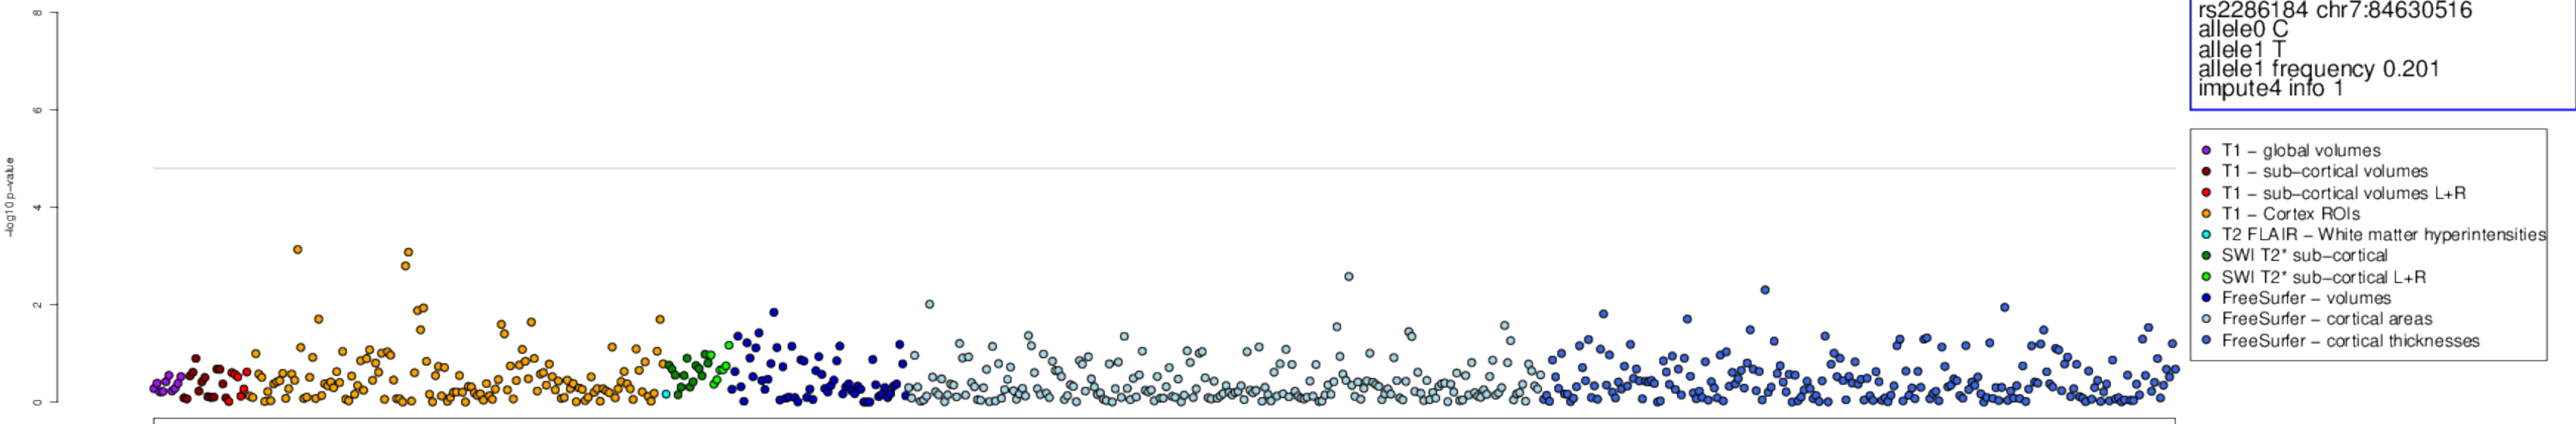

### Structural connectivity (Diffusion MRI)

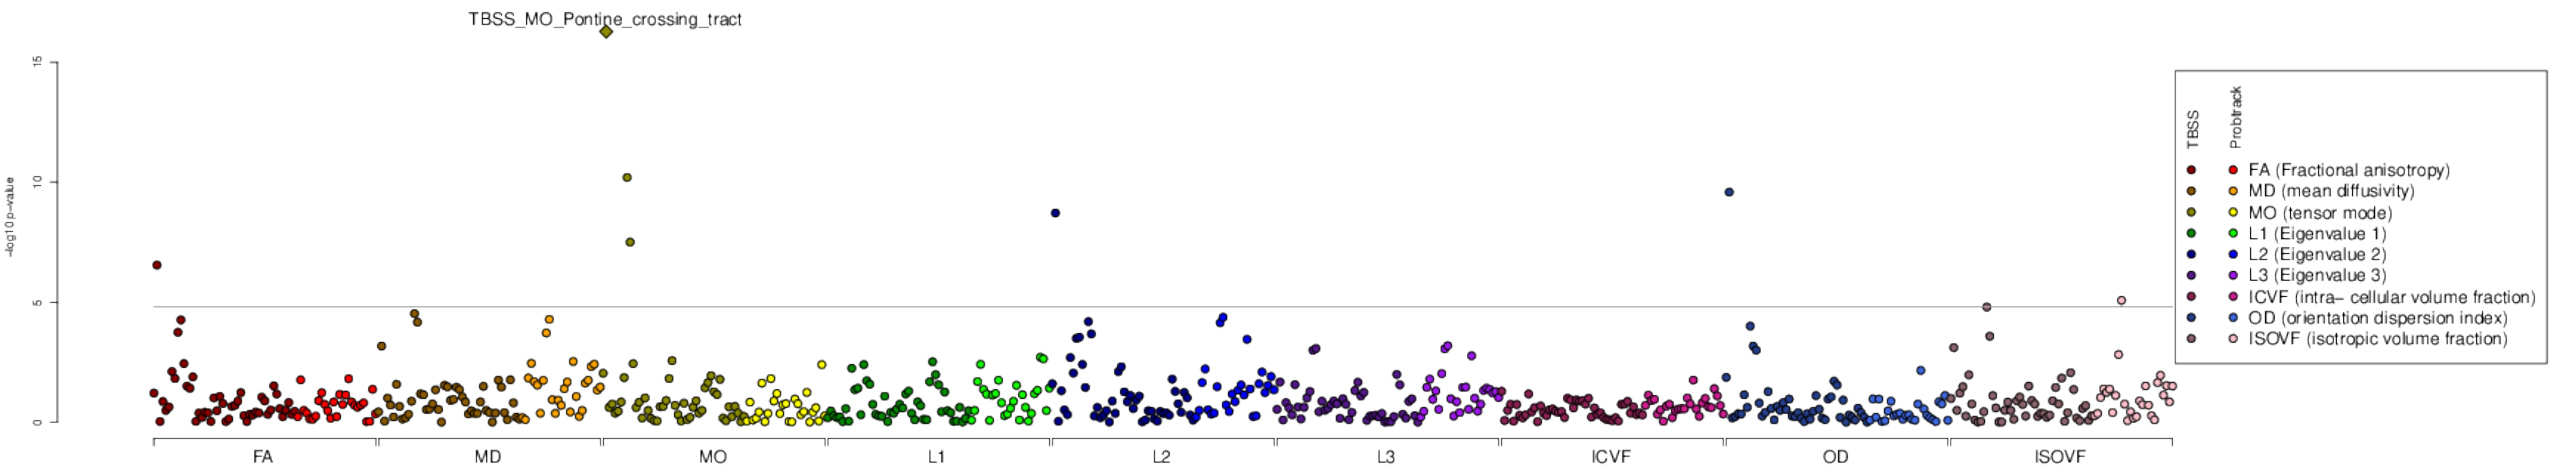

### functional MRI

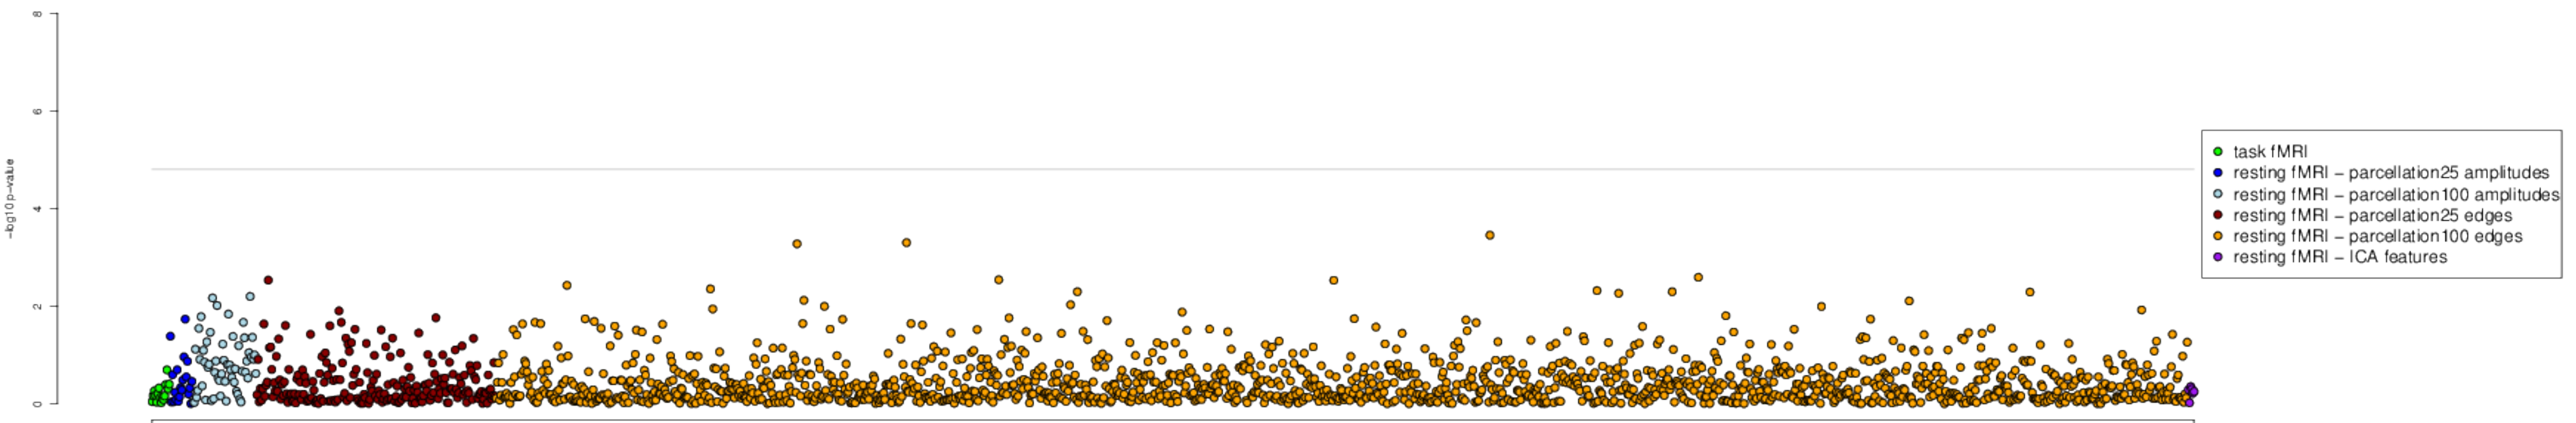

### Structural MRI

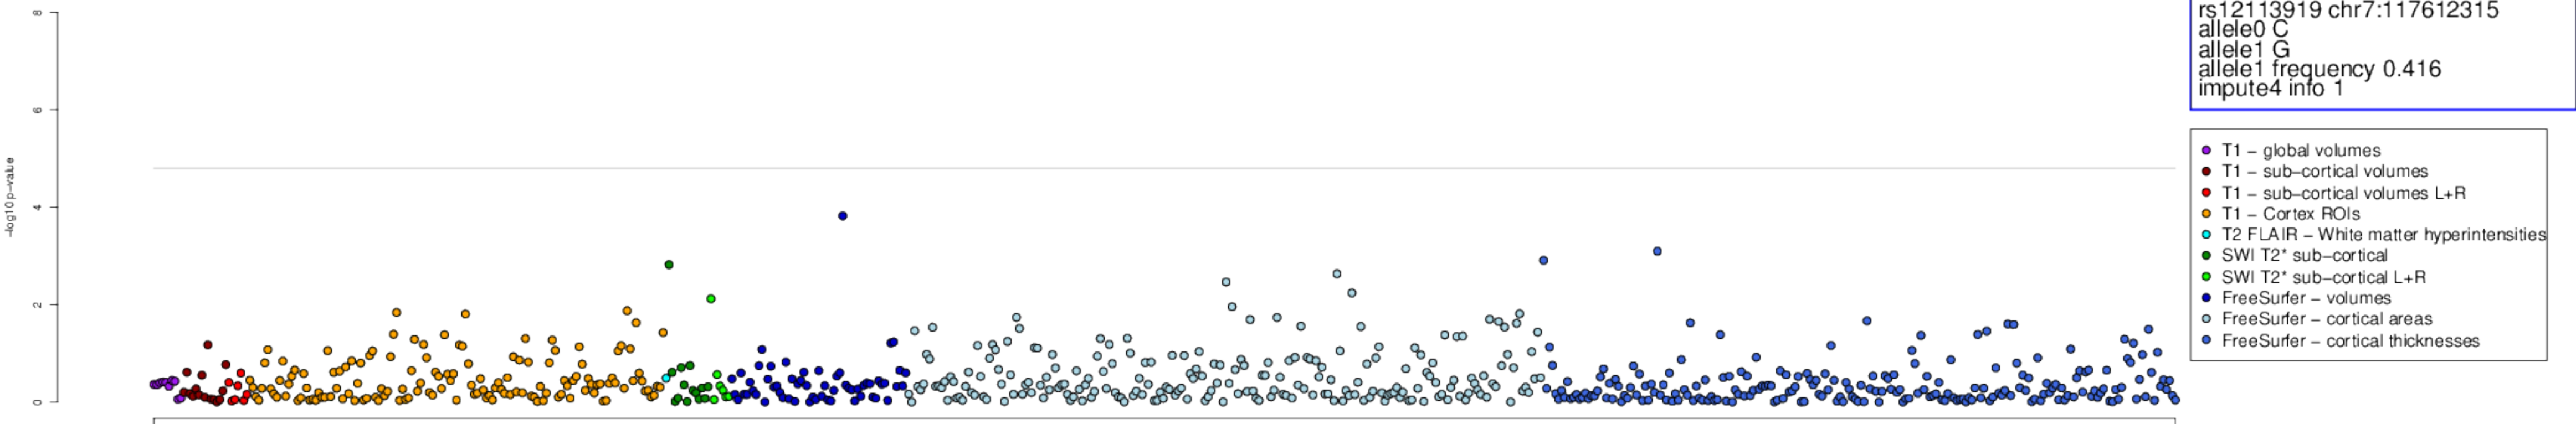

### Structural connectivity (Diffusion MRI)

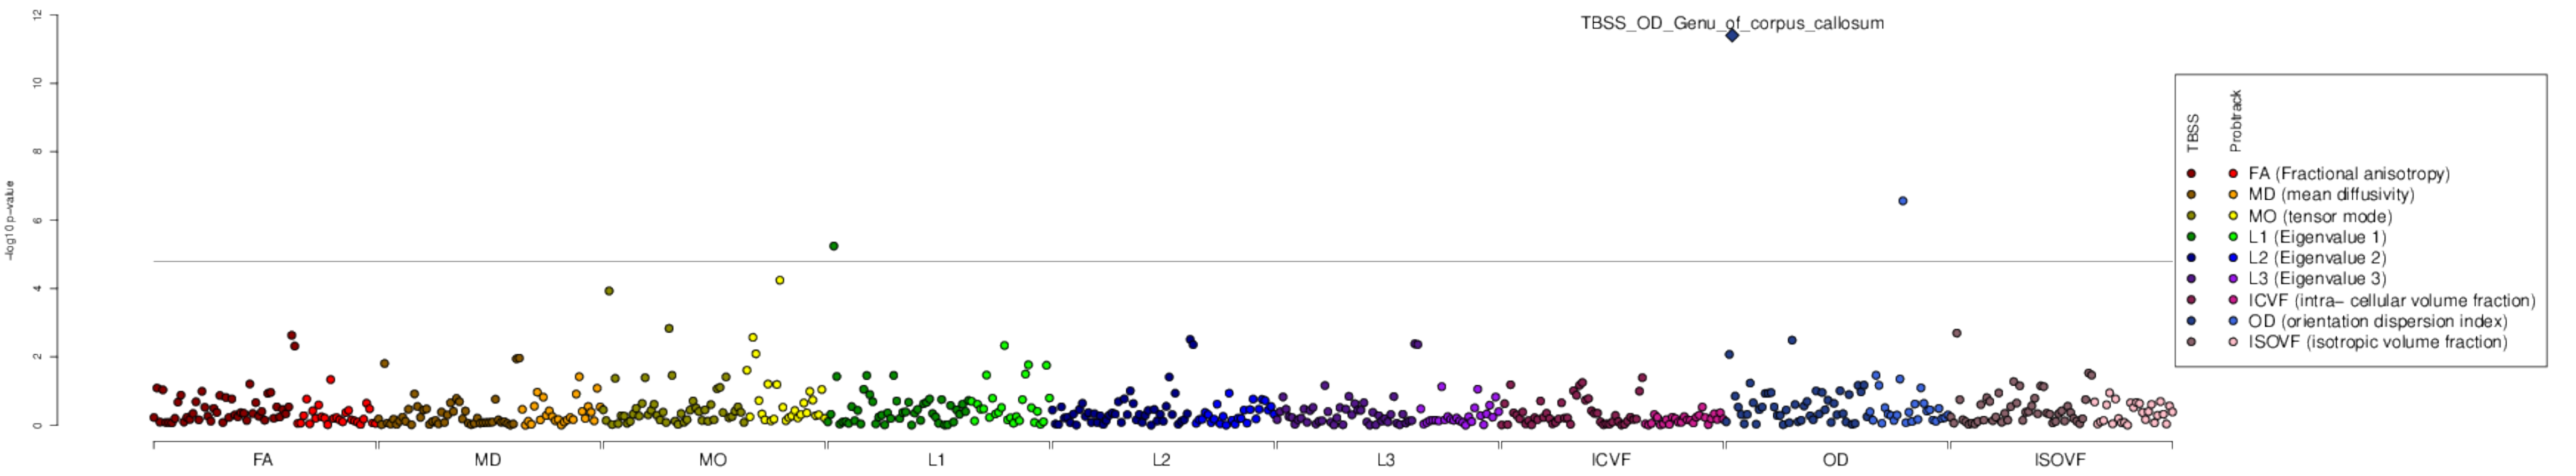

### functional MRI

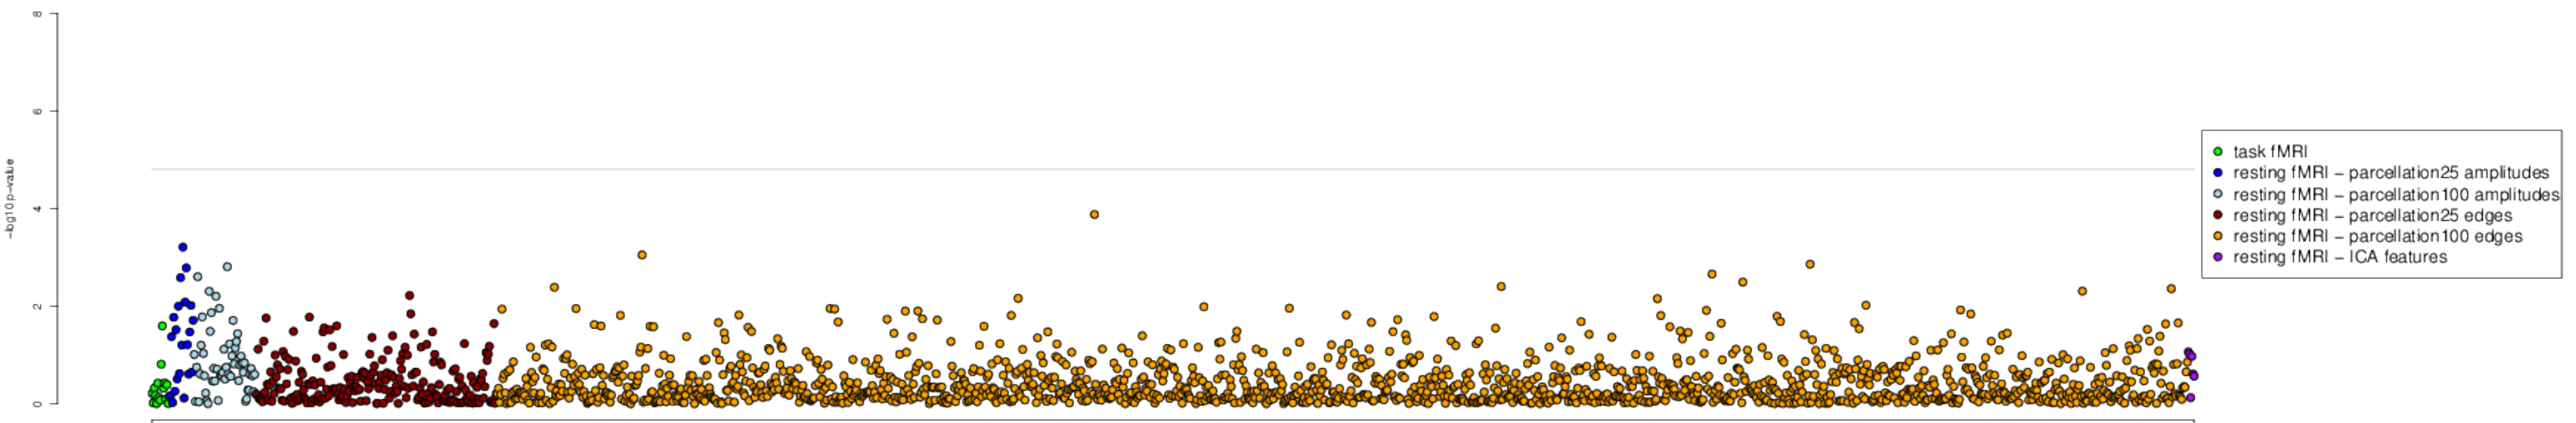

### Structural MRI

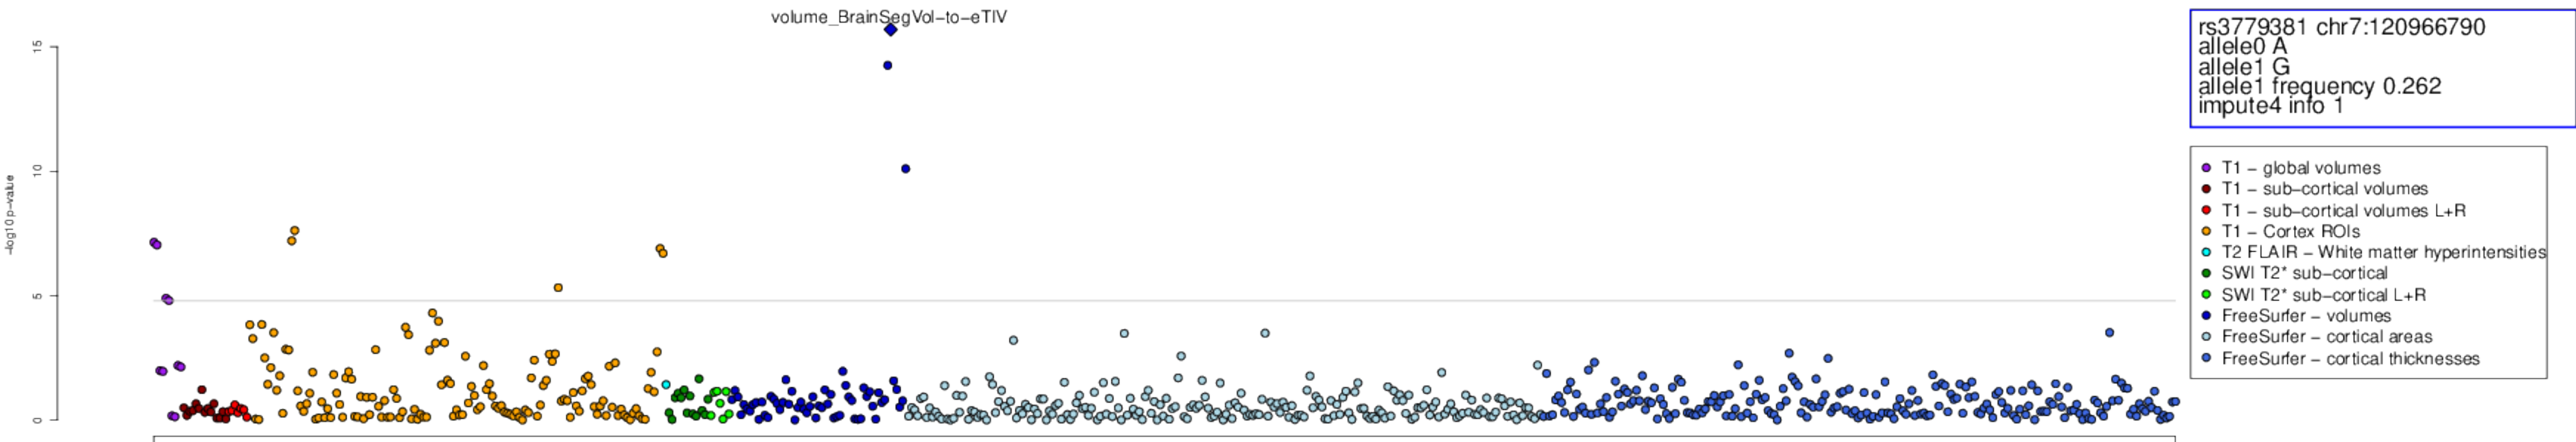

### Structural connectivity (Diffusion MRI)

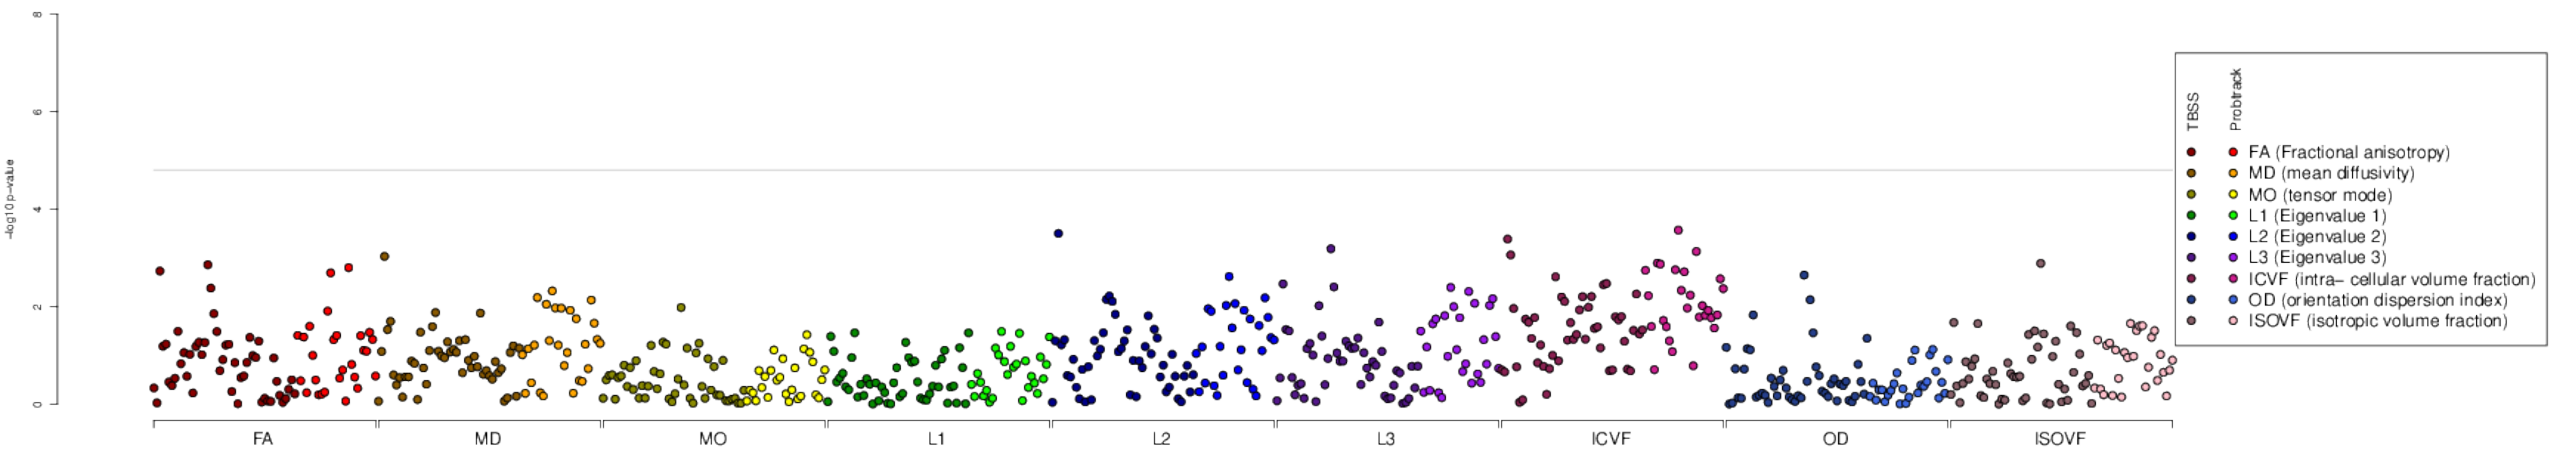

### functional MRI

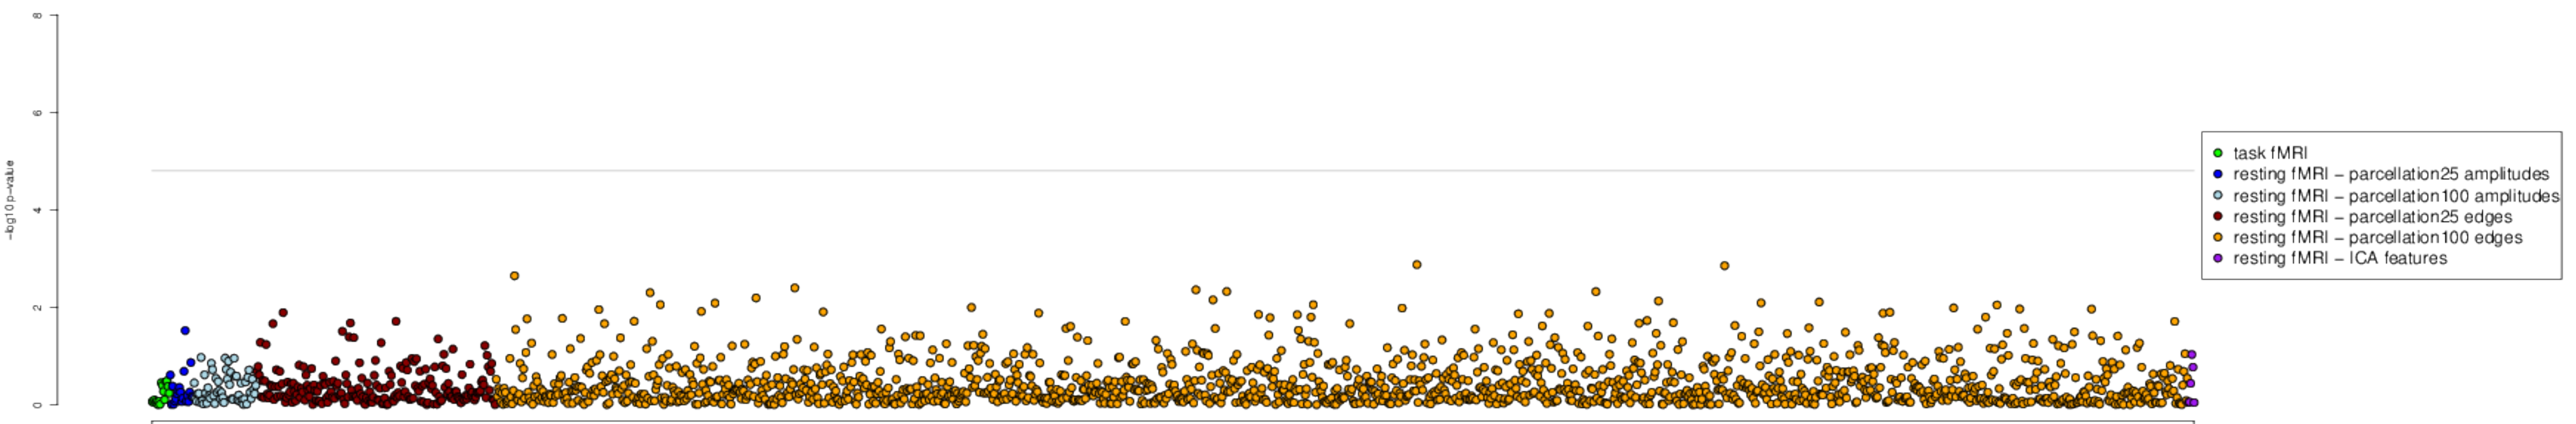



### Structural MRI

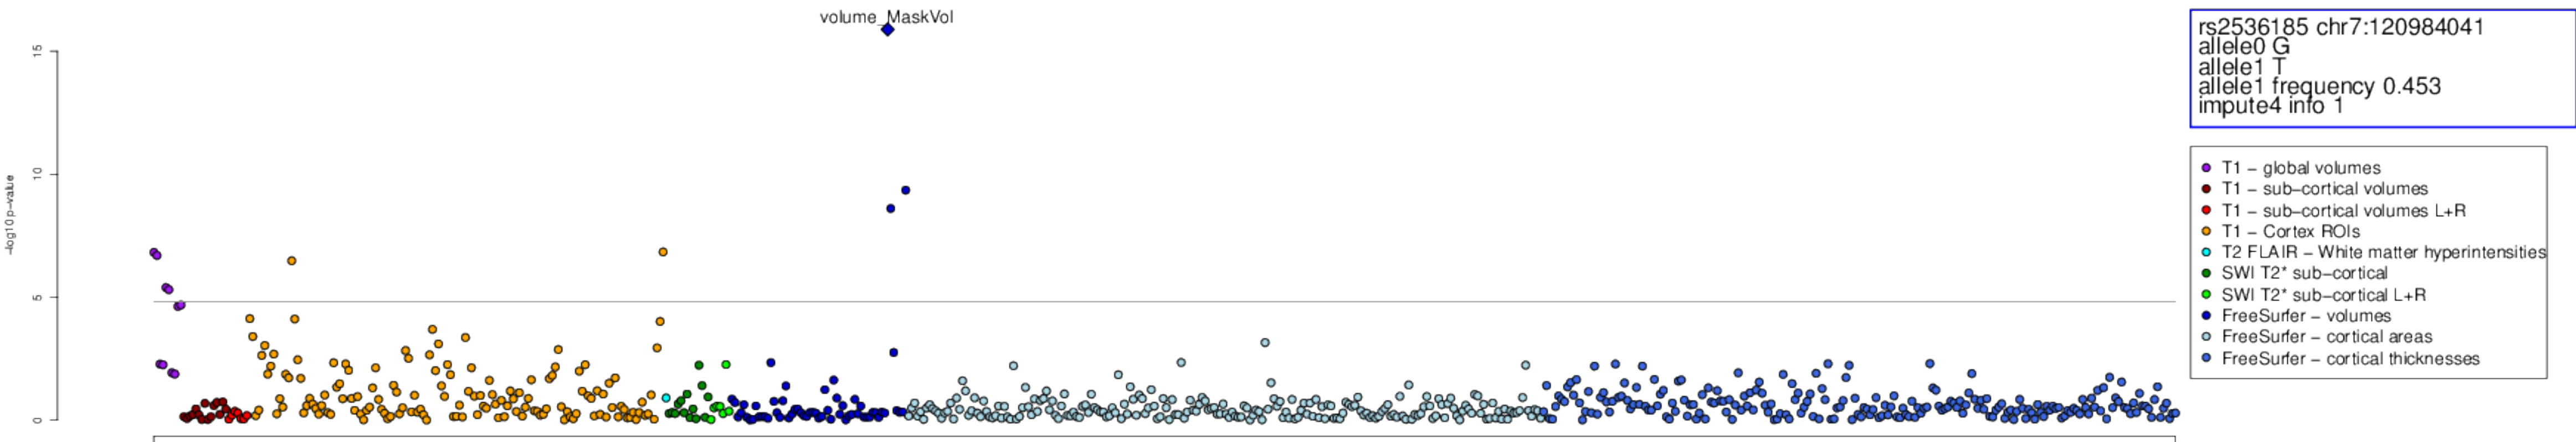

### Structural connectivity (Diffusion MRI)

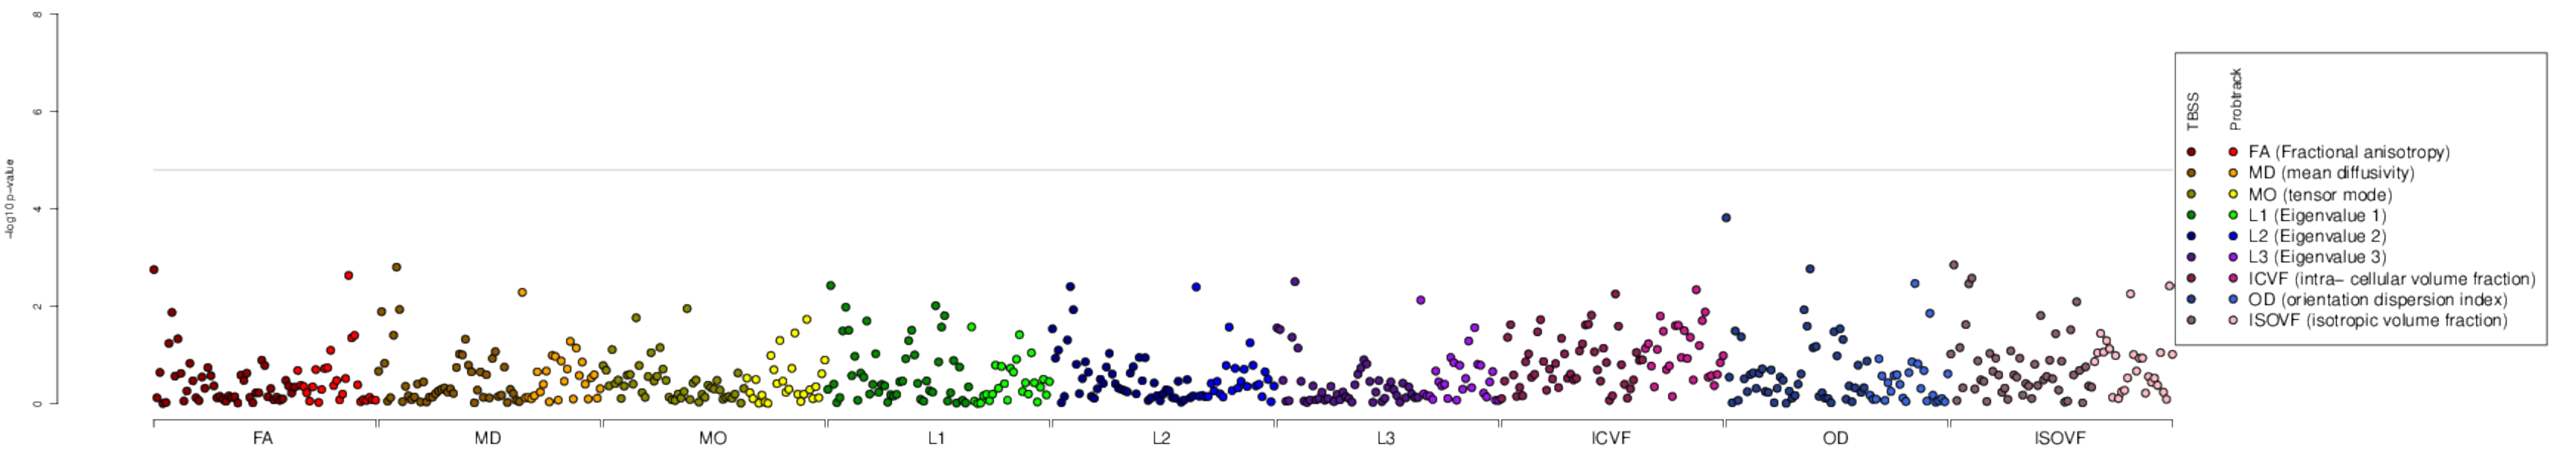

### functional MRI

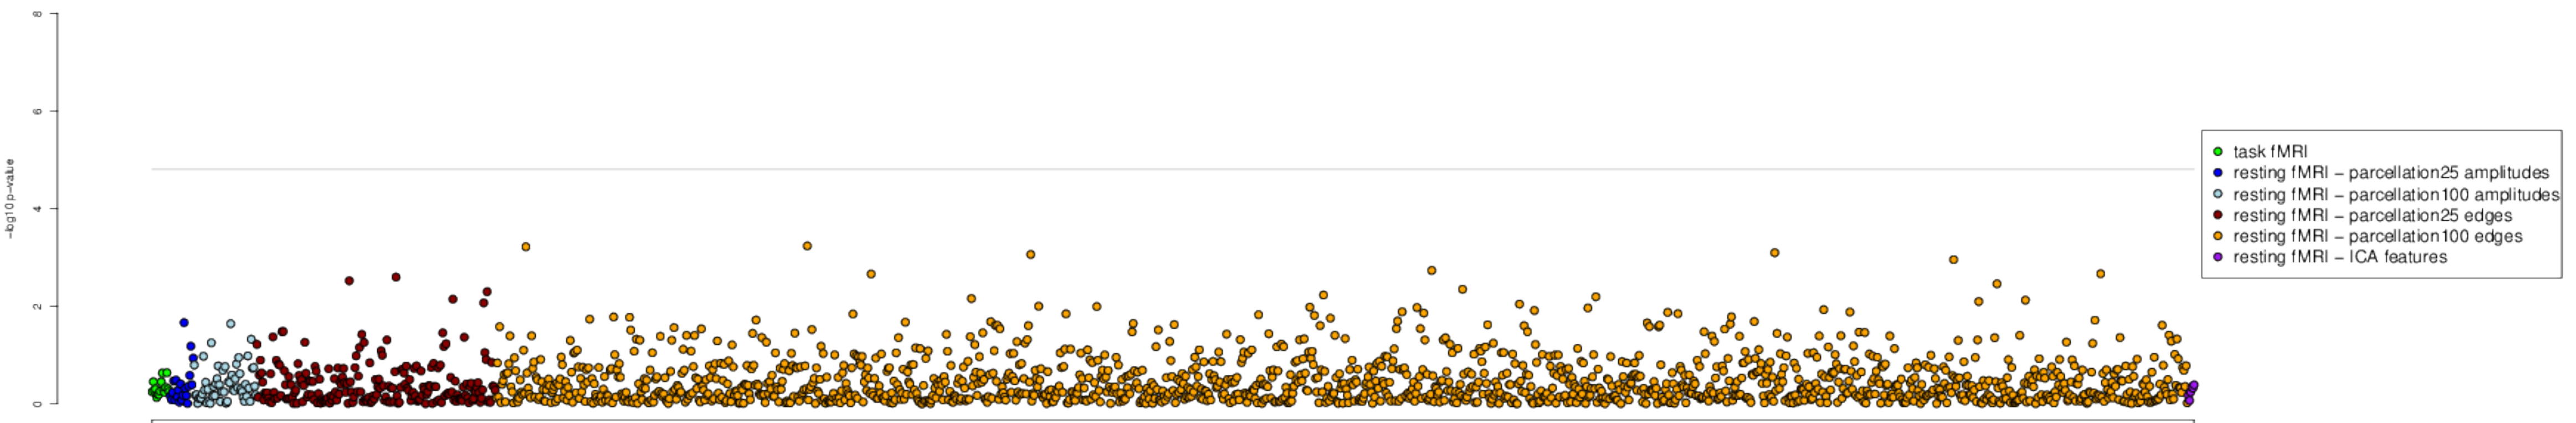

### Structural MRI

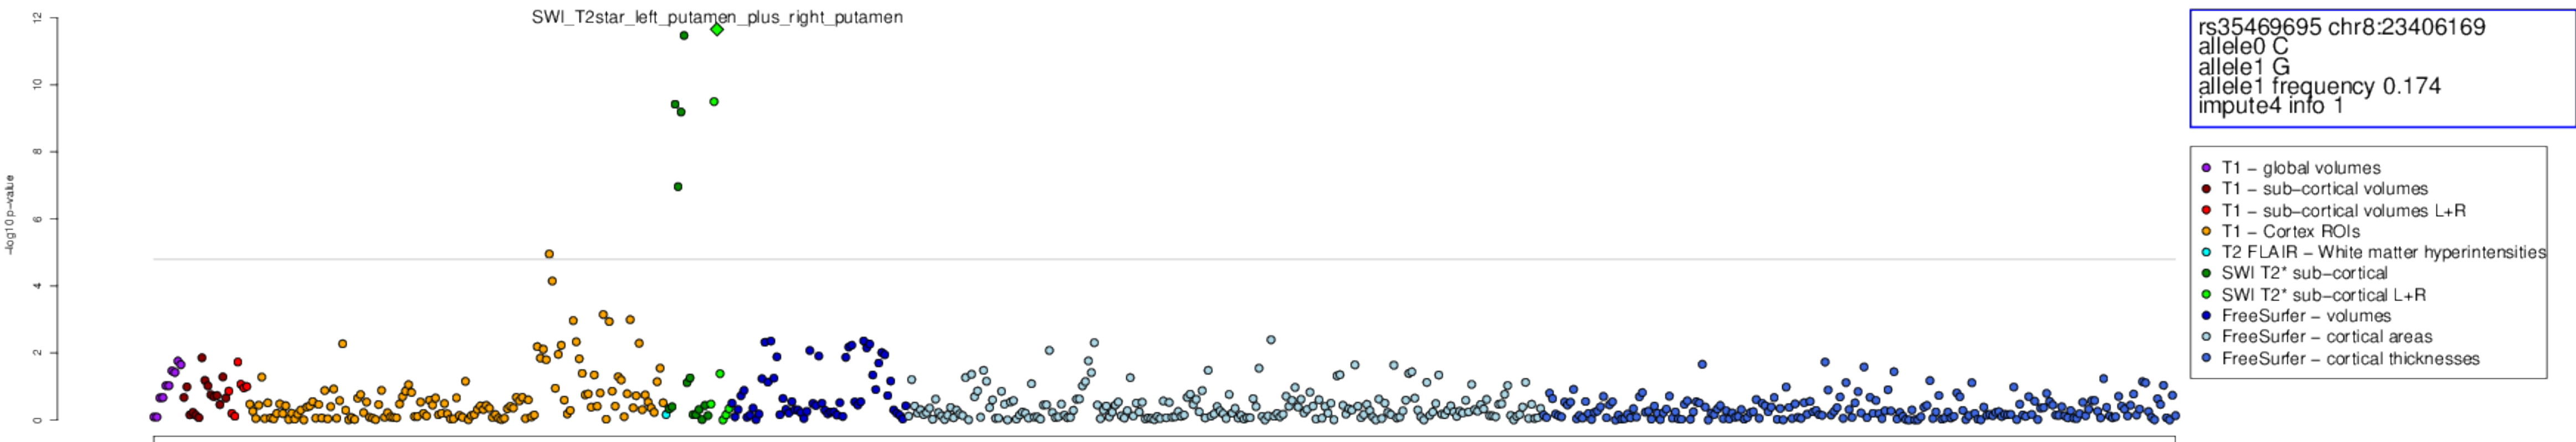

### Structural connectivity (Diffusion MRI)

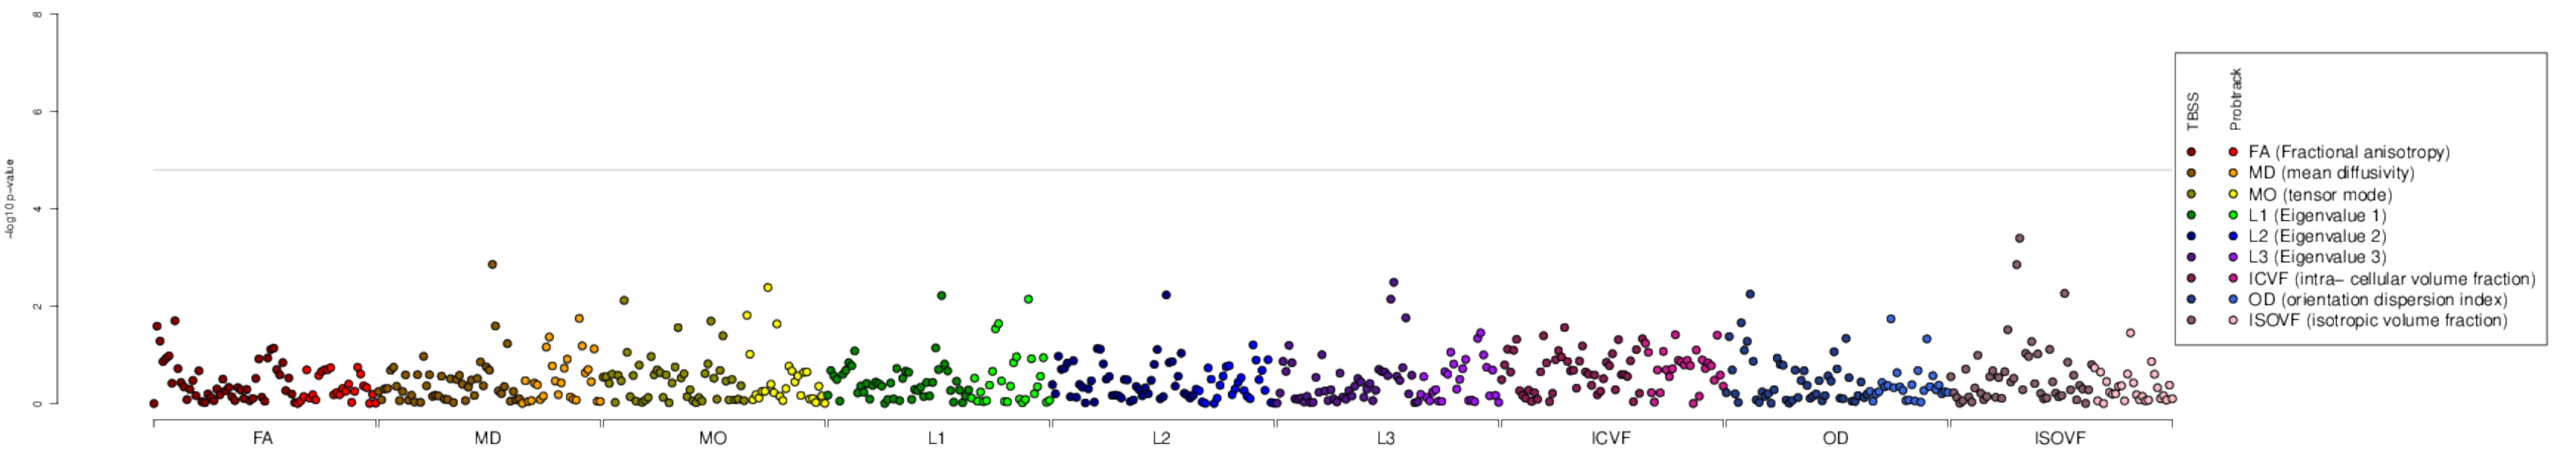

### functional MRI

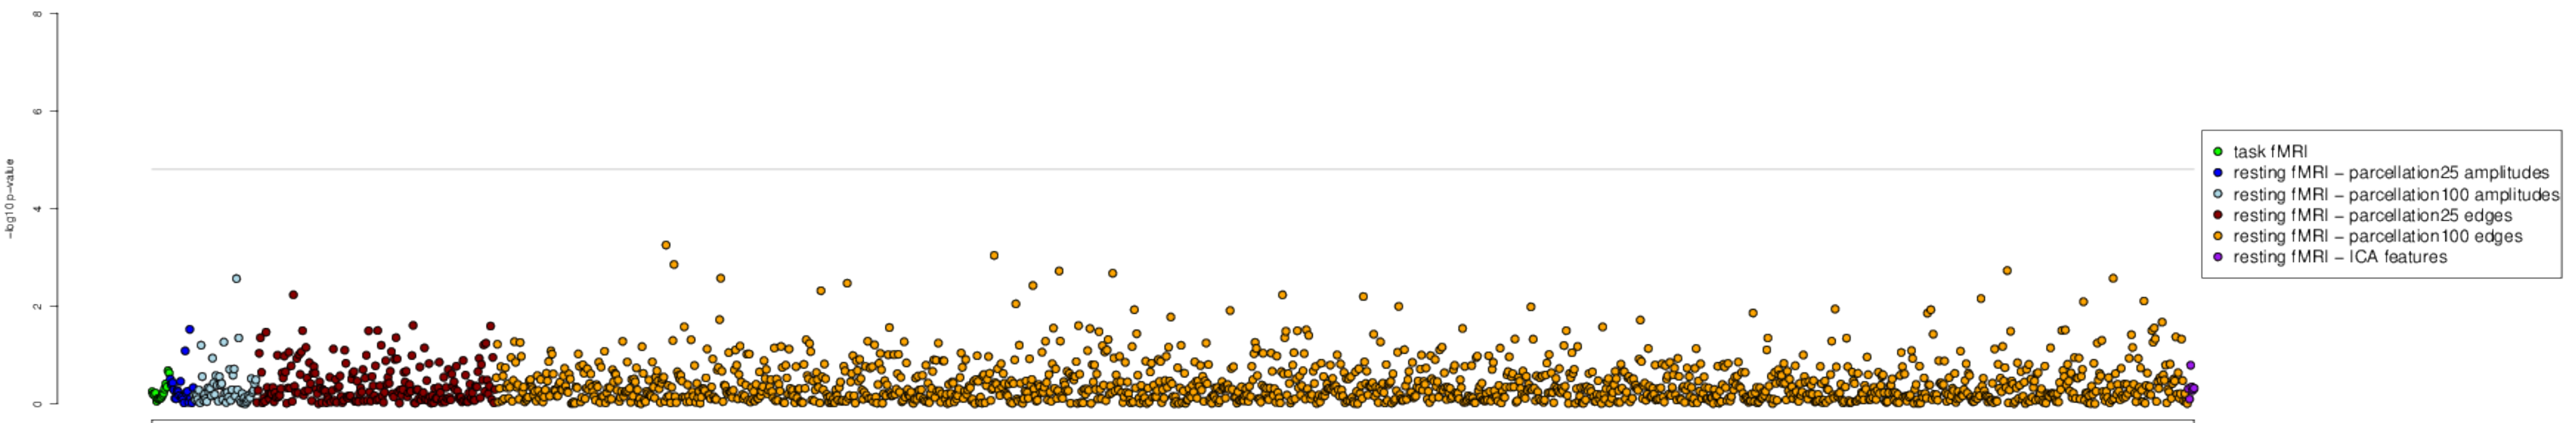

### Structural MRI

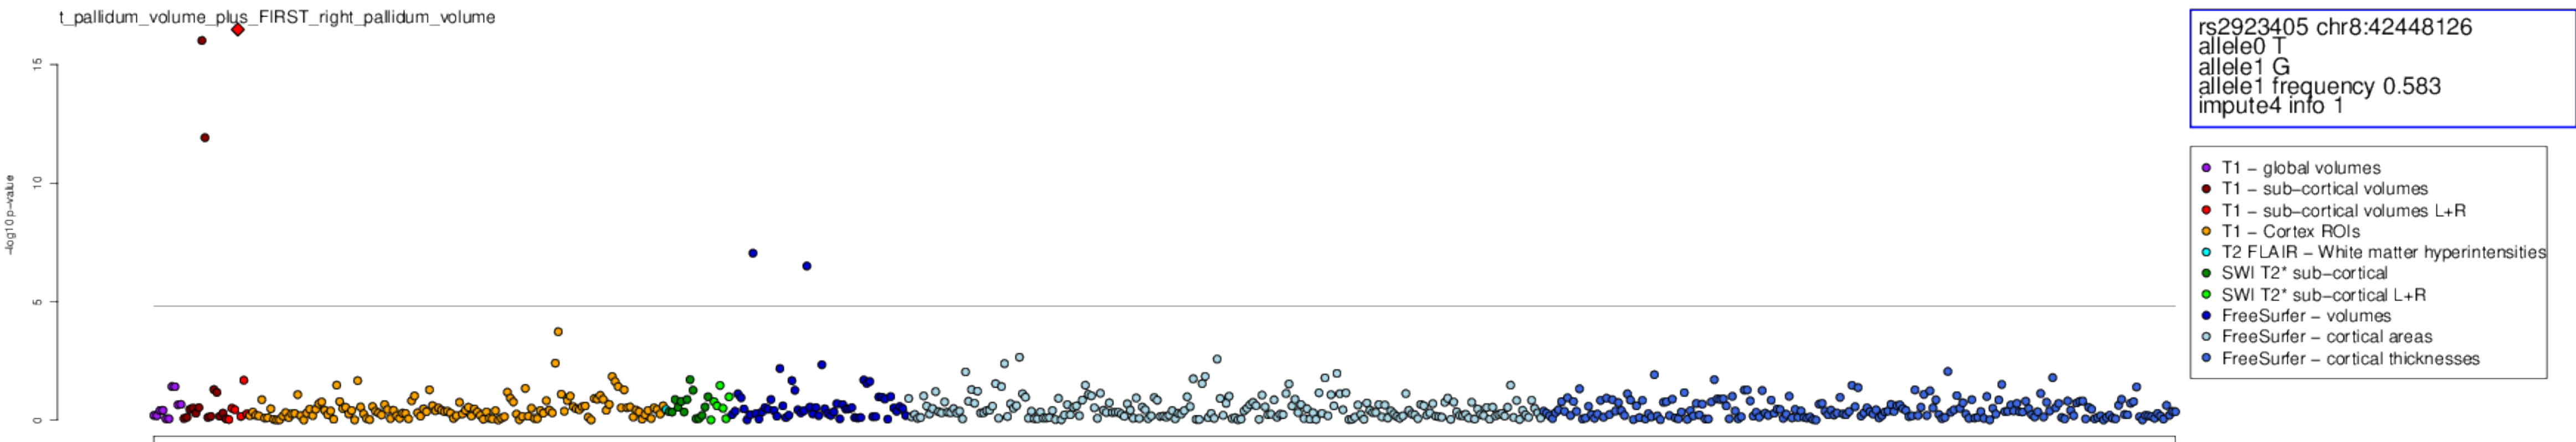

### Structural connectivity (Diffusion MRI)

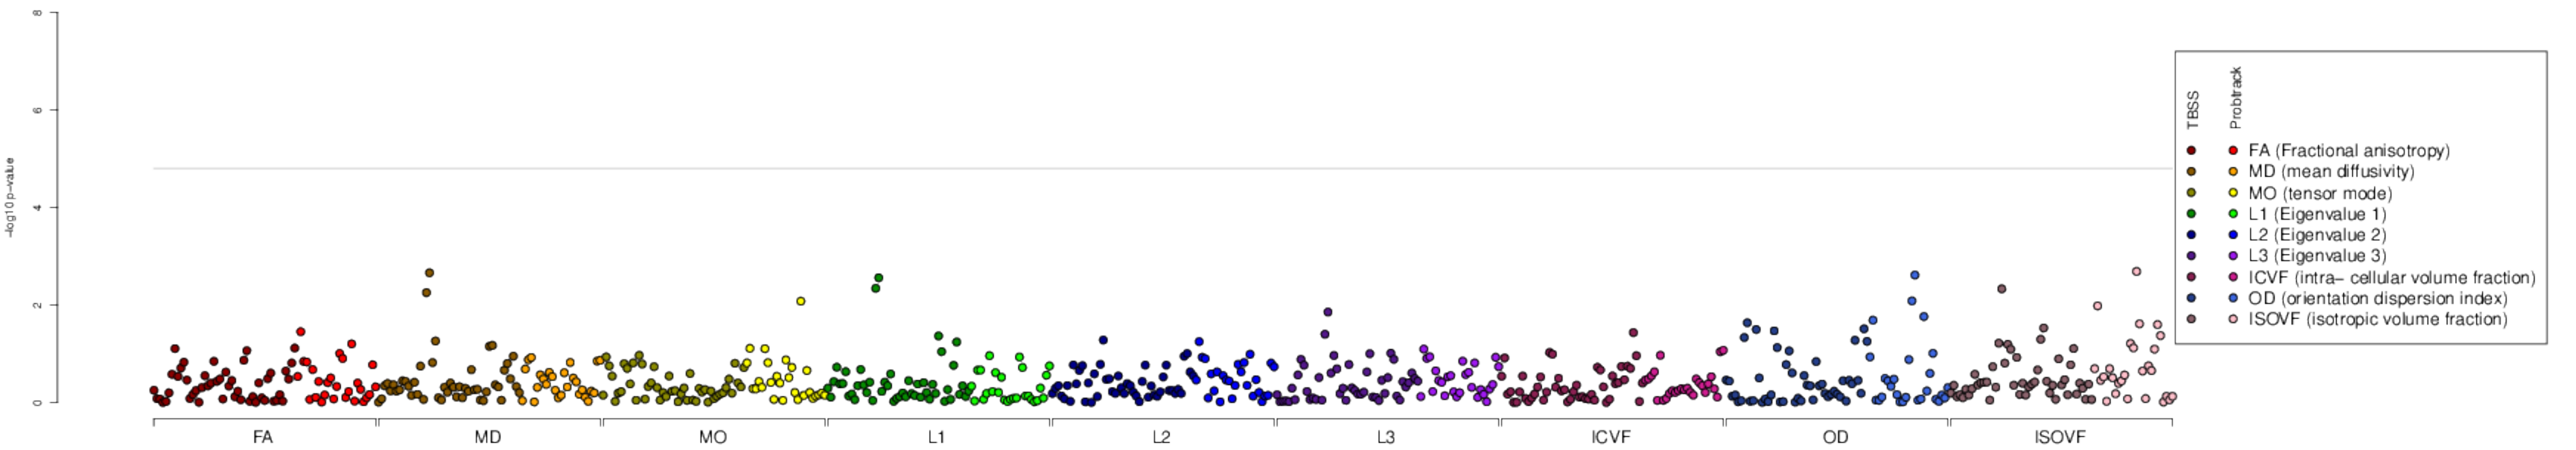

### functional MRI

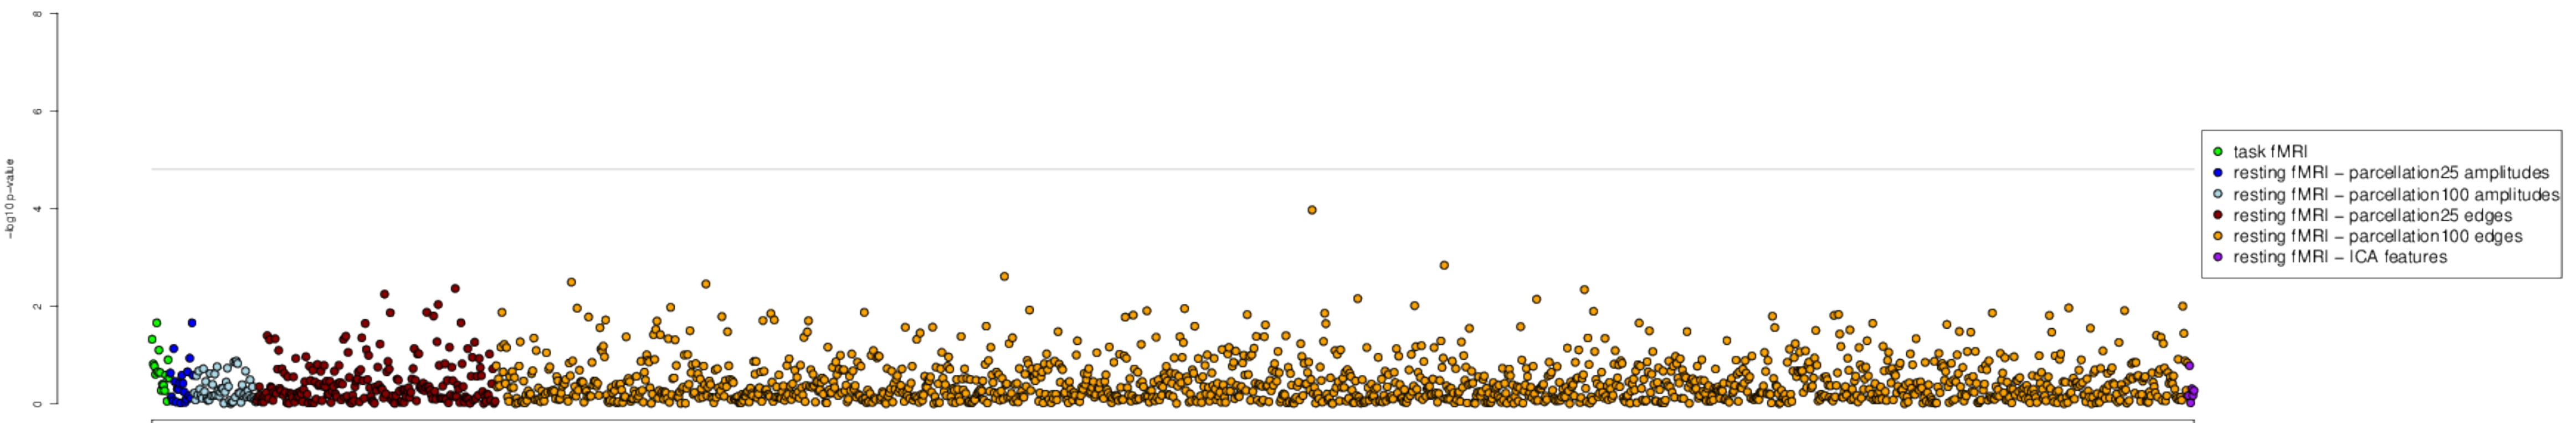

### Structural MRI

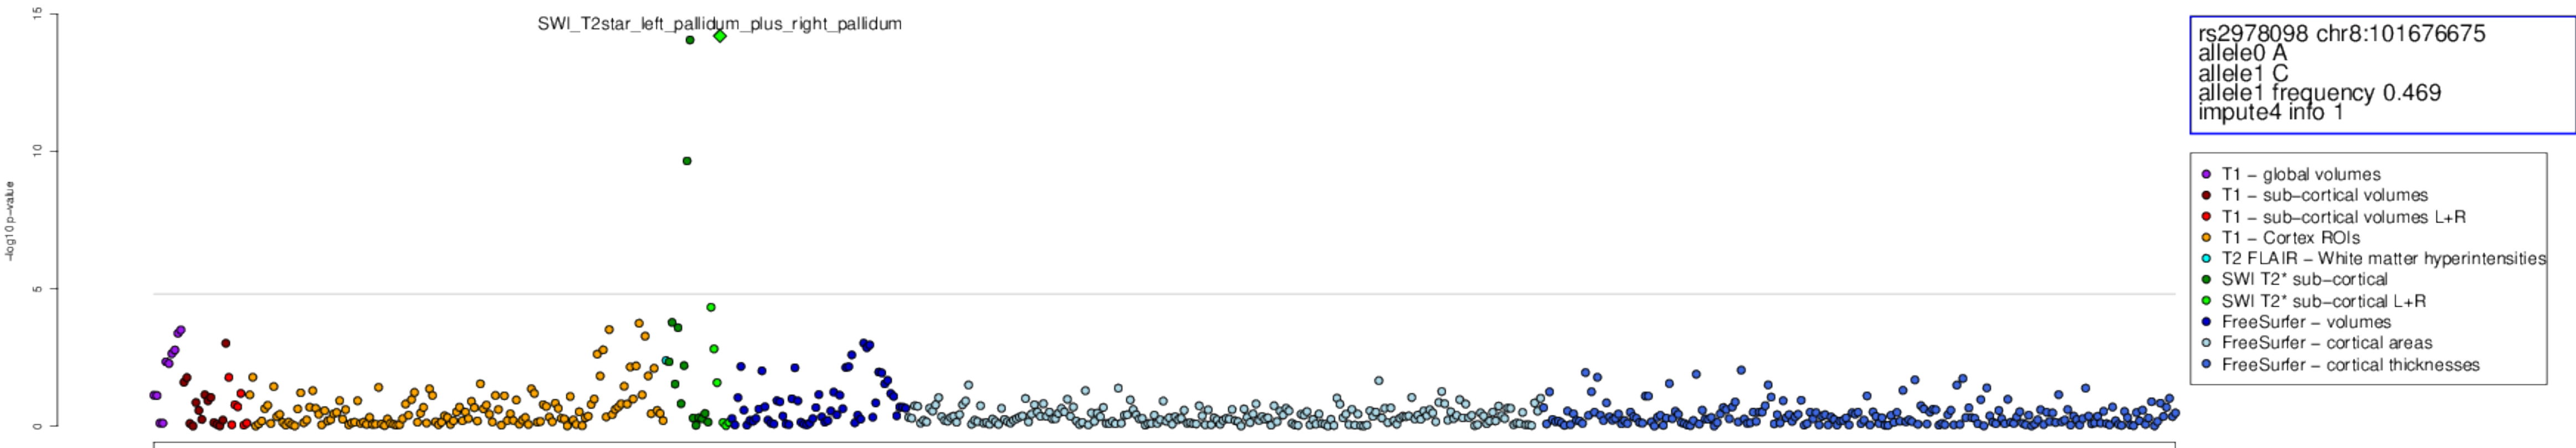

### Structural connectivity (Diffusion MRI)

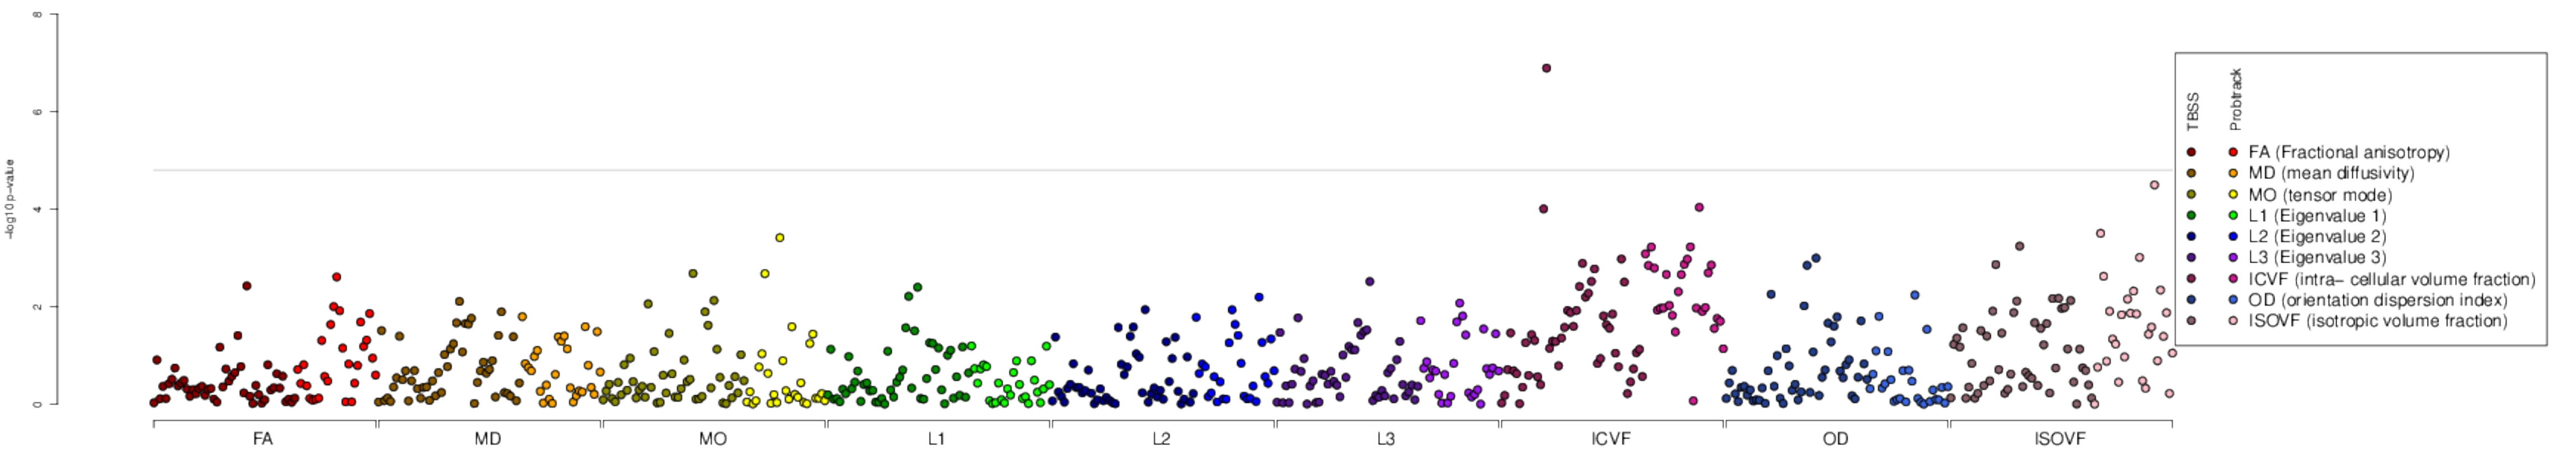

### functional MRI

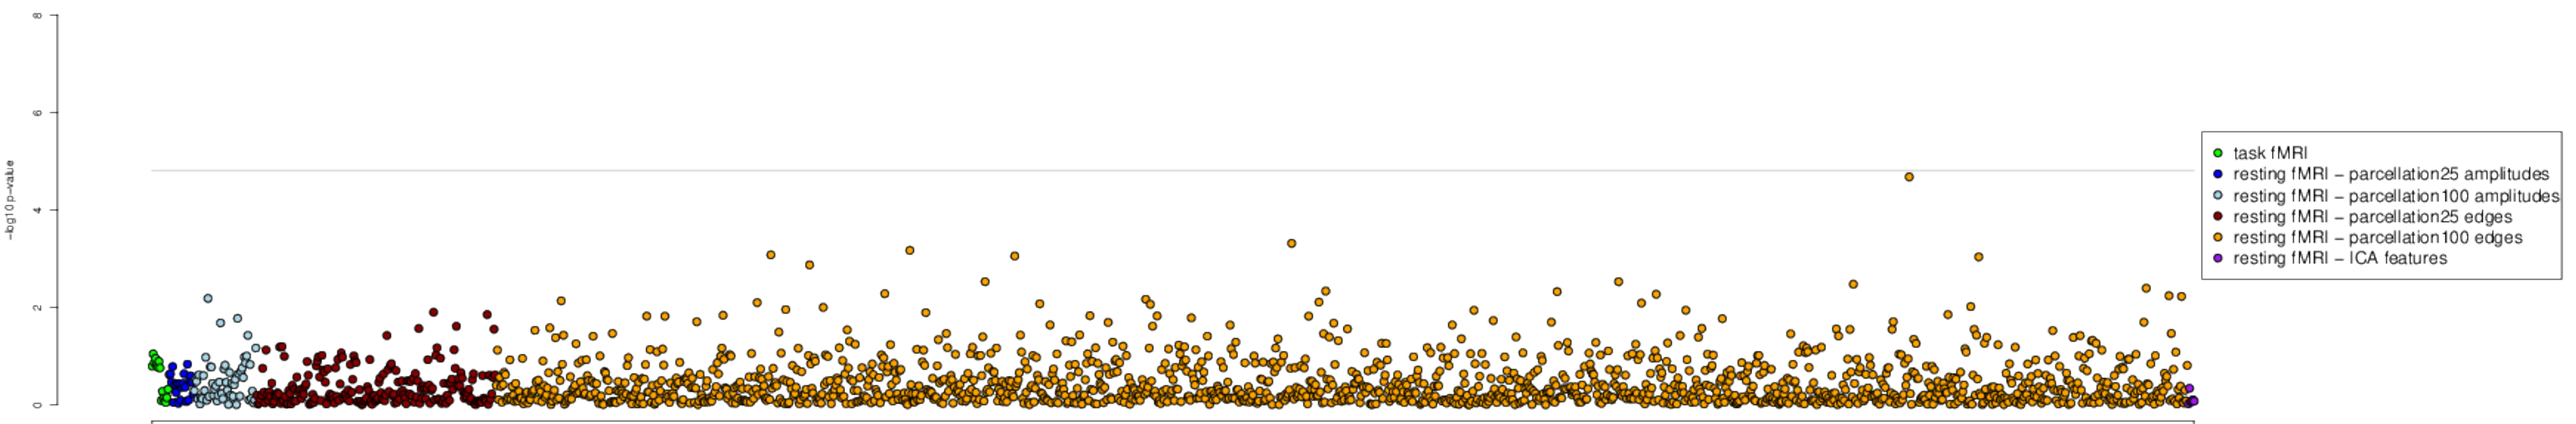

### Structural MRI

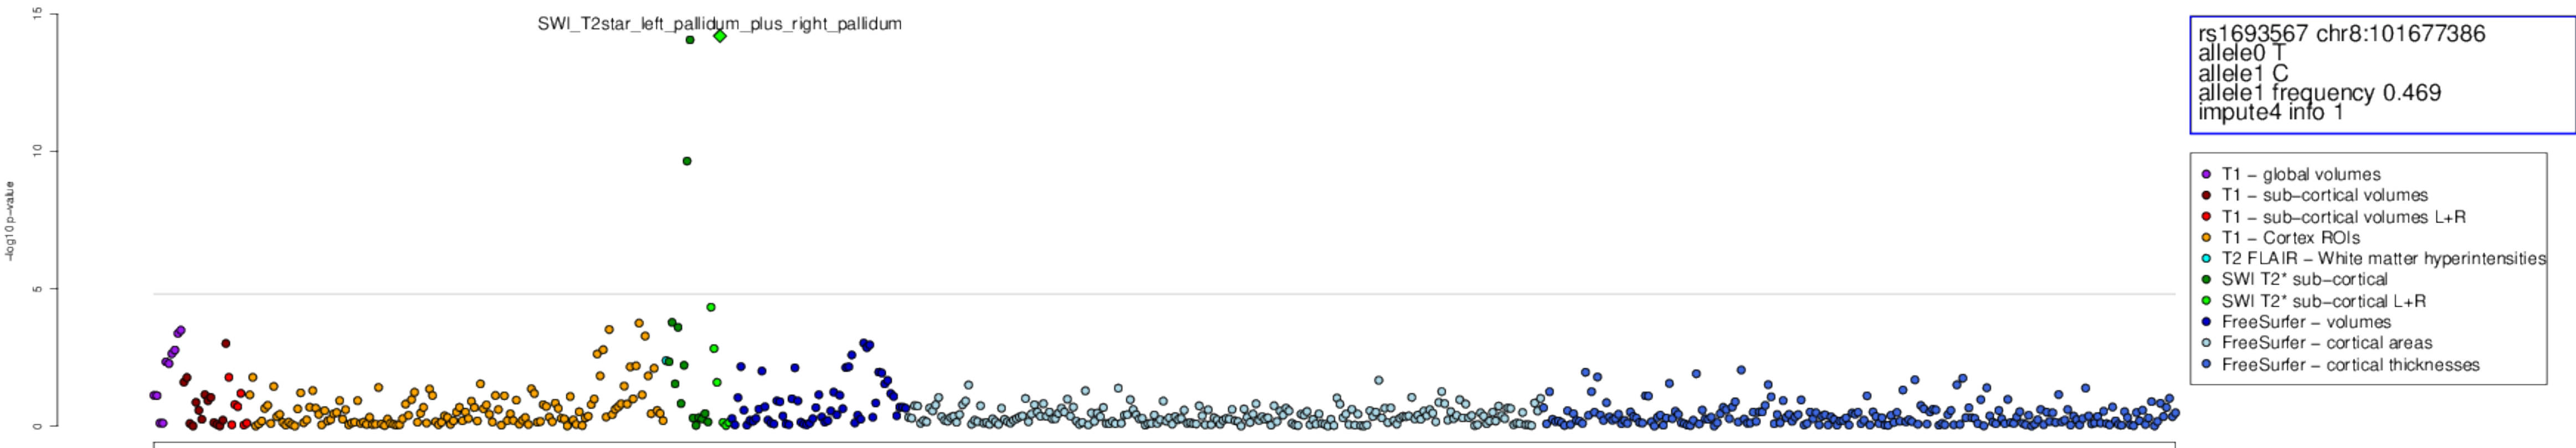

### Structural connectivity (Diffusion MRI)

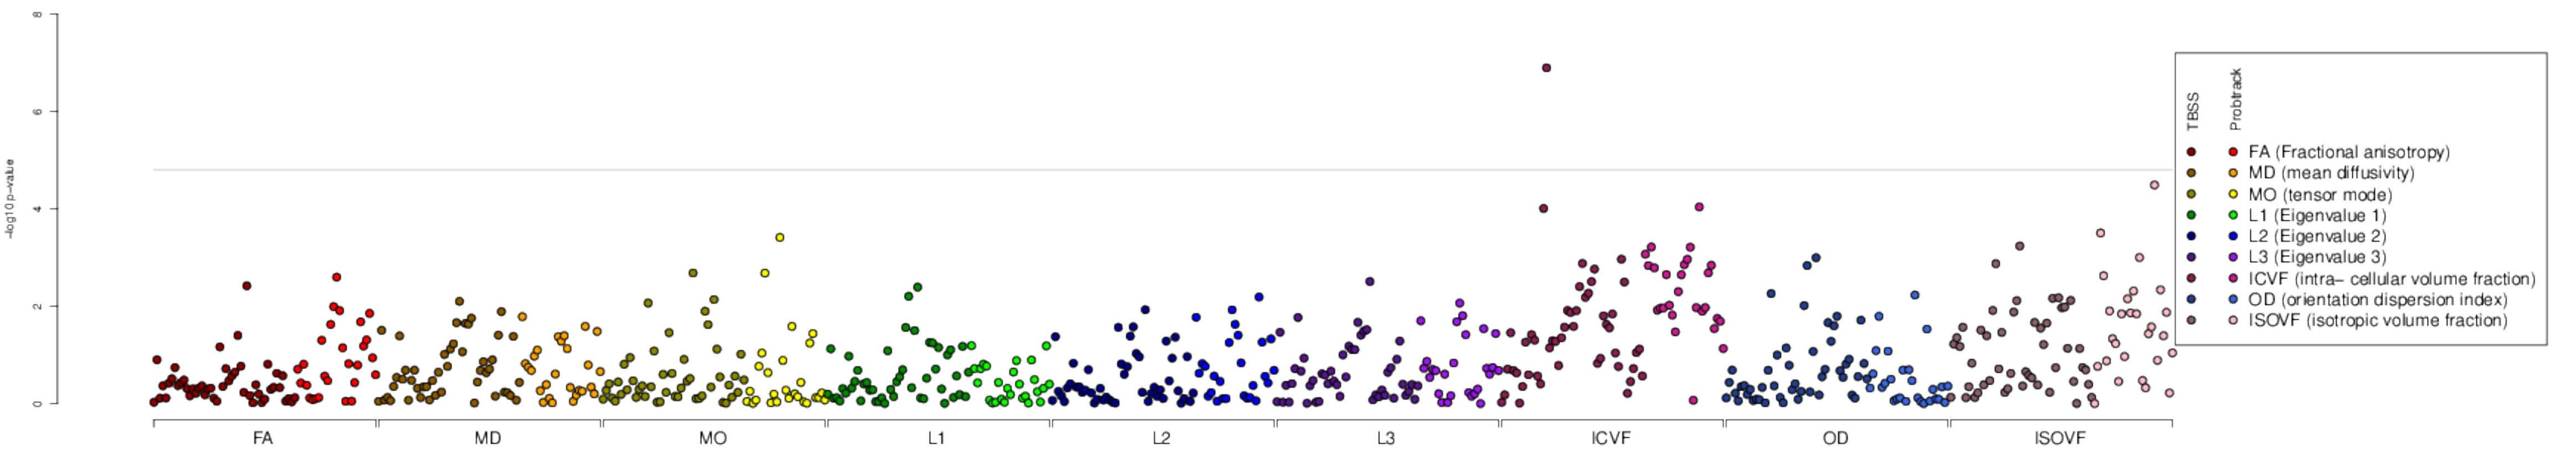

### functional MRI

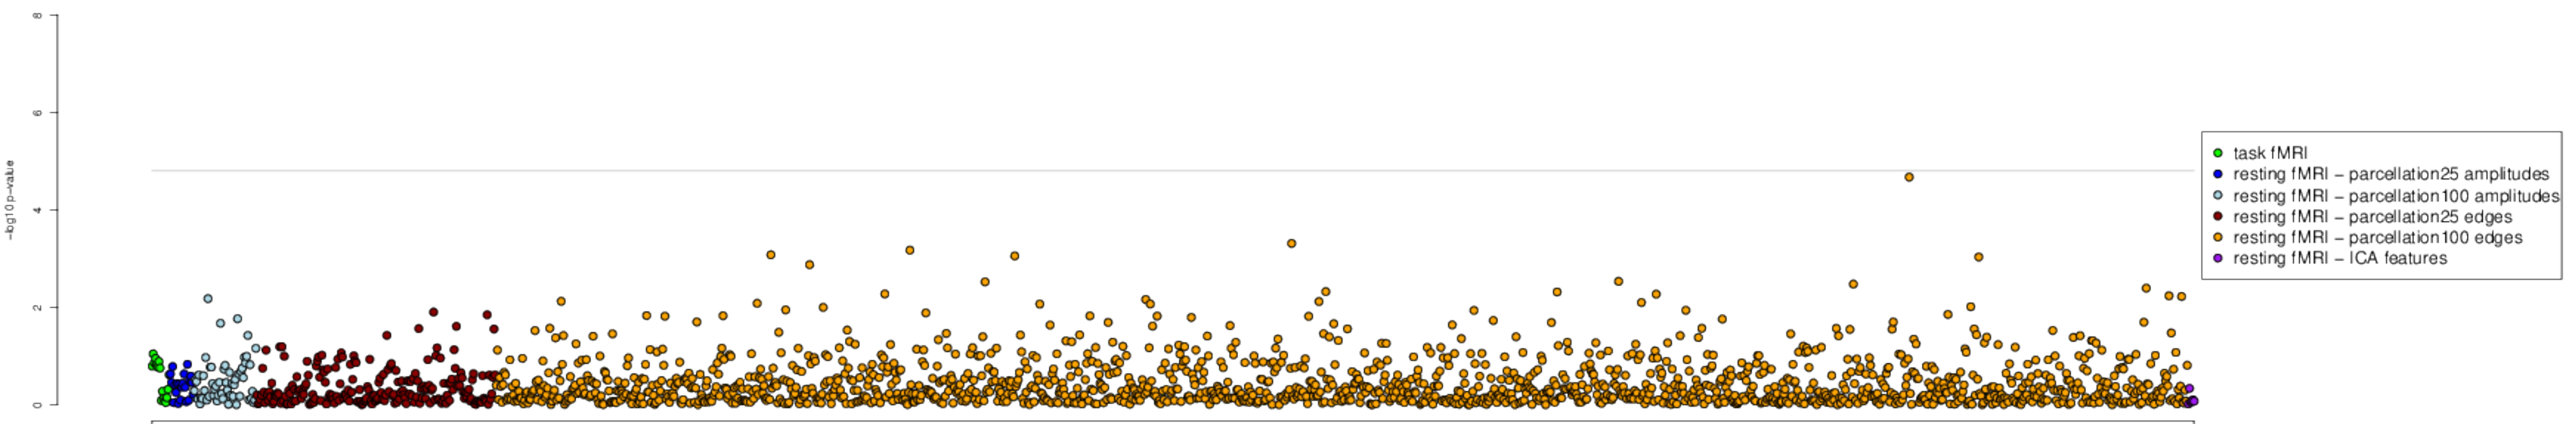

### Structural MRI

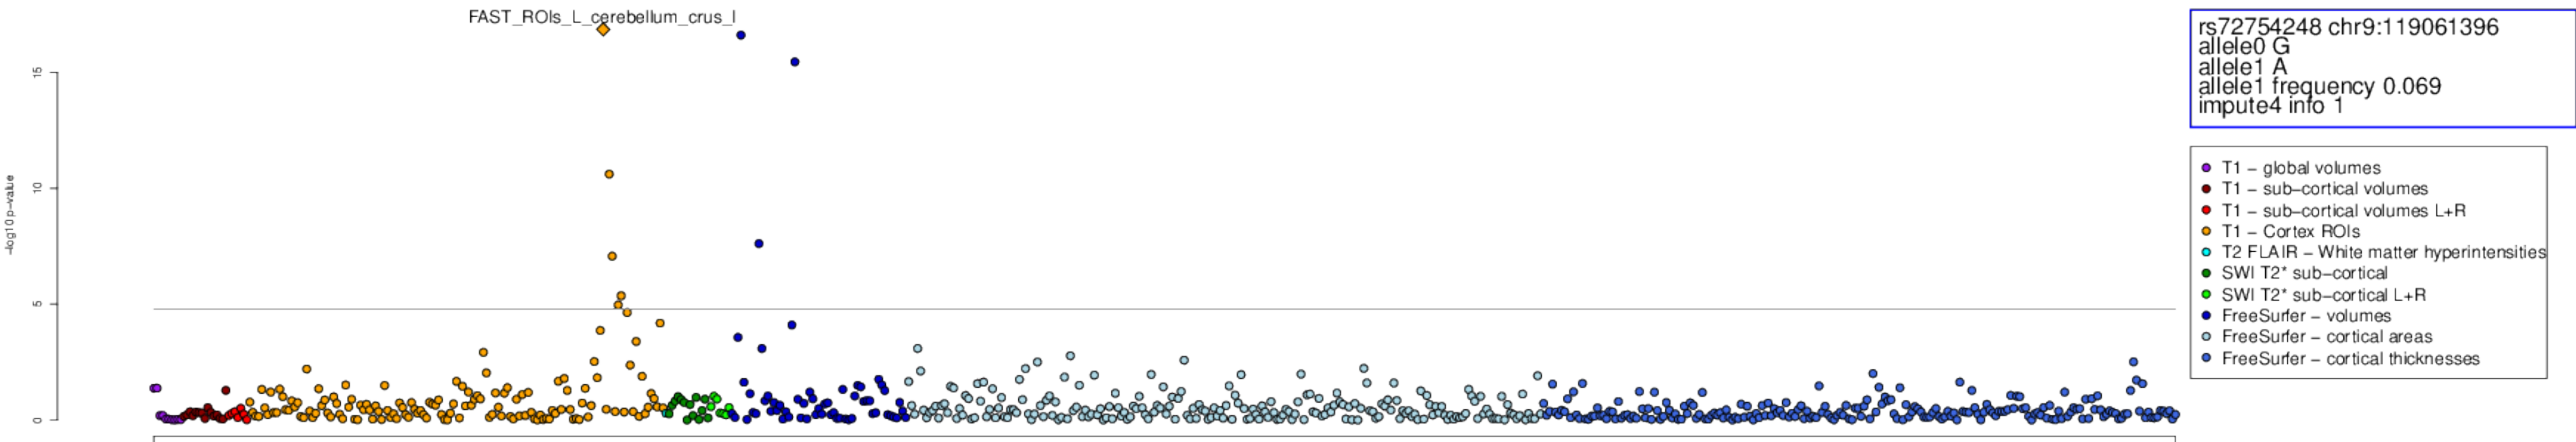

### Structural connectivity (Diffusion MRI)

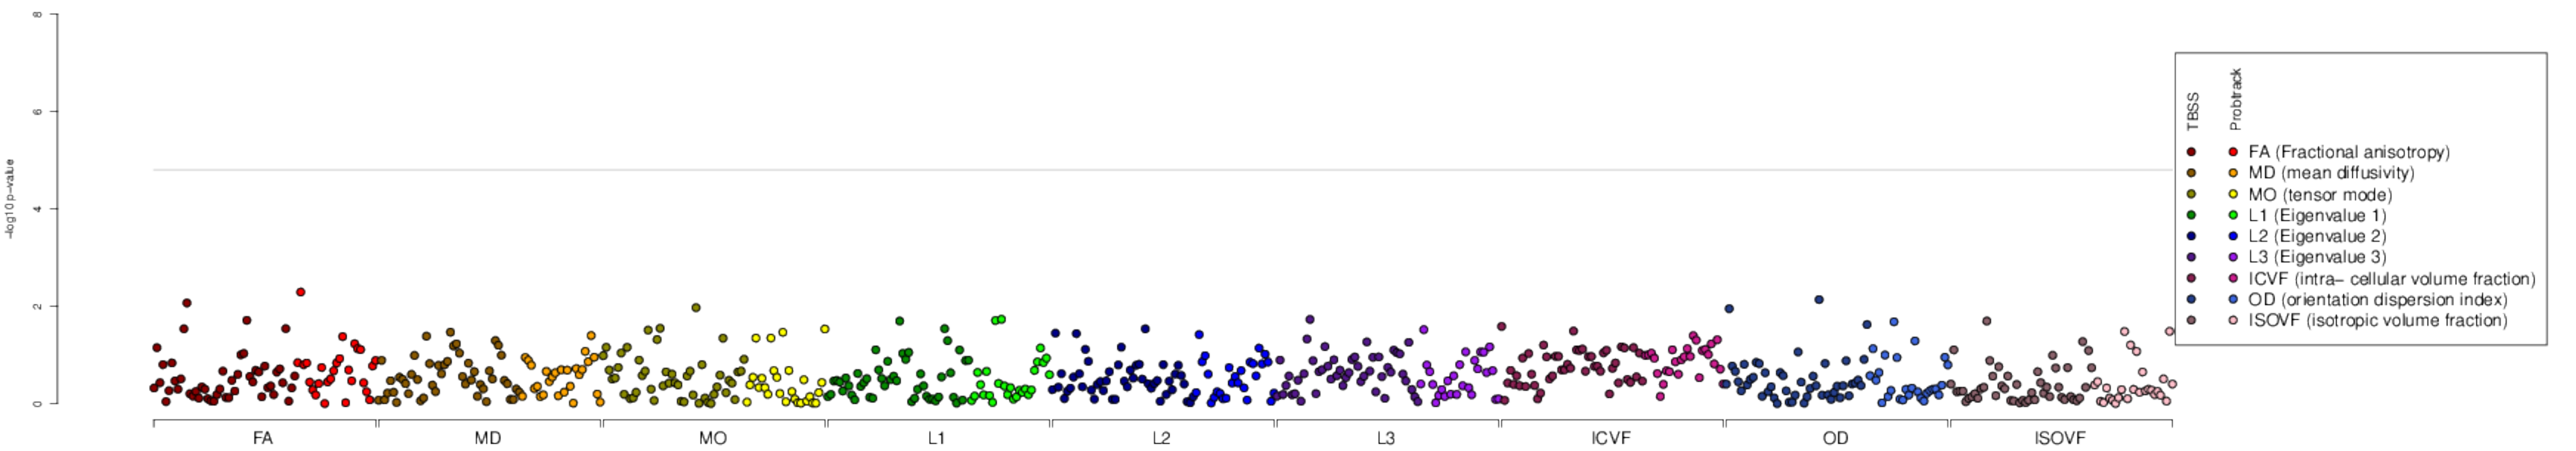

### functional MRI

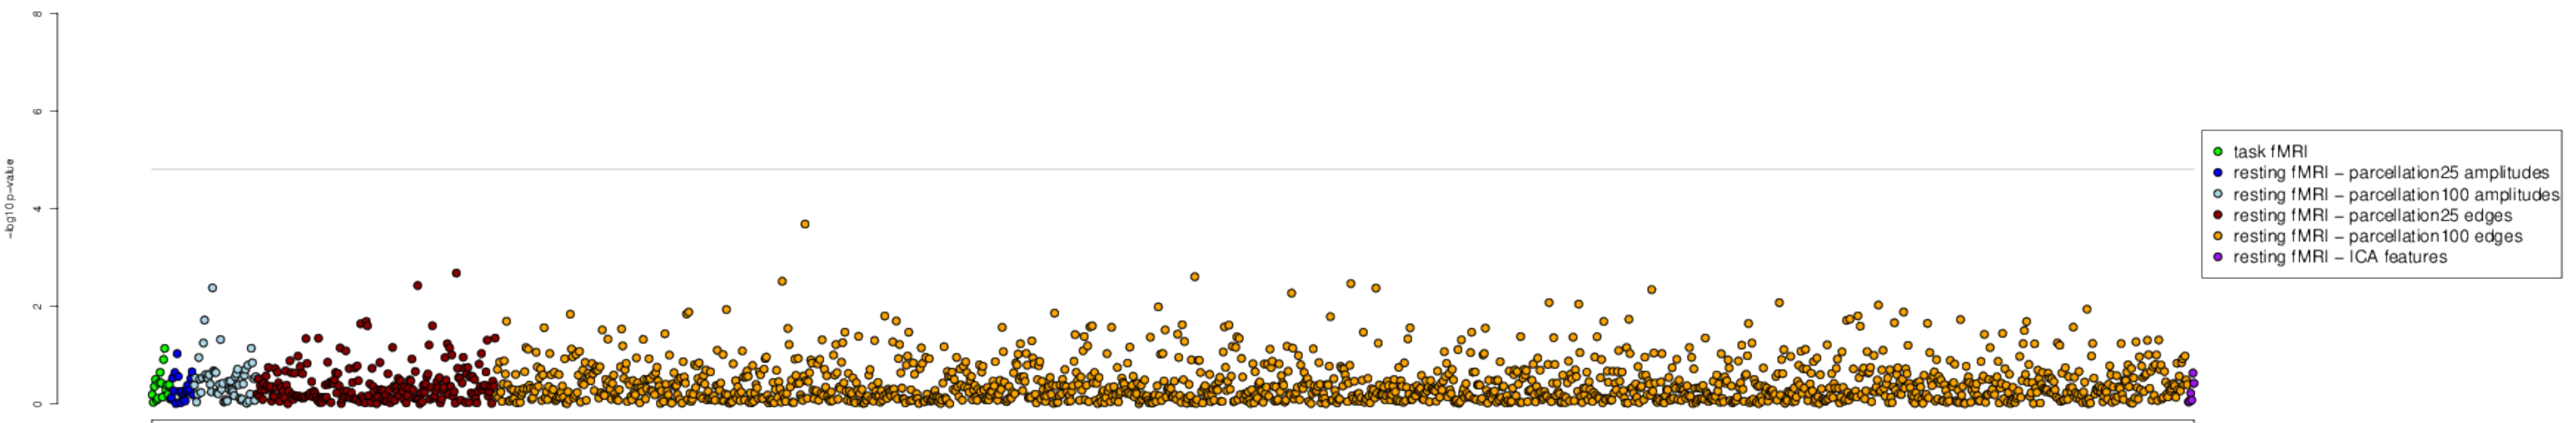

### Structural MRI

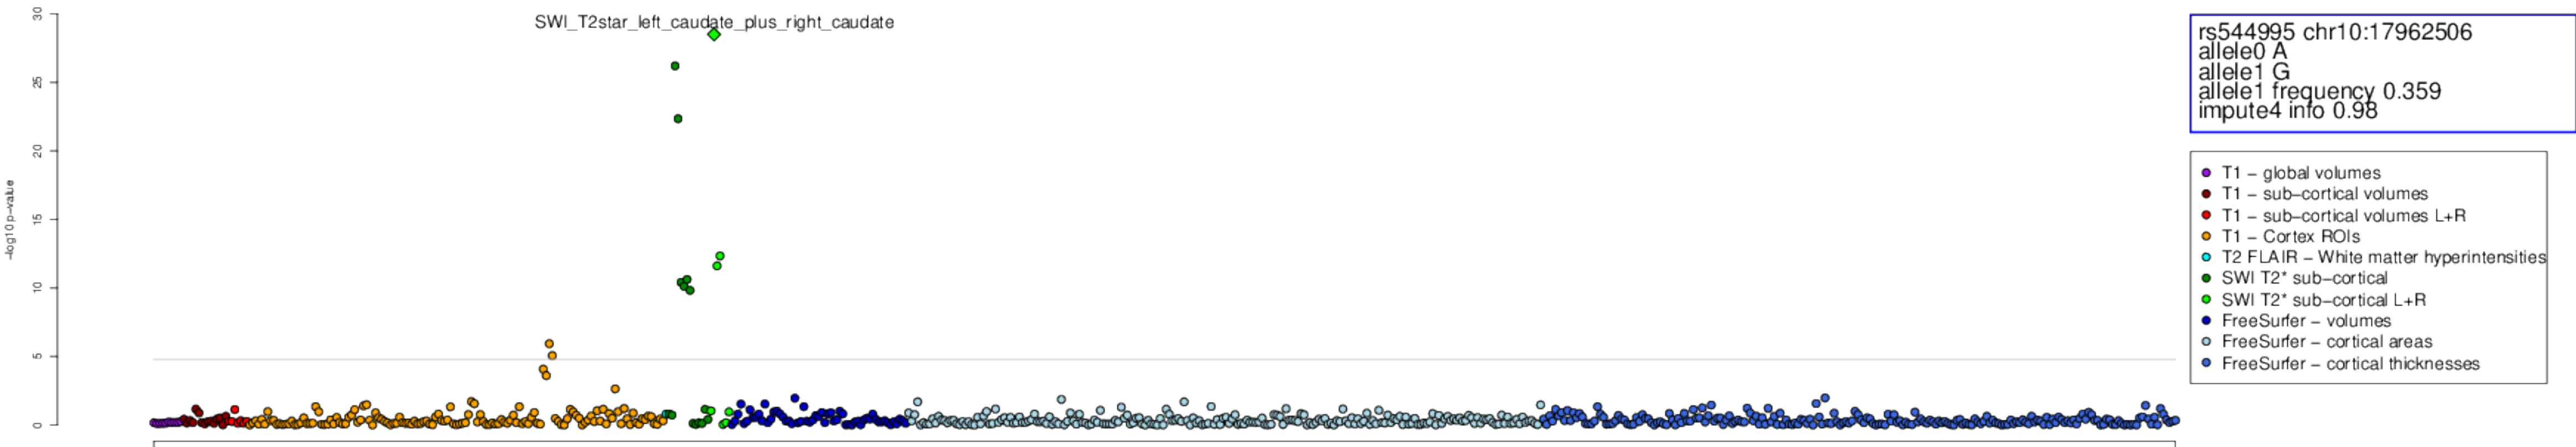

### Structural connectivity (Diffusion MRI)

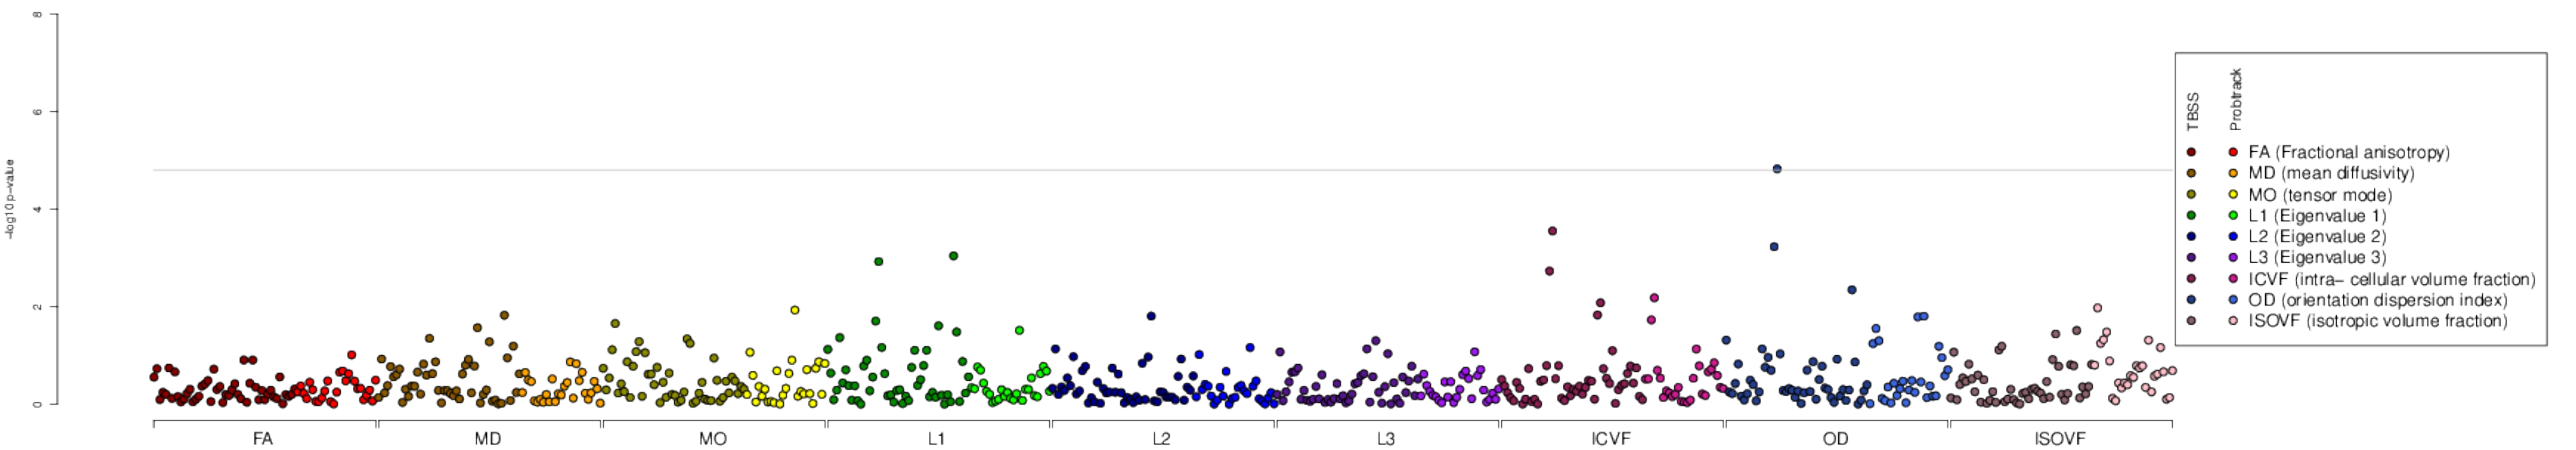

### functional MRI

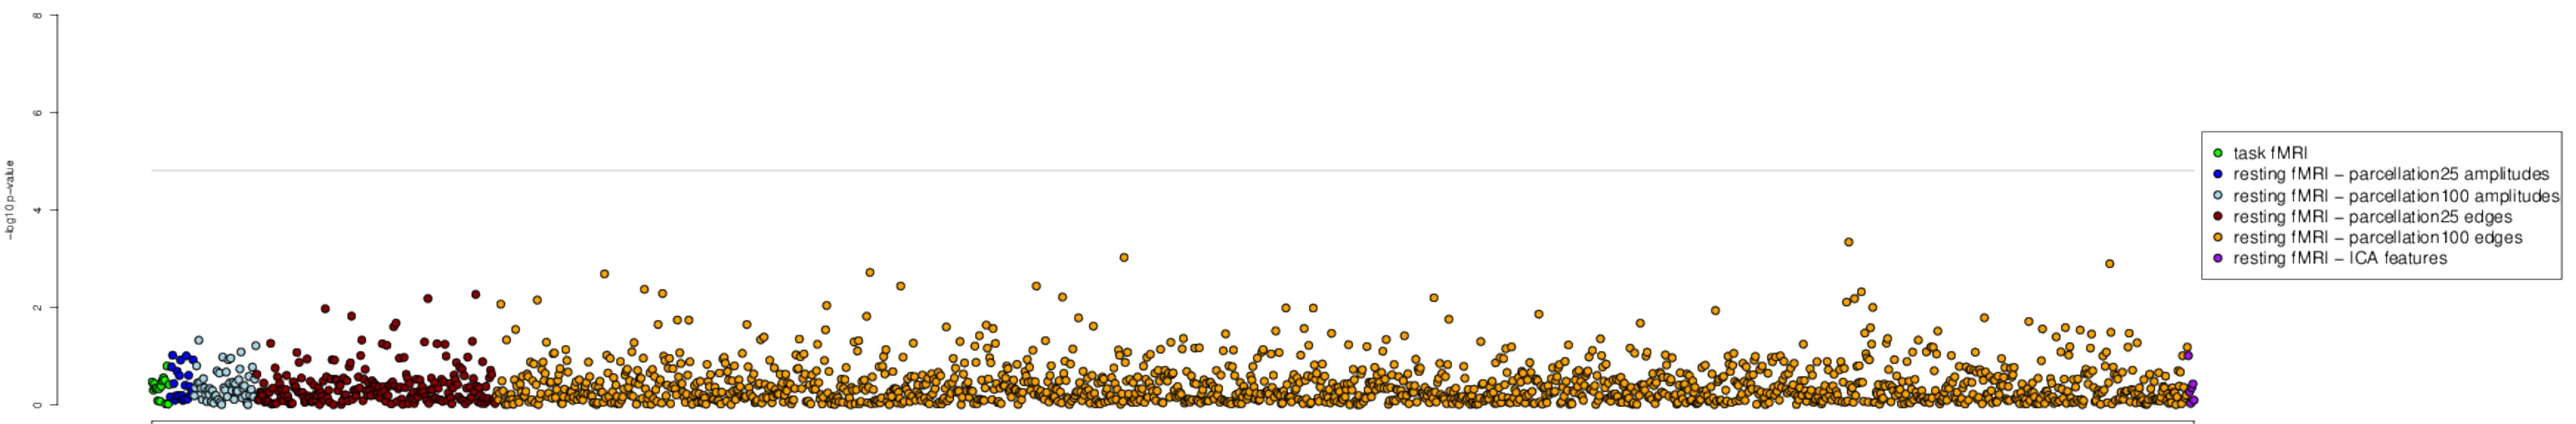

### Structural MRI

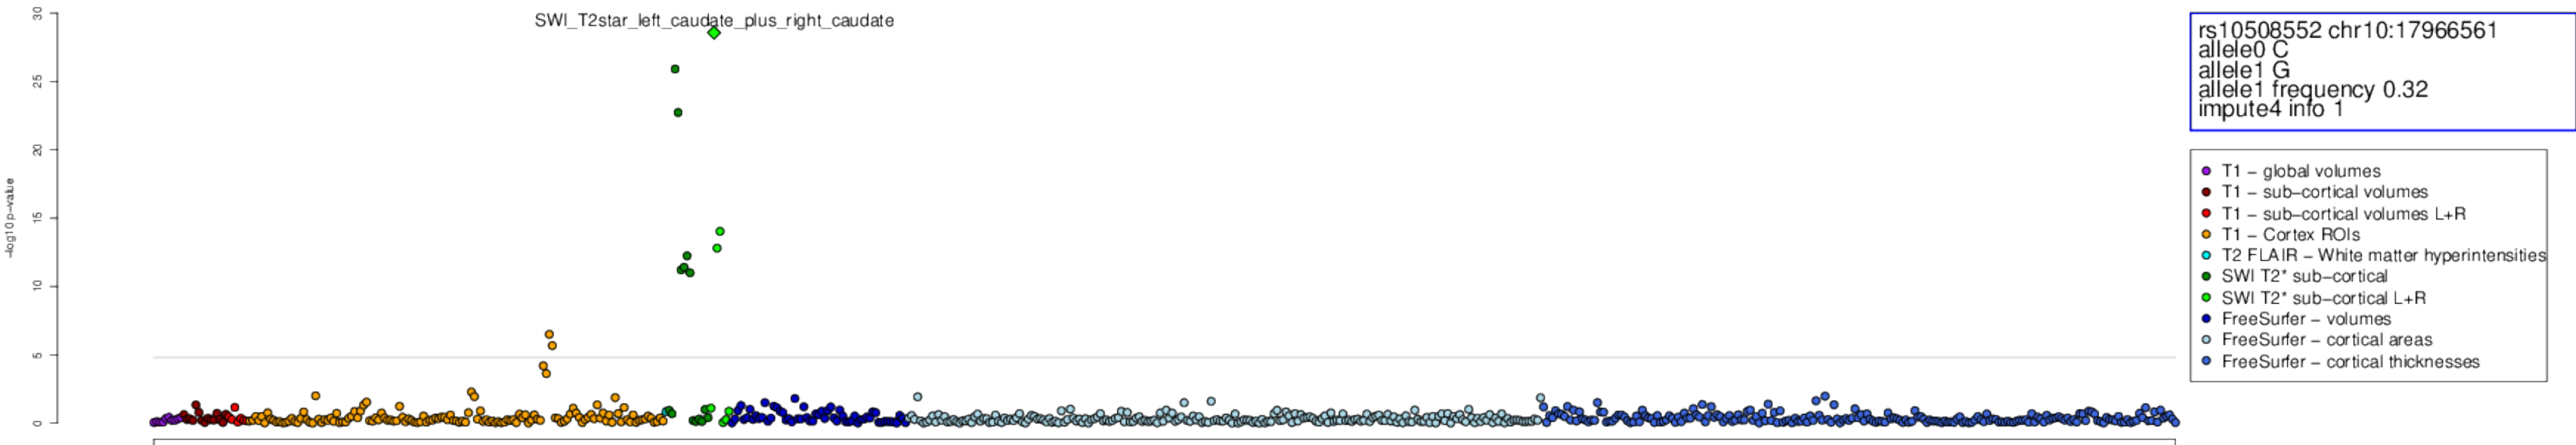

### Structural connectivity (Diffusion MRI)

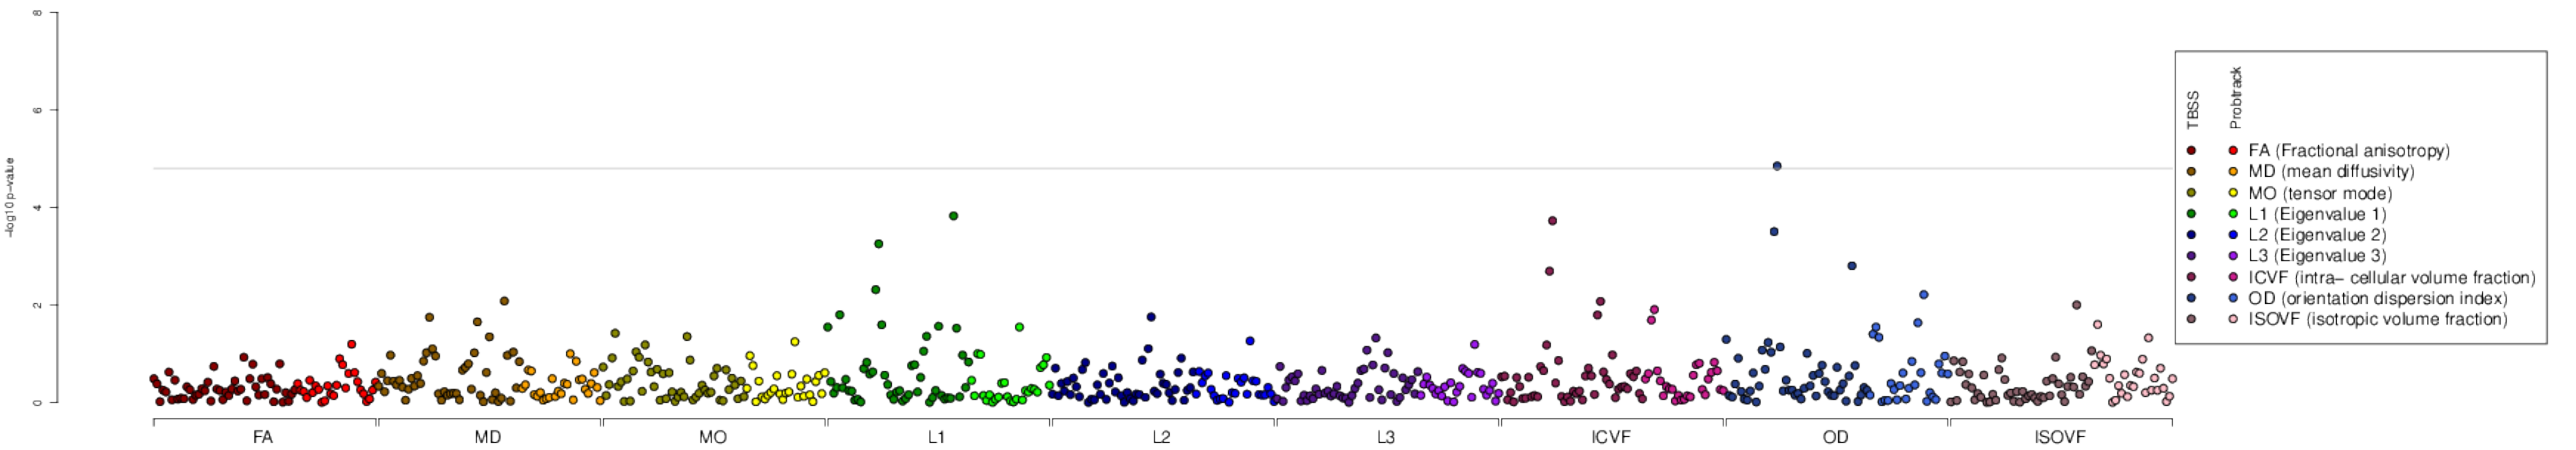

### functional MRI

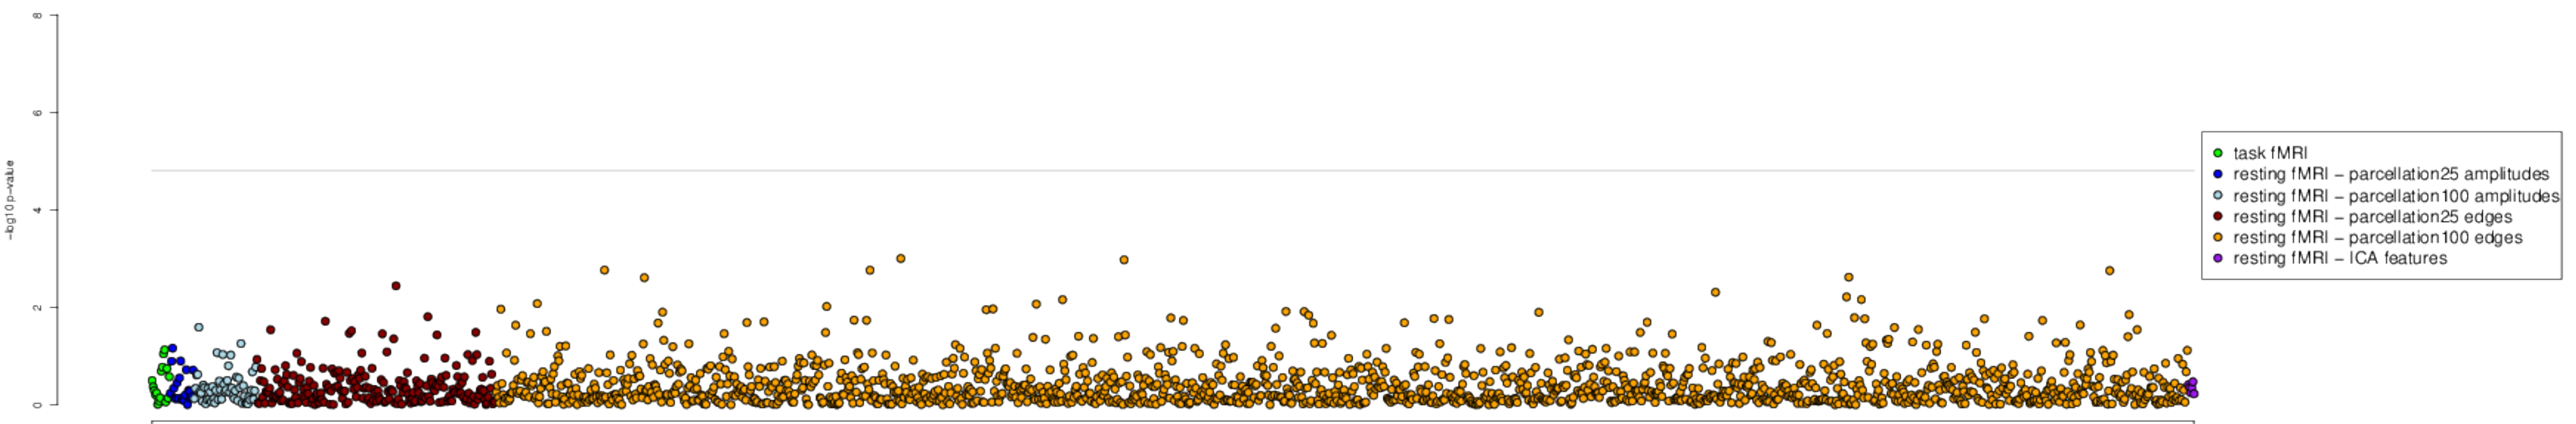



### Structural MRI

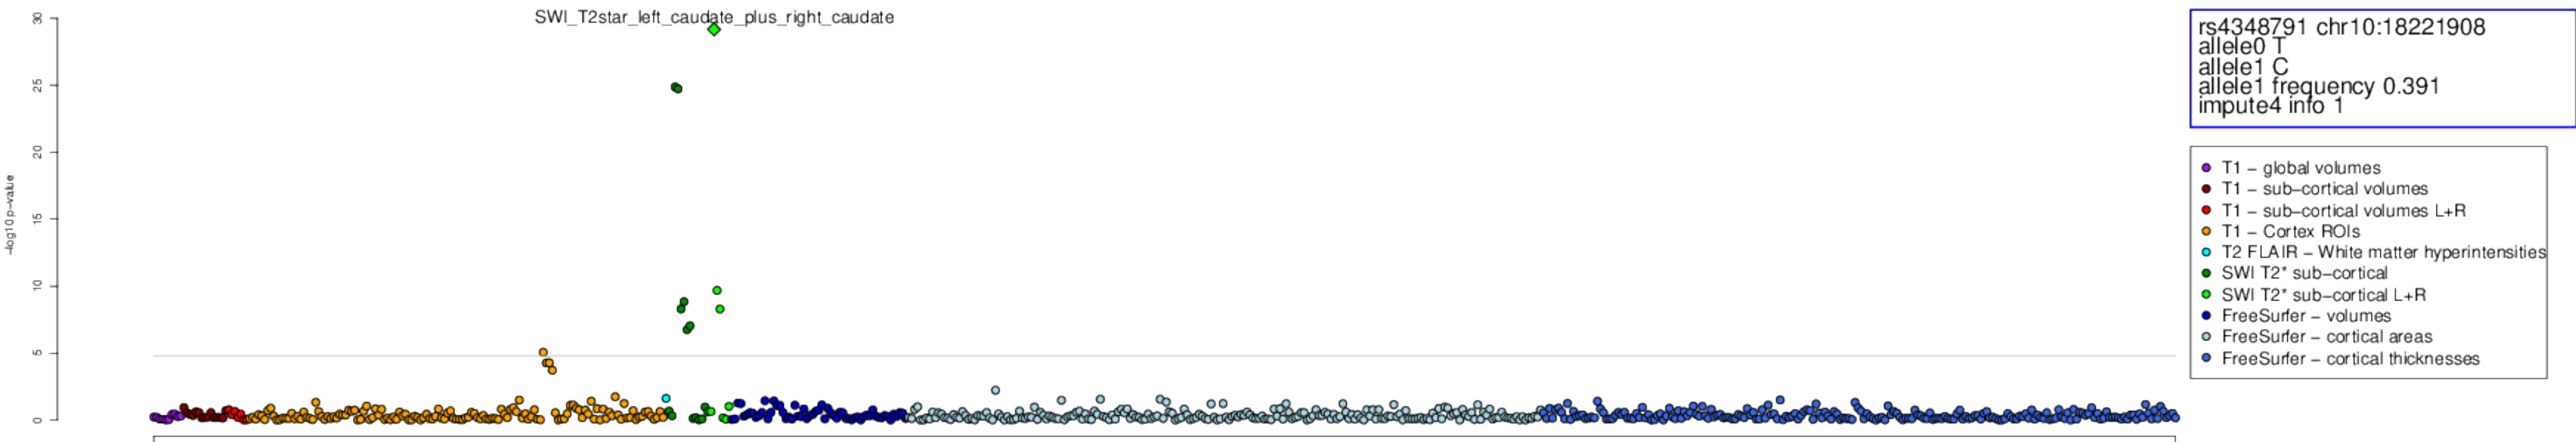

### Structural connectivity (Diffusion MRI)

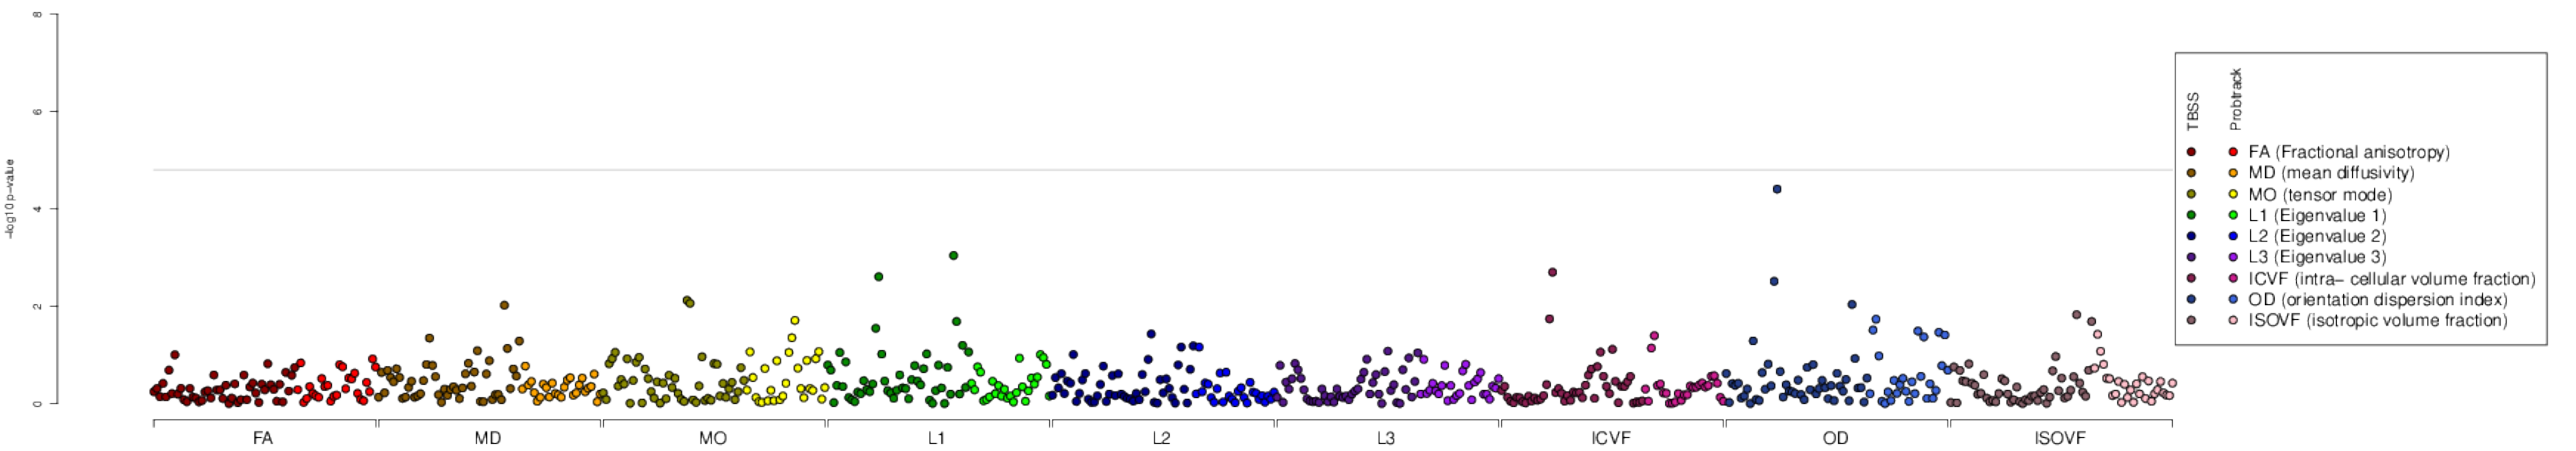

### functional MRI

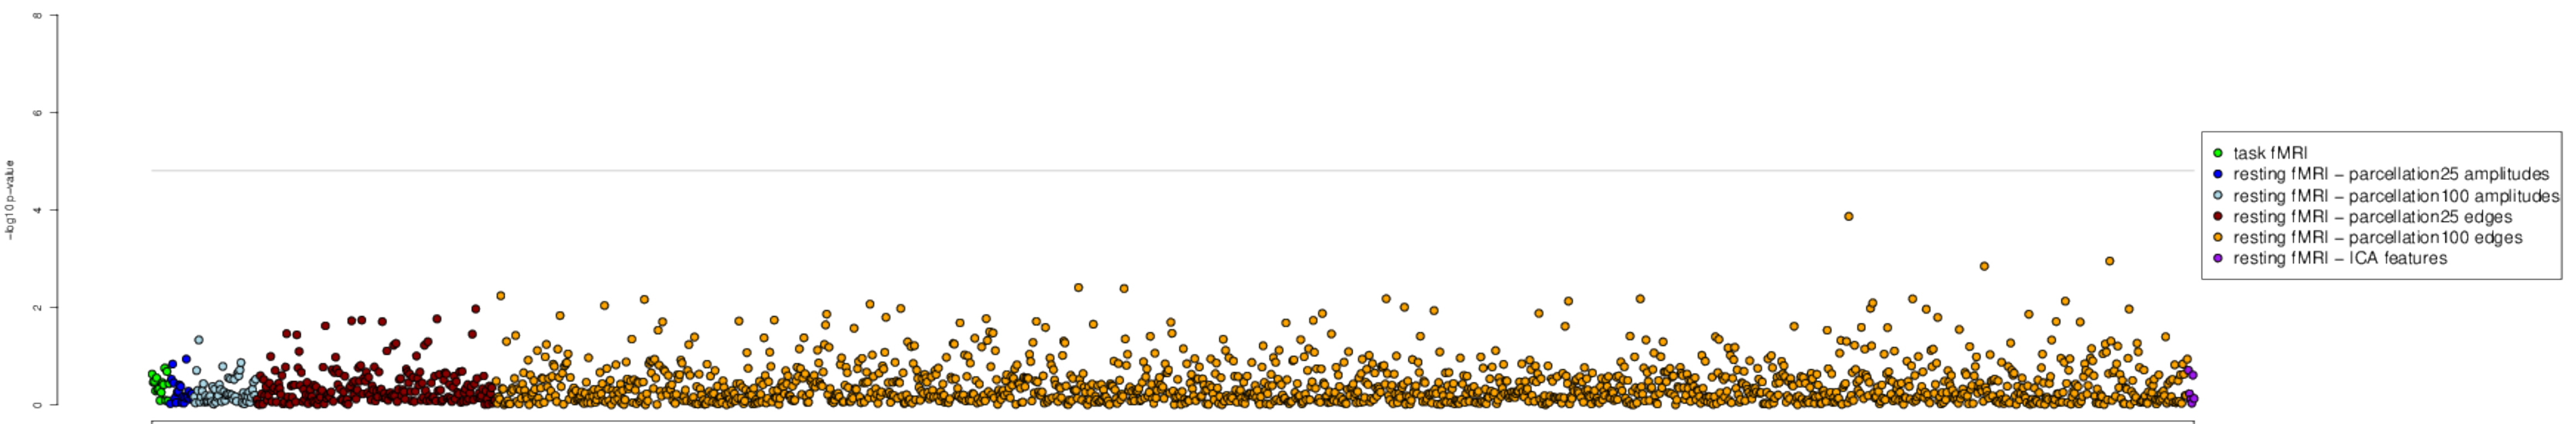

### Structural MRI

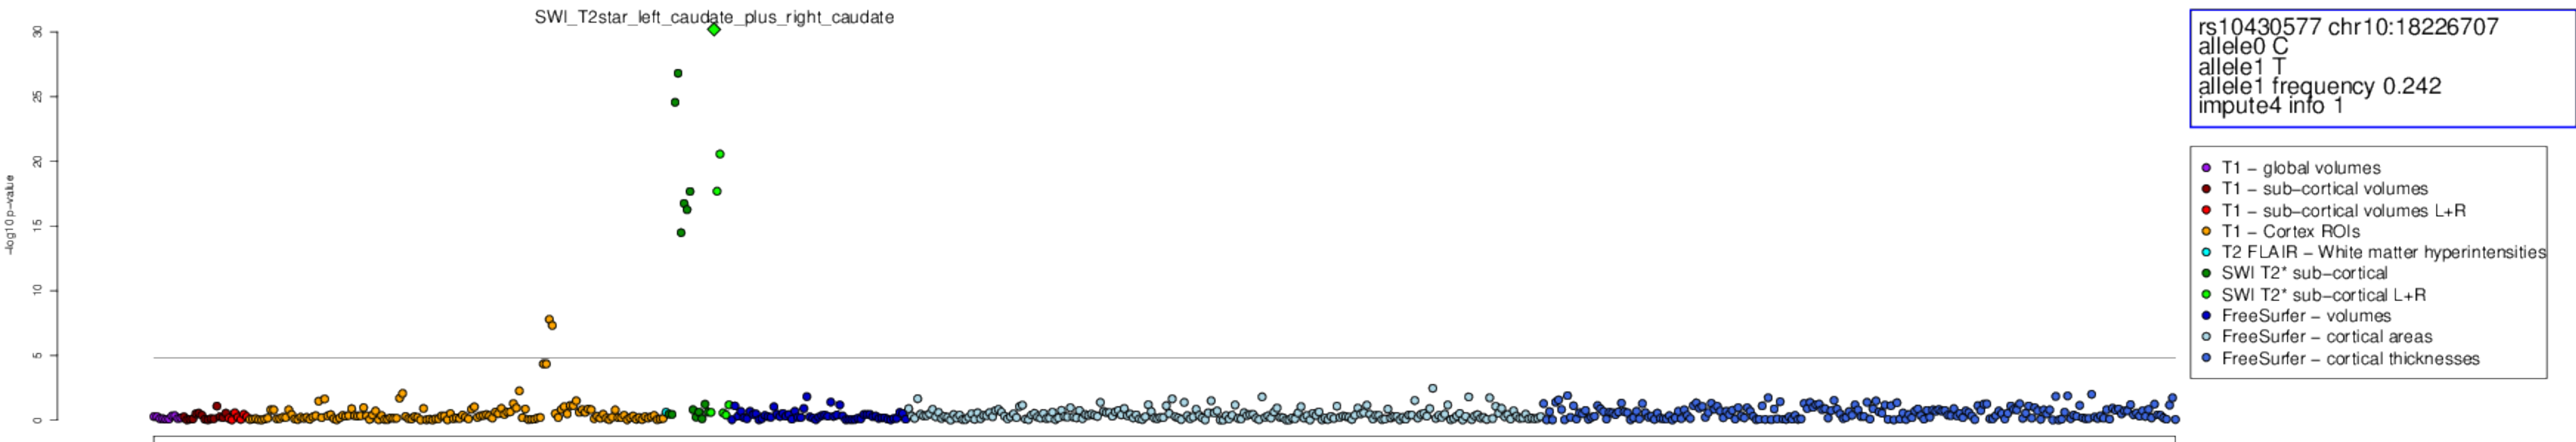

### Structural connectivity (Diffusion MRI)

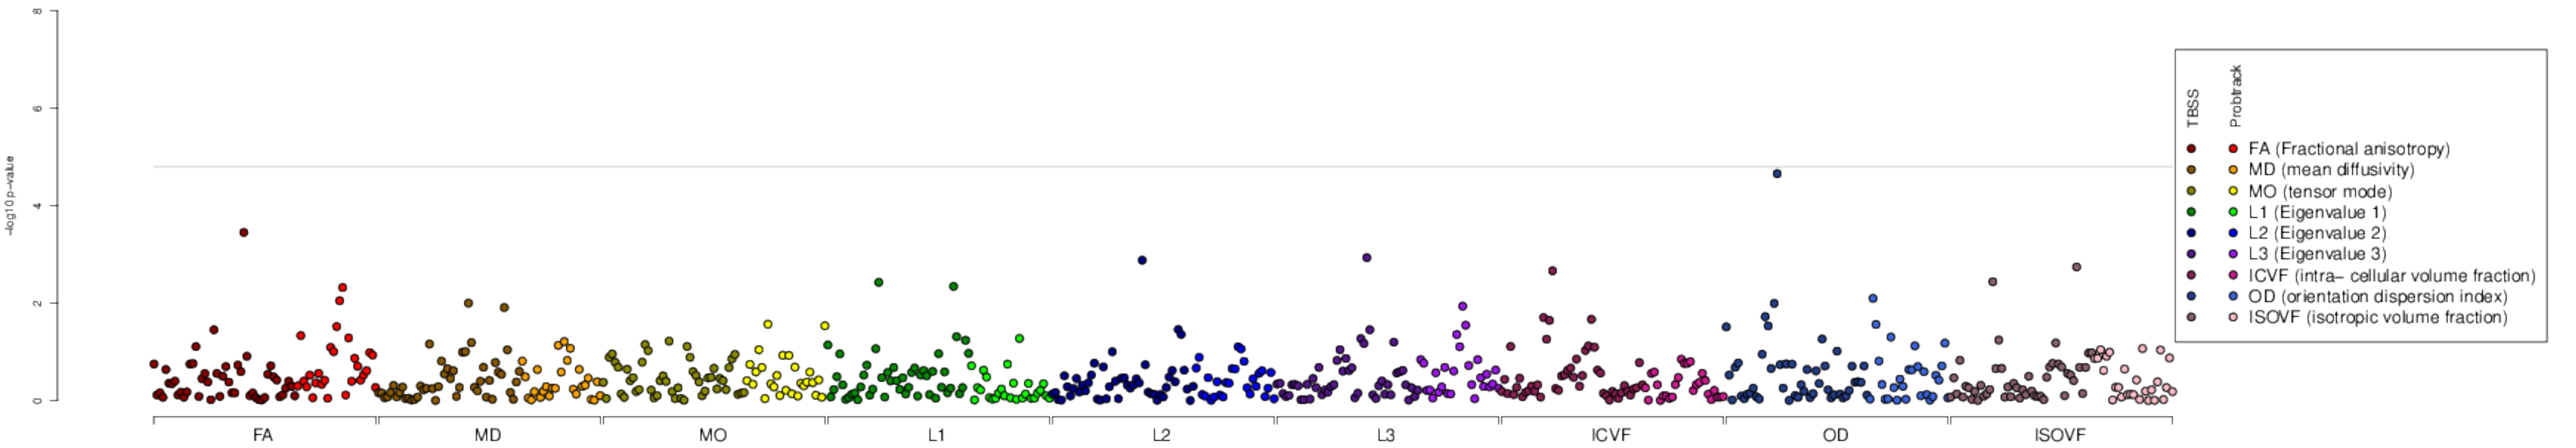

### functional MRI

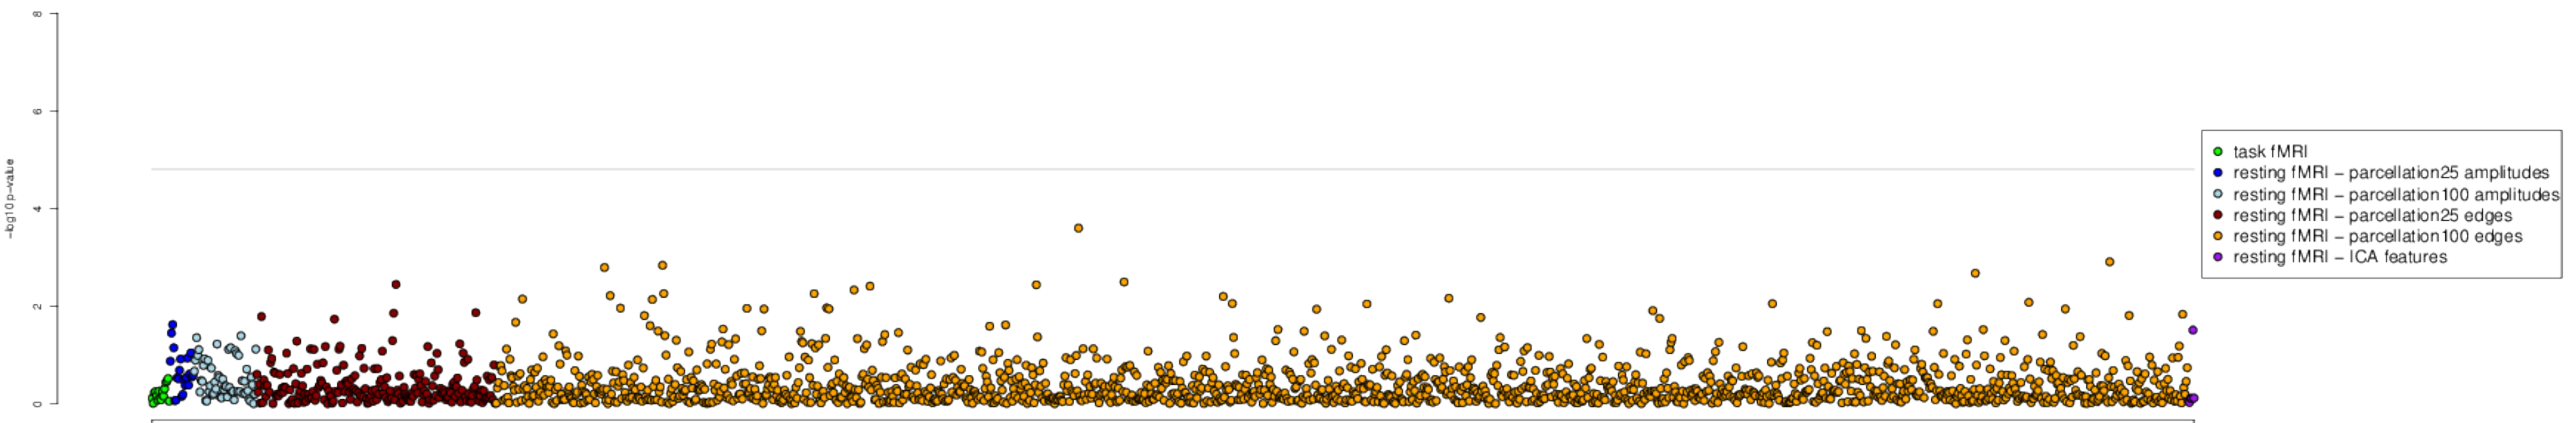

### Structural MRI

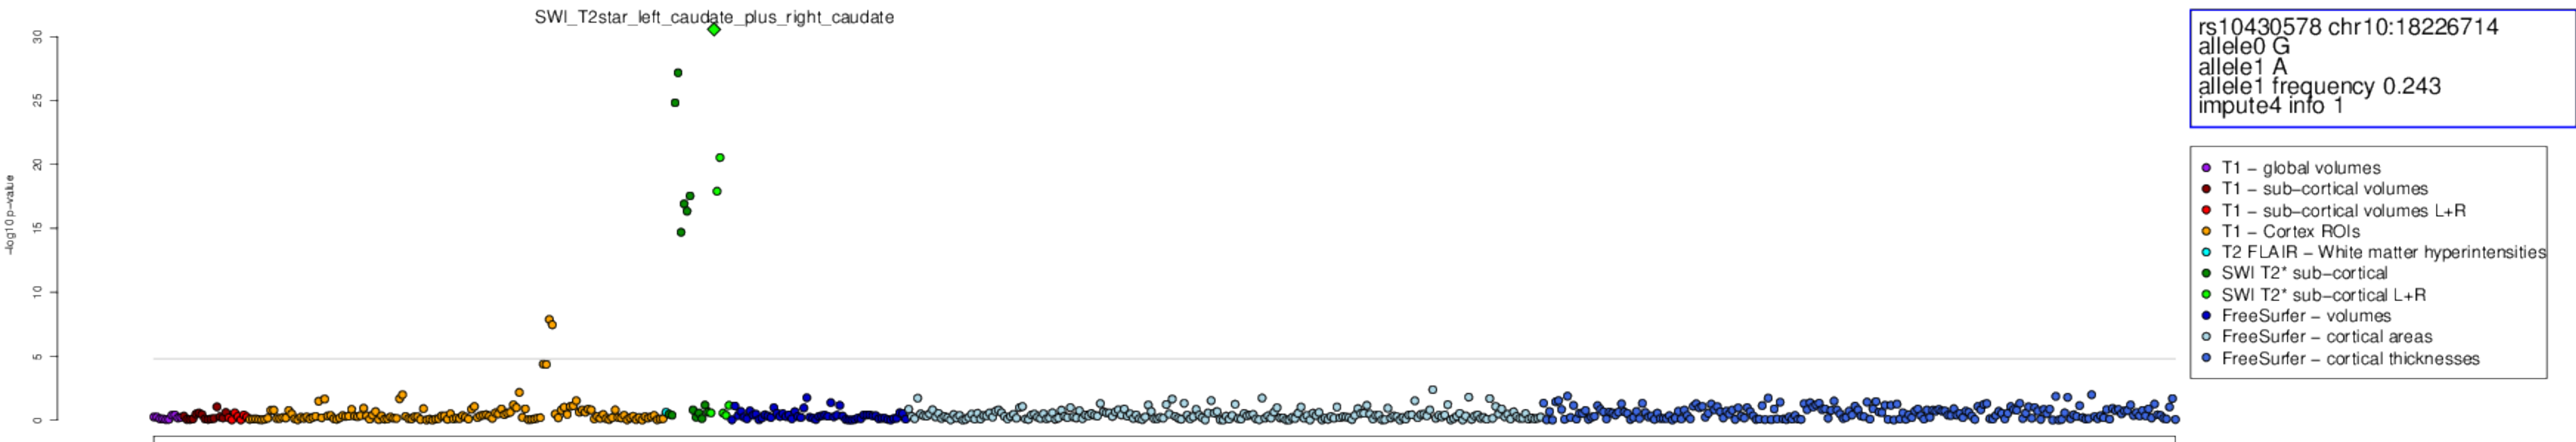

### Structural connectivity (Diffusion MRI)

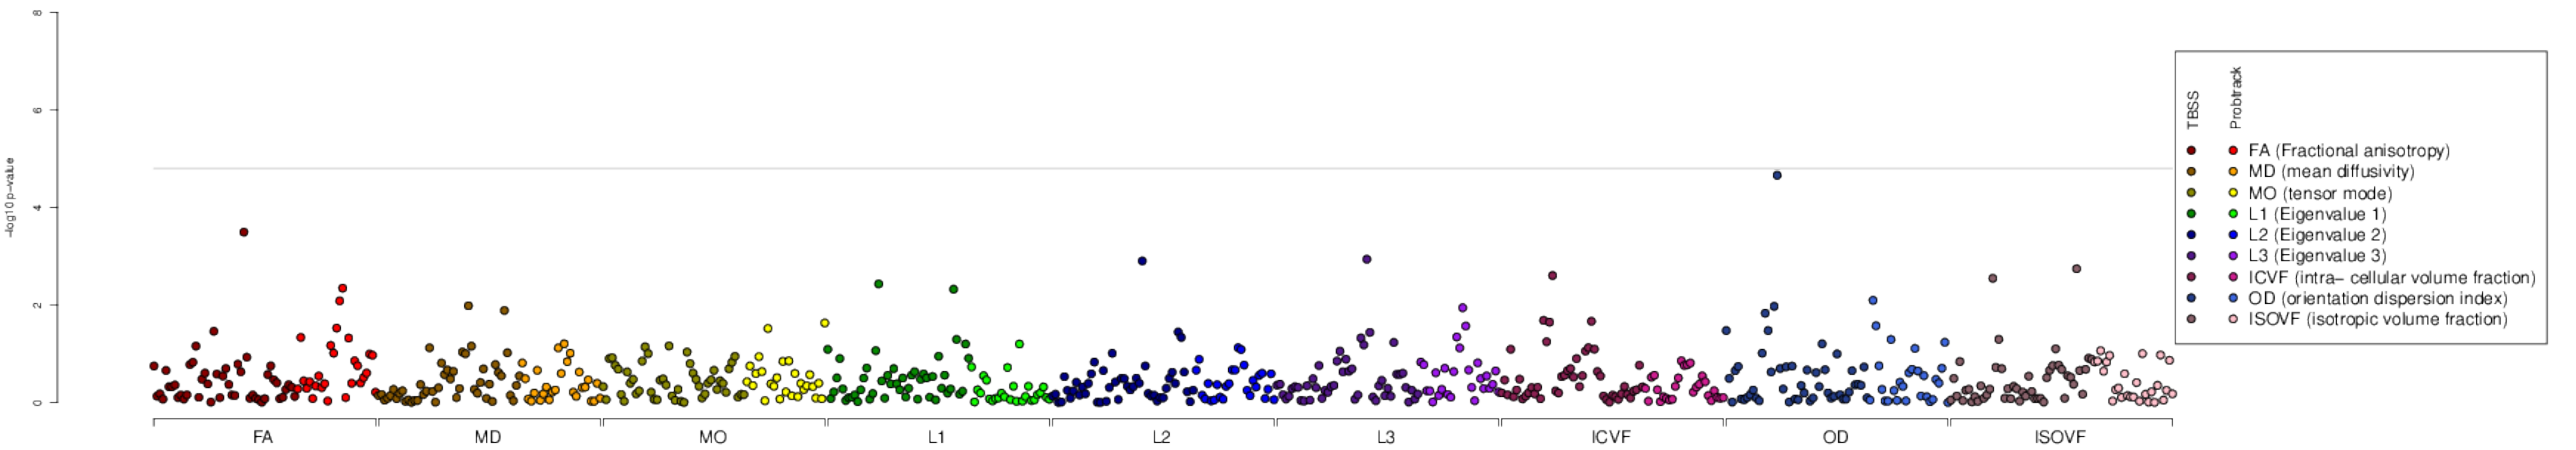

### functional MRI

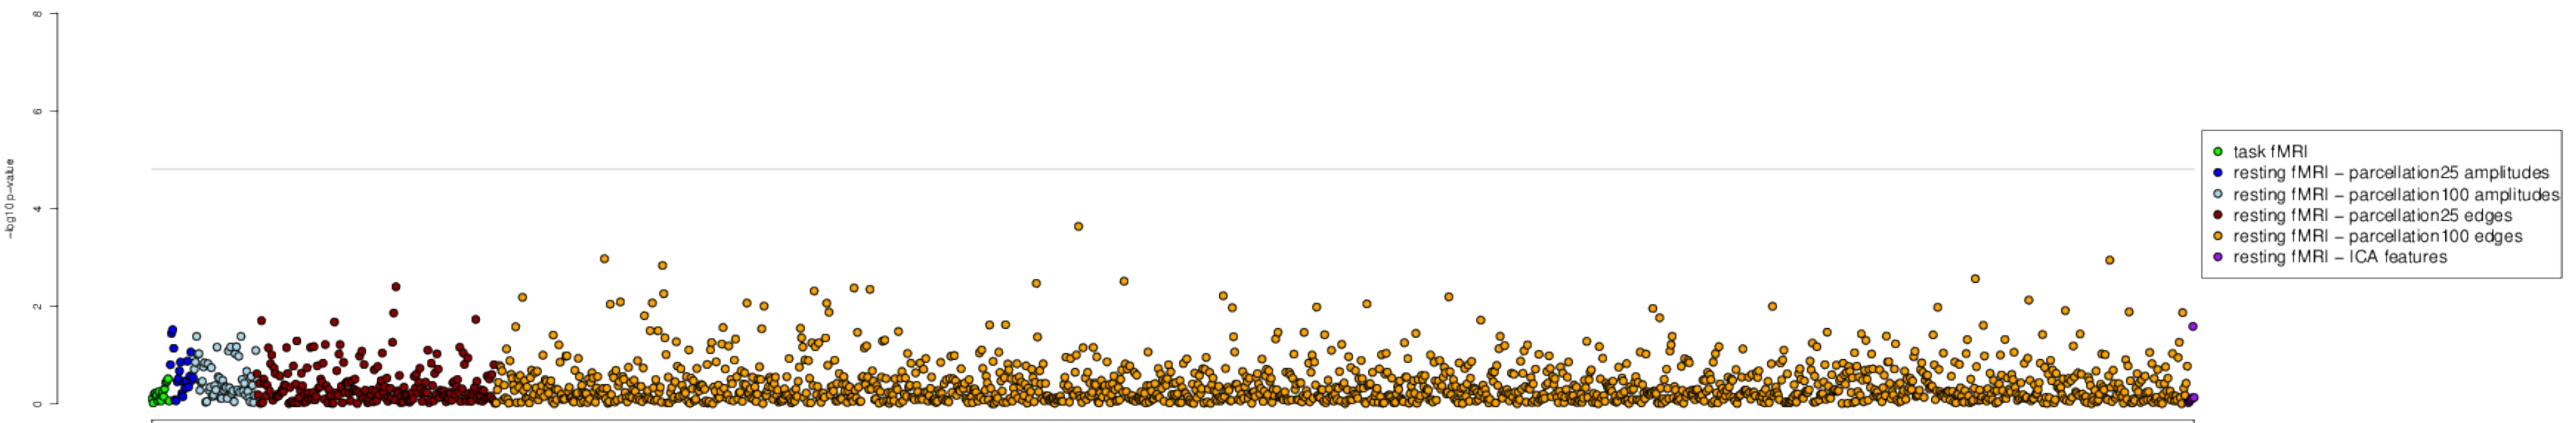

### Structural MRI

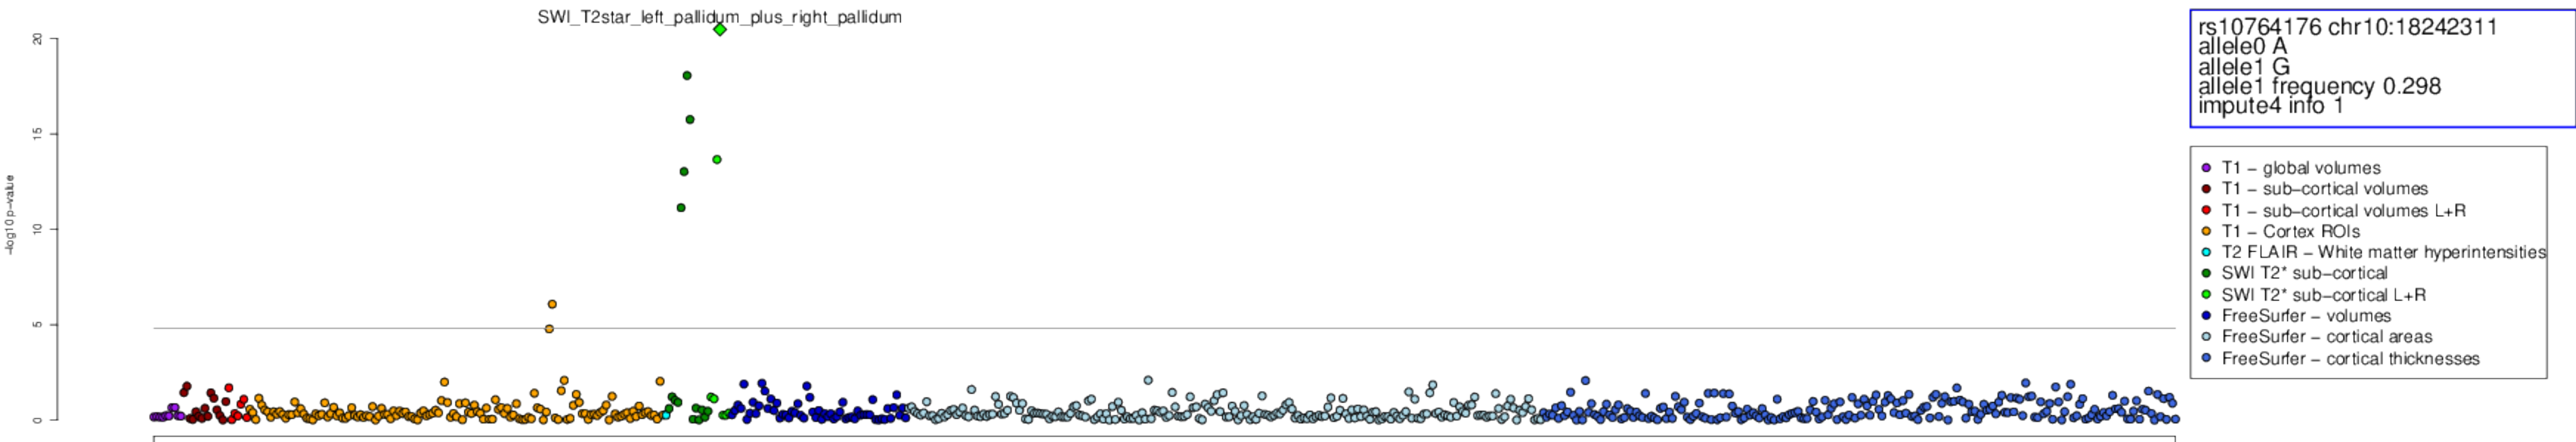

### Structural connectivity (Diffusion MRI)

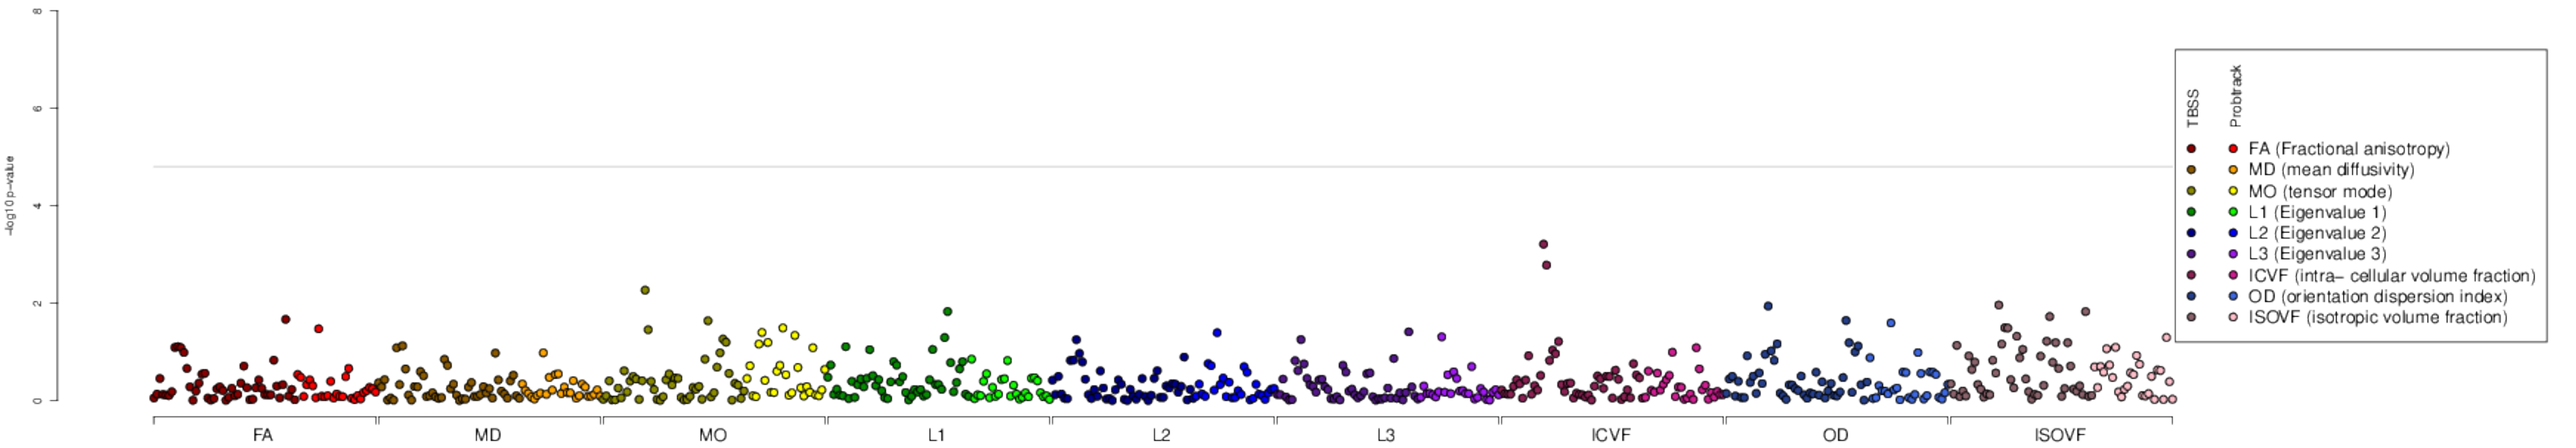

### functional MRI

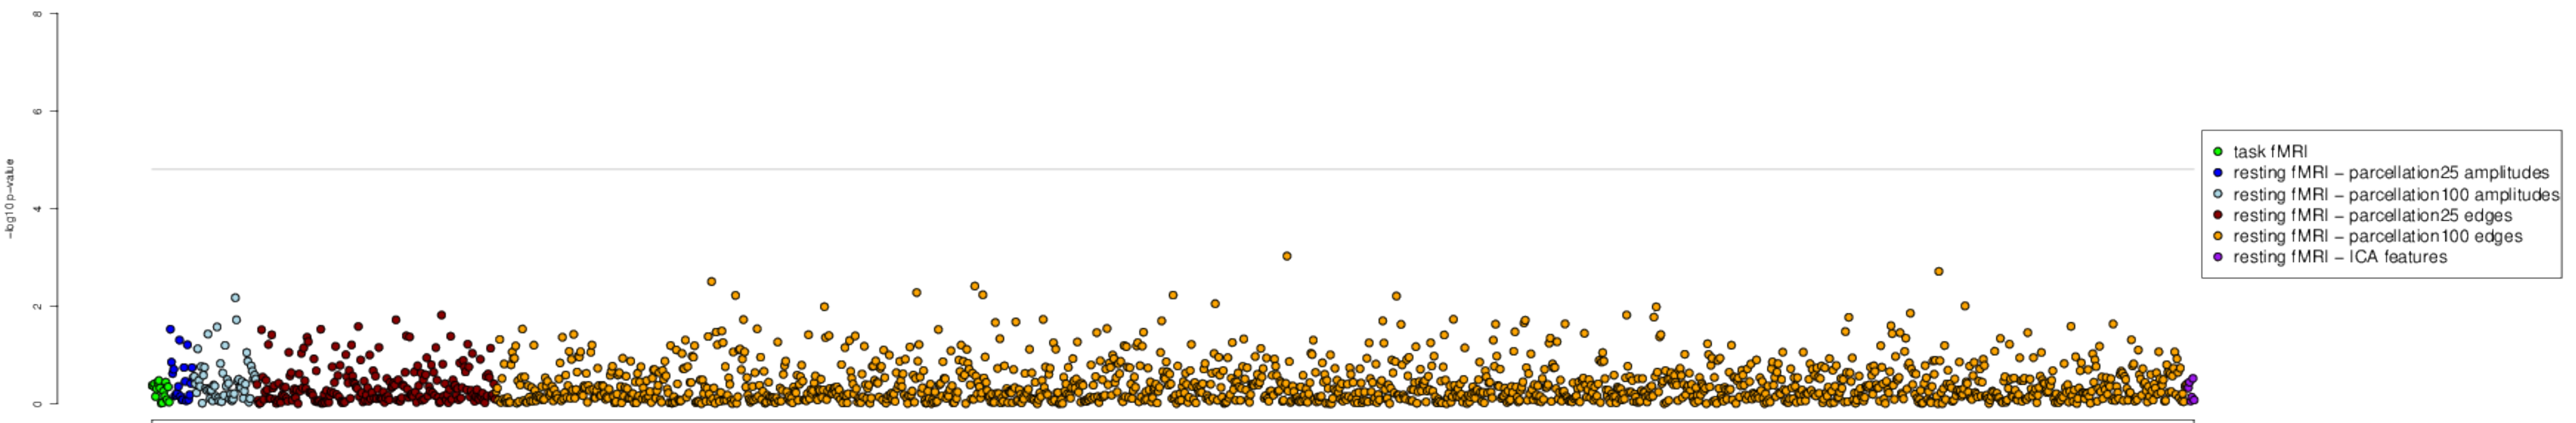

### Structural MRI

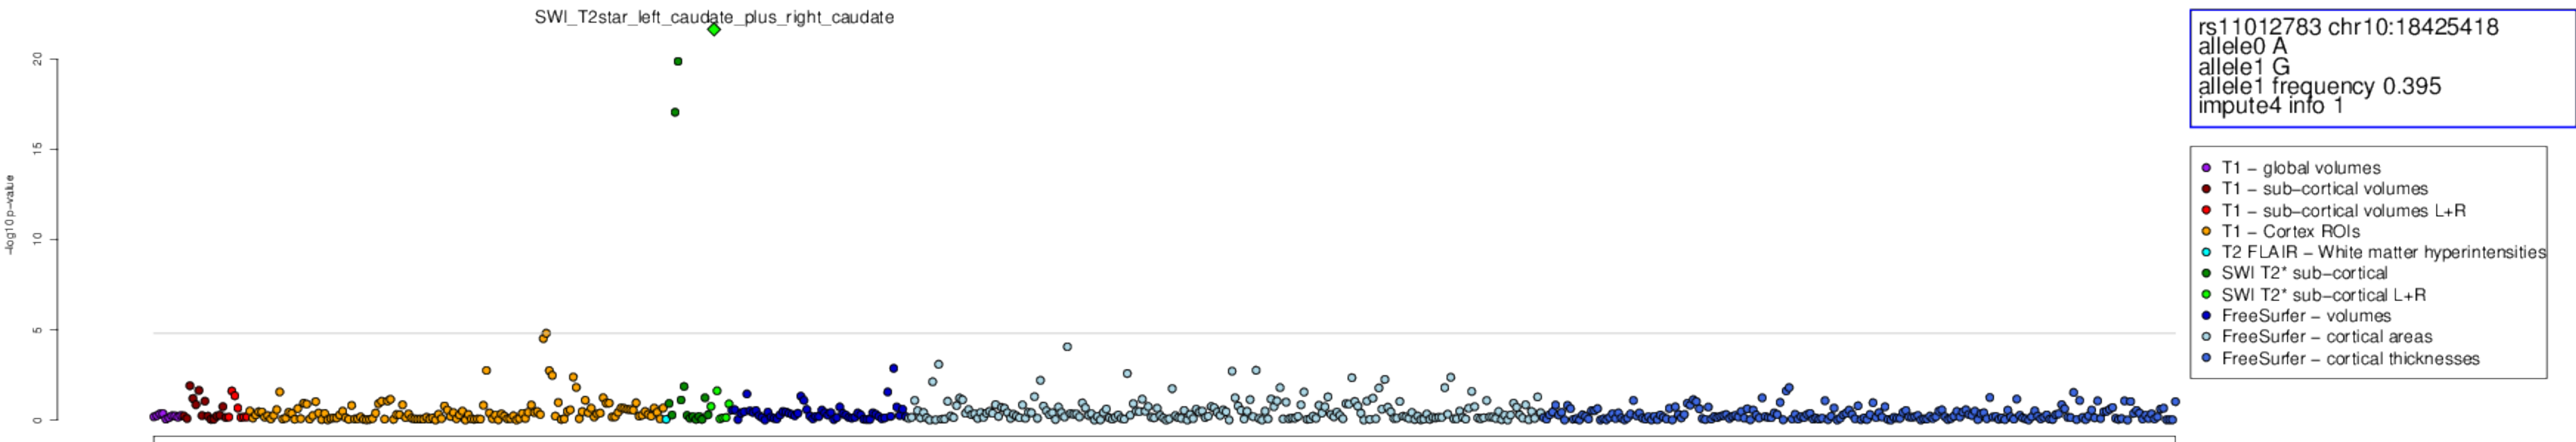

### Structural connectivity (Diffusion MRI)

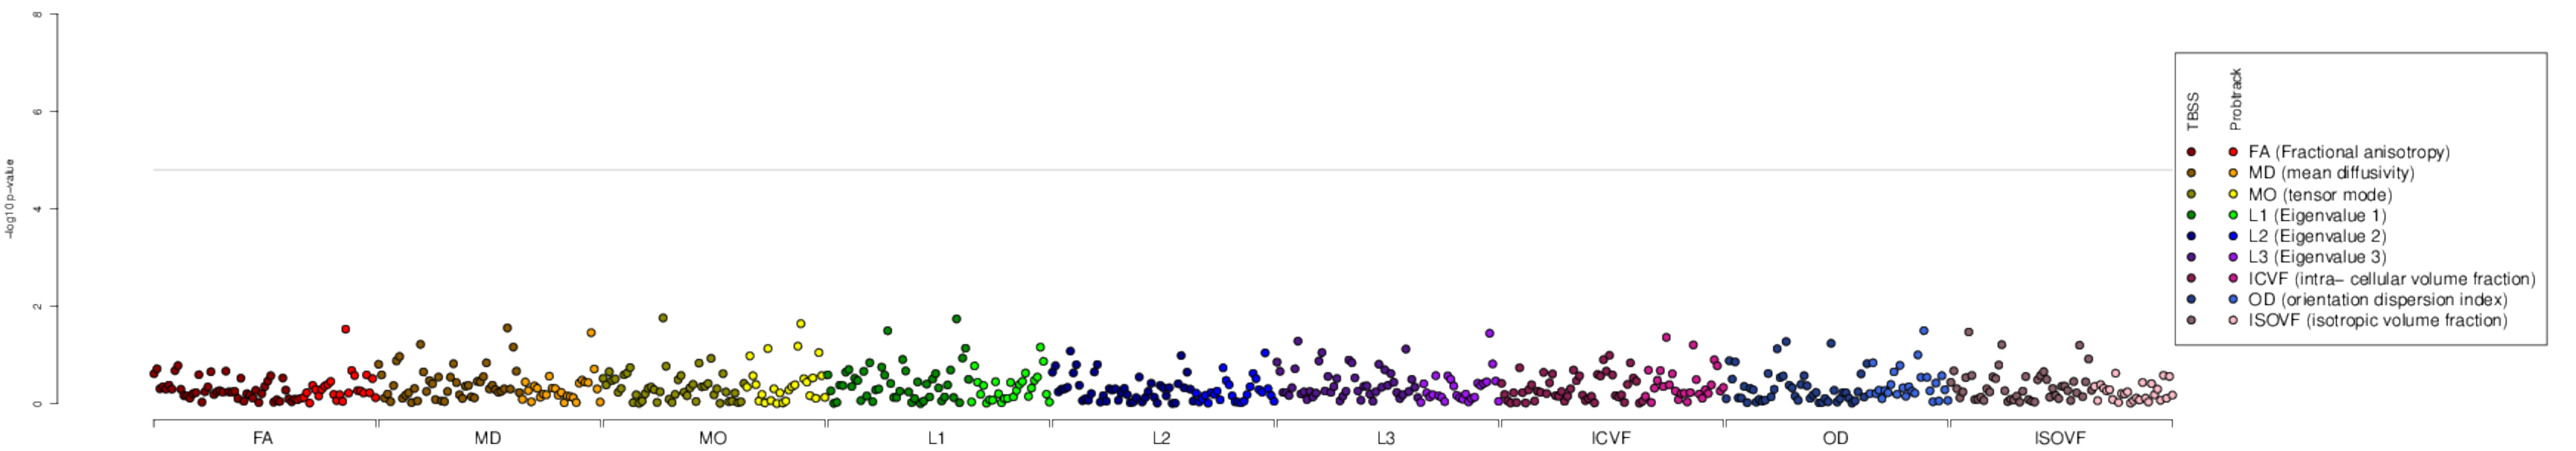

### functional MRI

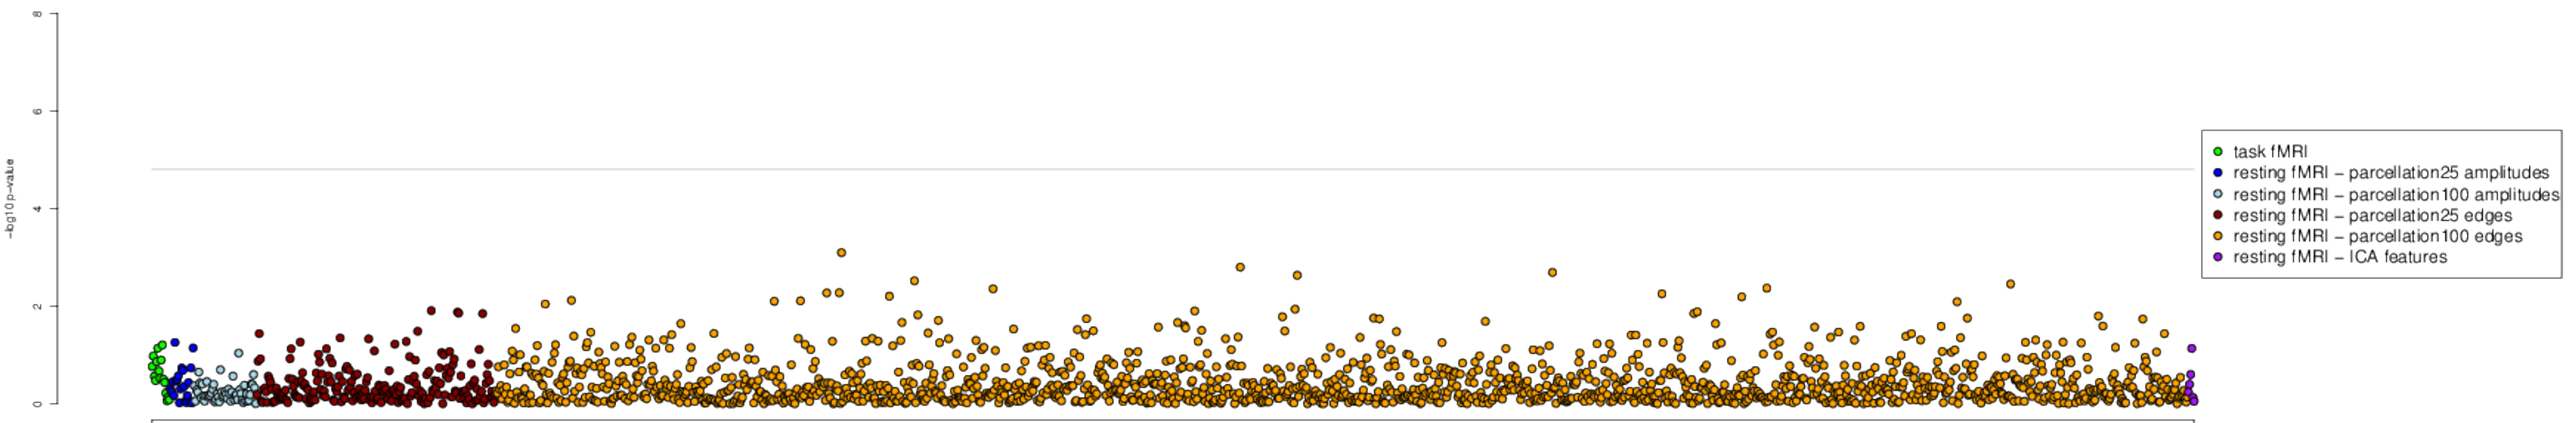

### Structural MRI

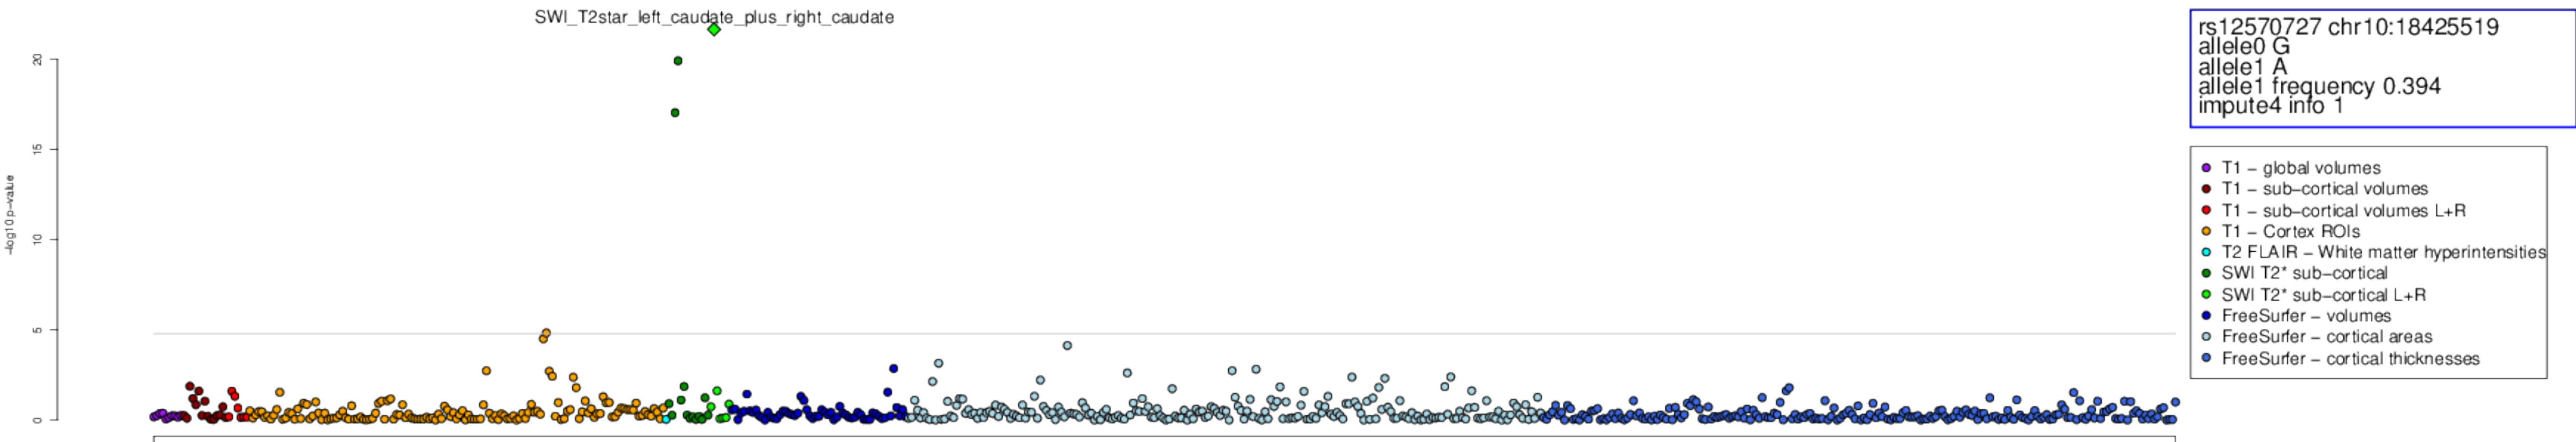

### Structural connectivity (Diffusion MRI)

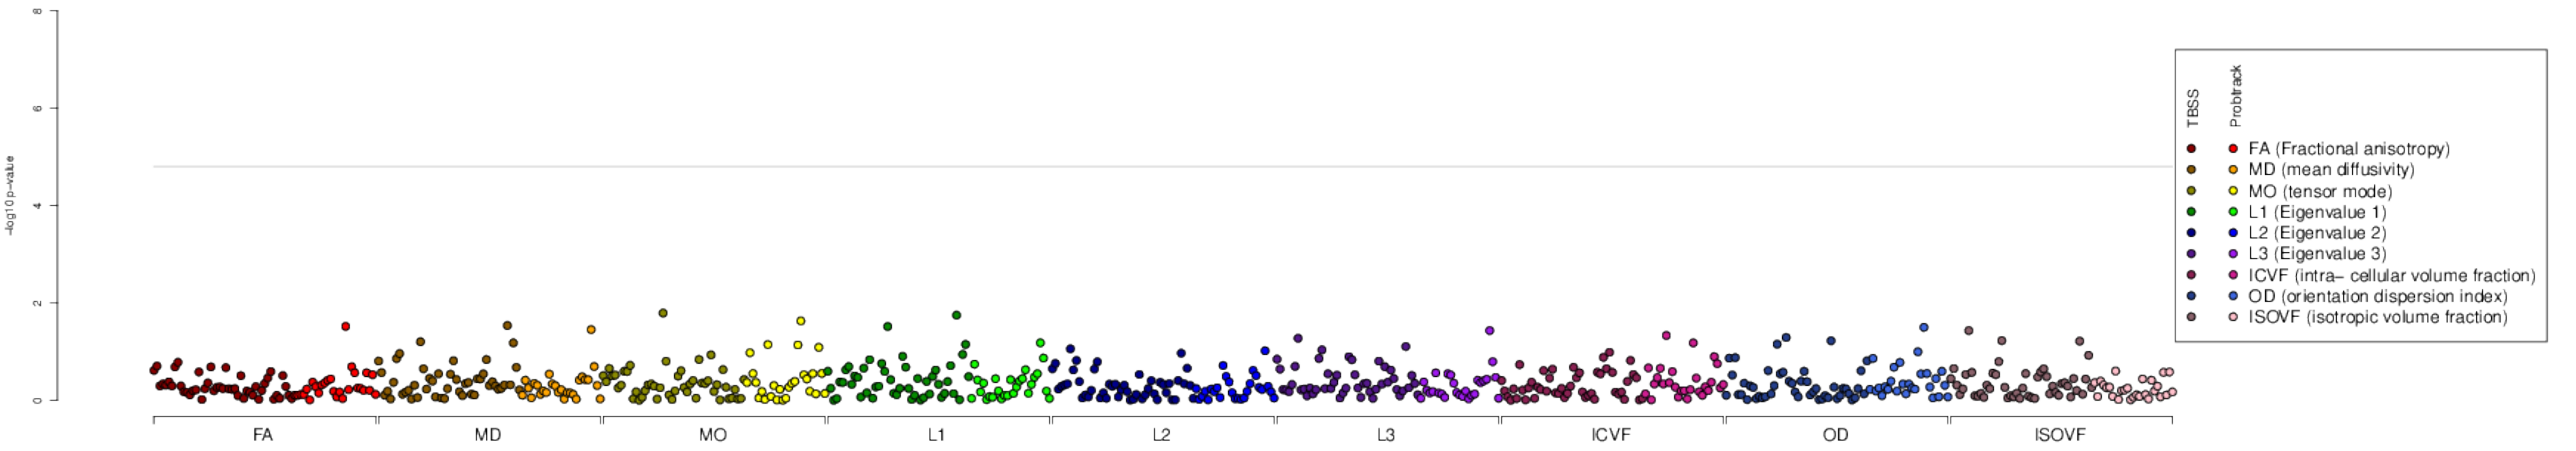

### functional MRI

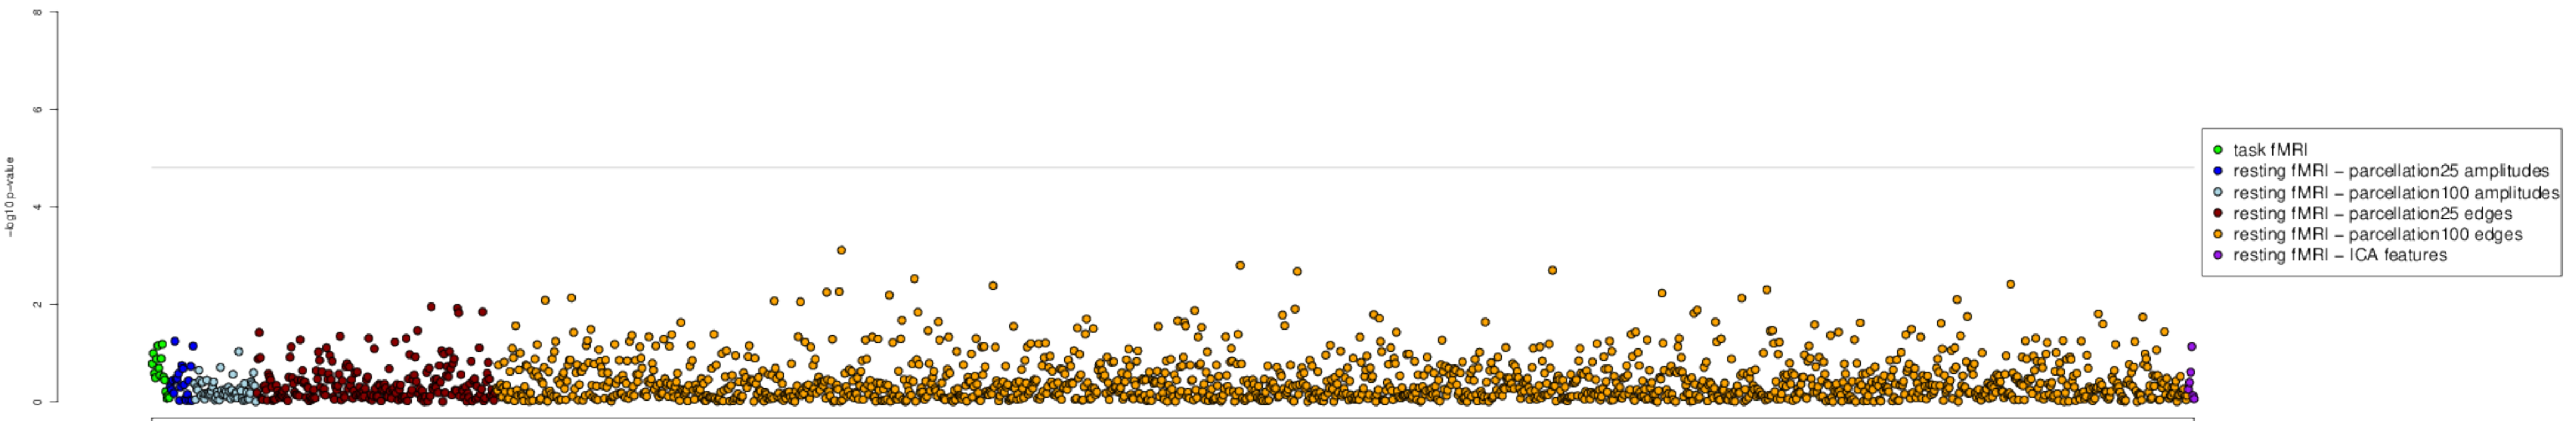

### Structural MRI

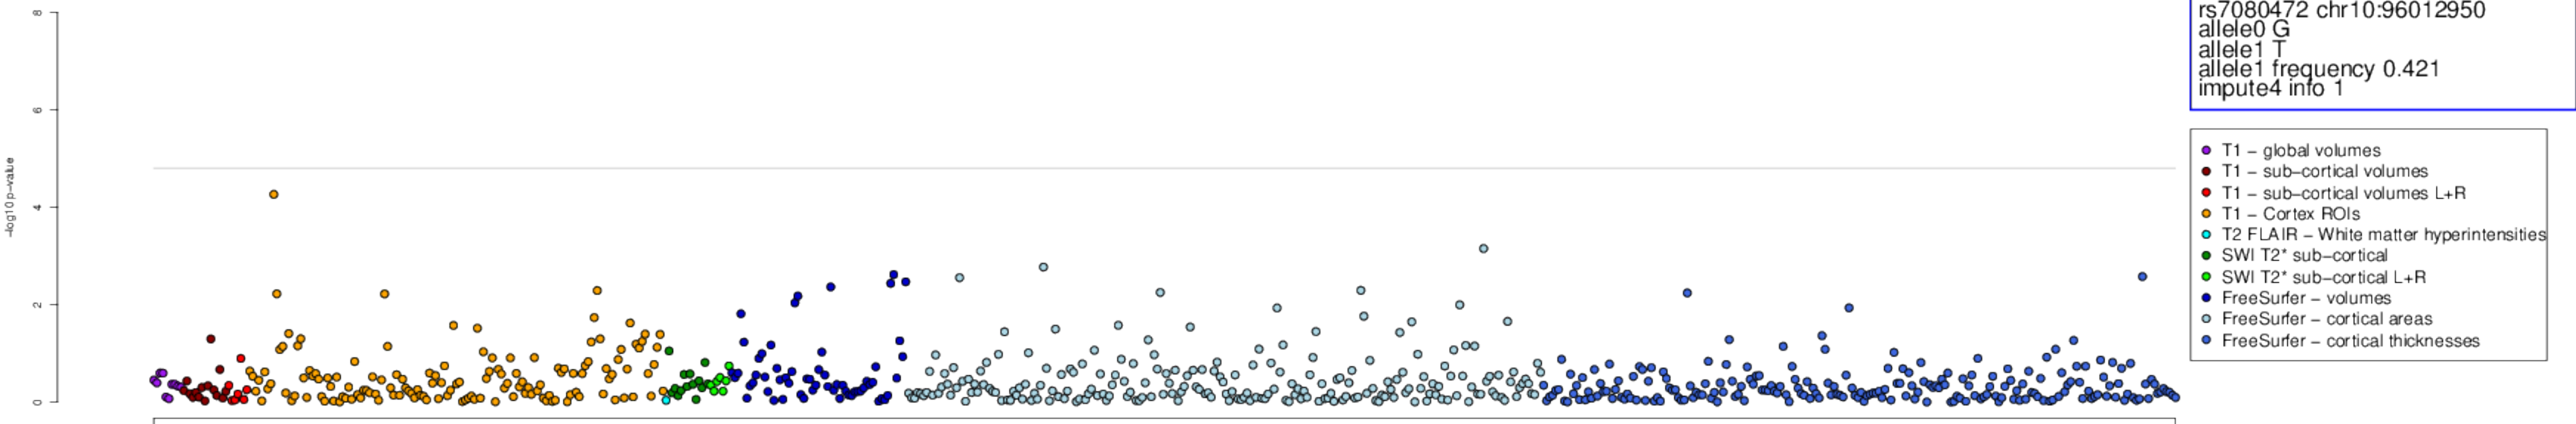

### Structural connectivity (Diffusion MRI)

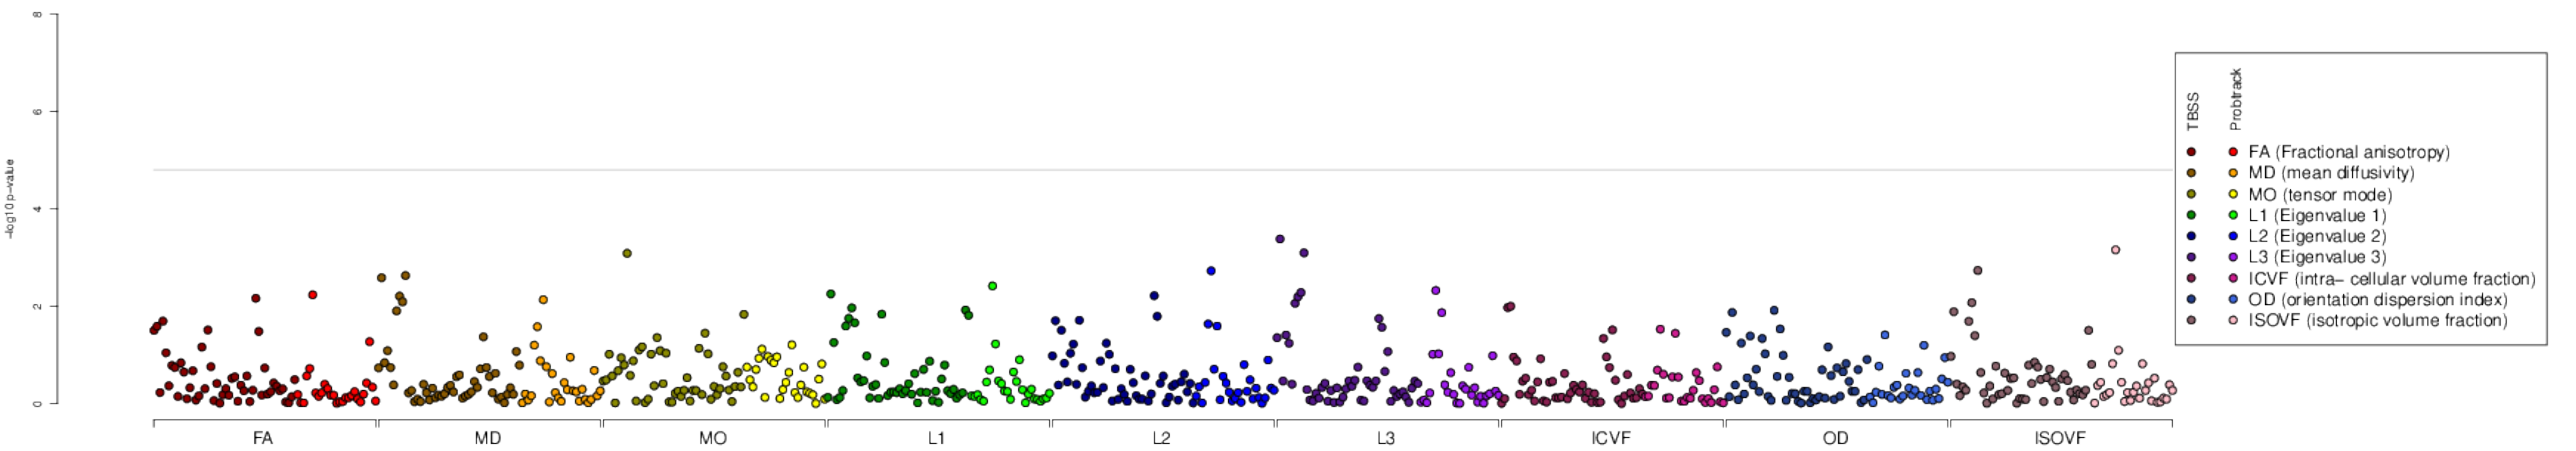

### functional MRI

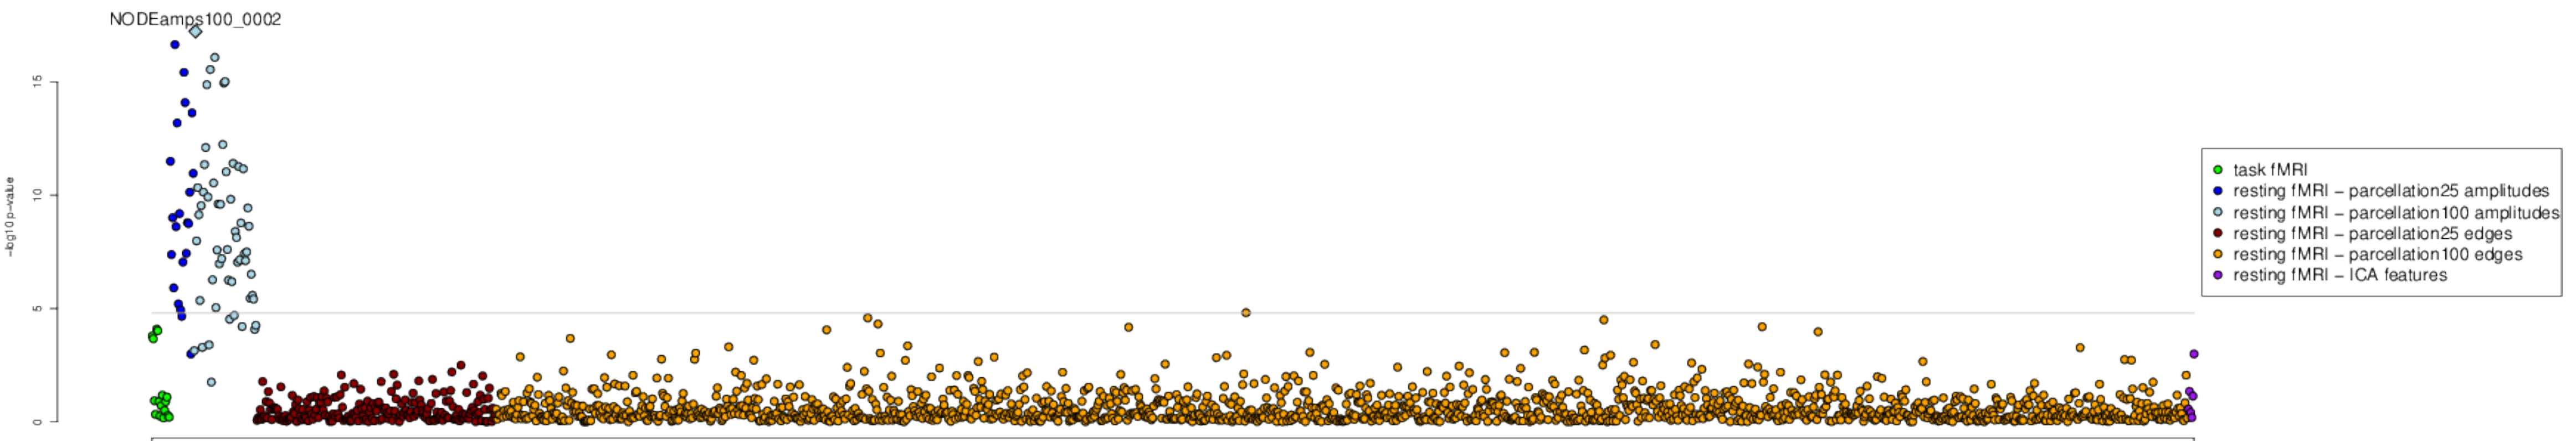

### Structural MRI

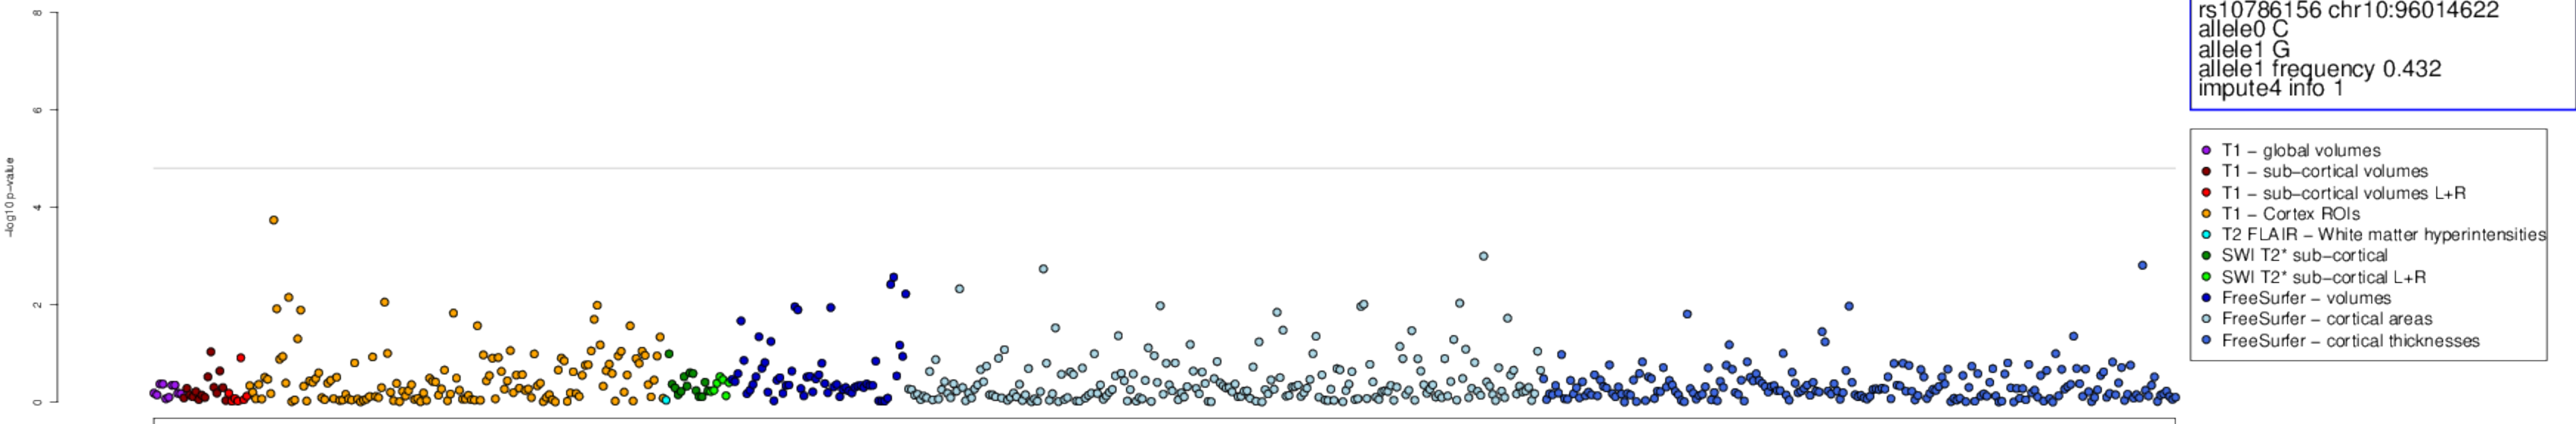

### Structural connectivity (Diffusion MRI)

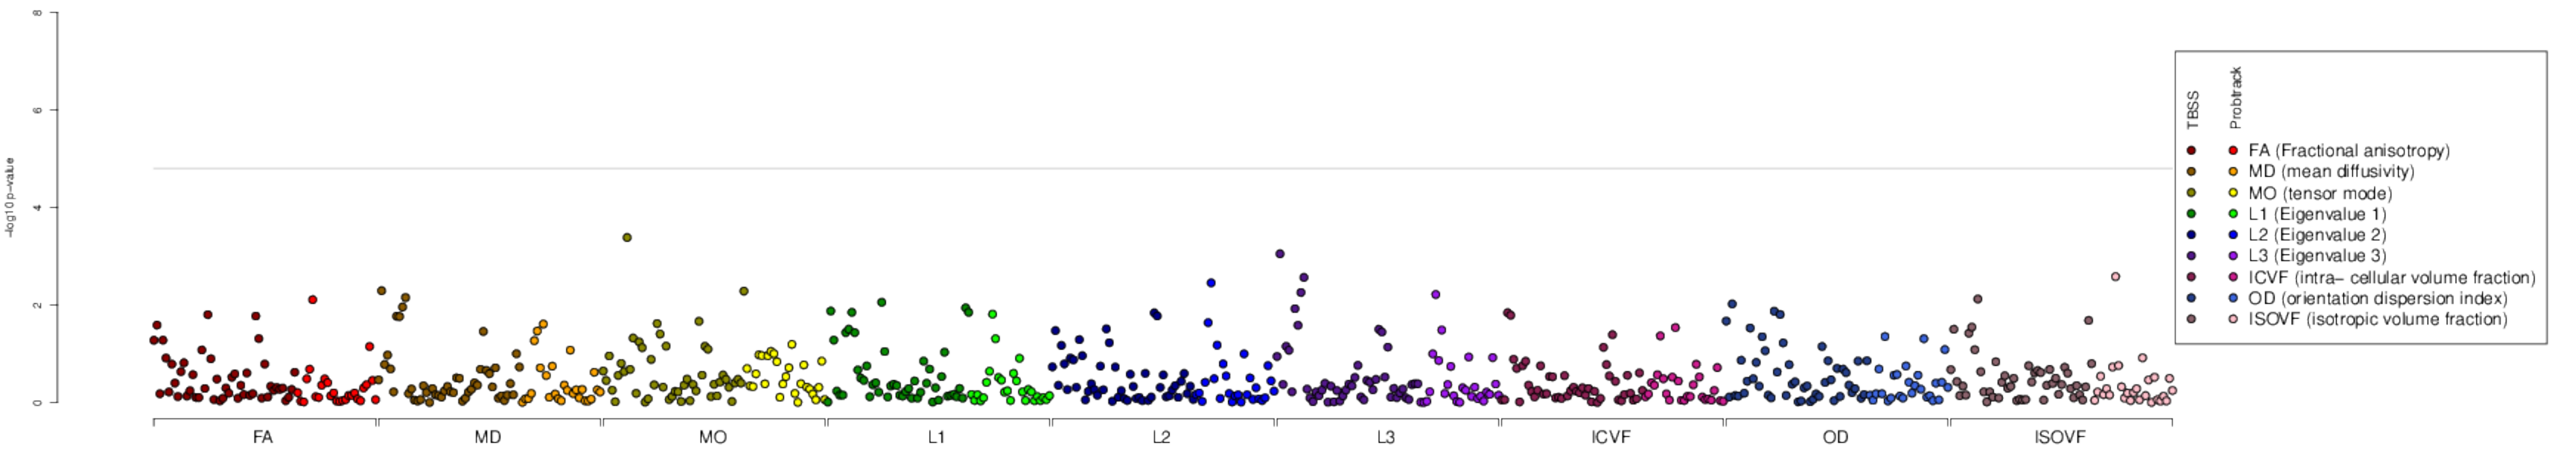

### functional MRI

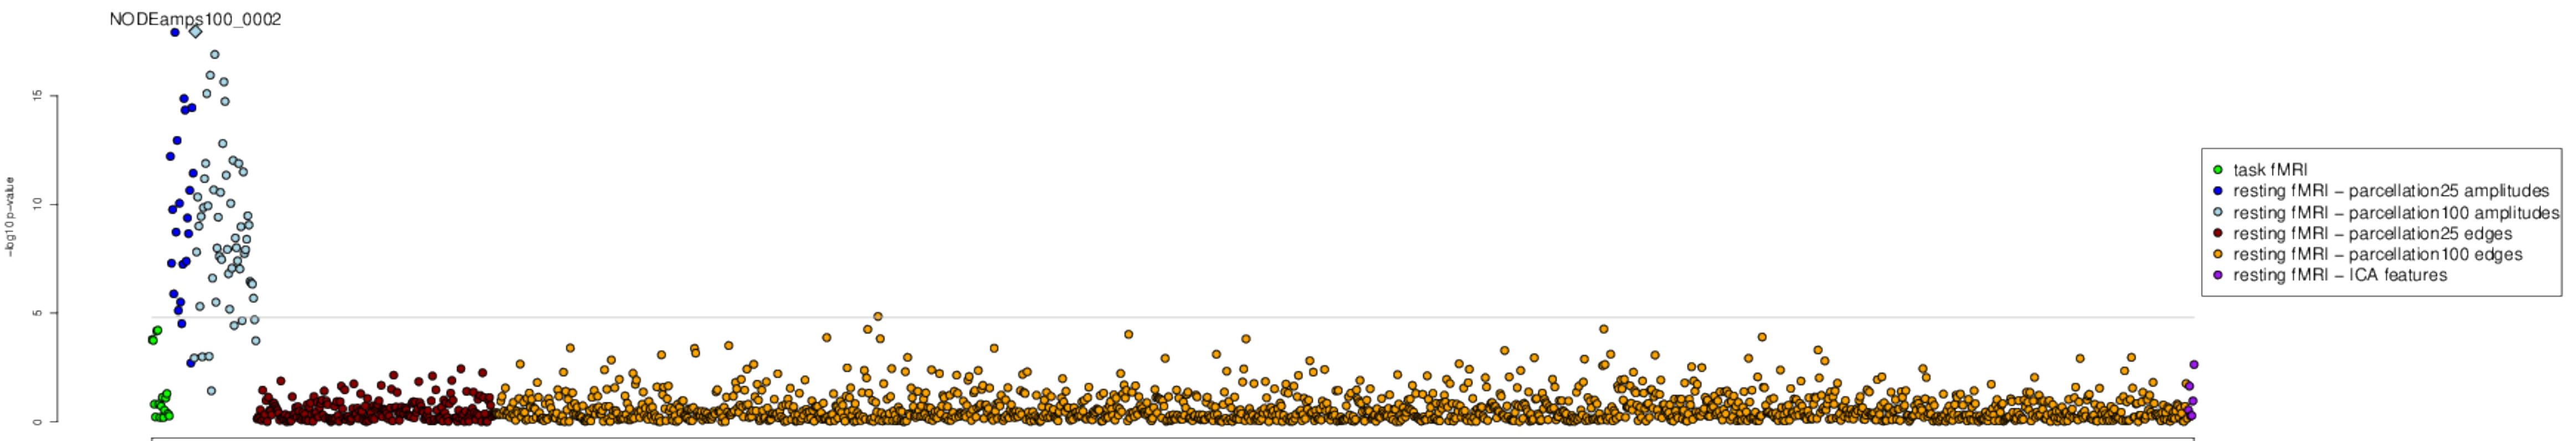



### Structural MRI

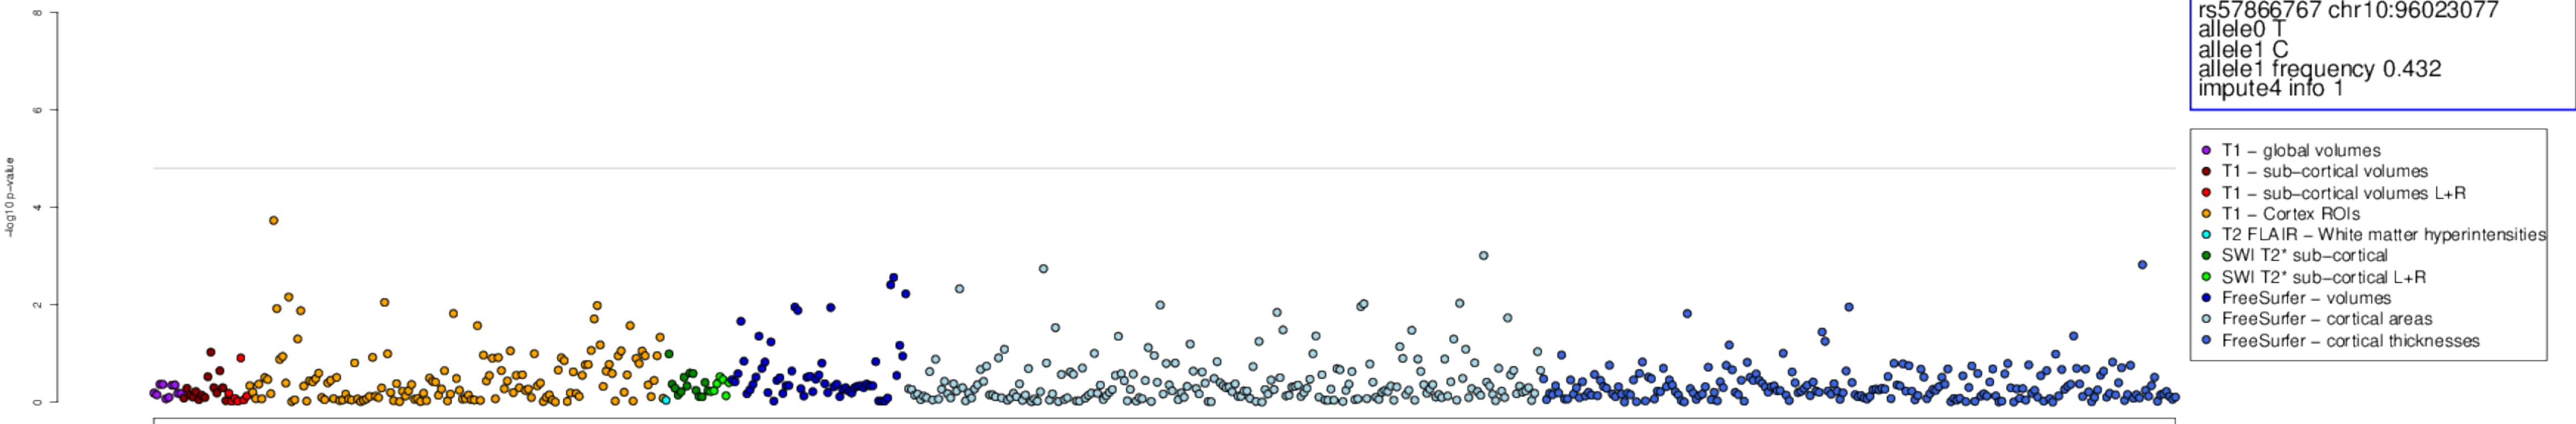

### Structural connectivity (Diffusion MRI)

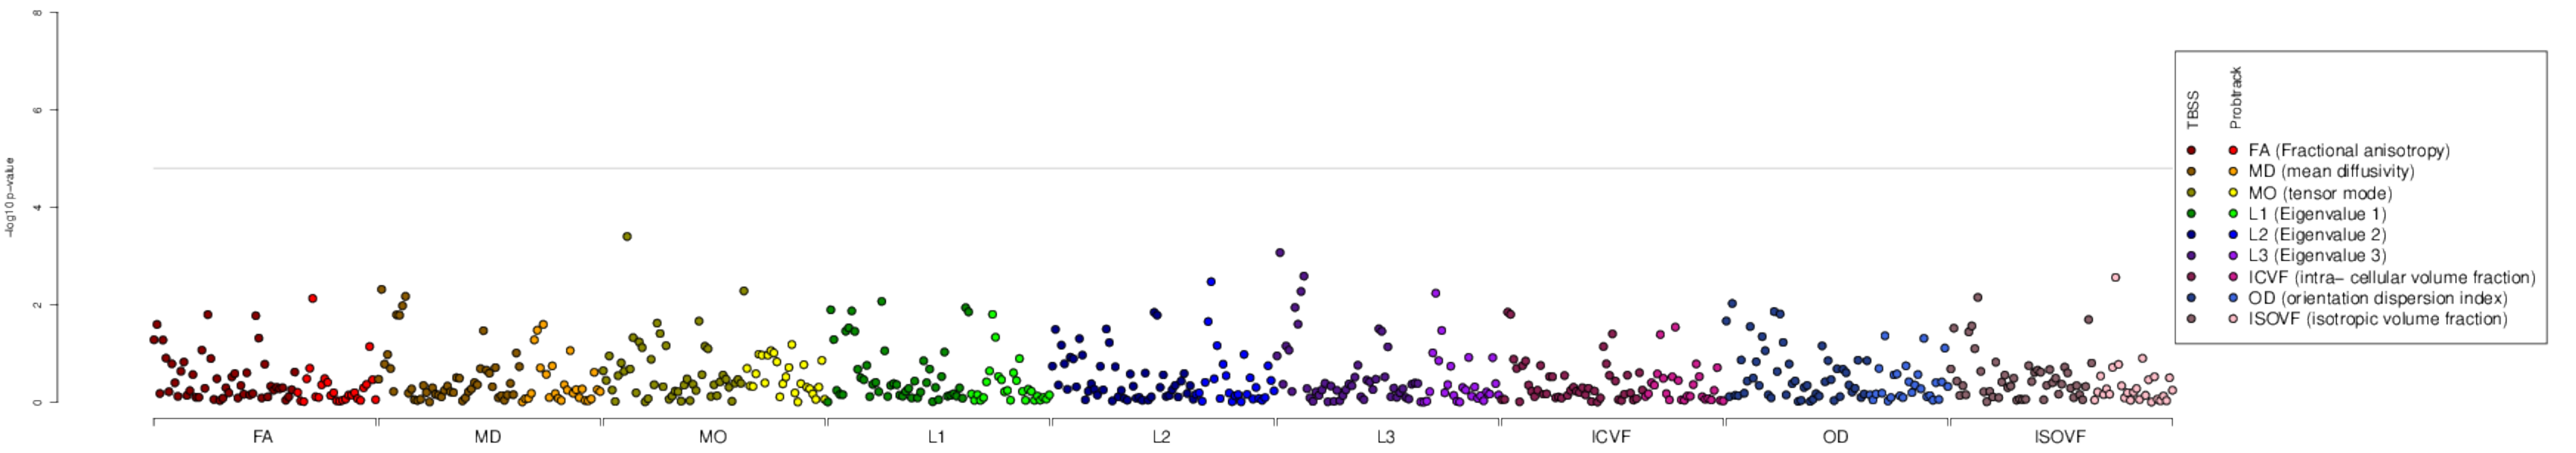

### functional MRI

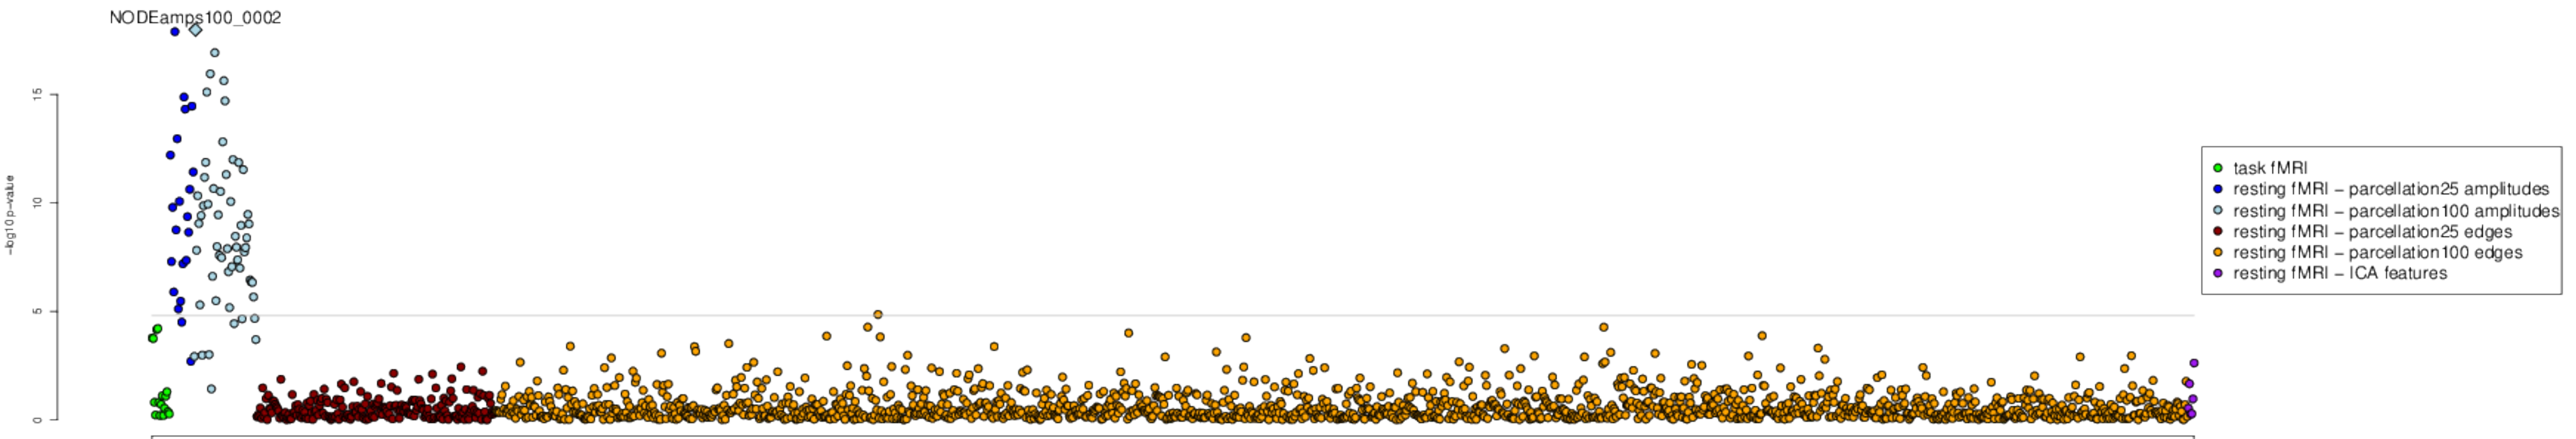

### Structural MRI

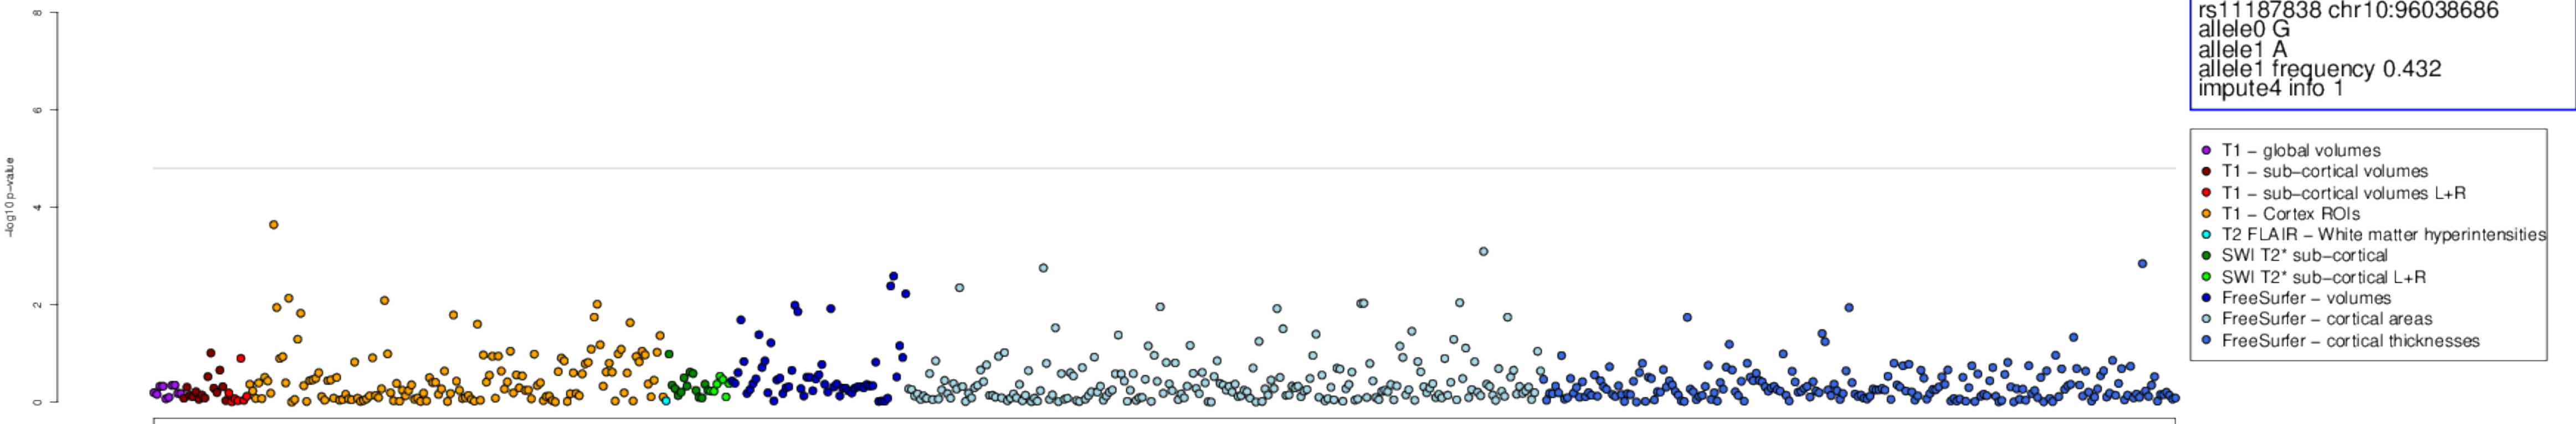

### Structural connectivity (Diffusion MRI)

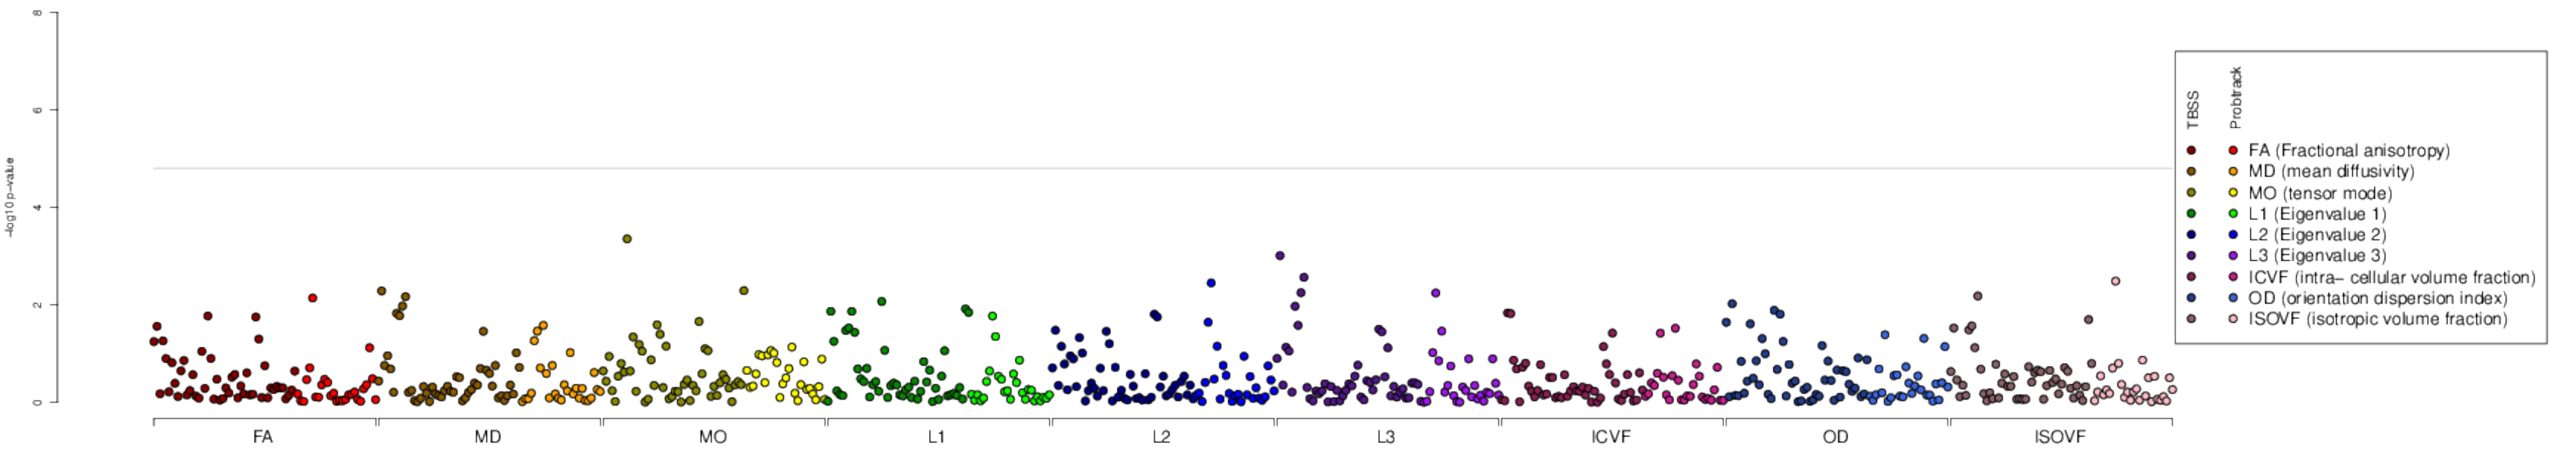

### functional MRI

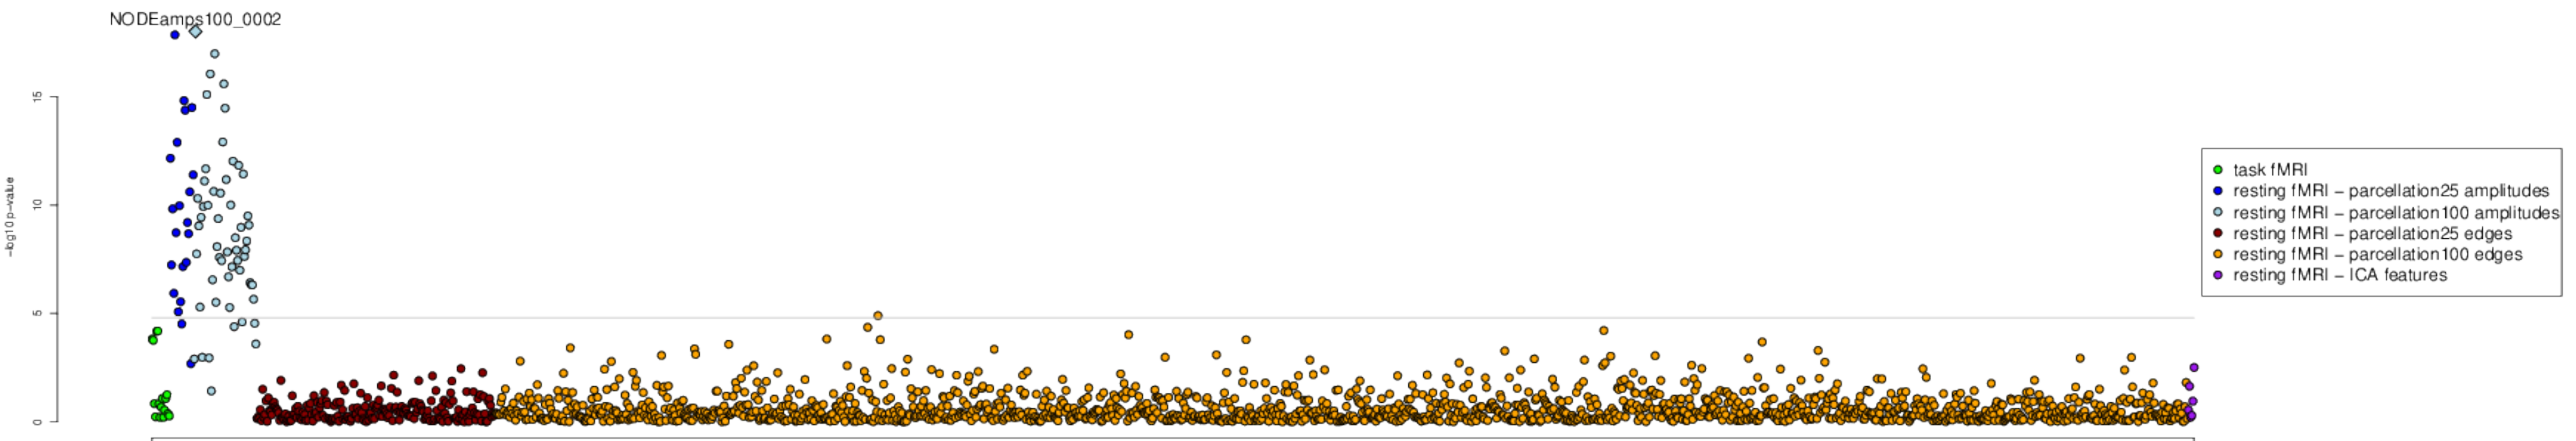

### Structural MRI

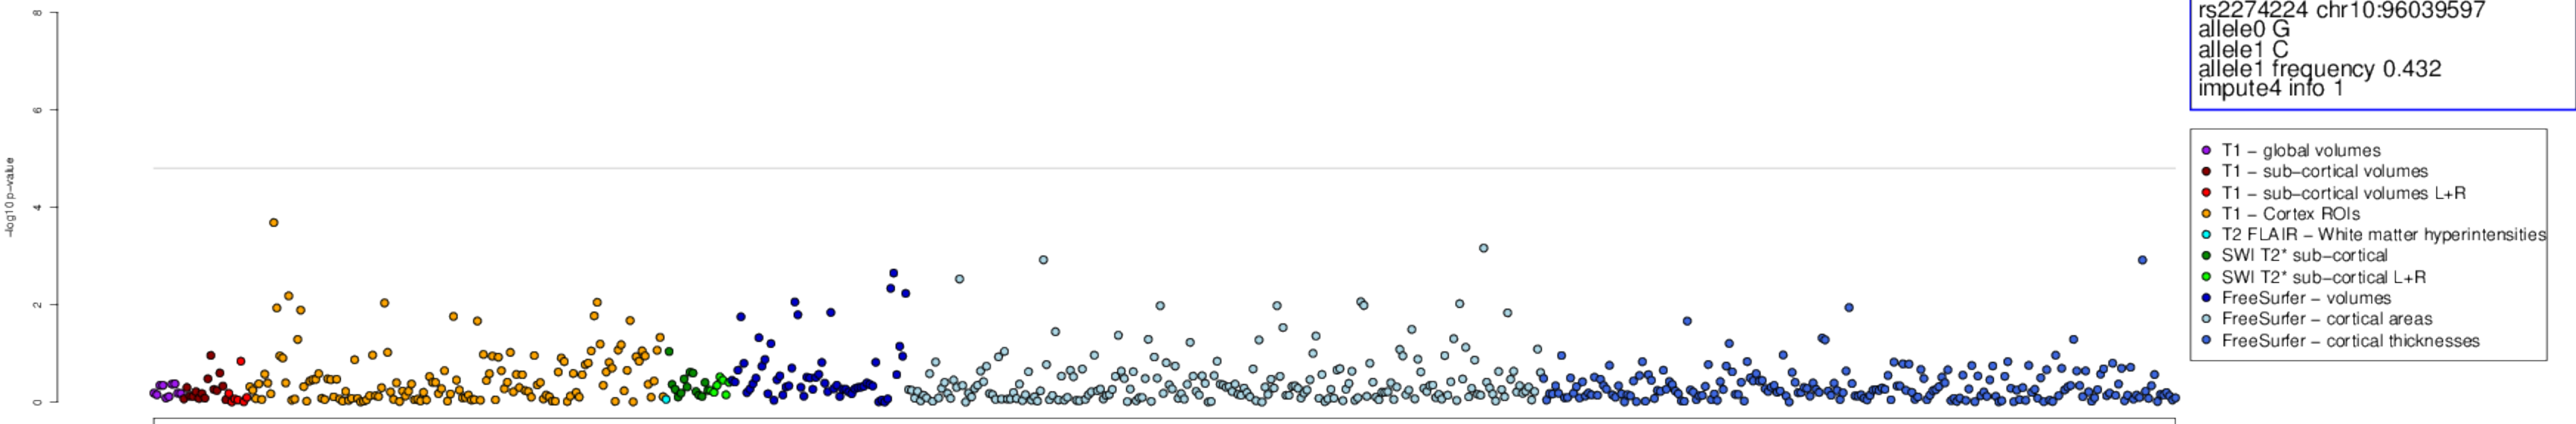

### Structural connectivity (Diffusion MRI)

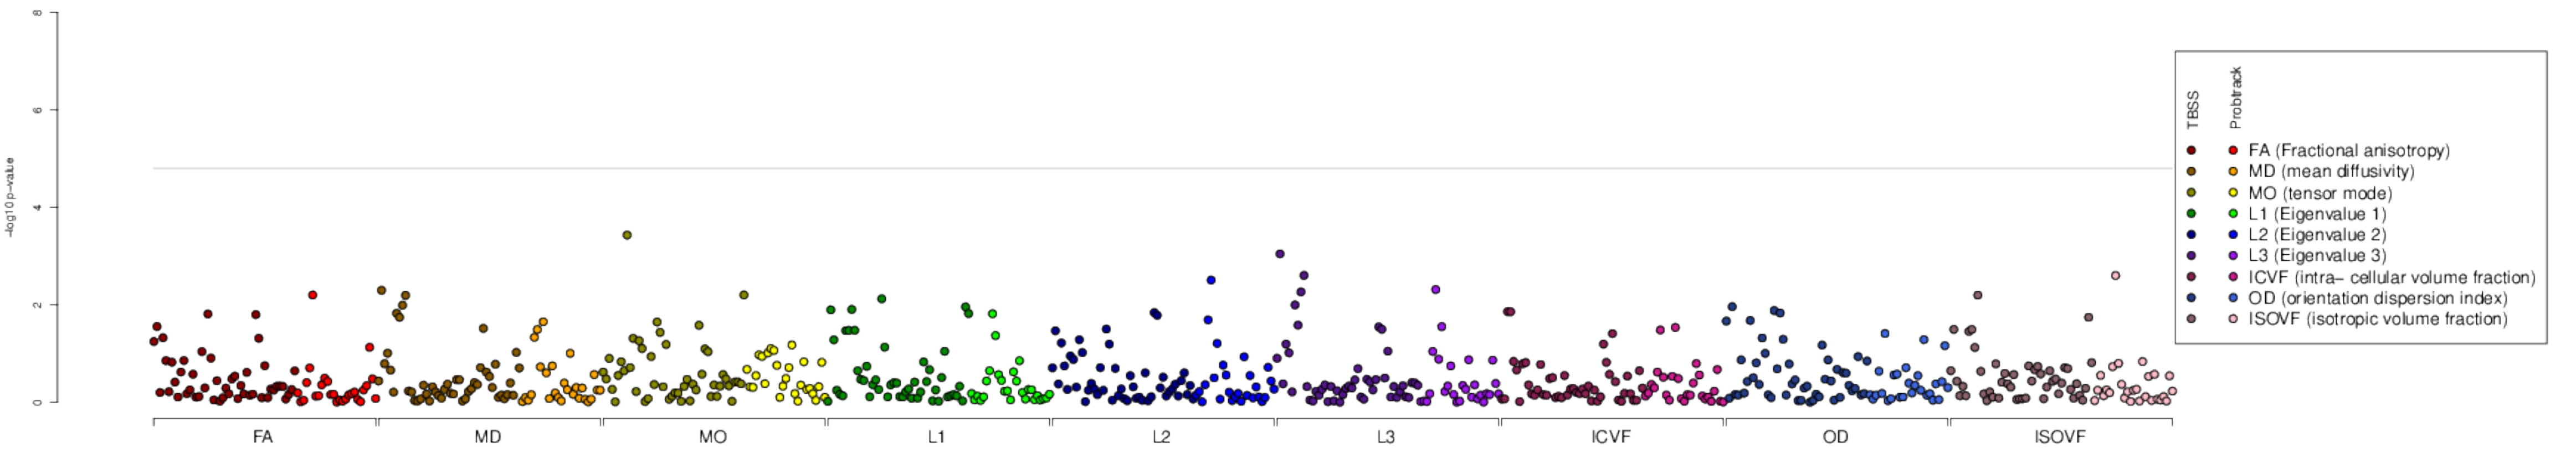

### functional MRI

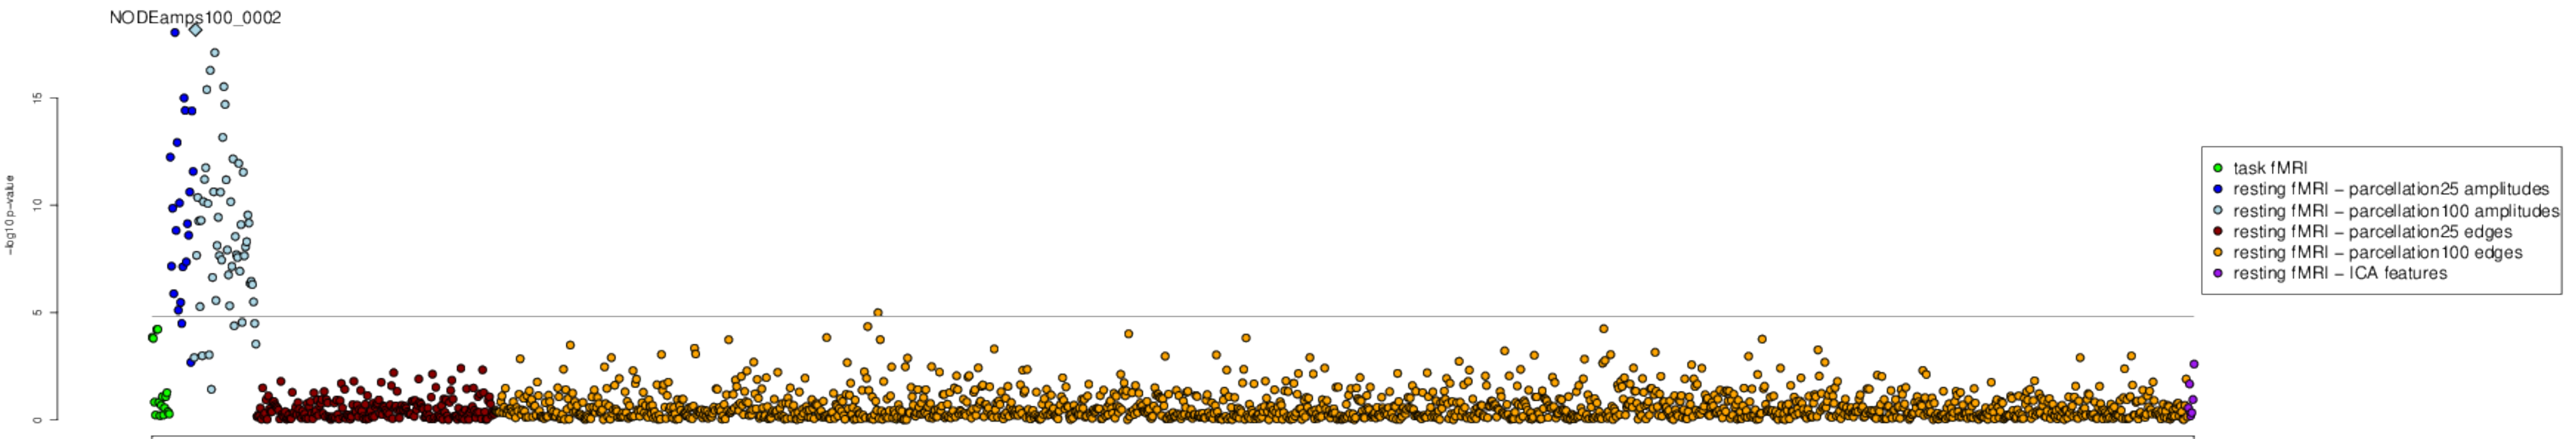

### Structural MRI

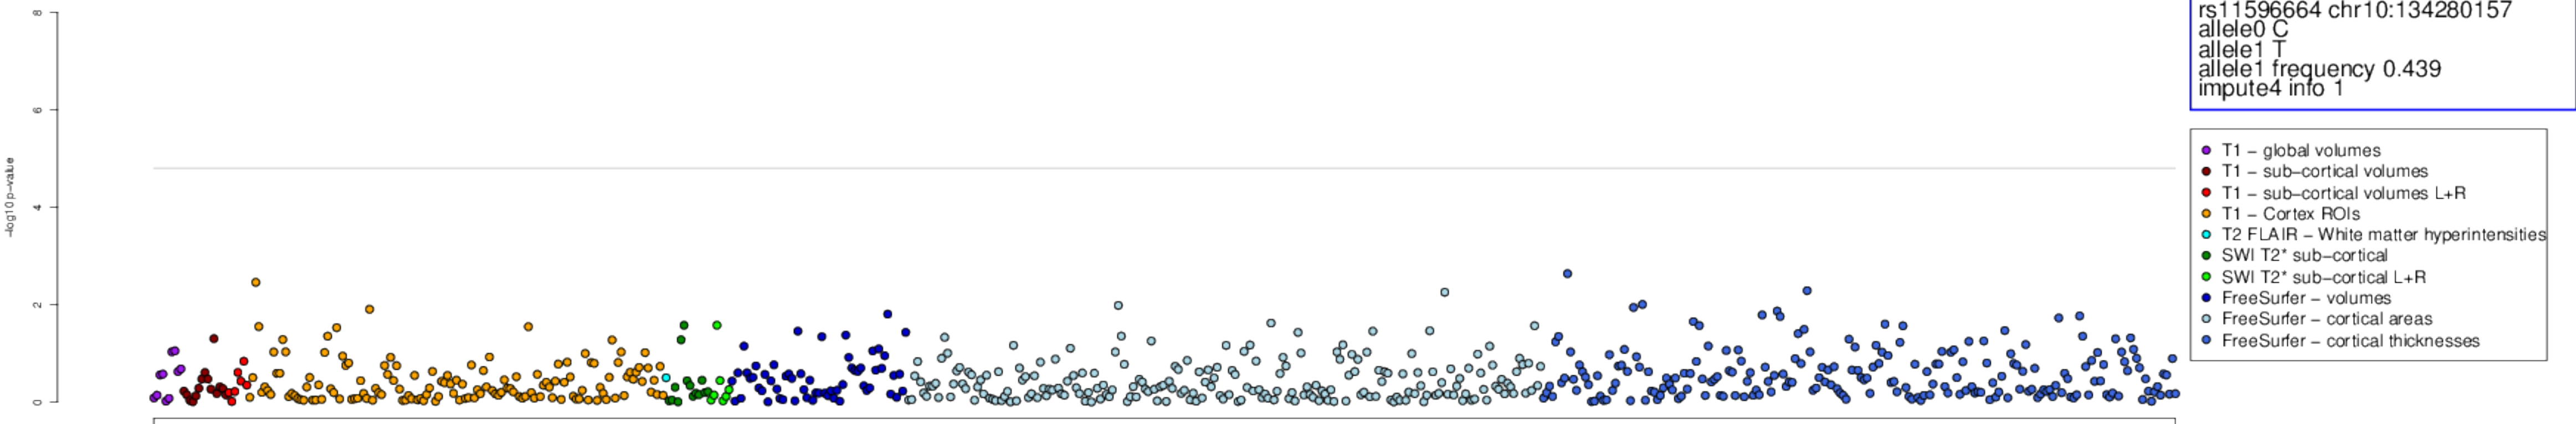

### Structural connectivity (Diffusion MRI)

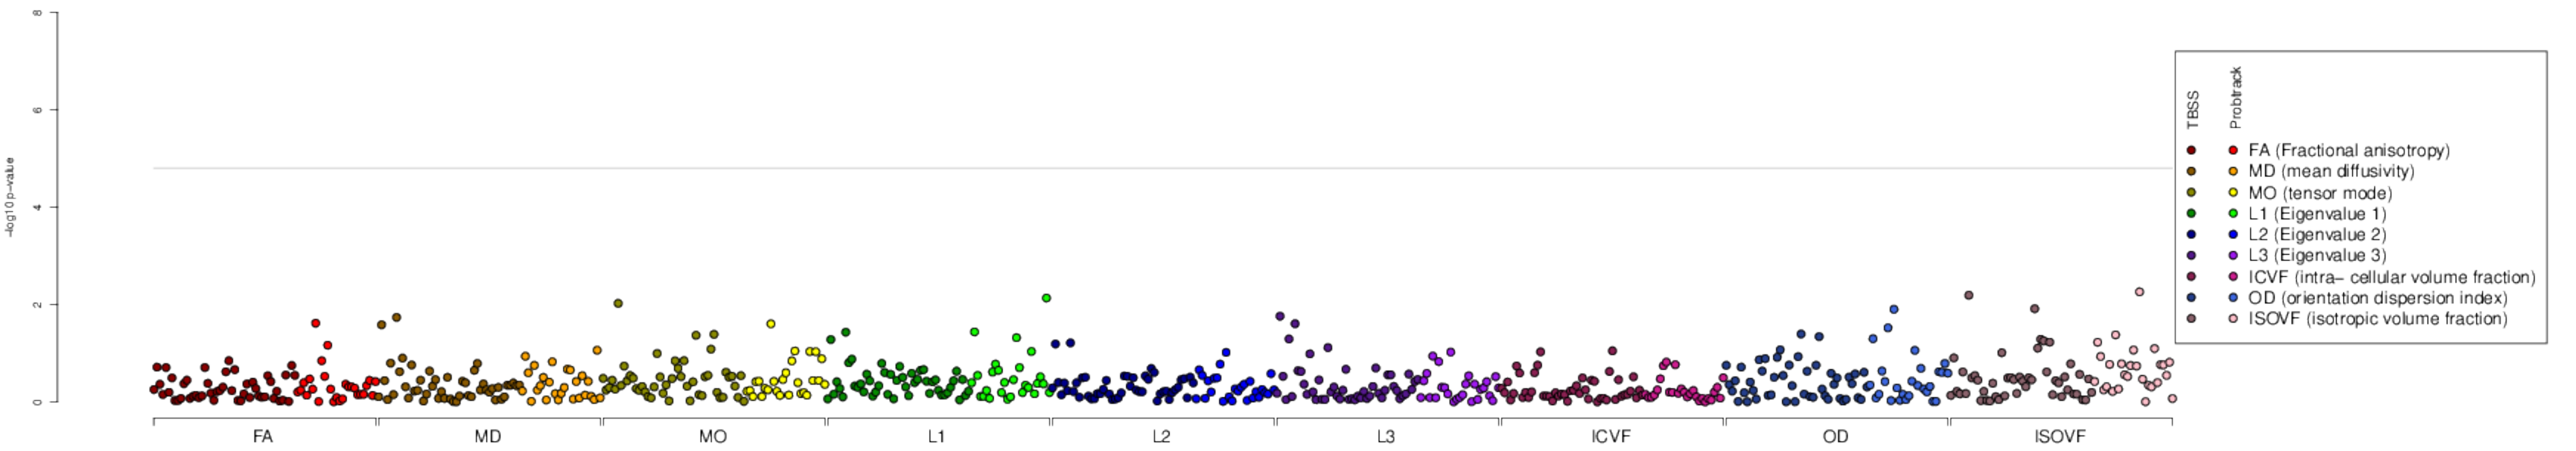

### functional MRI

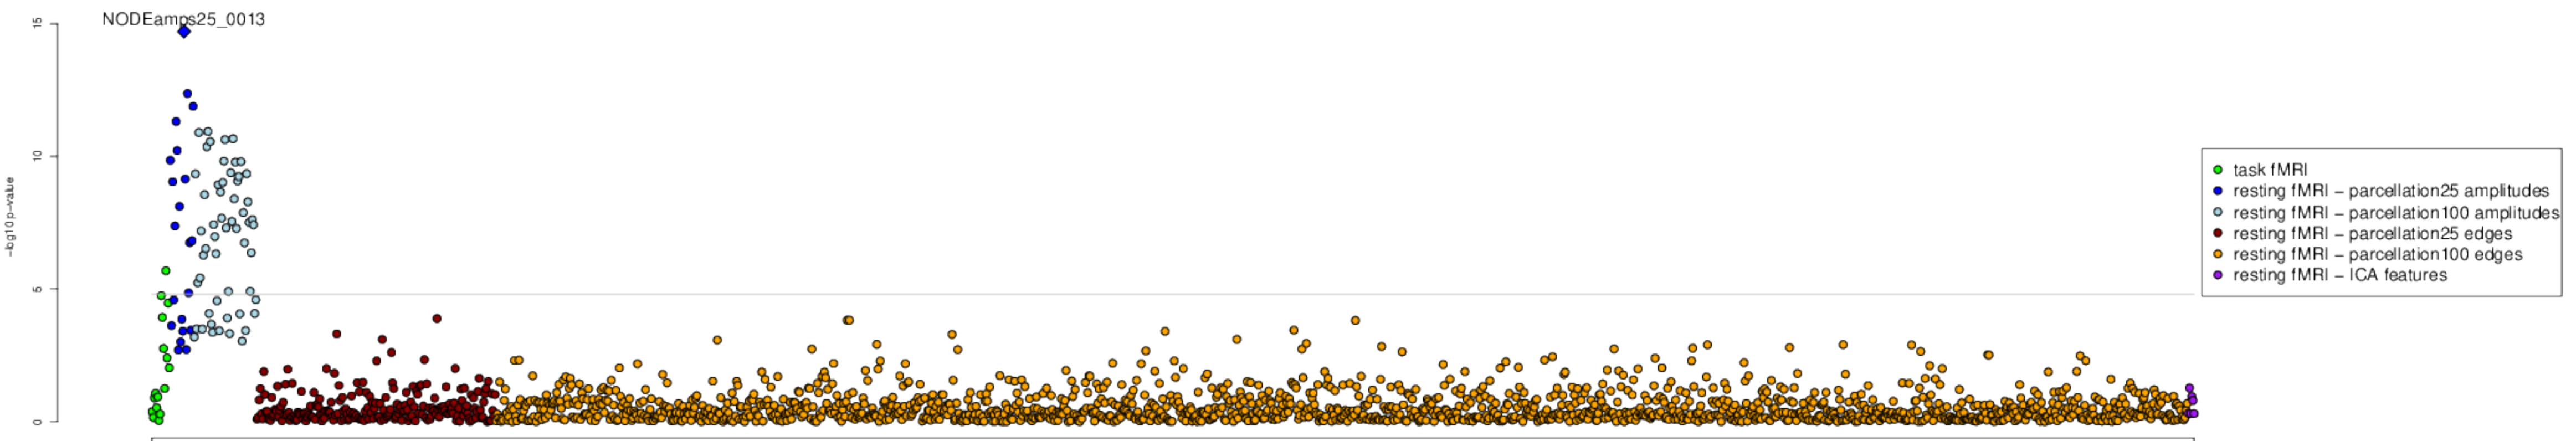

### Structural MRI

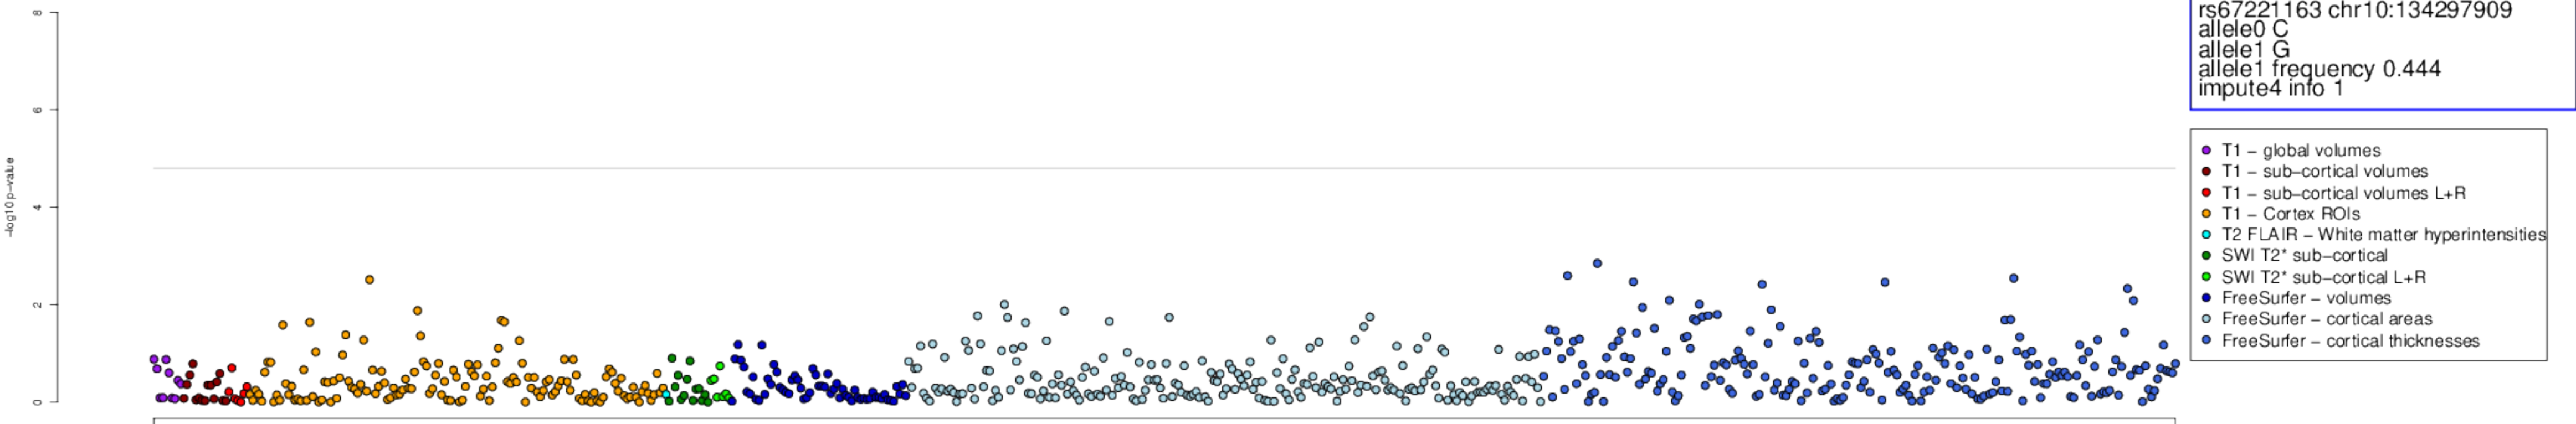

### Structural connectivity (Diffusion MRI)

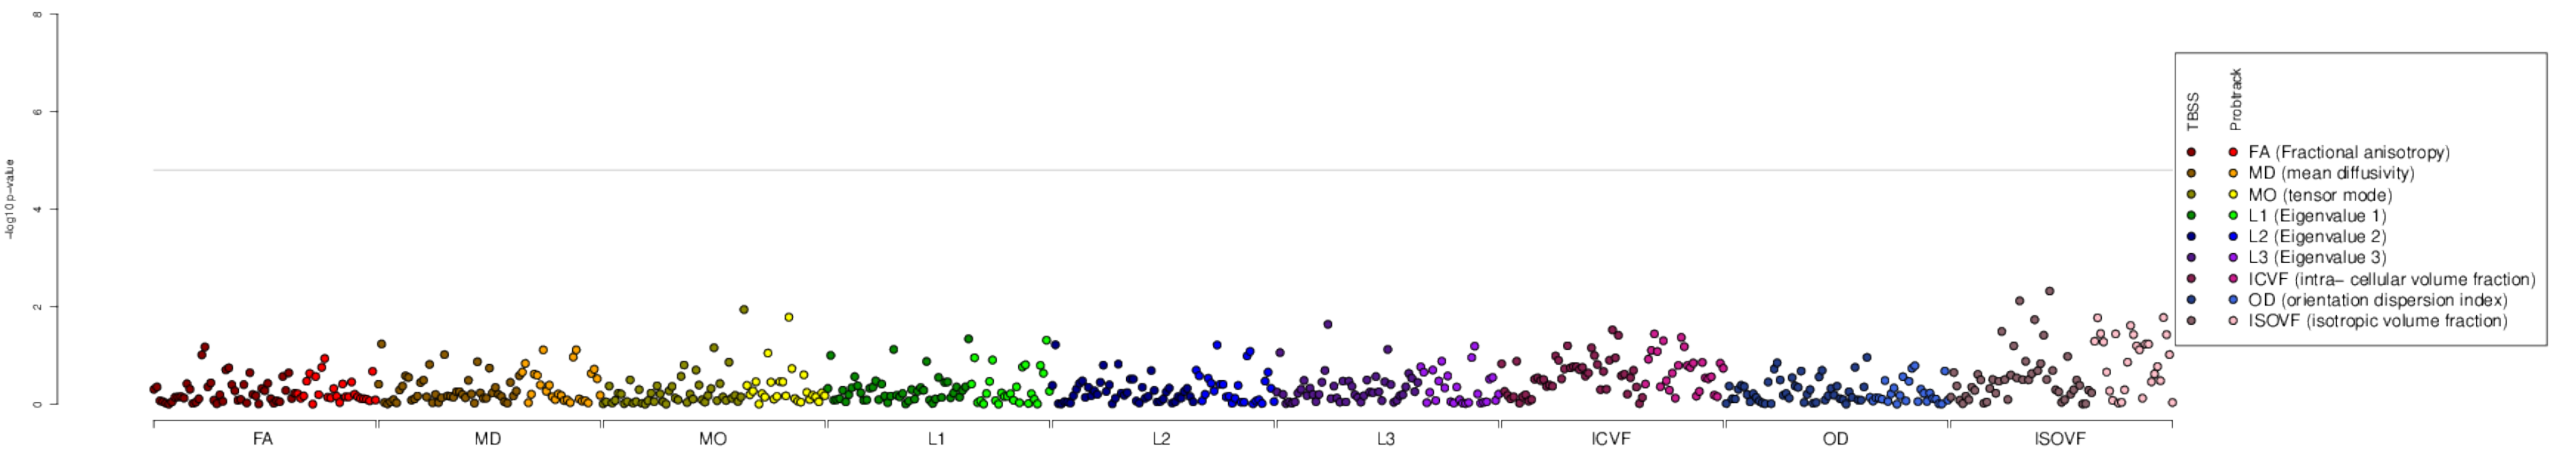

### functional MRI

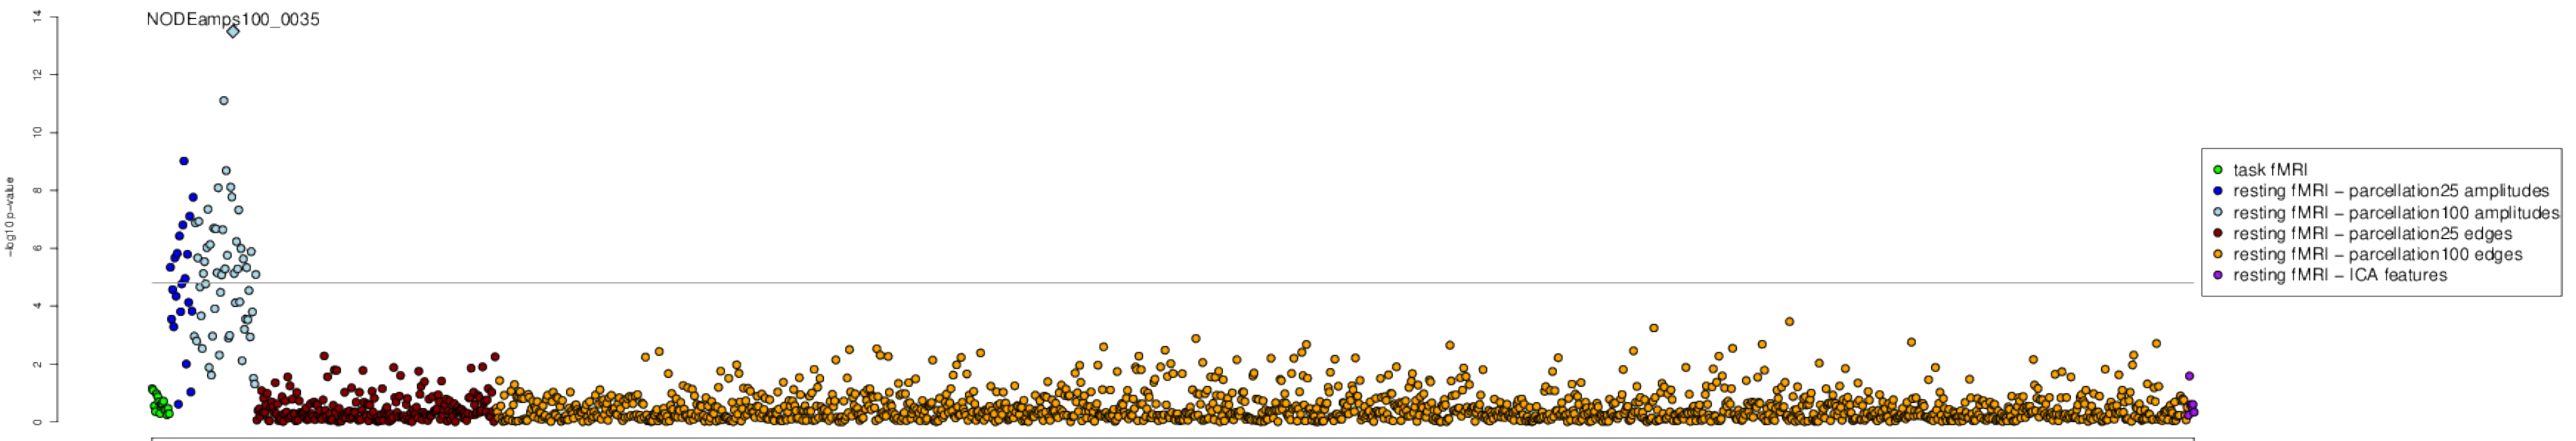

### Structural MRI

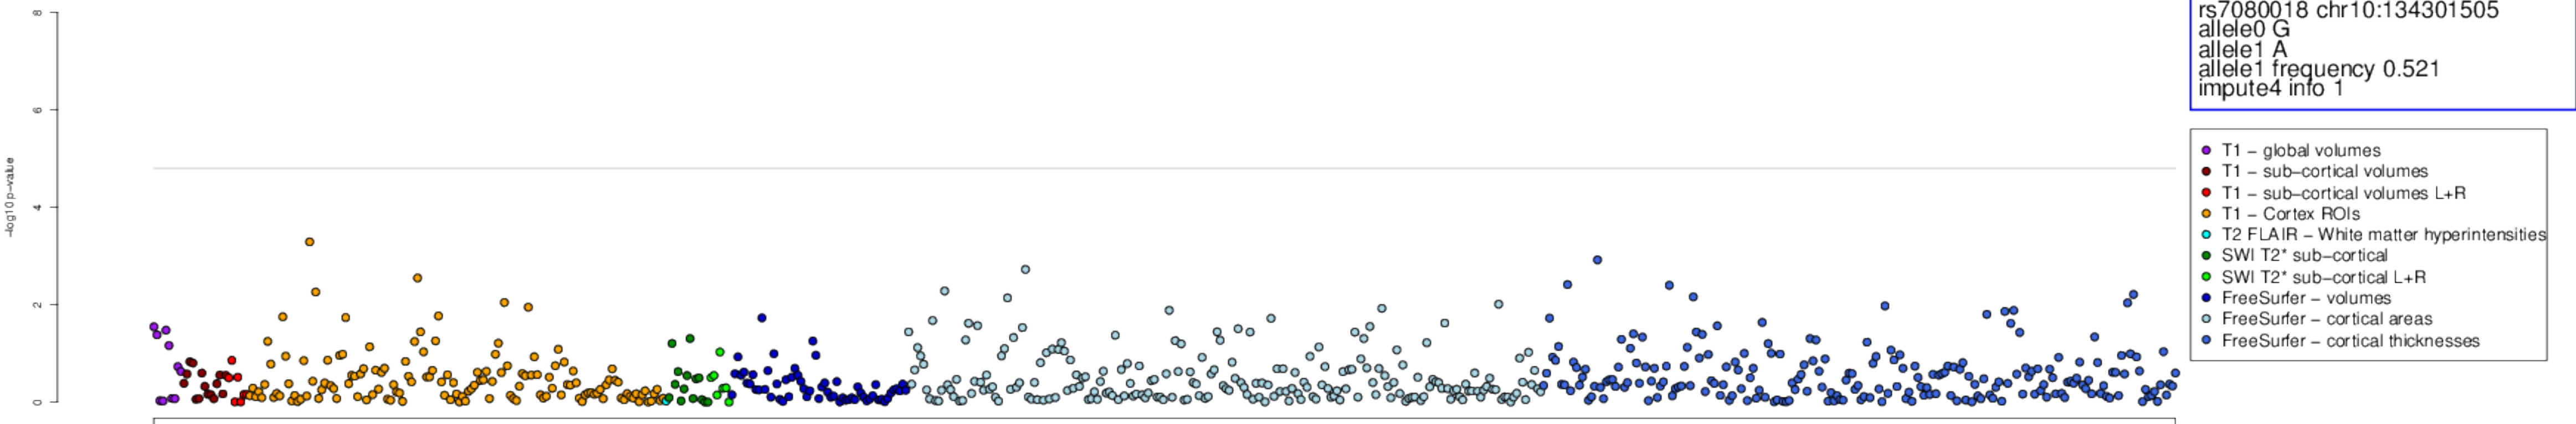

### Structural connectivity (Diffusion MRI)

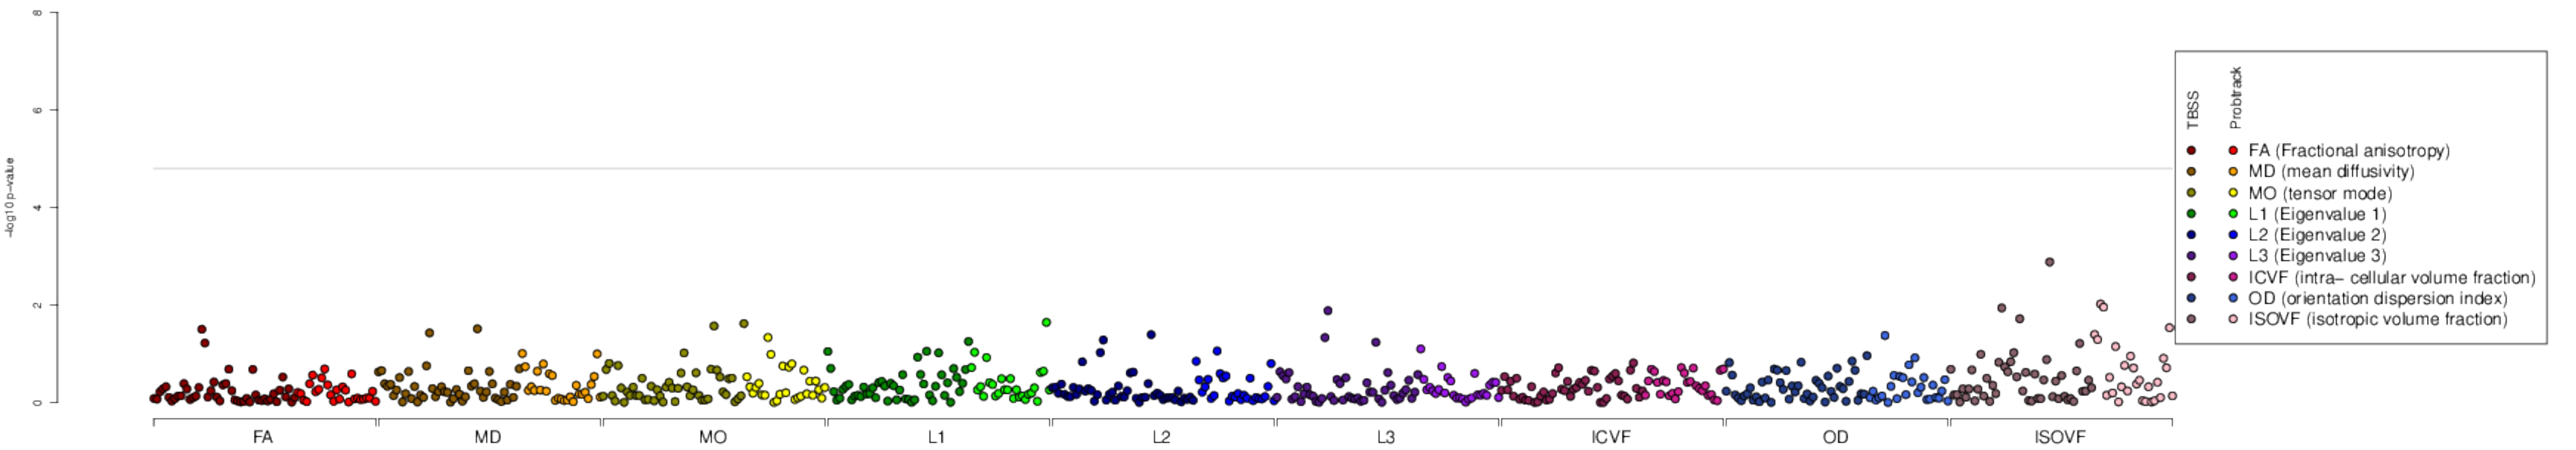

### functional MRI

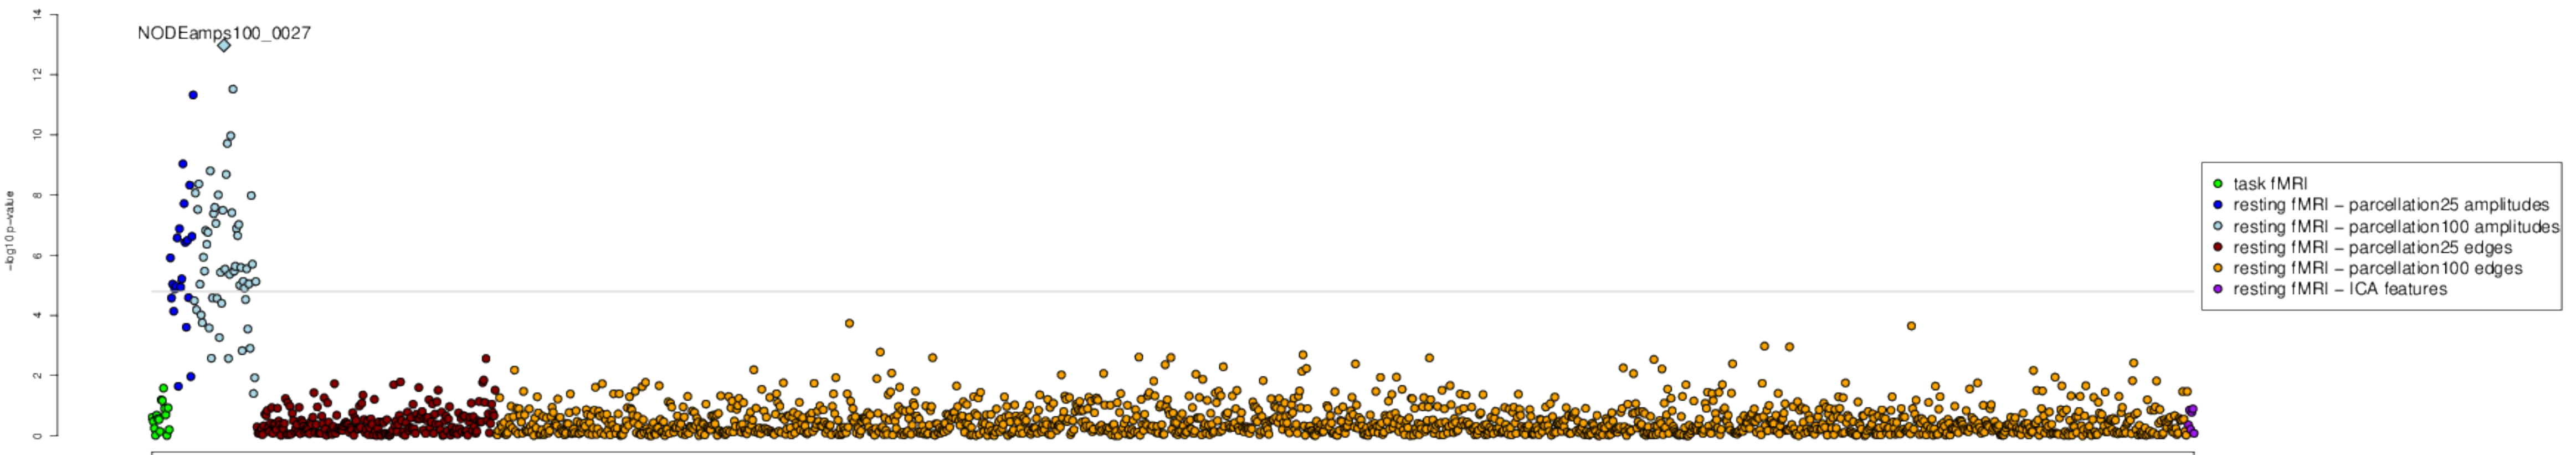

### Structural MRI

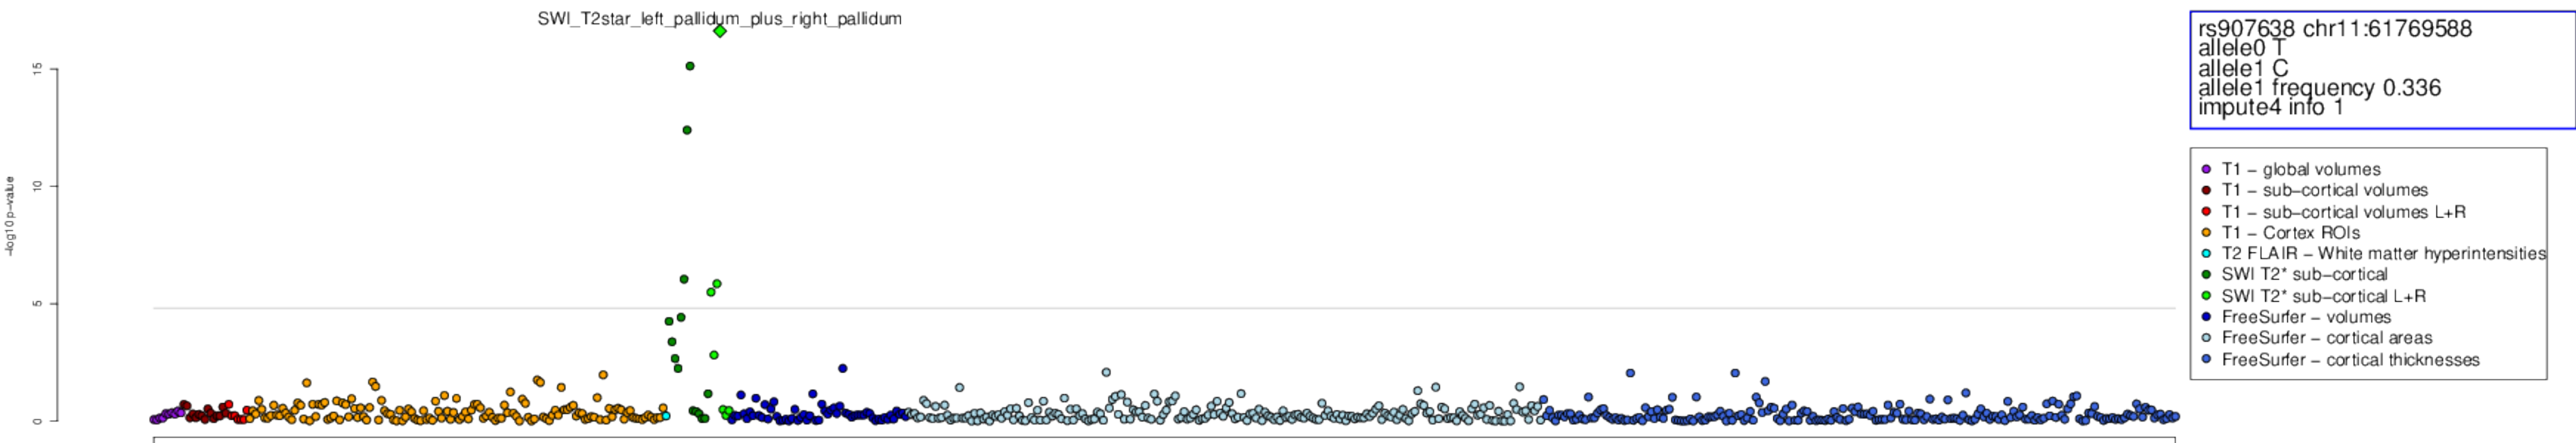

### Structural connectivity (Diffusion MRI)

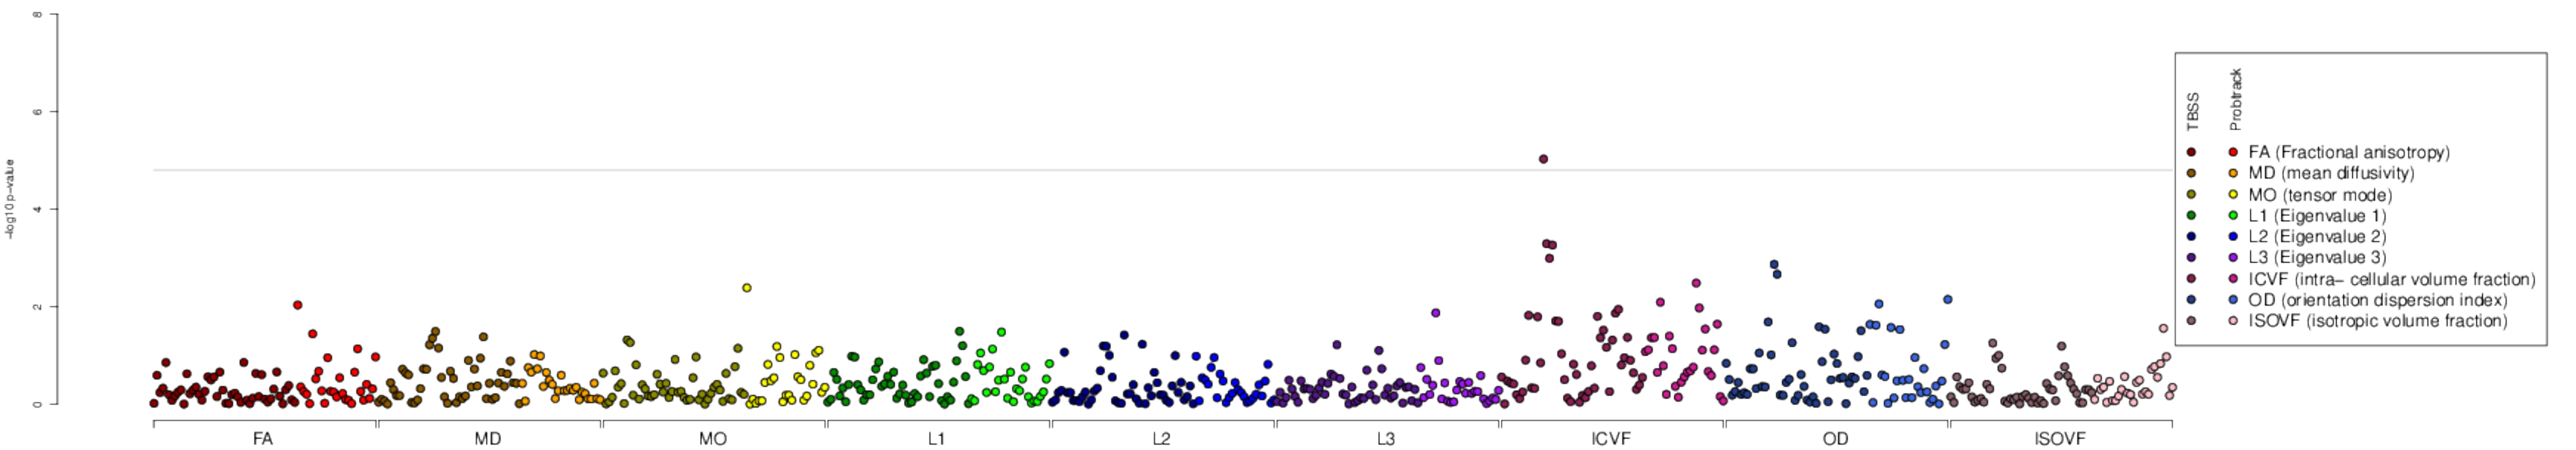

### functional MRI

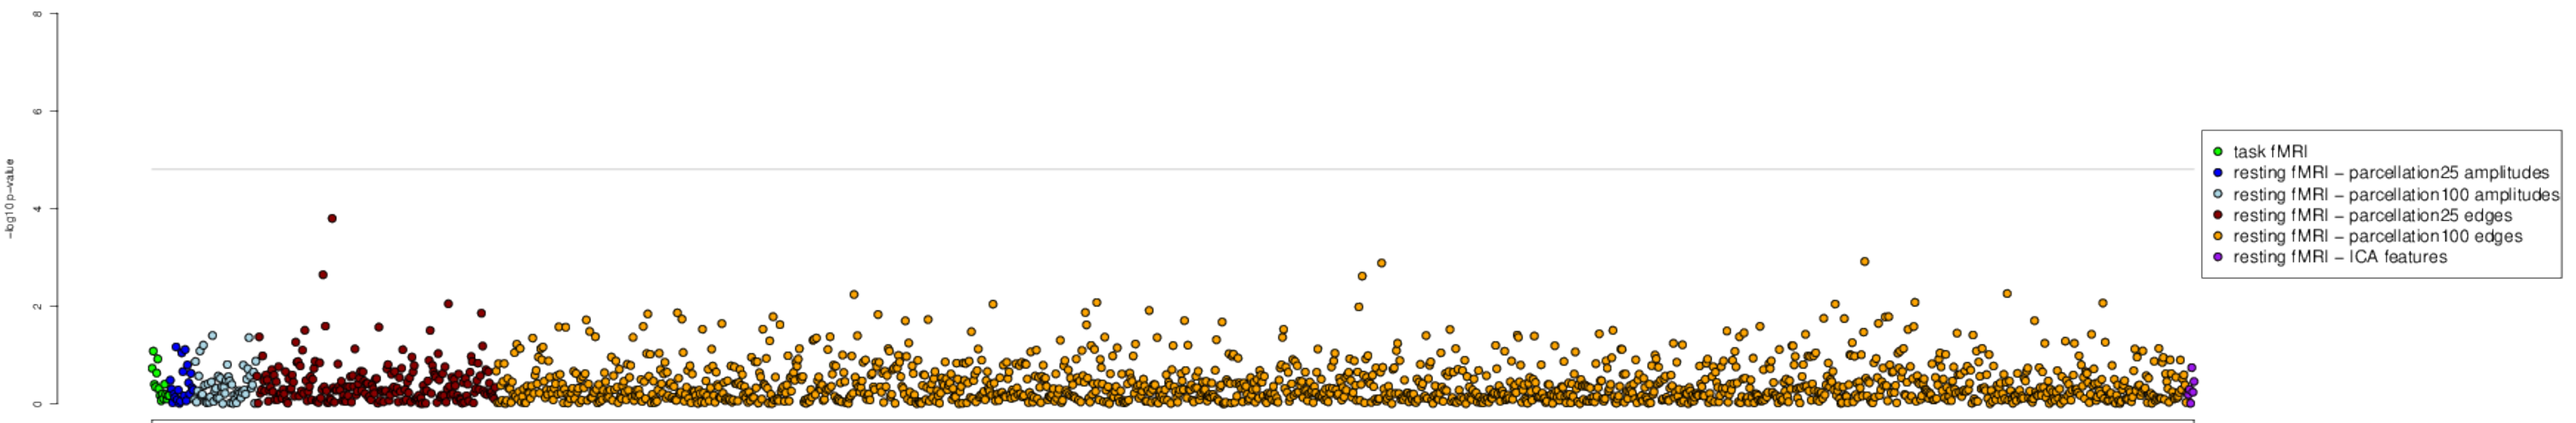

### Structural MRI

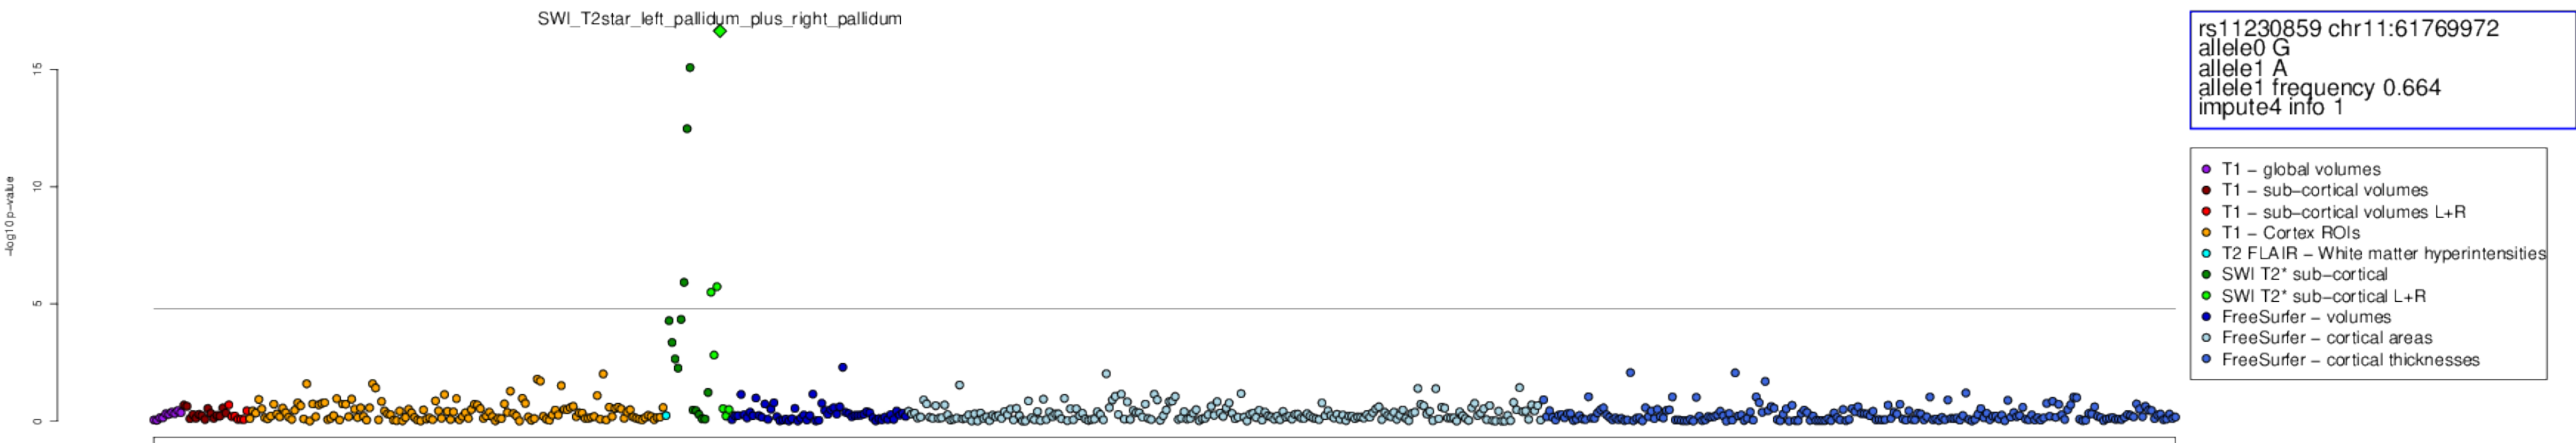

### Structural connectivity (Diffusion MRI)

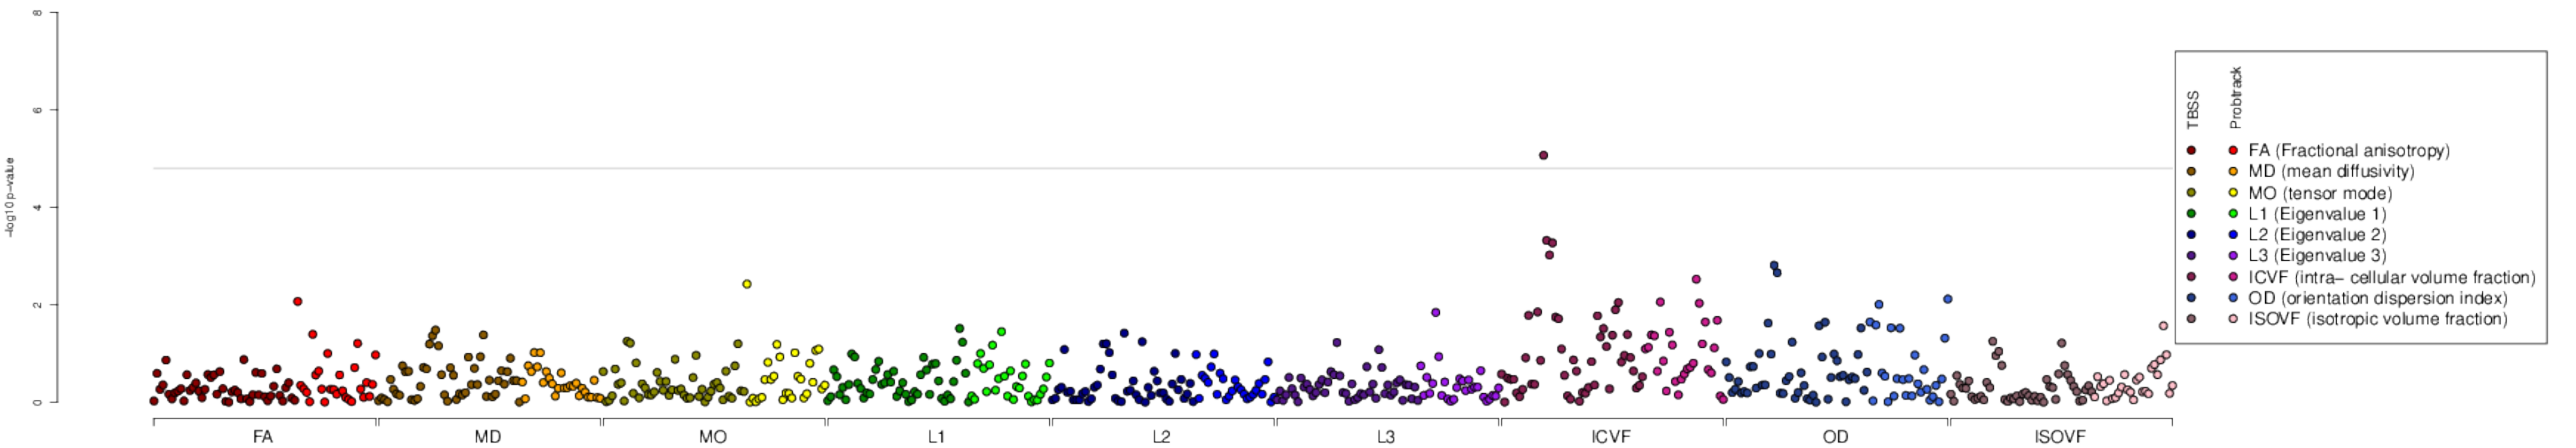

### functional MRI

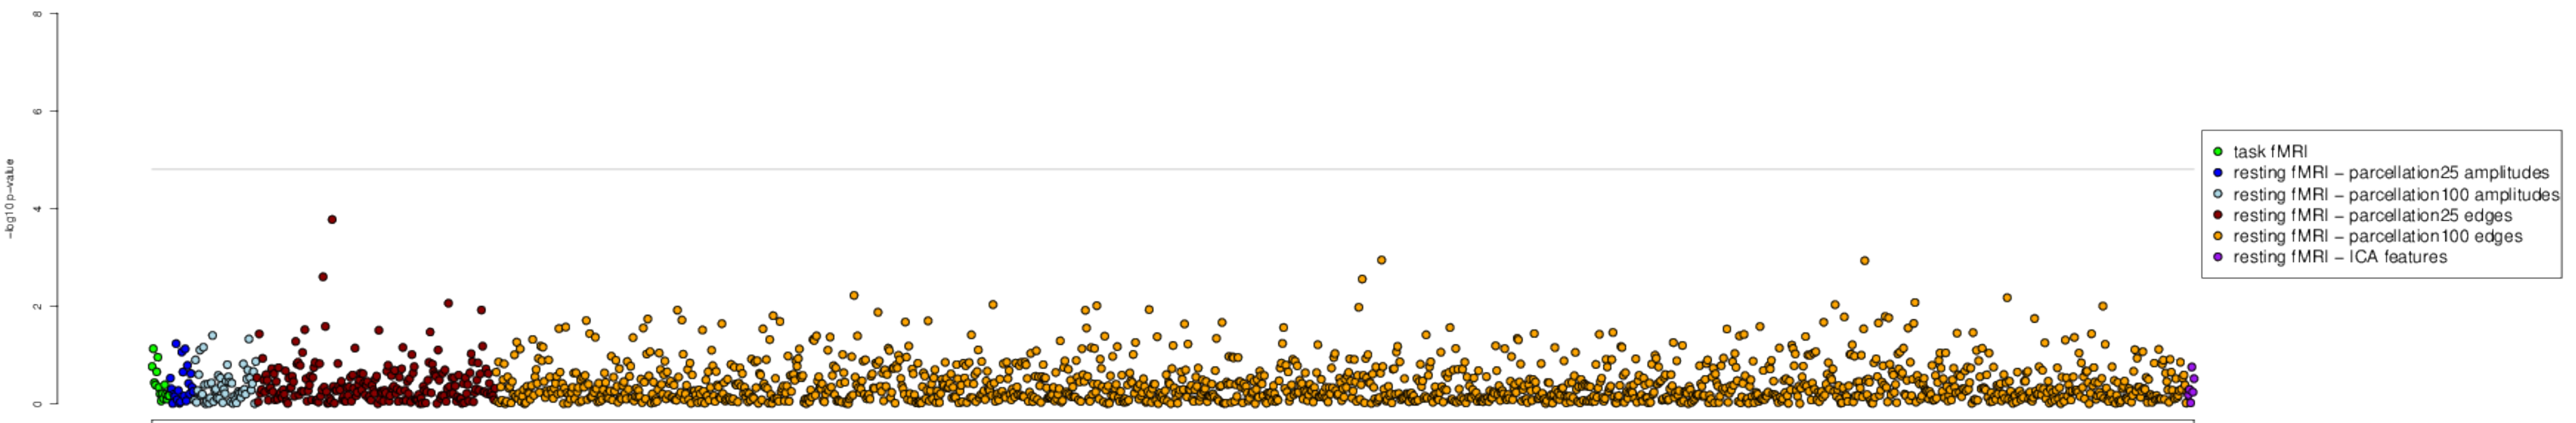



### Structural MRI

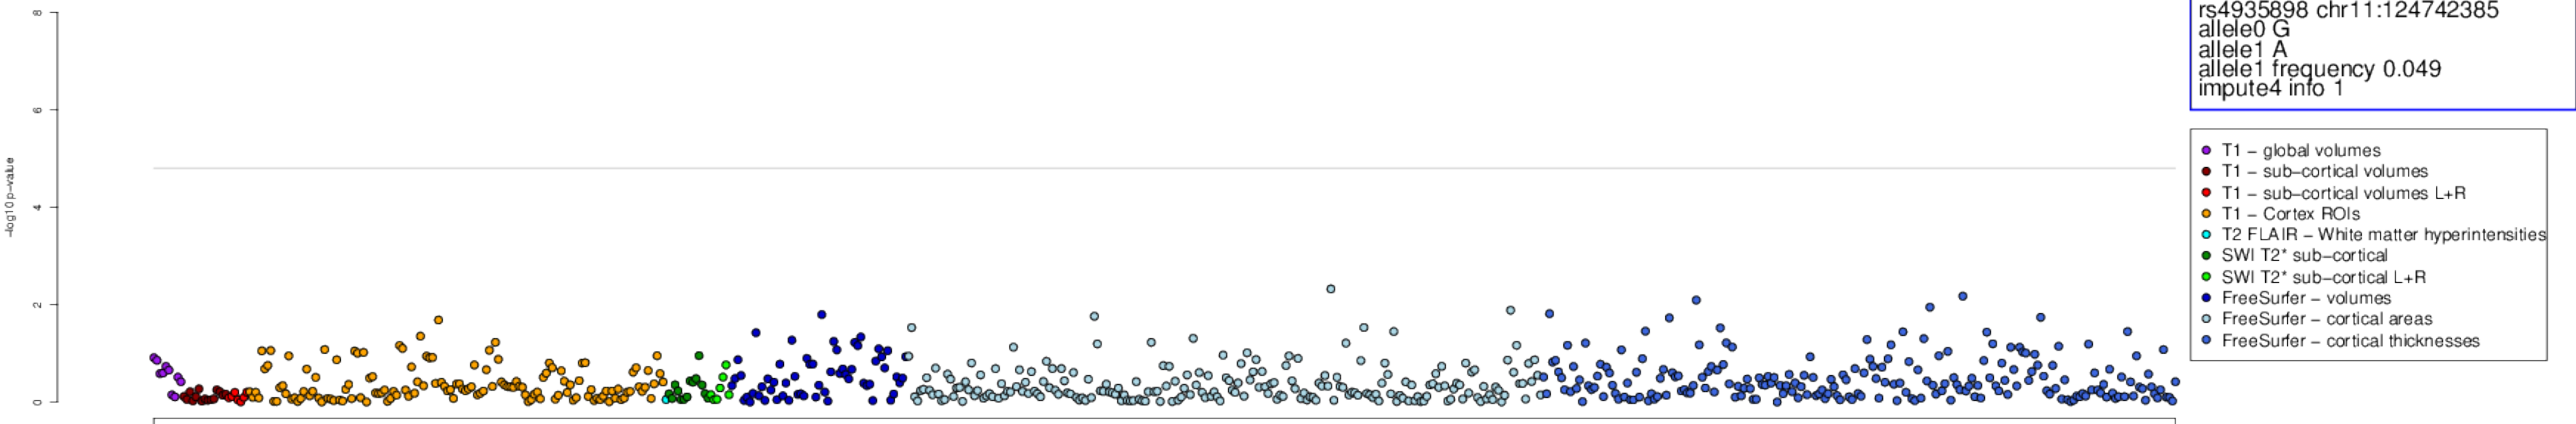

### Structural connectivity (Diffusion MRI)

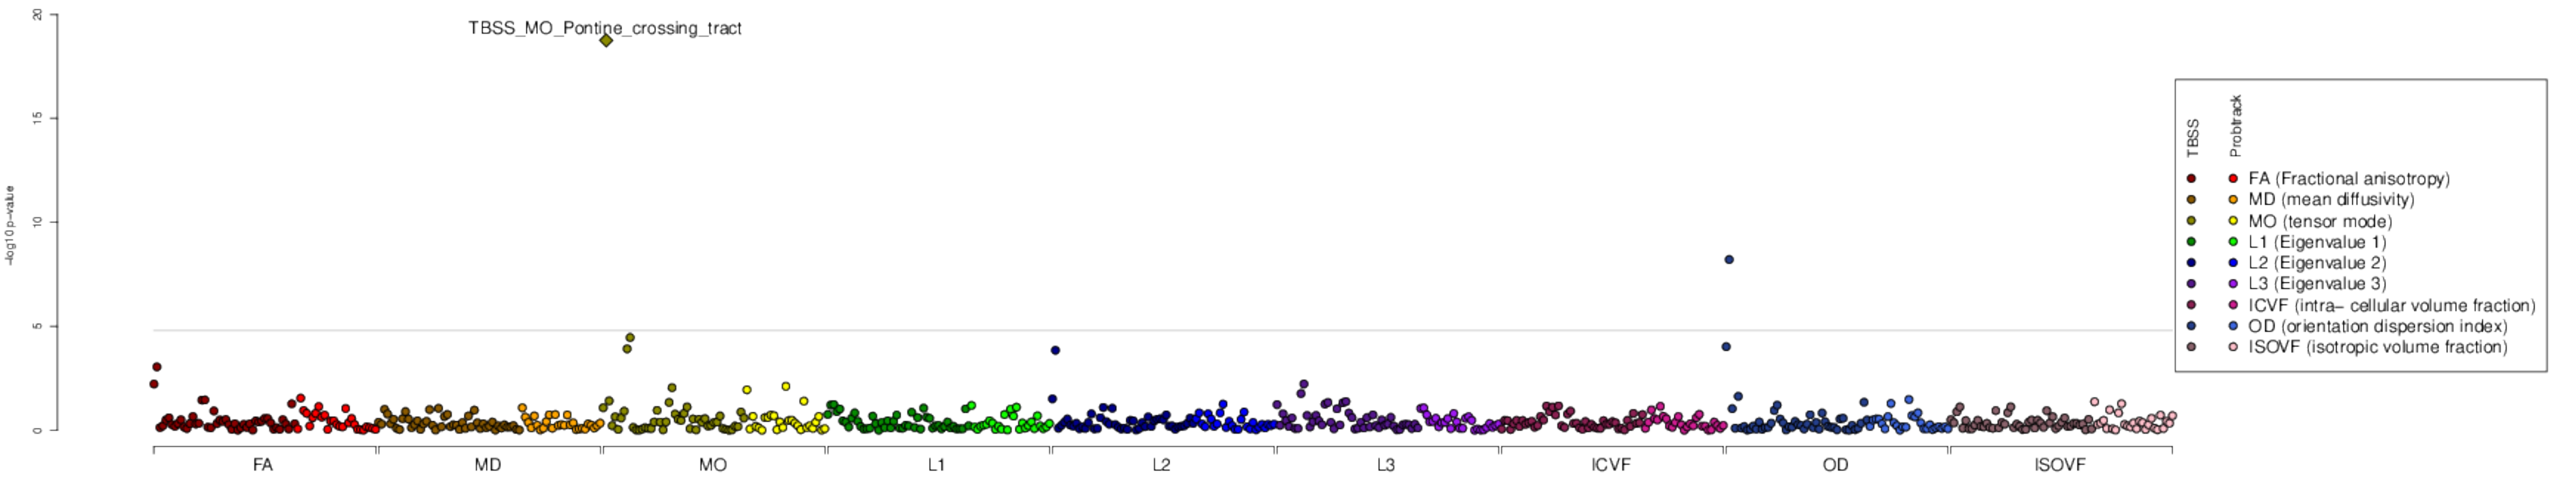

### functional MRI

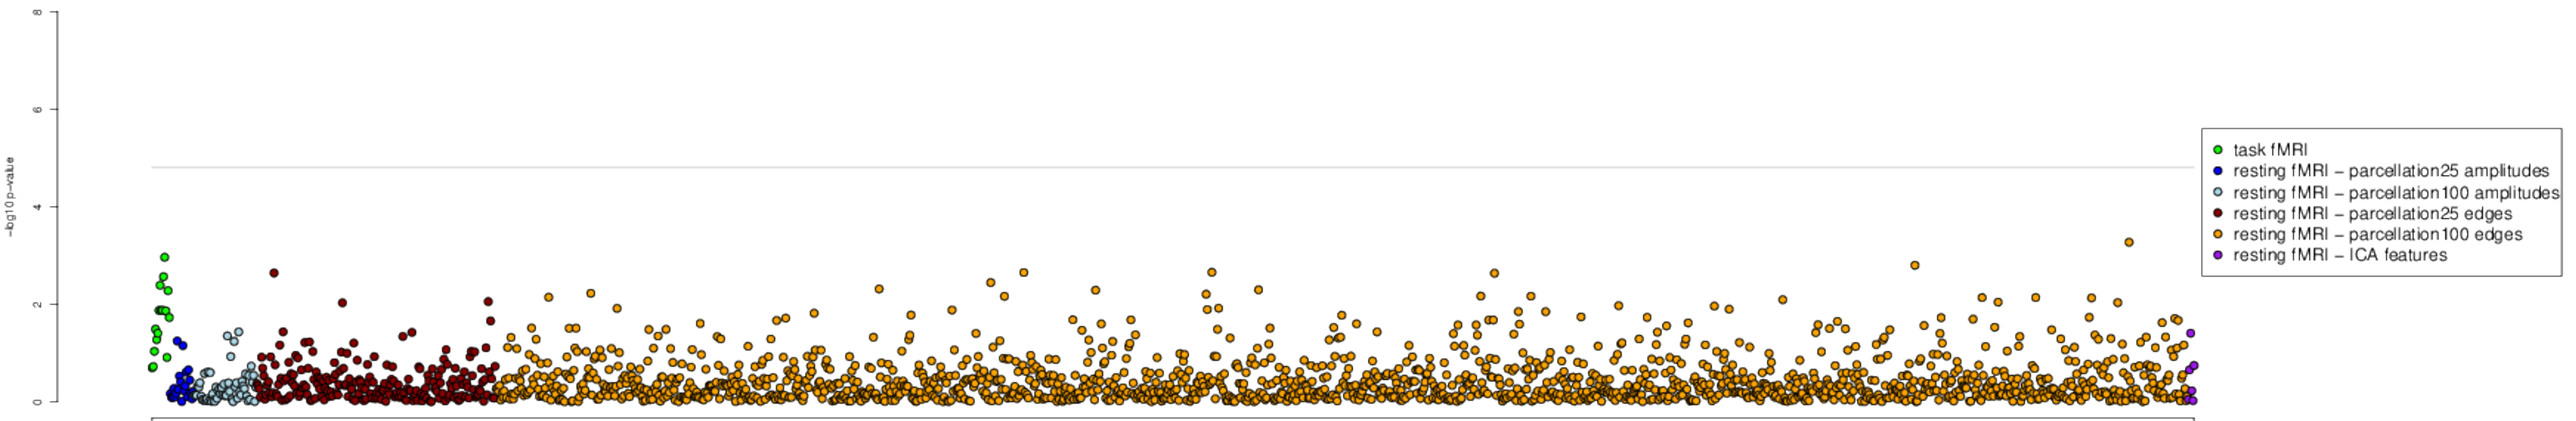

### Structural MRI

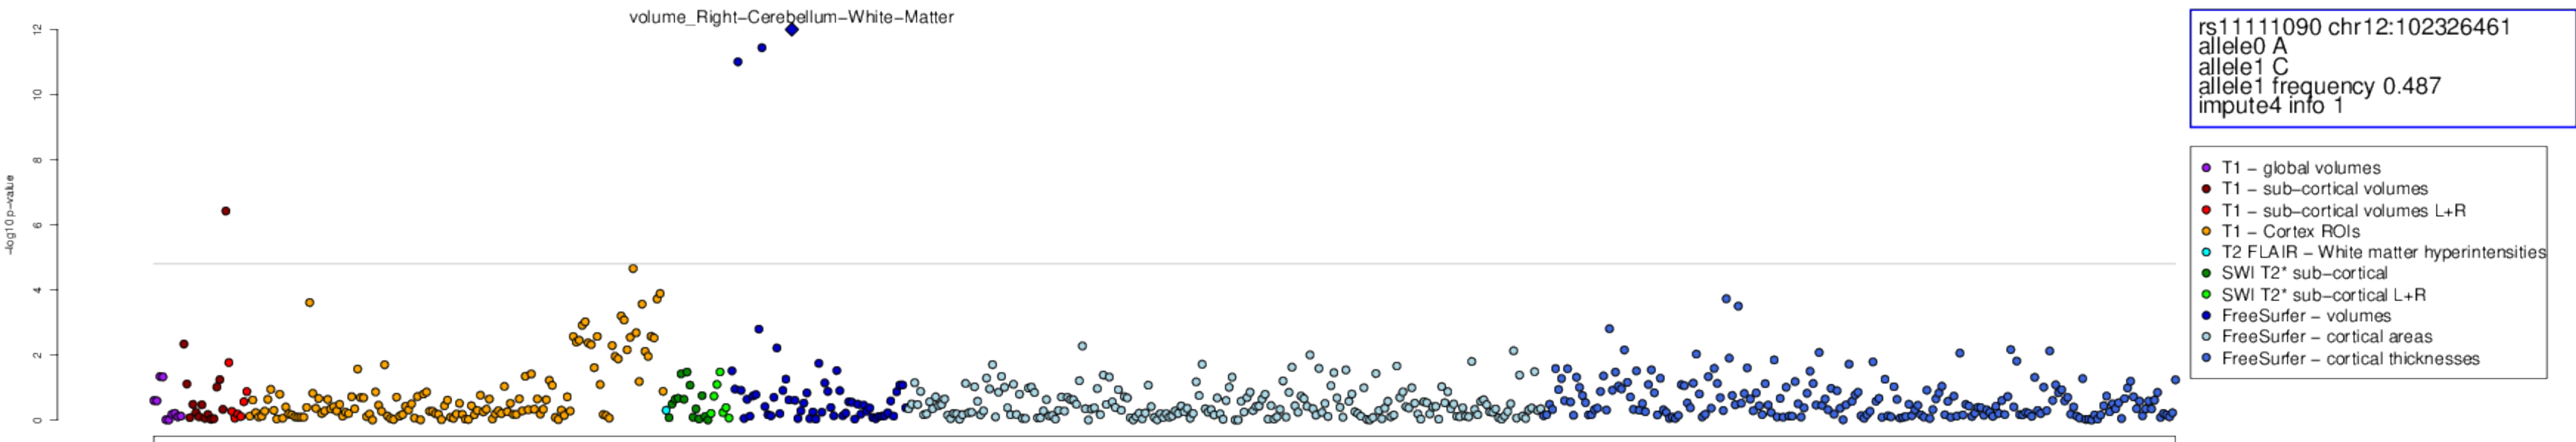

### Structural connectivity (Diffusion MRI)

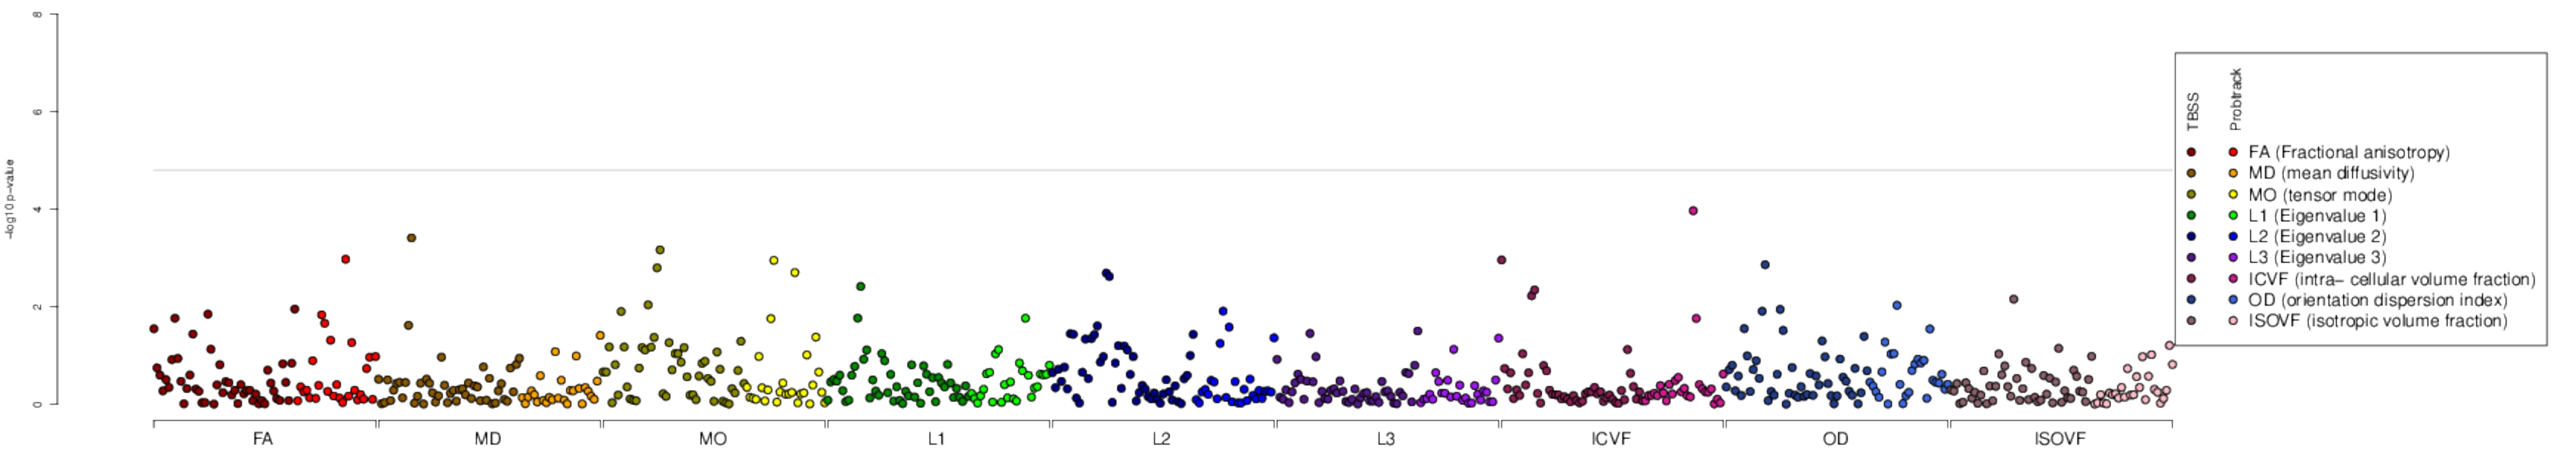

### functional MRI

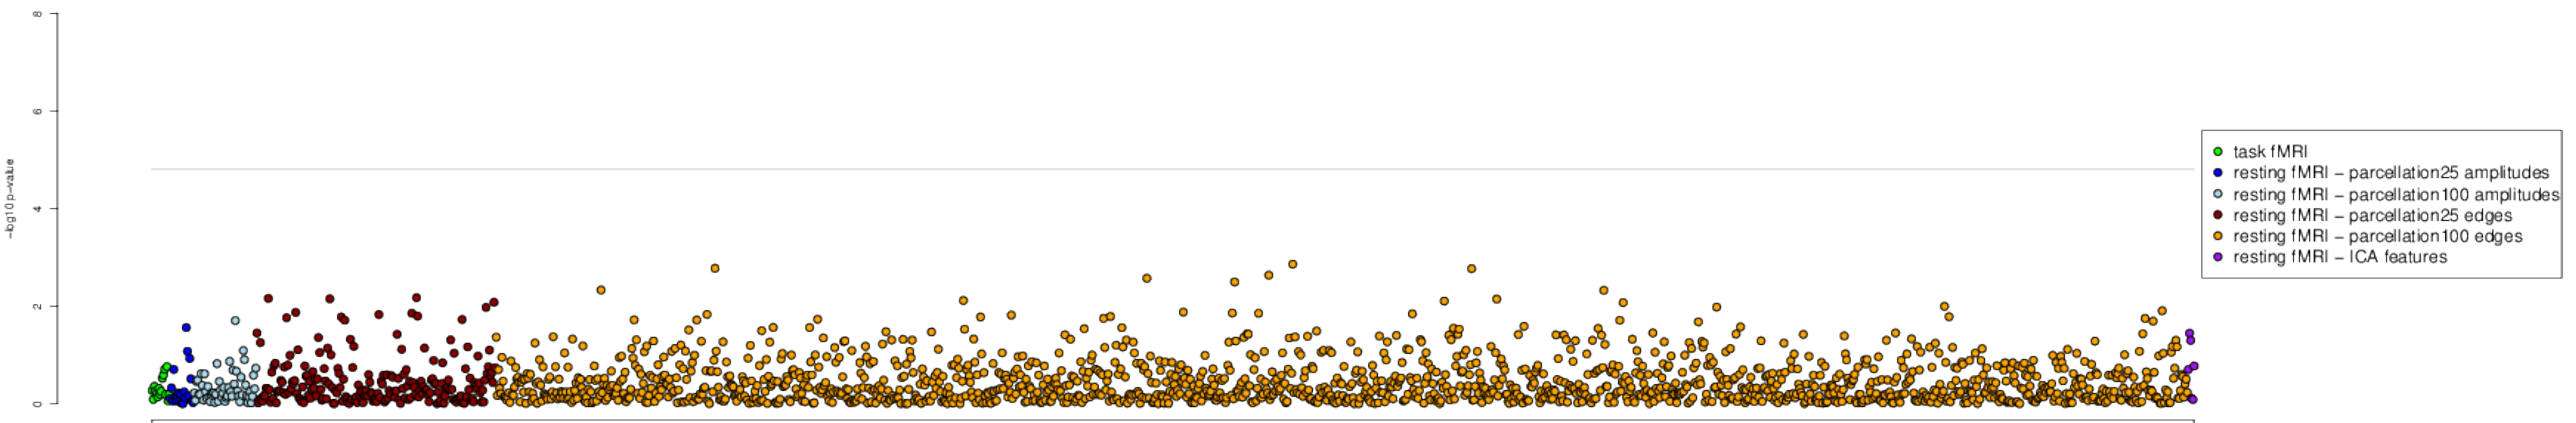

### Structural MRI

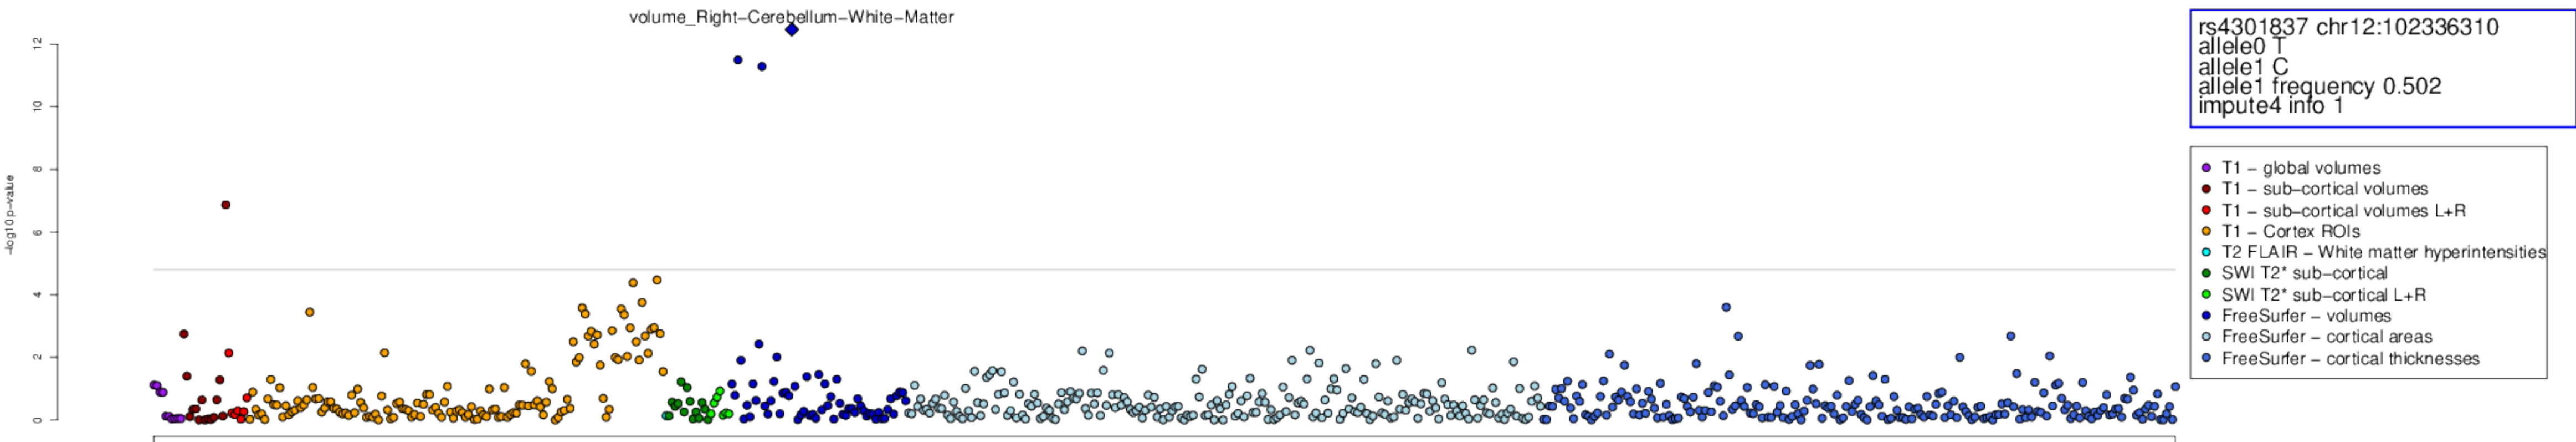

### Structural connectivity (Diffusion MRI)

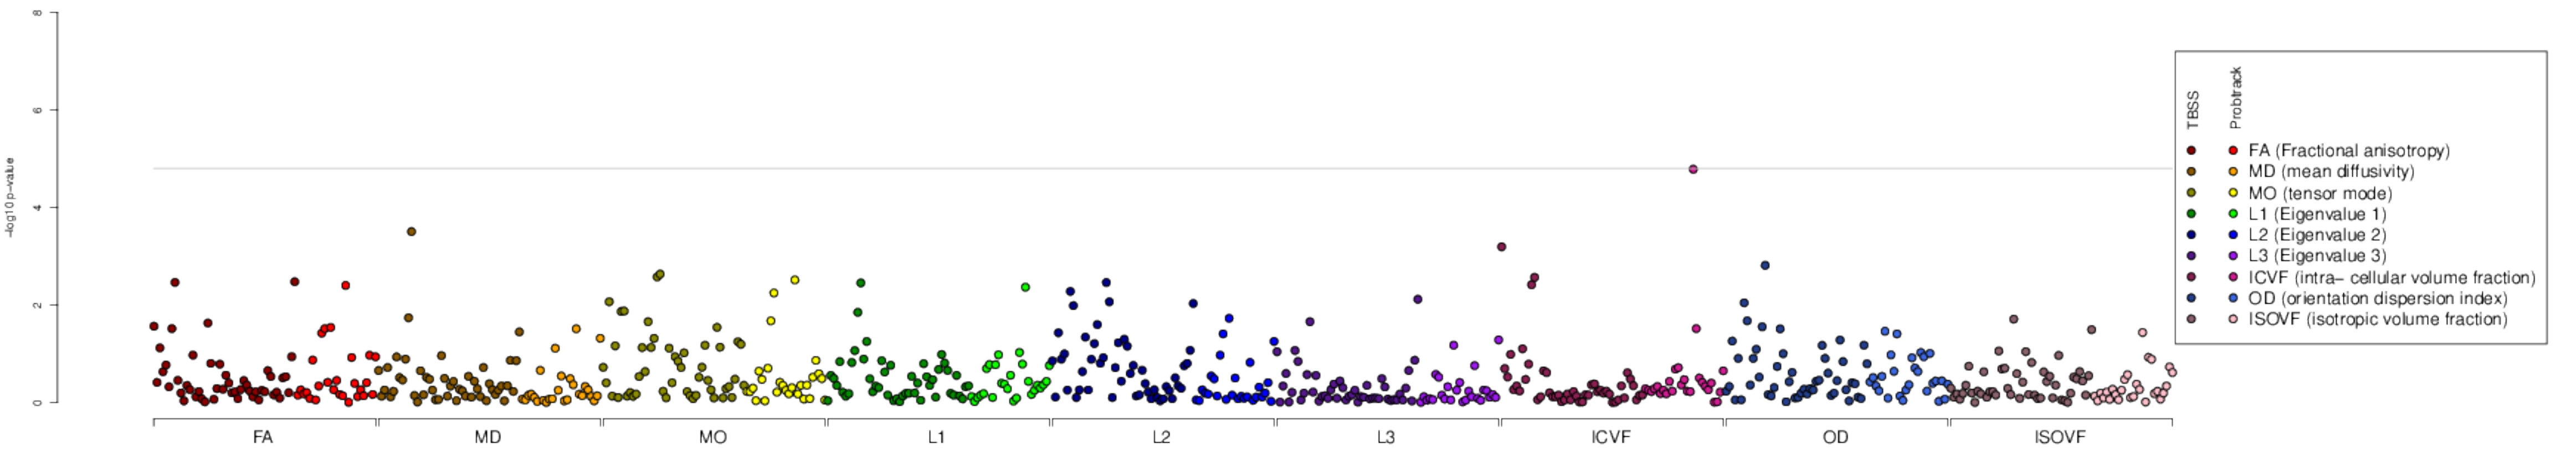

### functional MRI

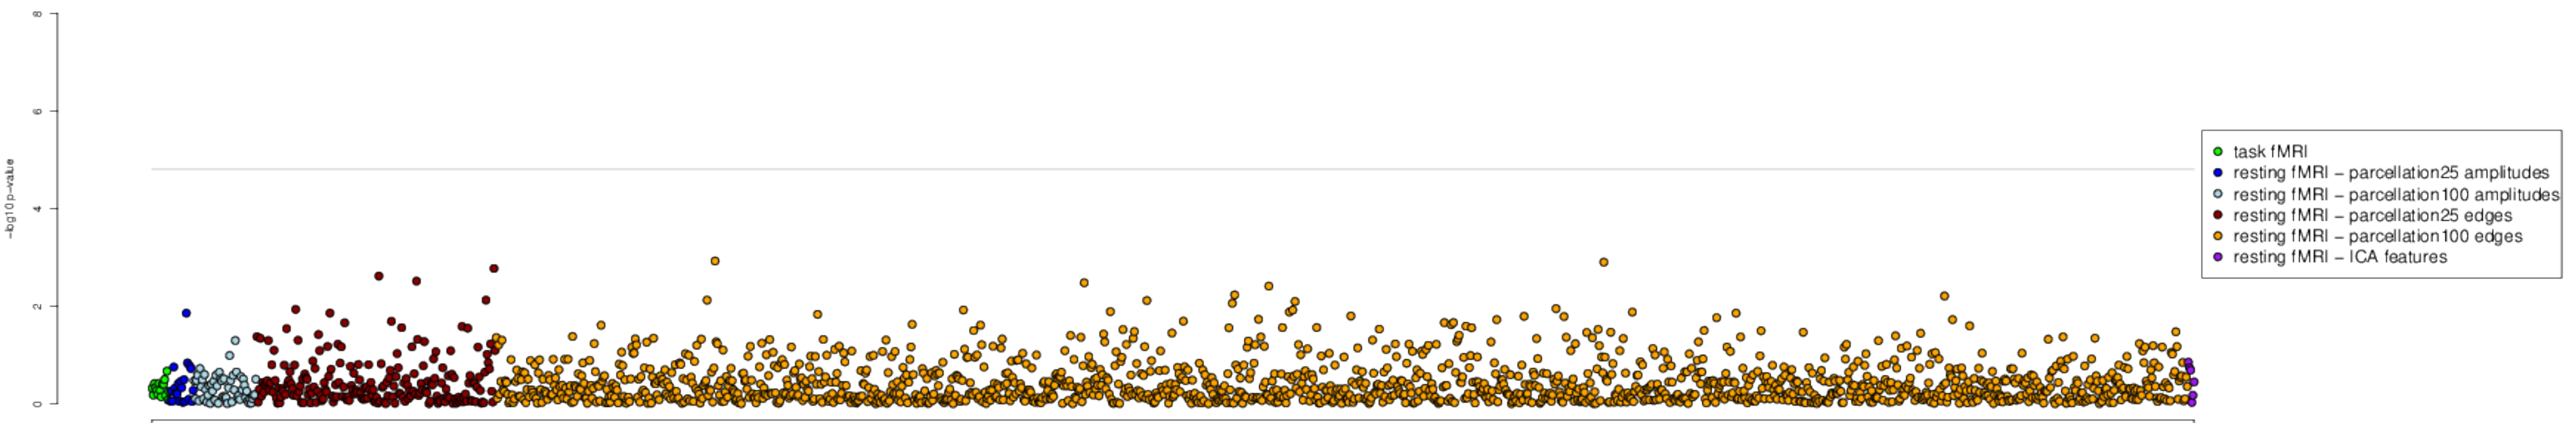

### Structural MRI

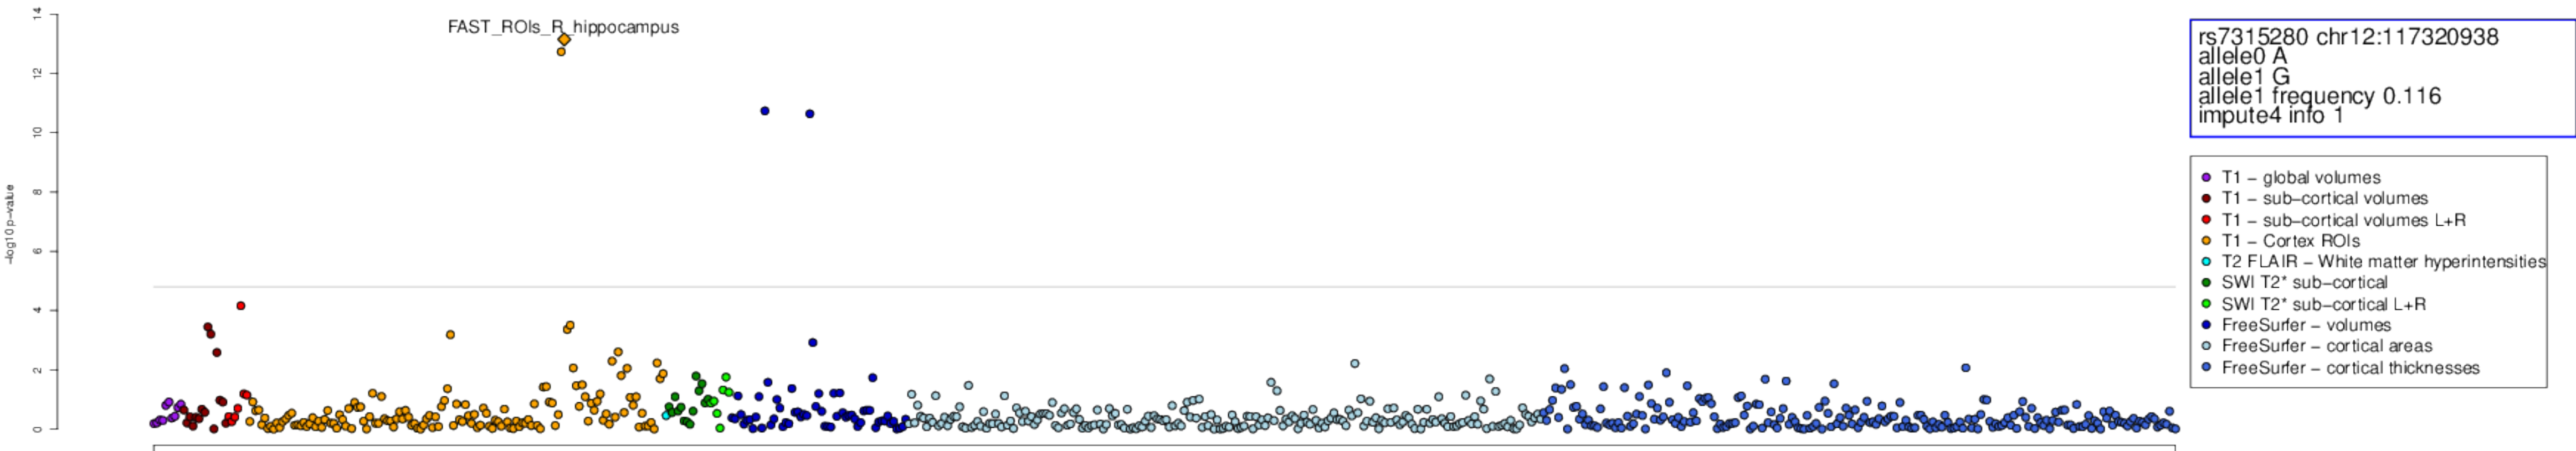

### Structural connectivity (Diffusion MRI)

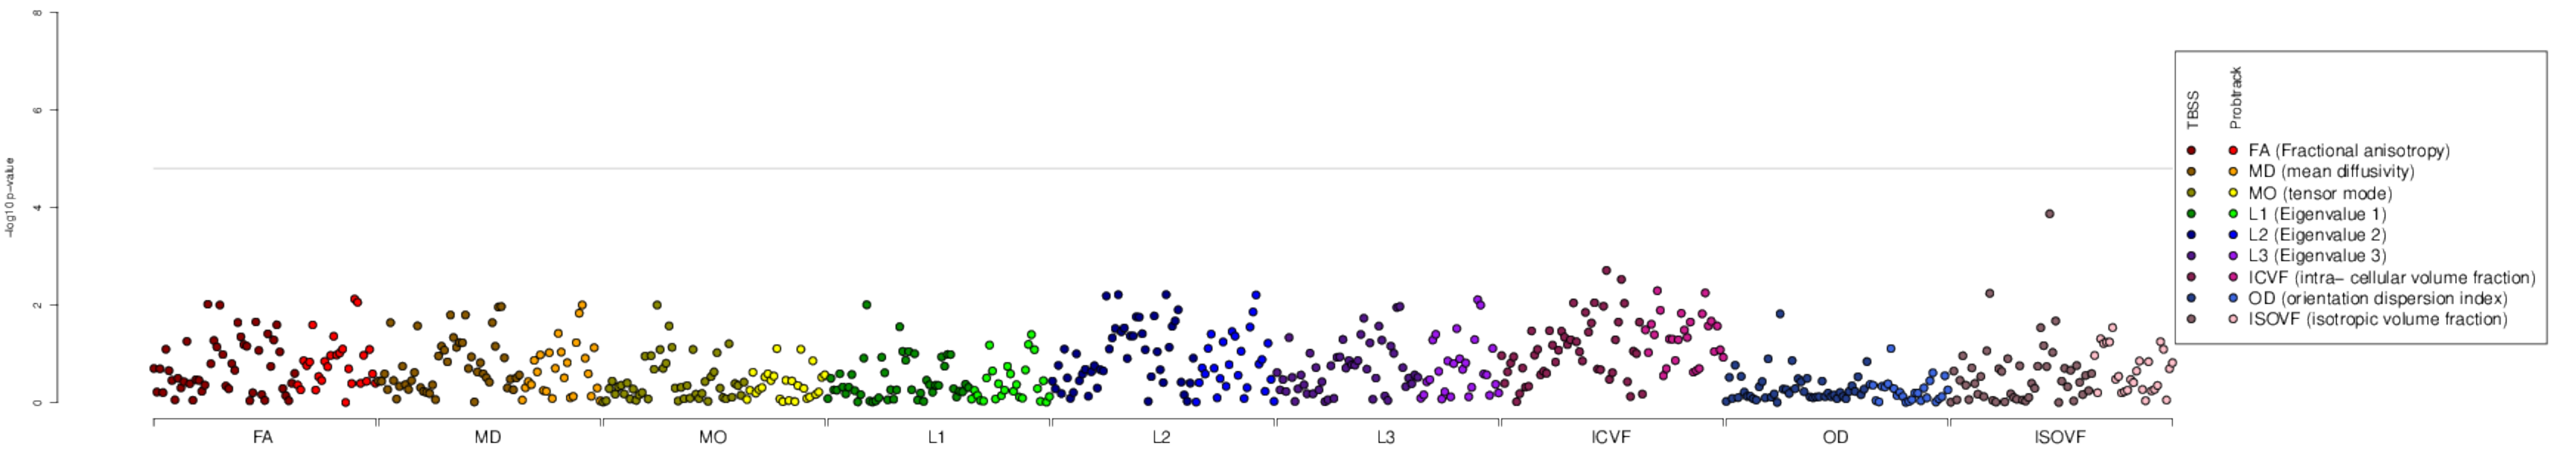

### functional MRI

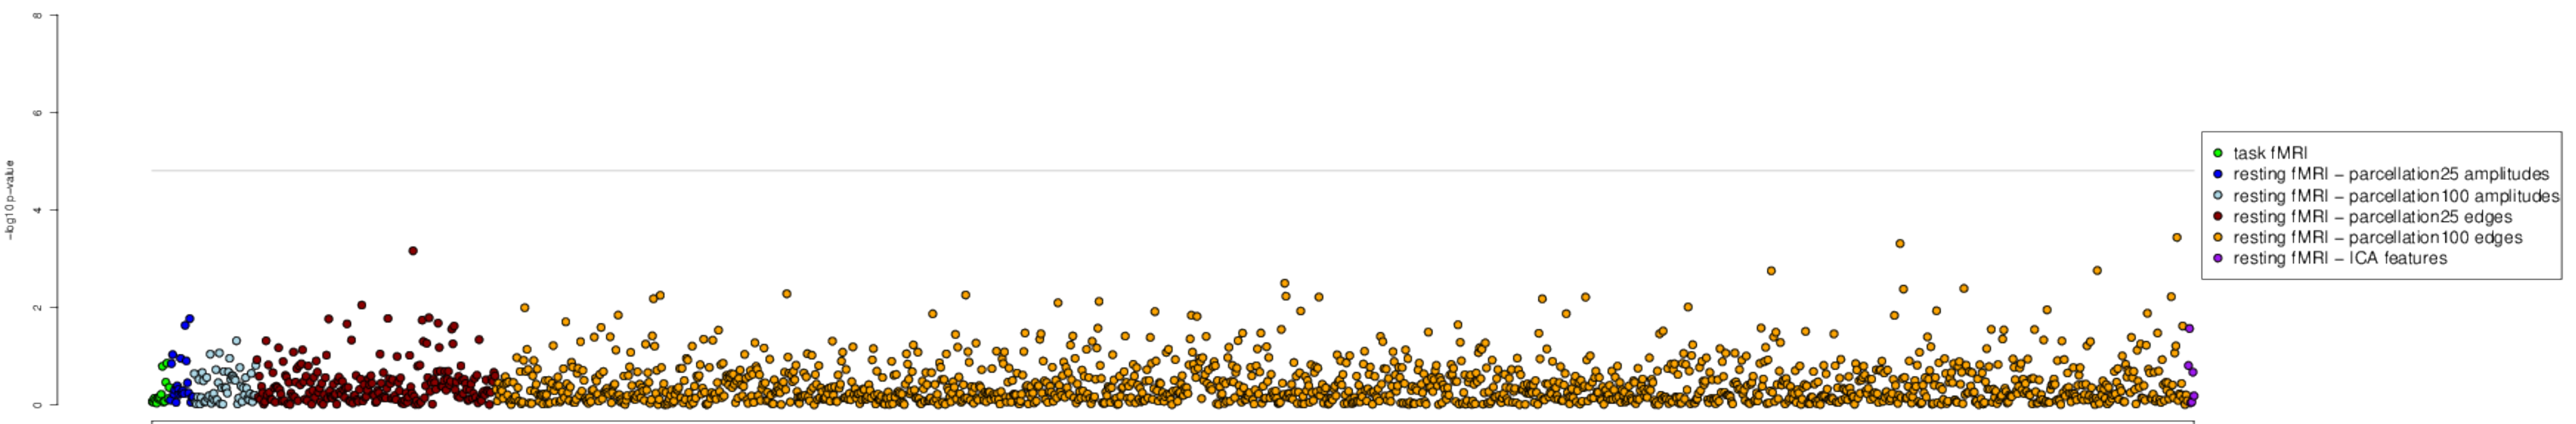

### Structural MRI

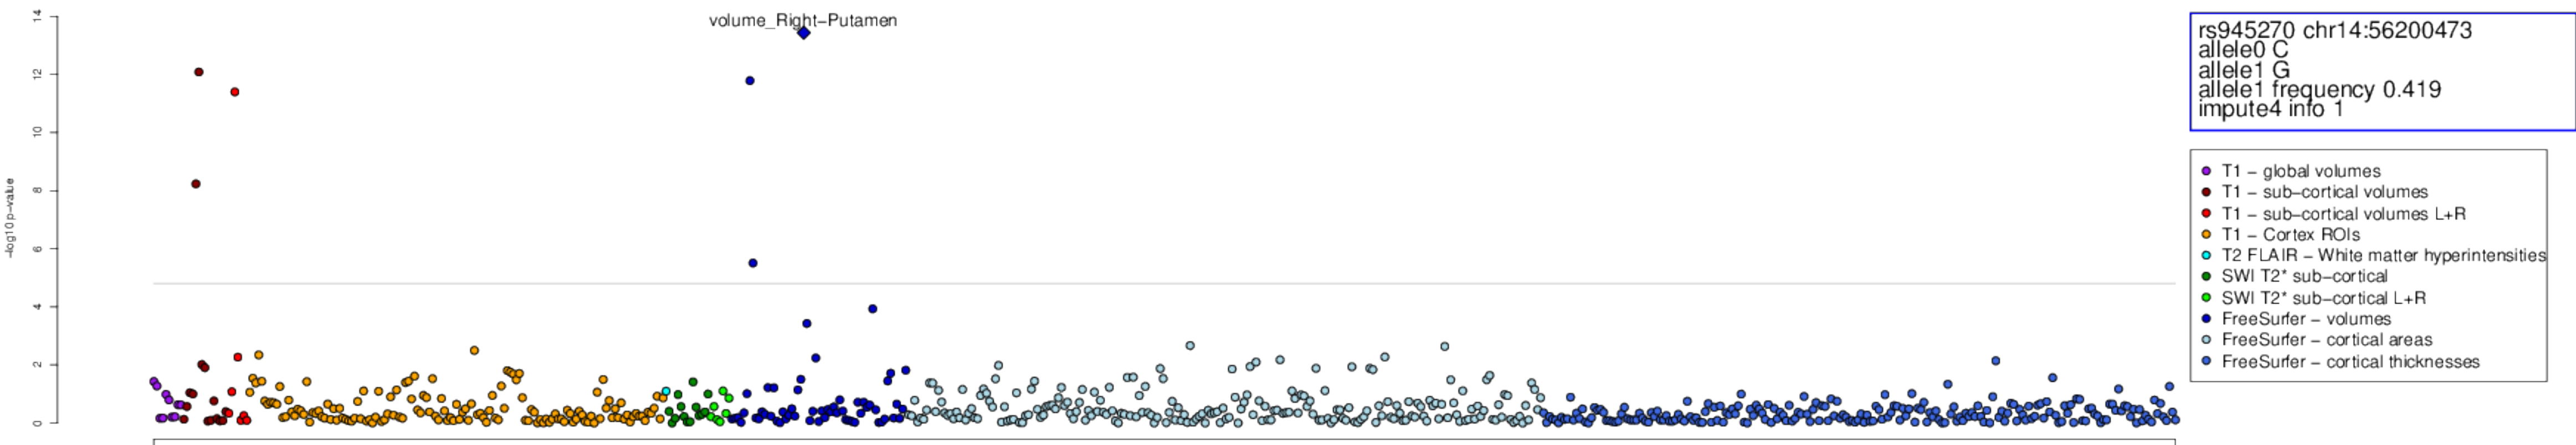

### Structural connectivity (Diffusion MRI)

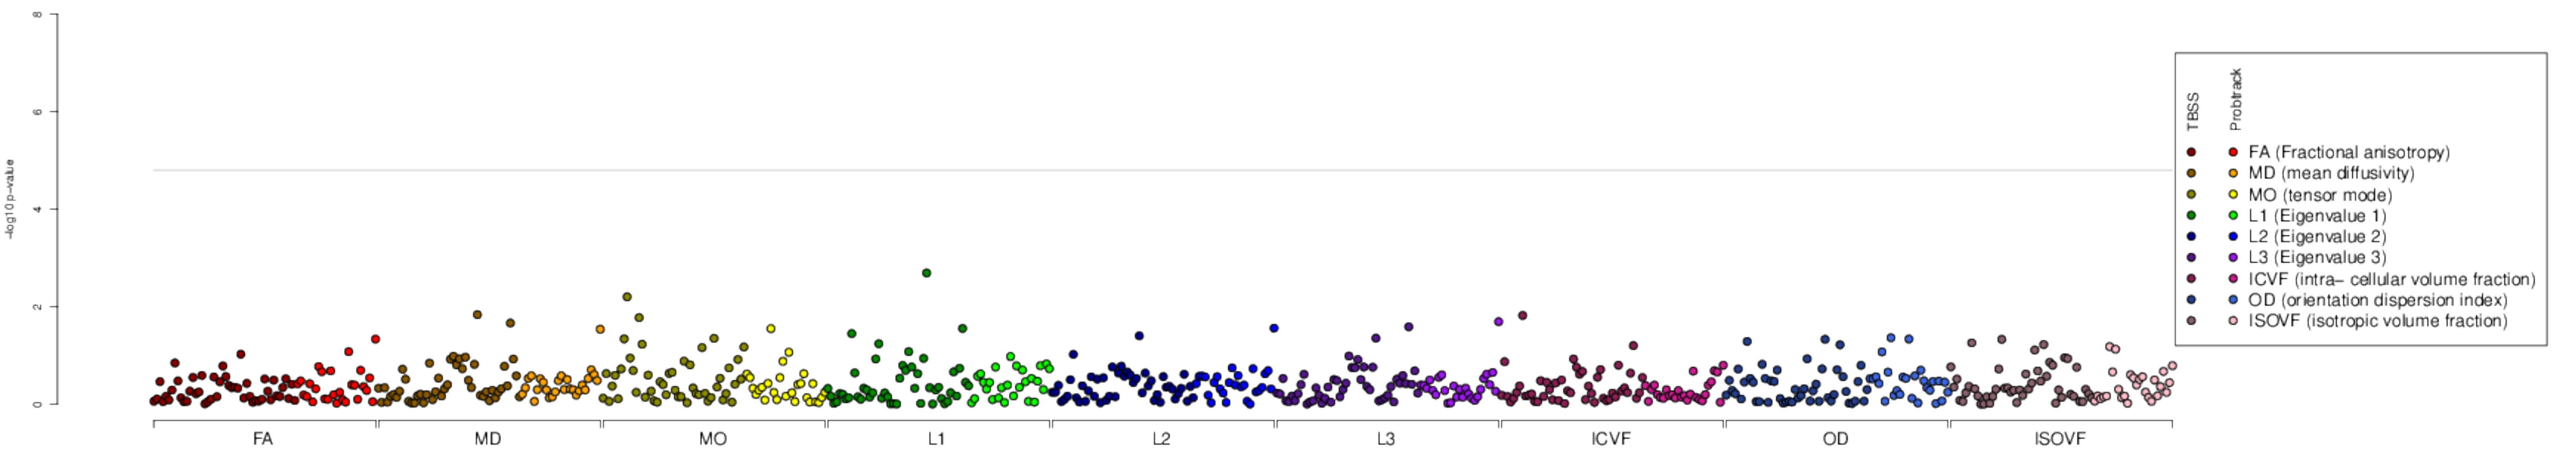

### functional MRI

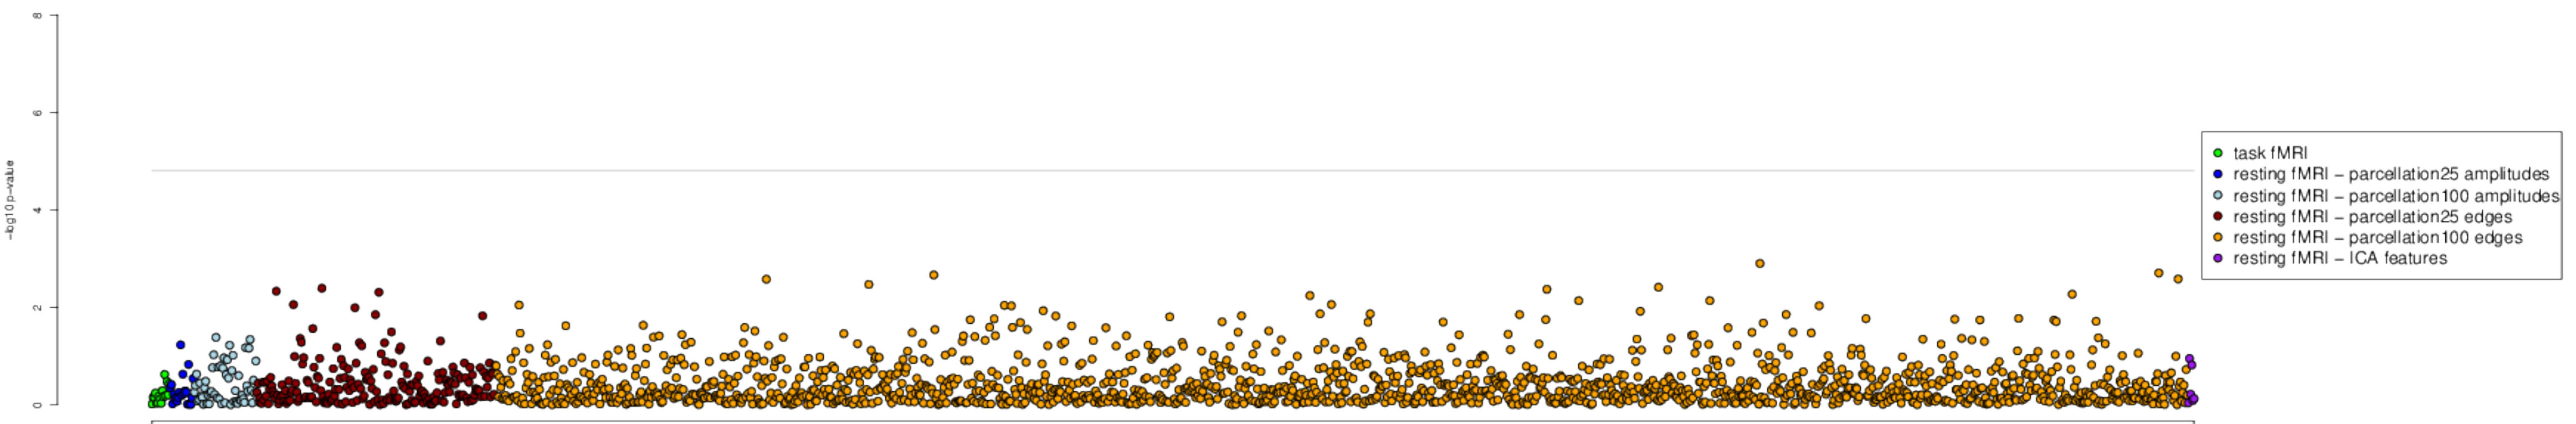

### Structural MRI

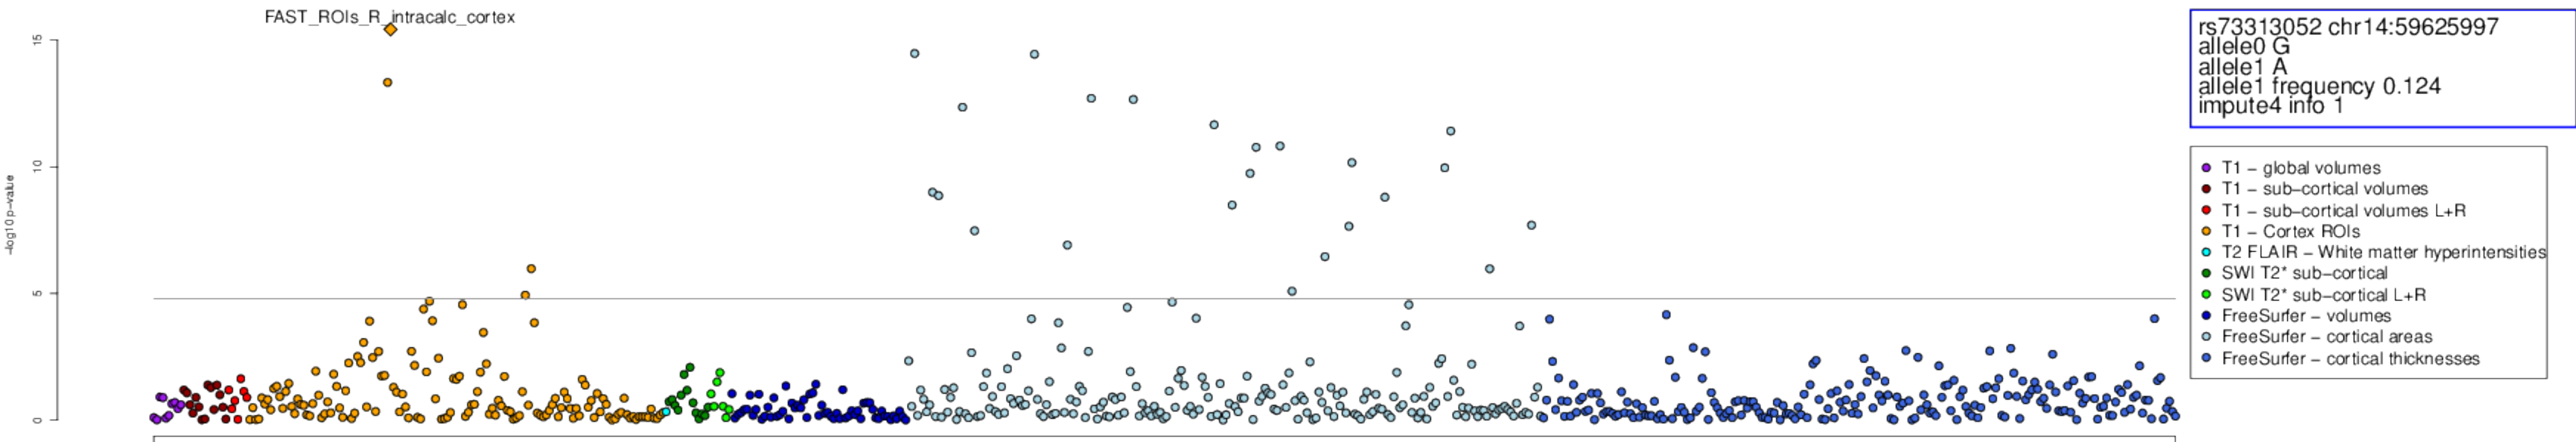

### Structural connectivity (Diffusion MRI)

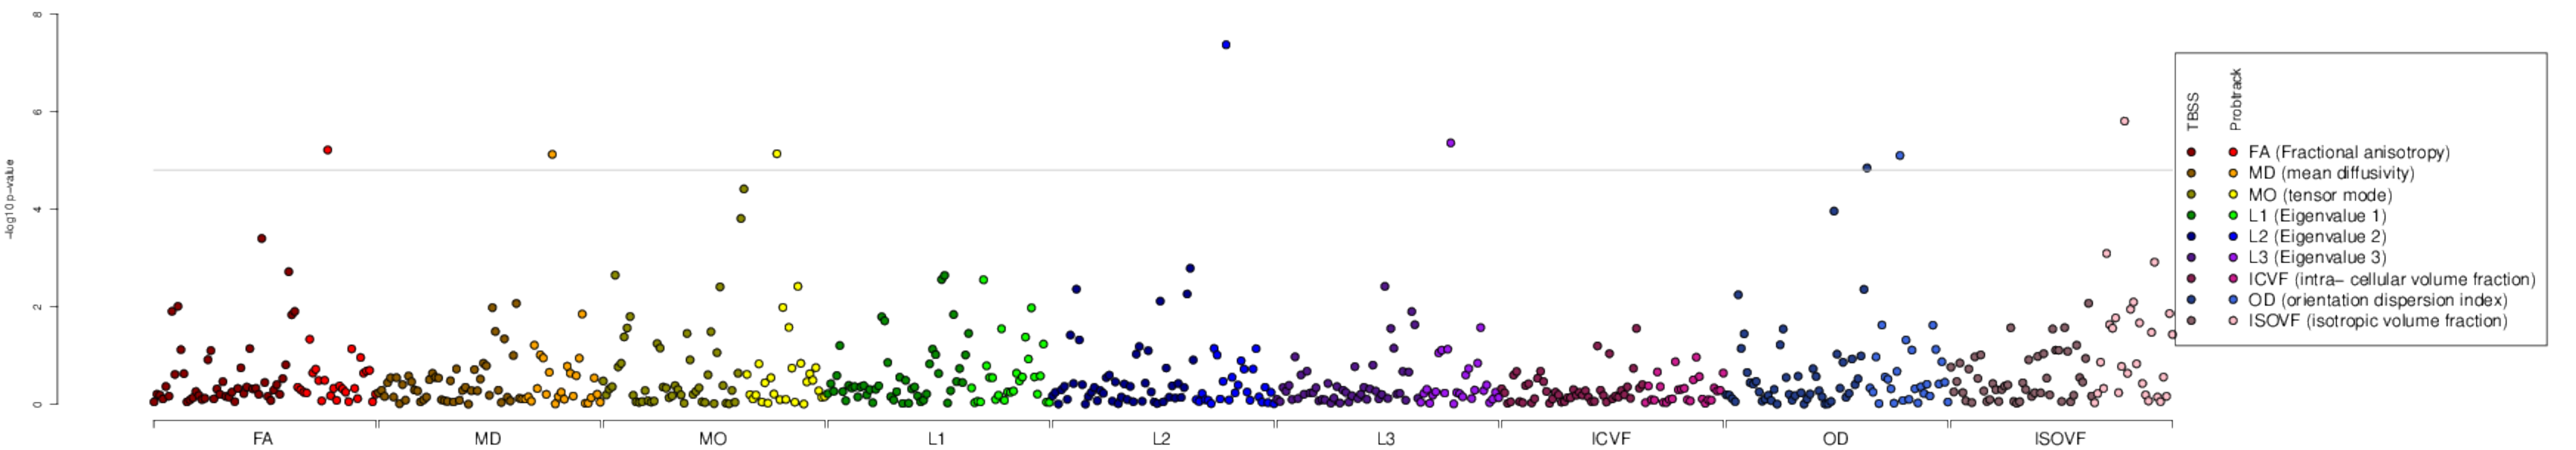

### functional MRI

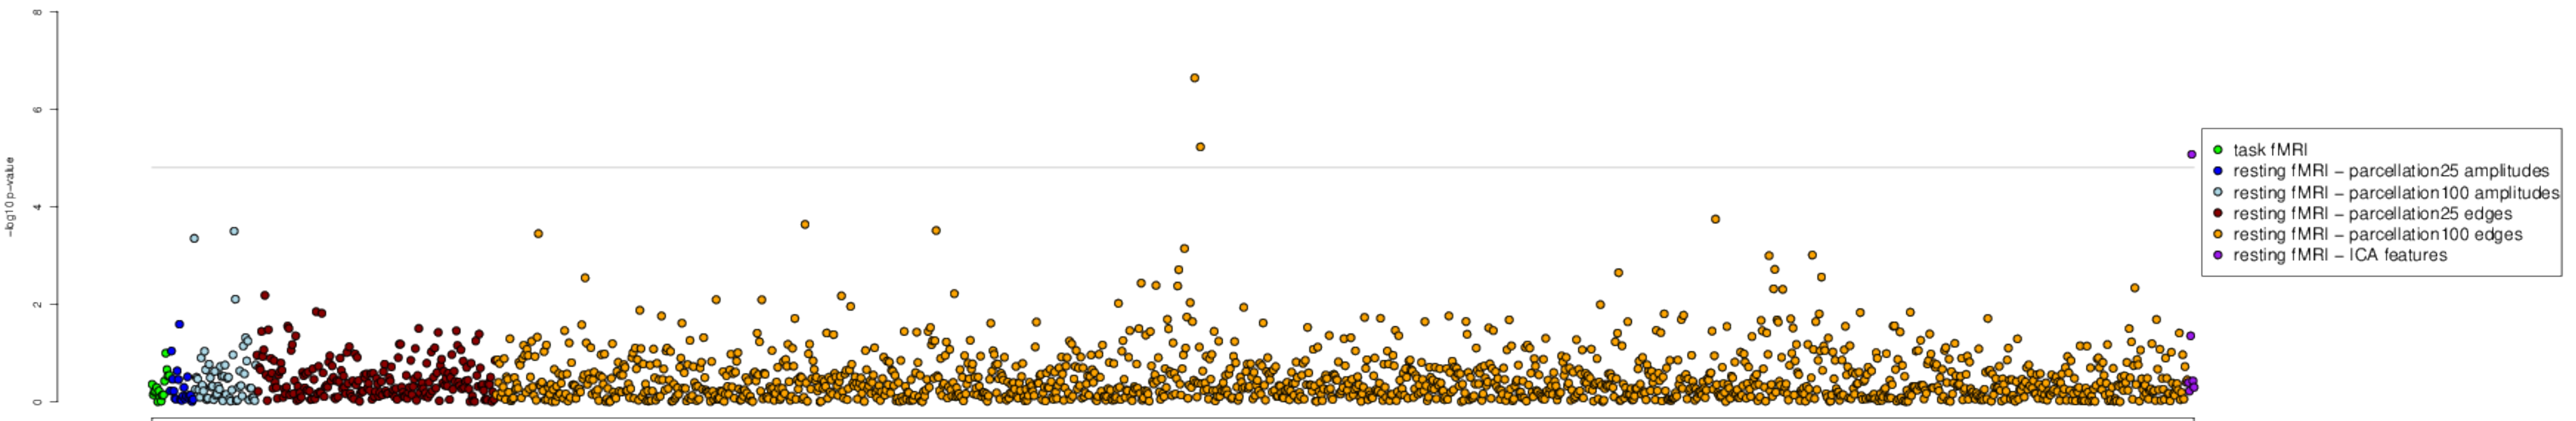

### Structural MRI

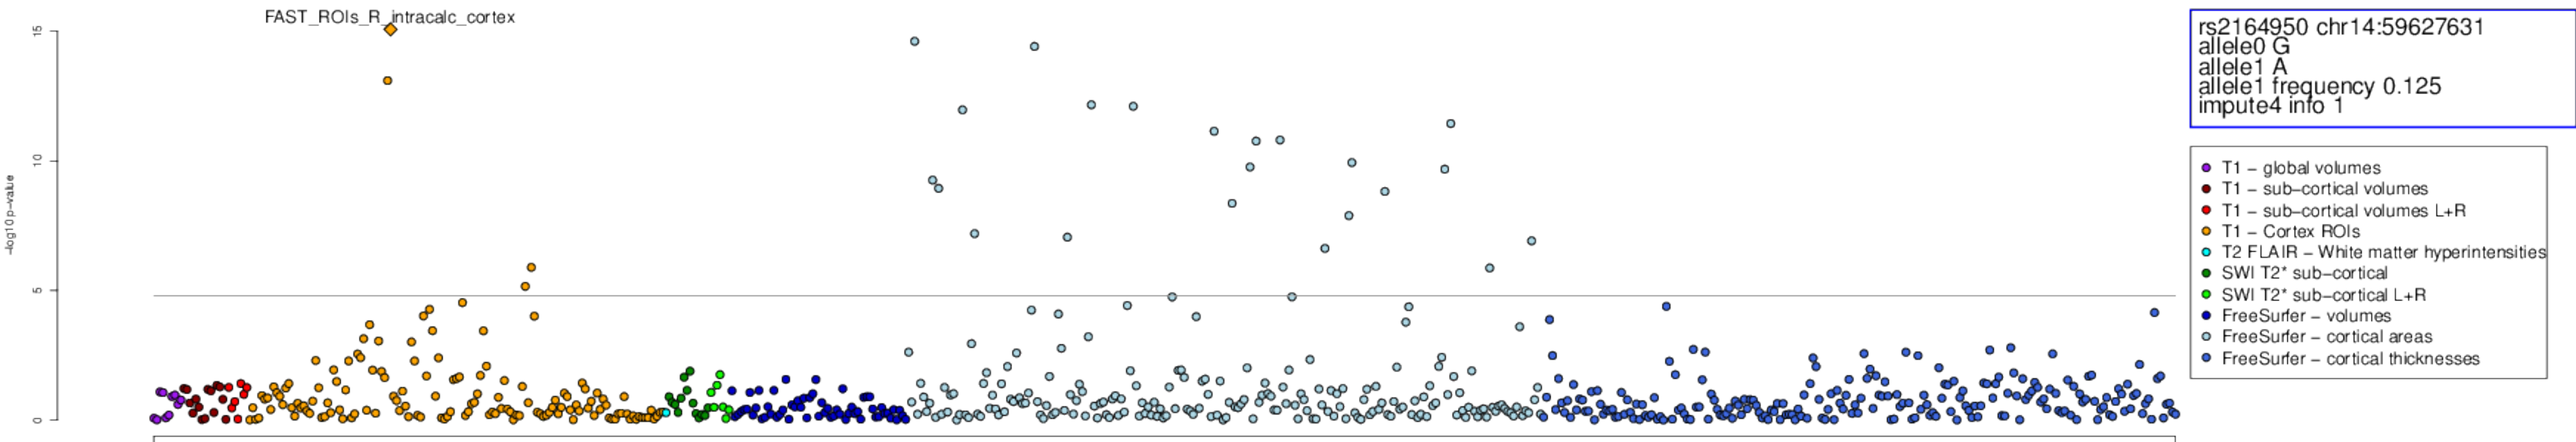

### Structural connectivity (Diffusion MRI)

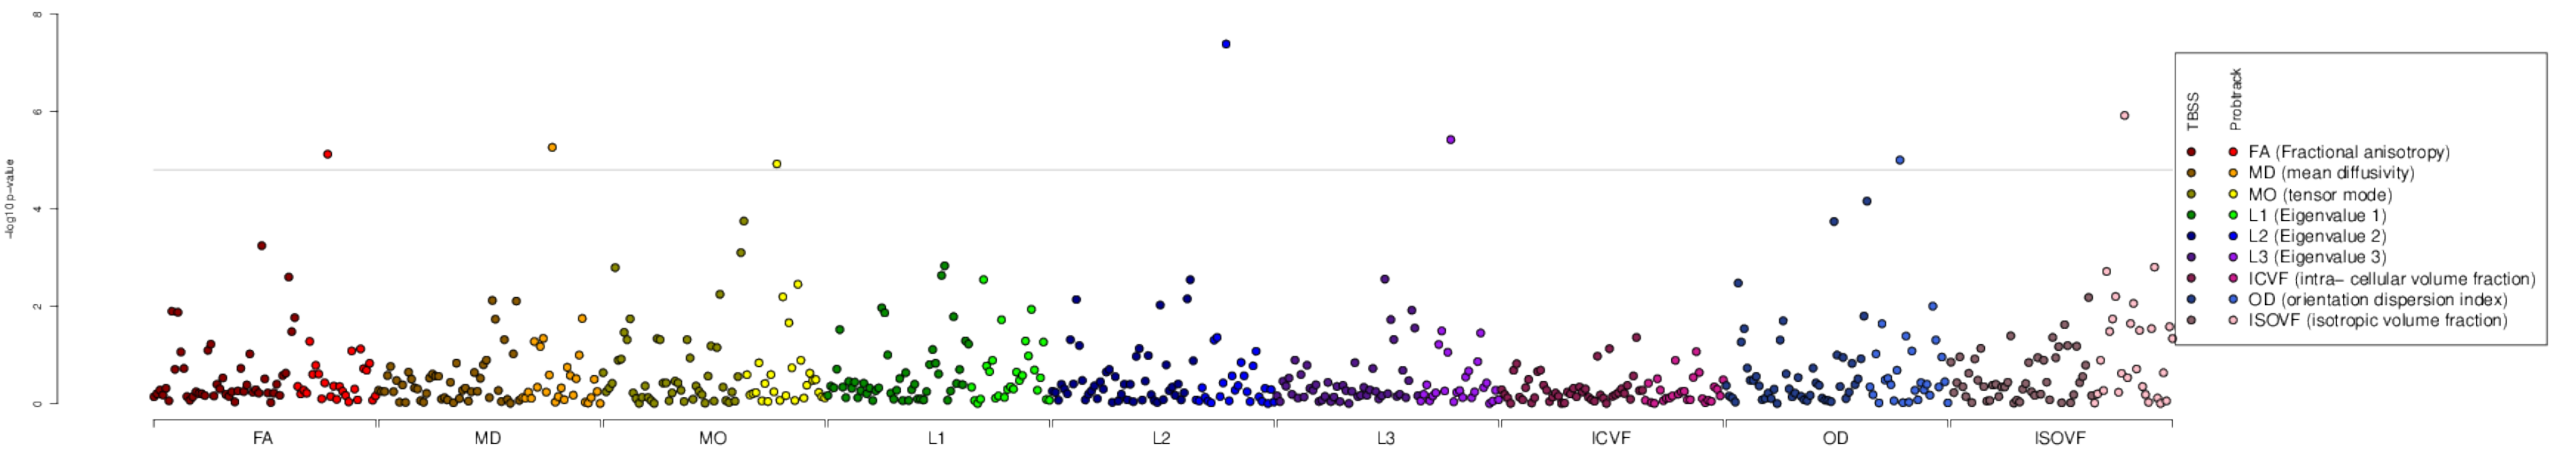

### functional MRI

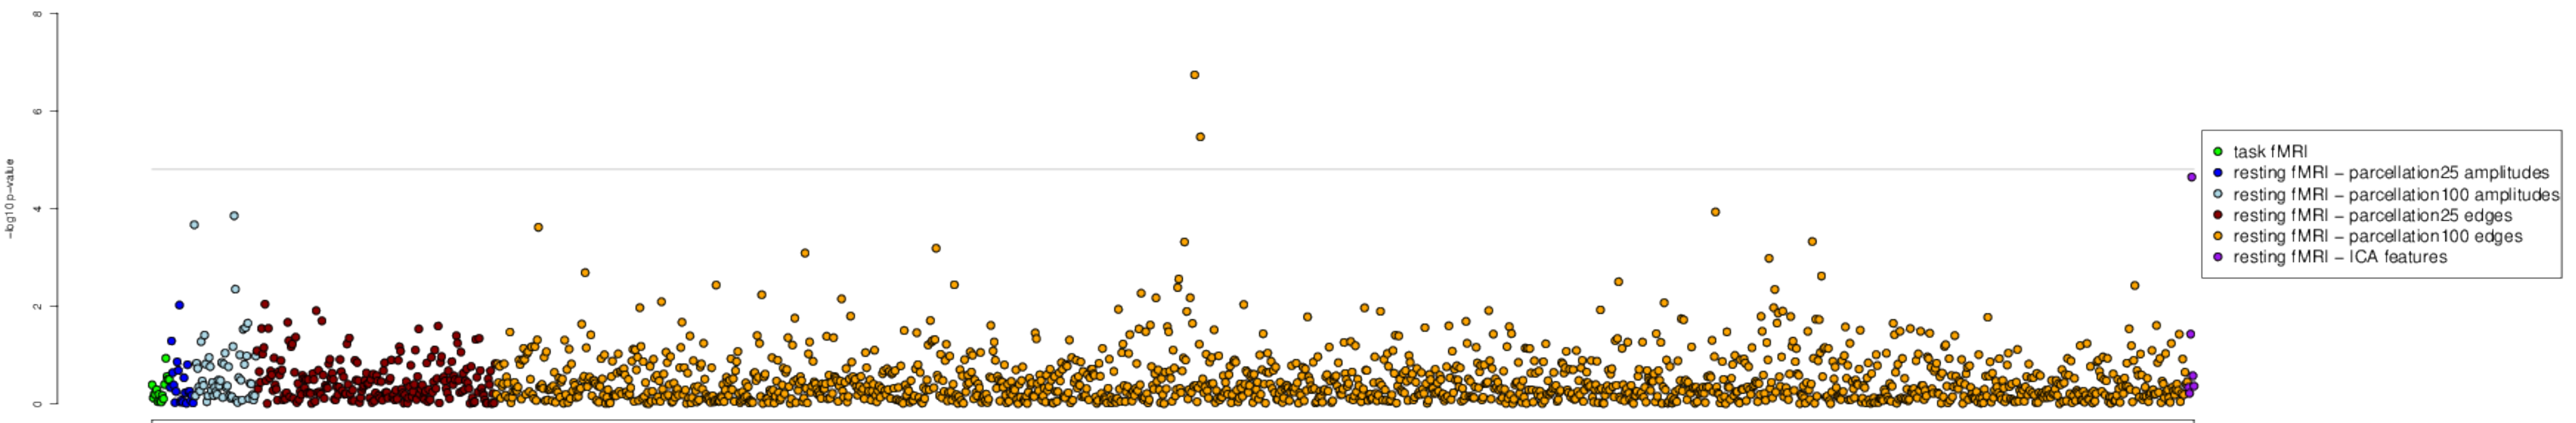

### Structural MRI

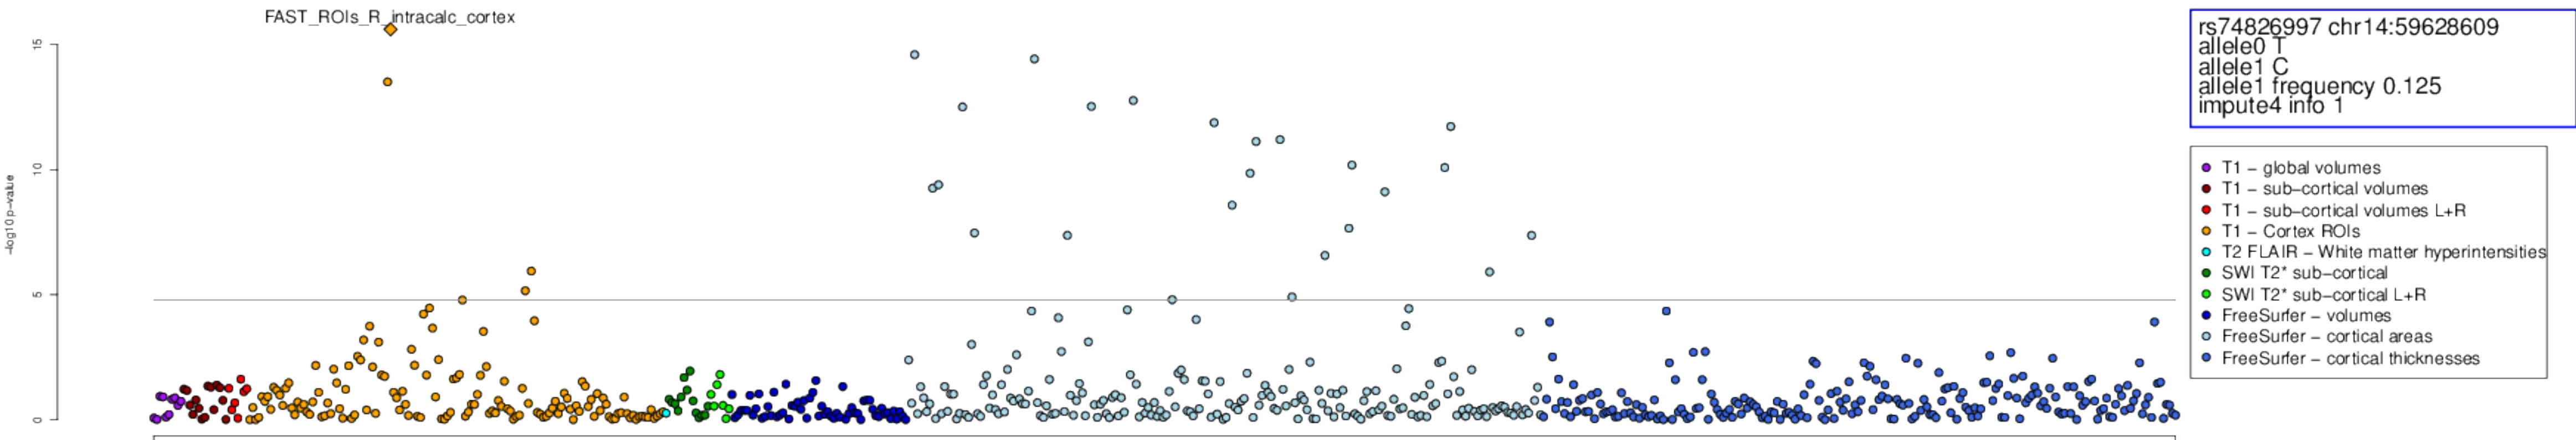

### Structural connectivity (Diffusion MRI)

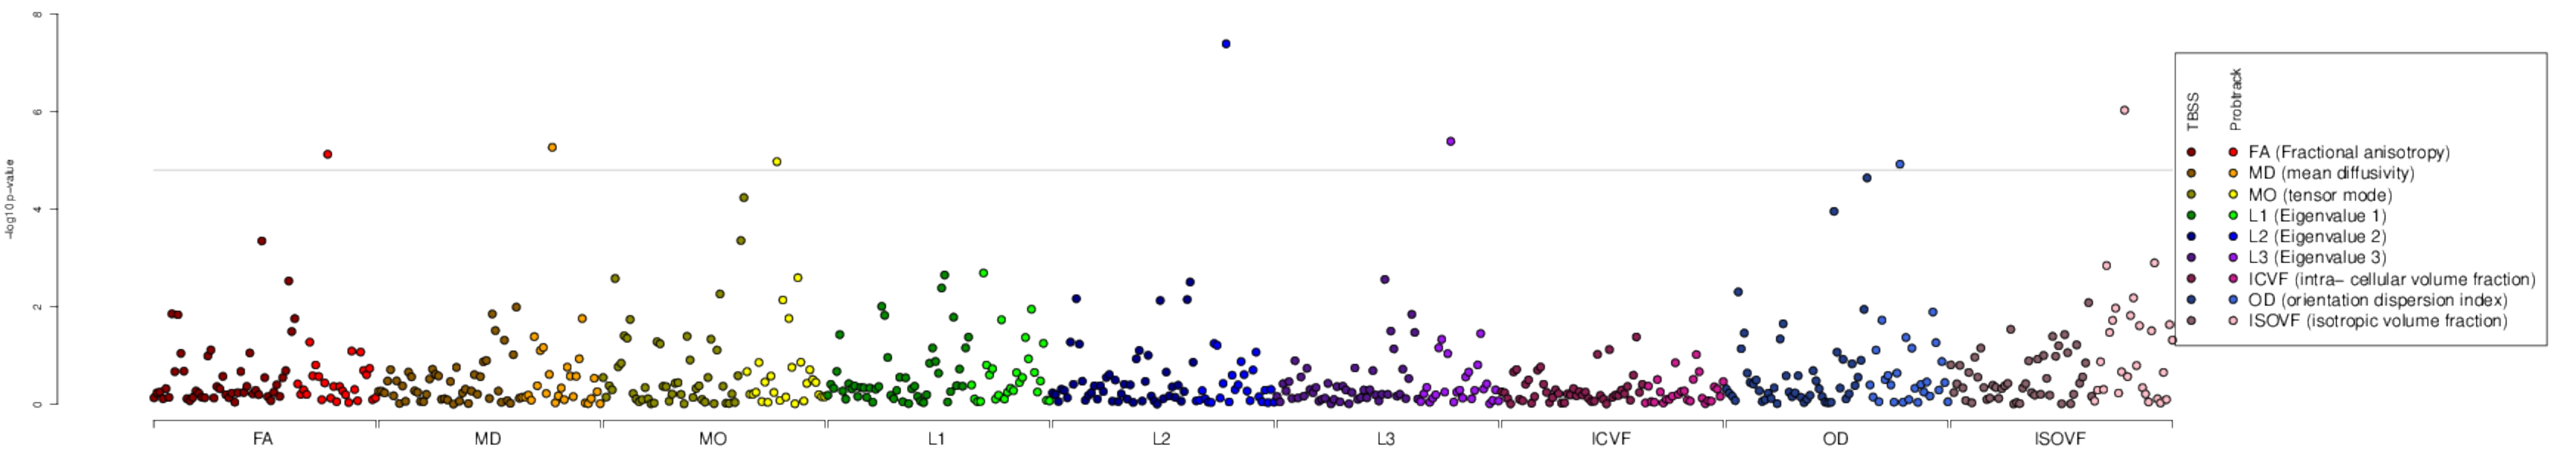

### functional MRI

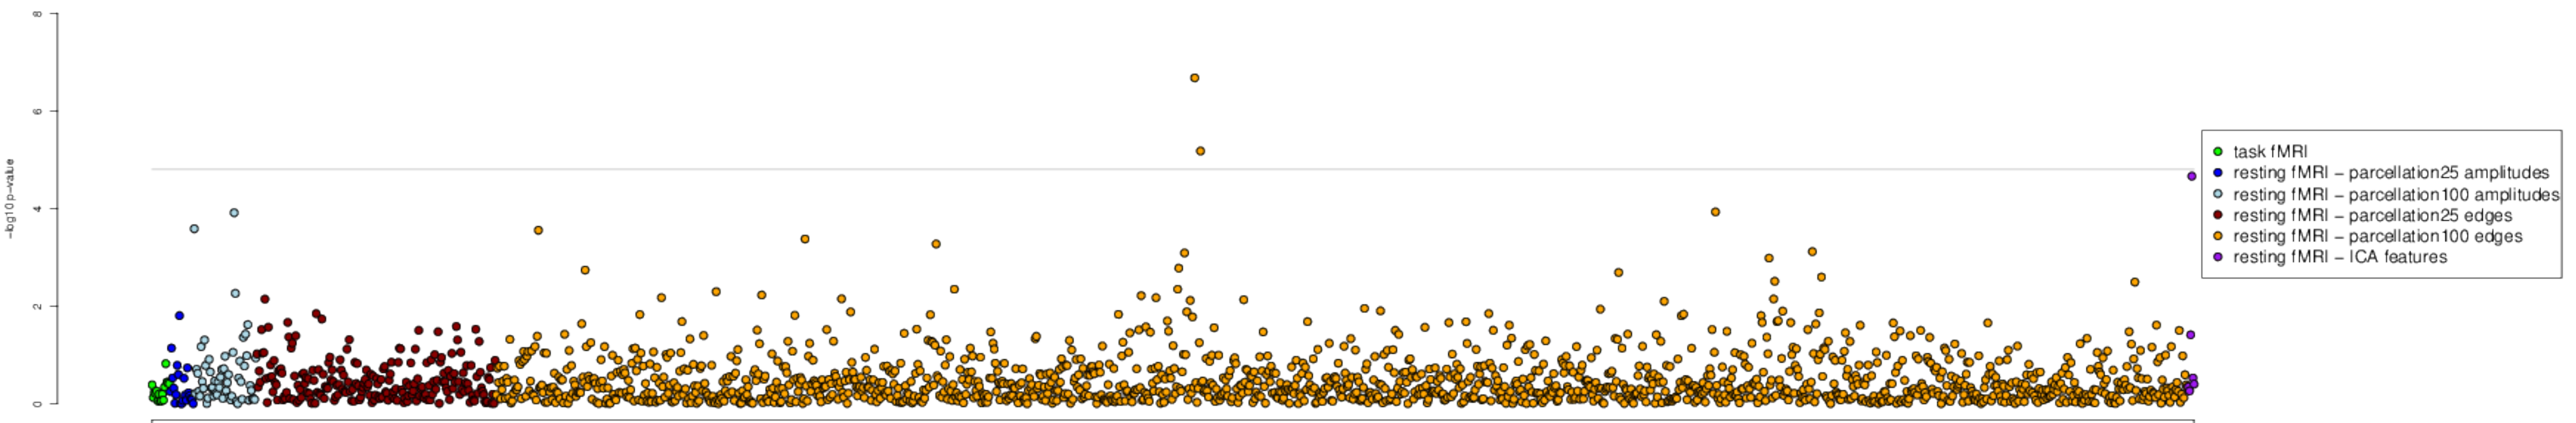



### Structural MRI

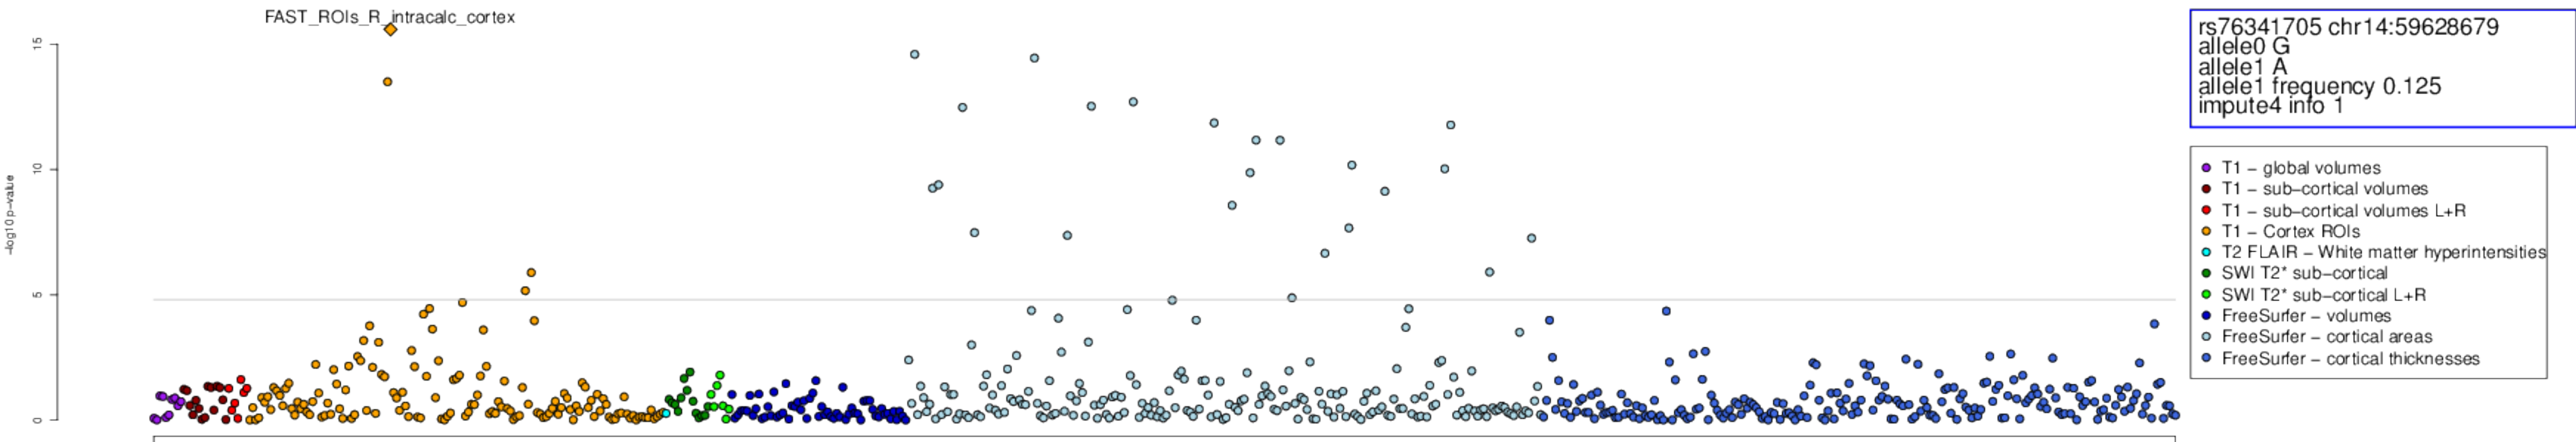

### Structural connectivity (Diffusion MRI)

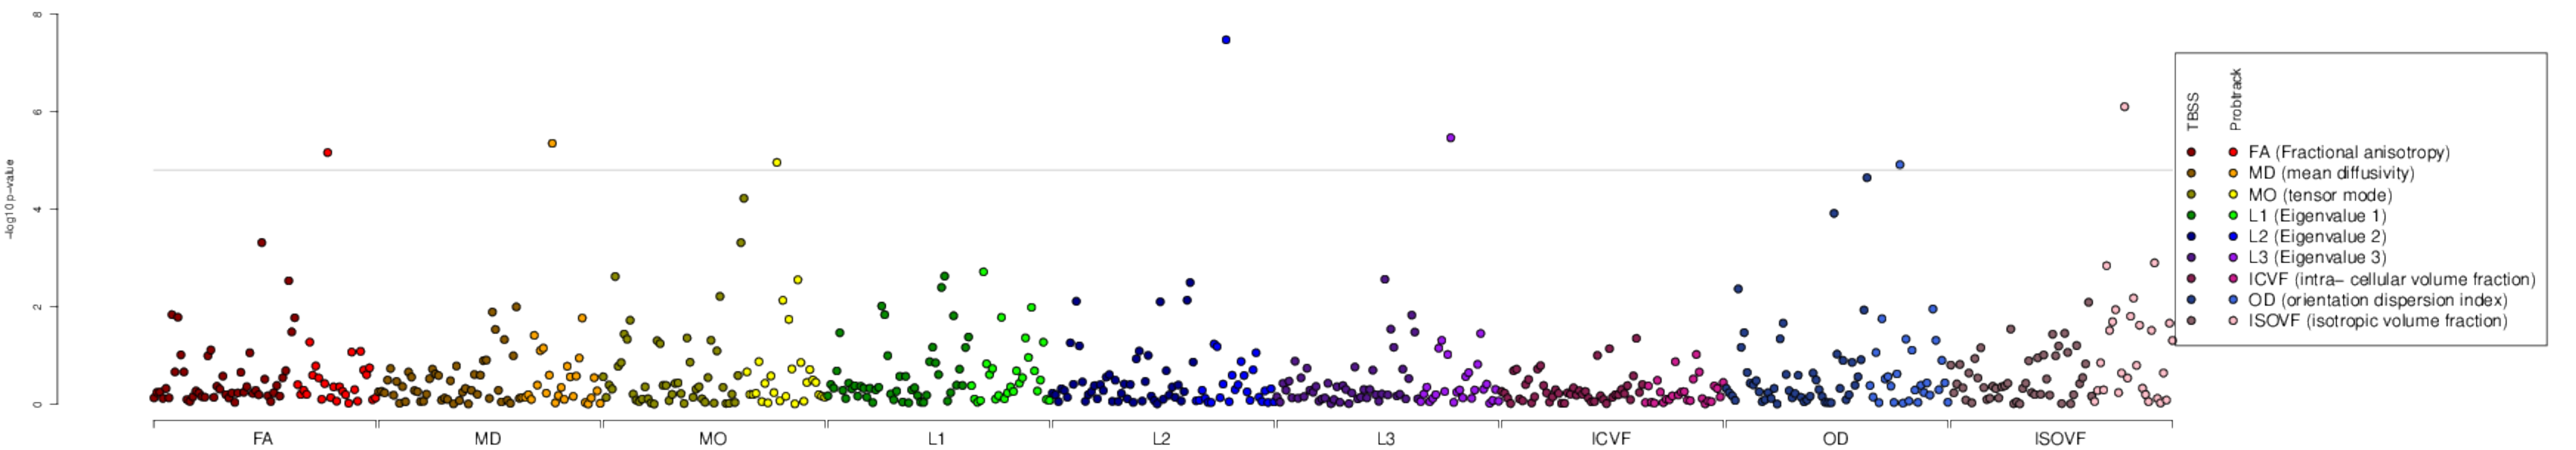

### functional MRI

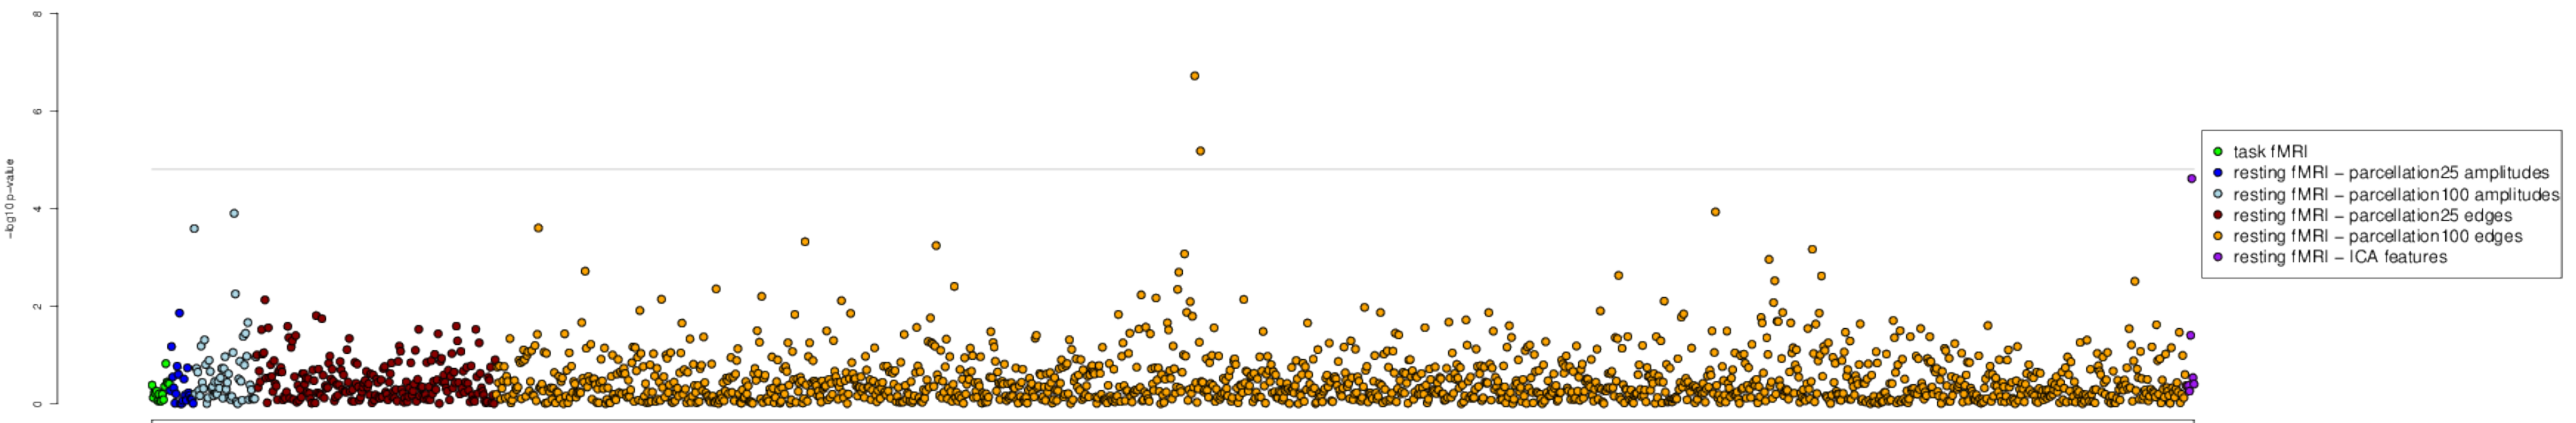

### Structural MRI

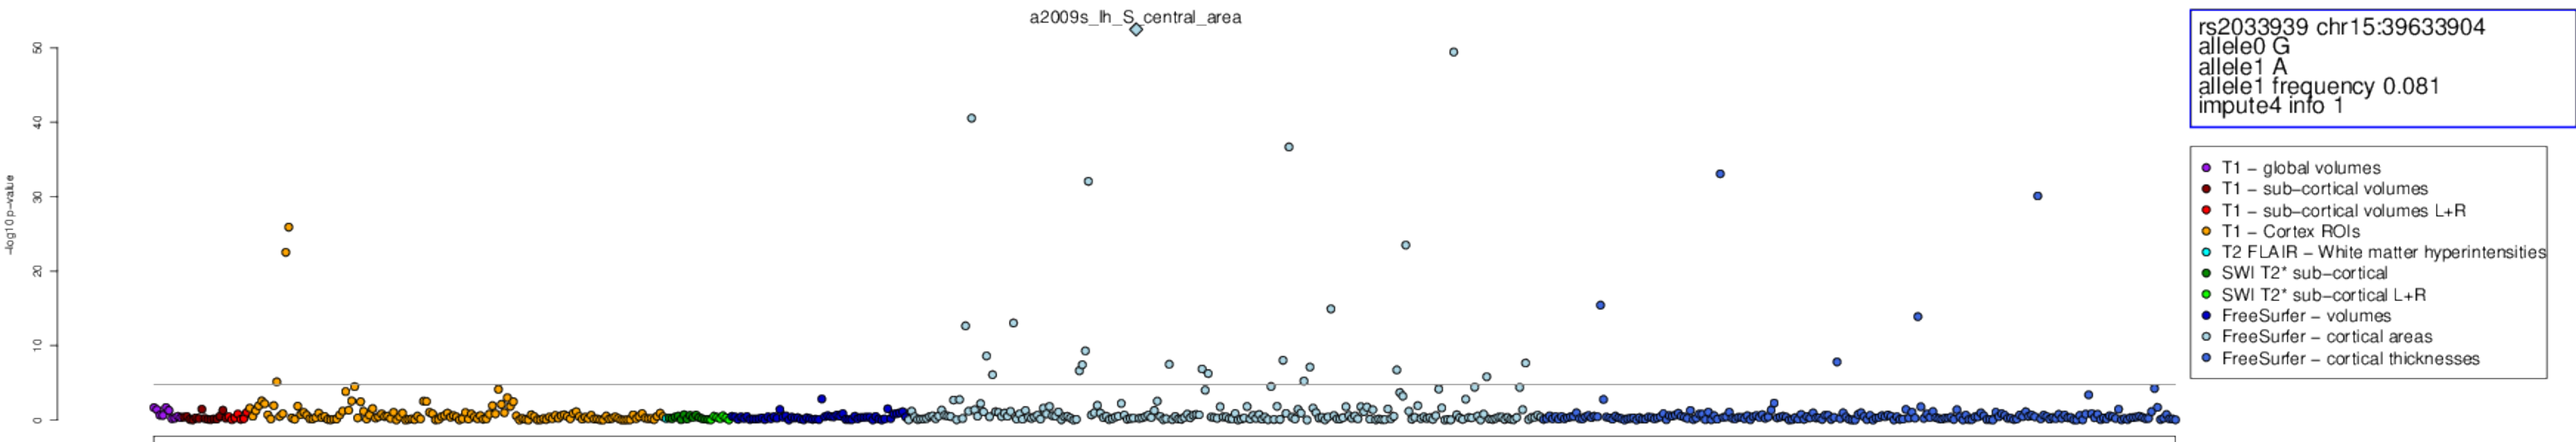

### Structural connectivity (Diffusion MRI)

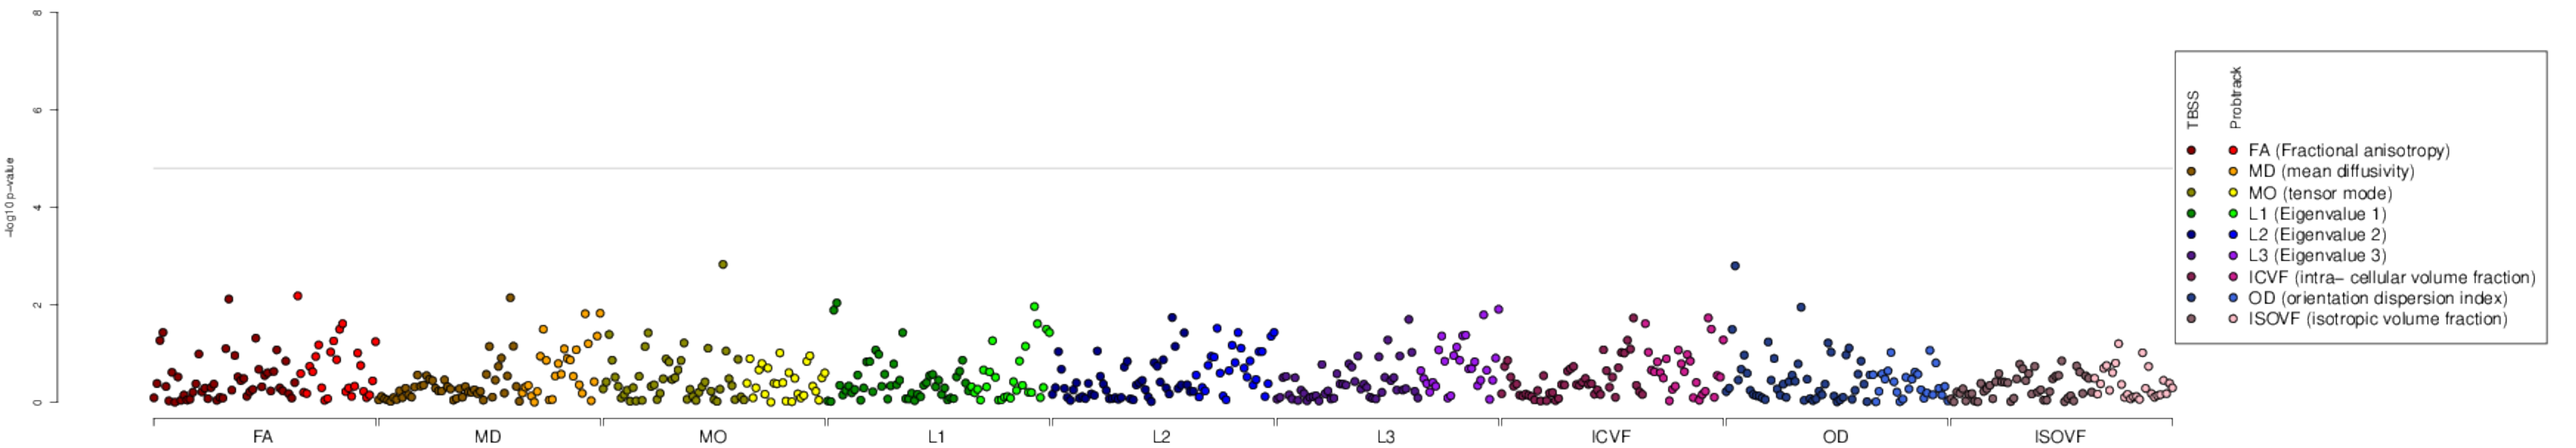

### functional MRI

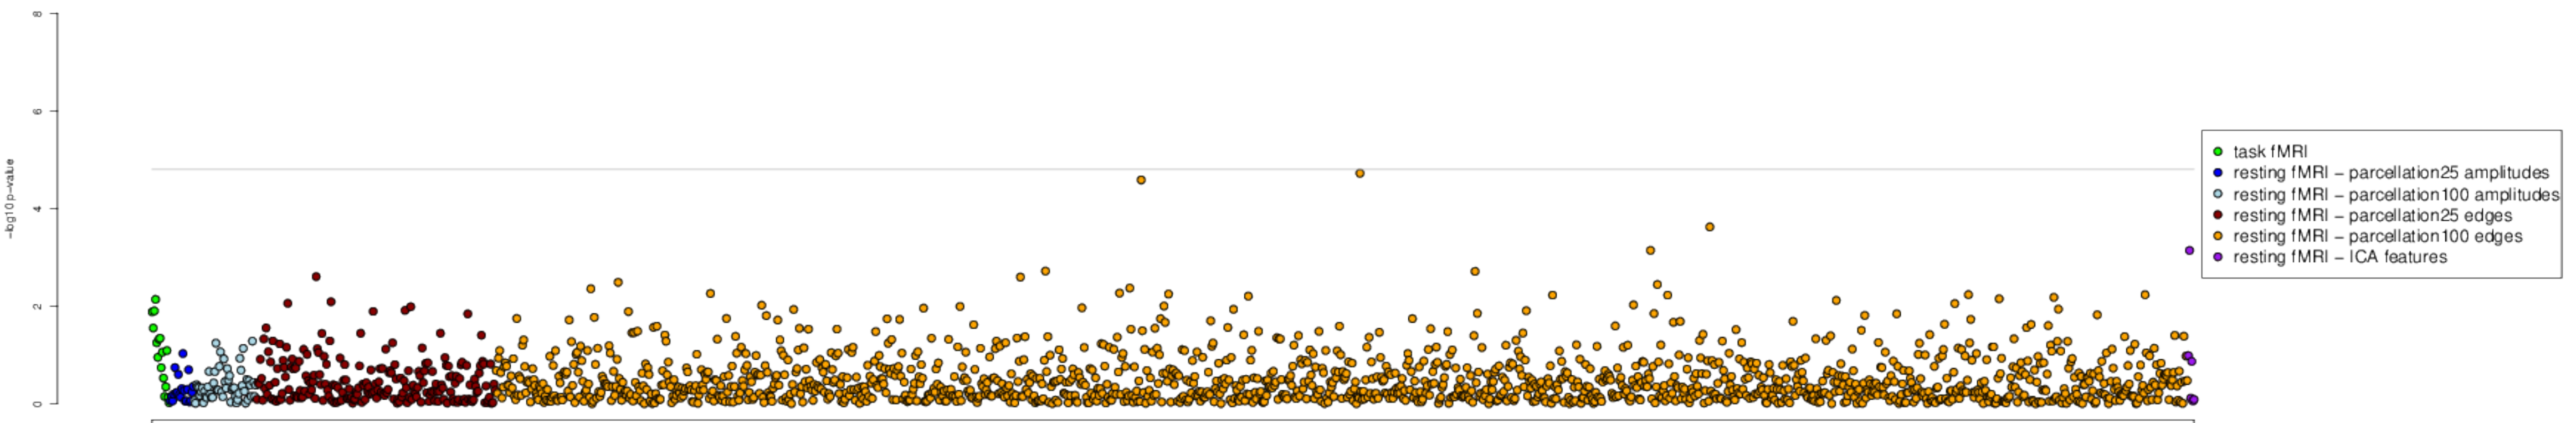

### Structural MRI

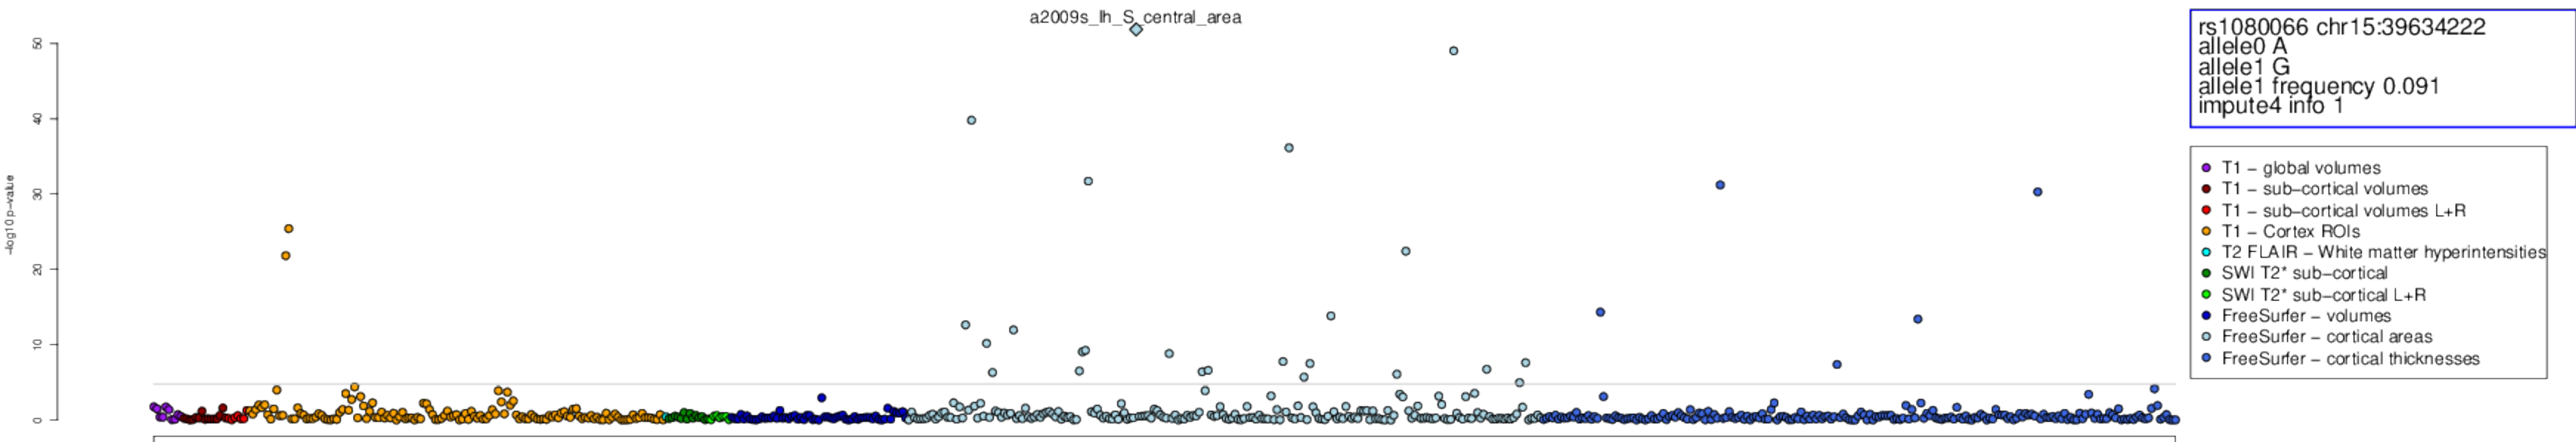

### Structural connectivity (Diffusion MRI)

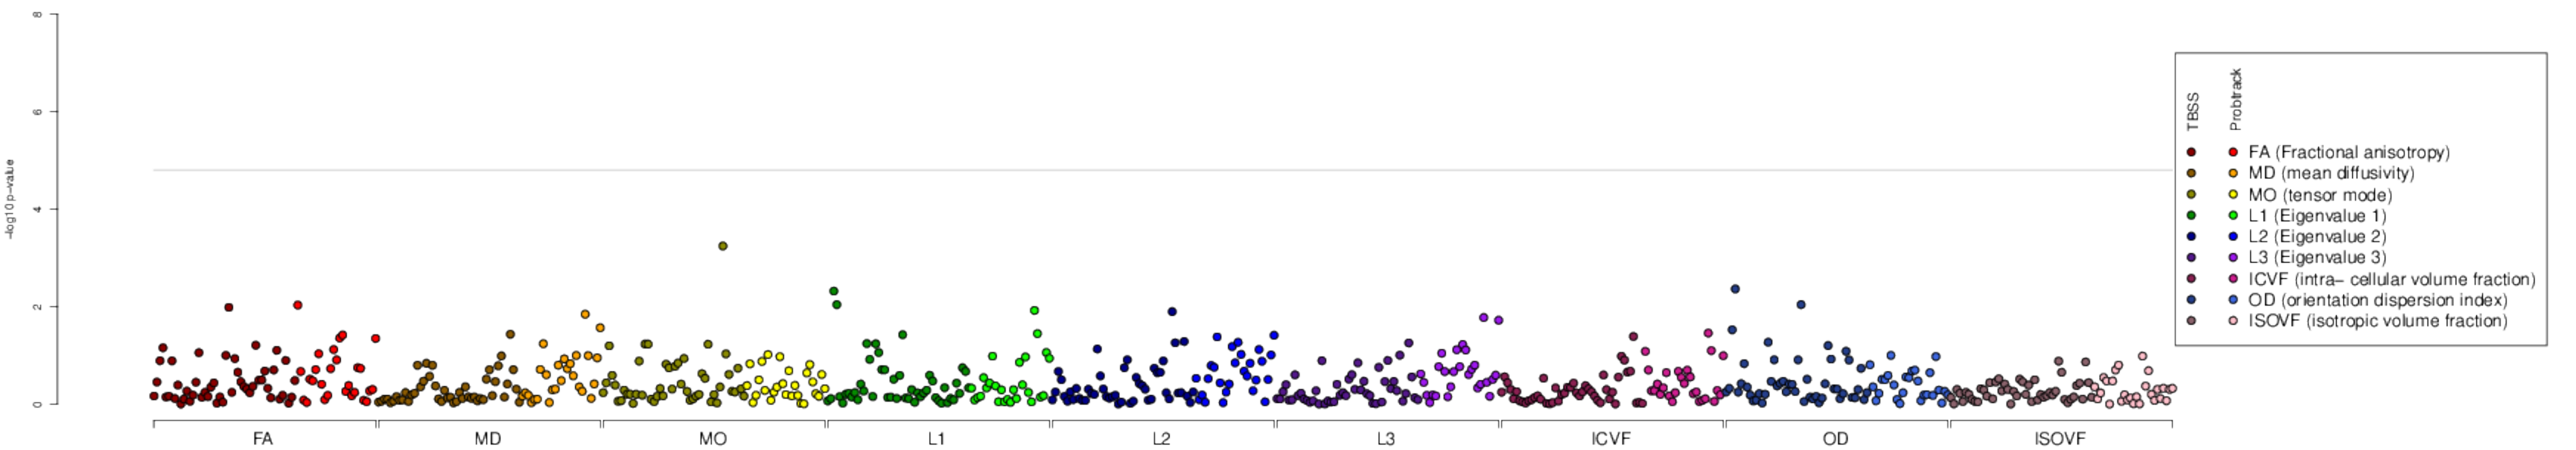

### functional MRI

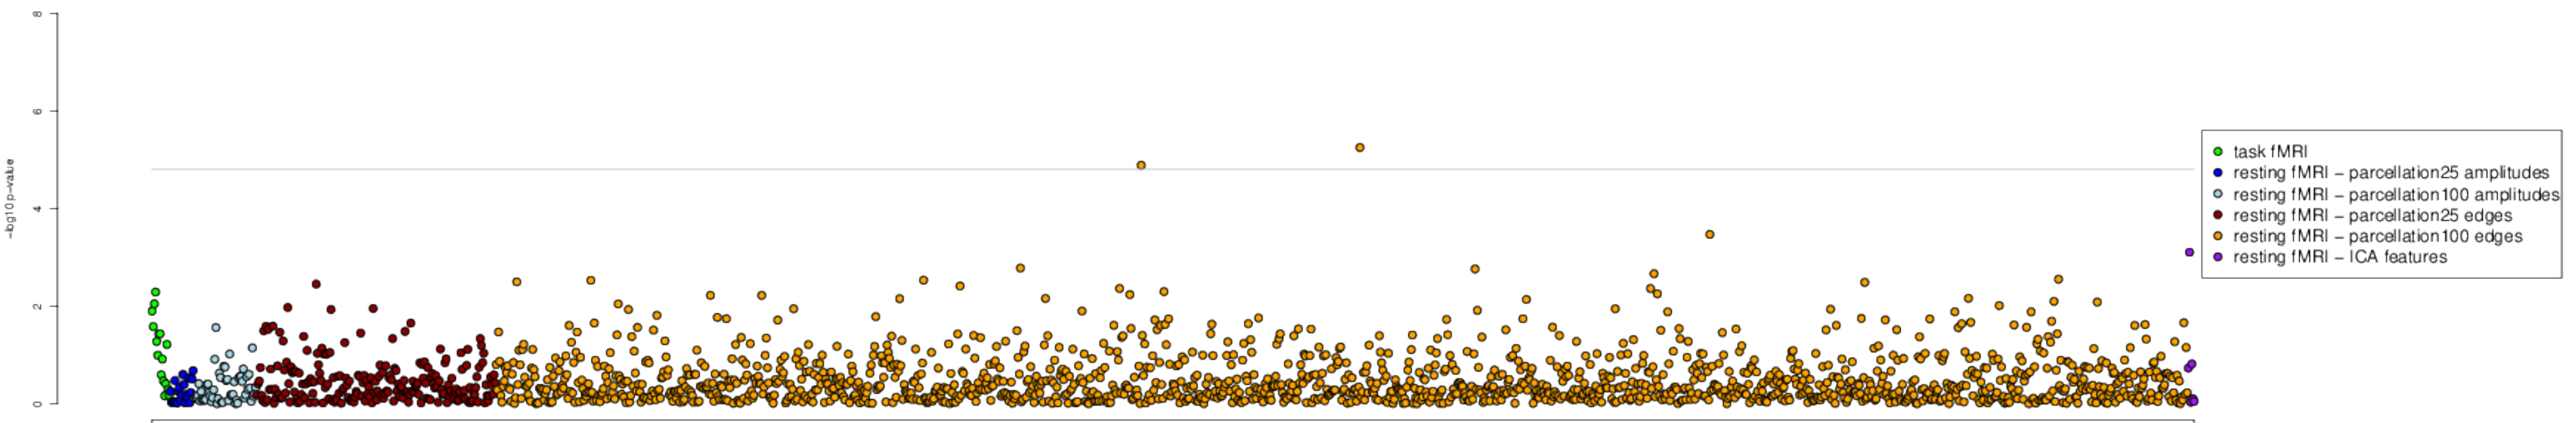

### Structural MRI

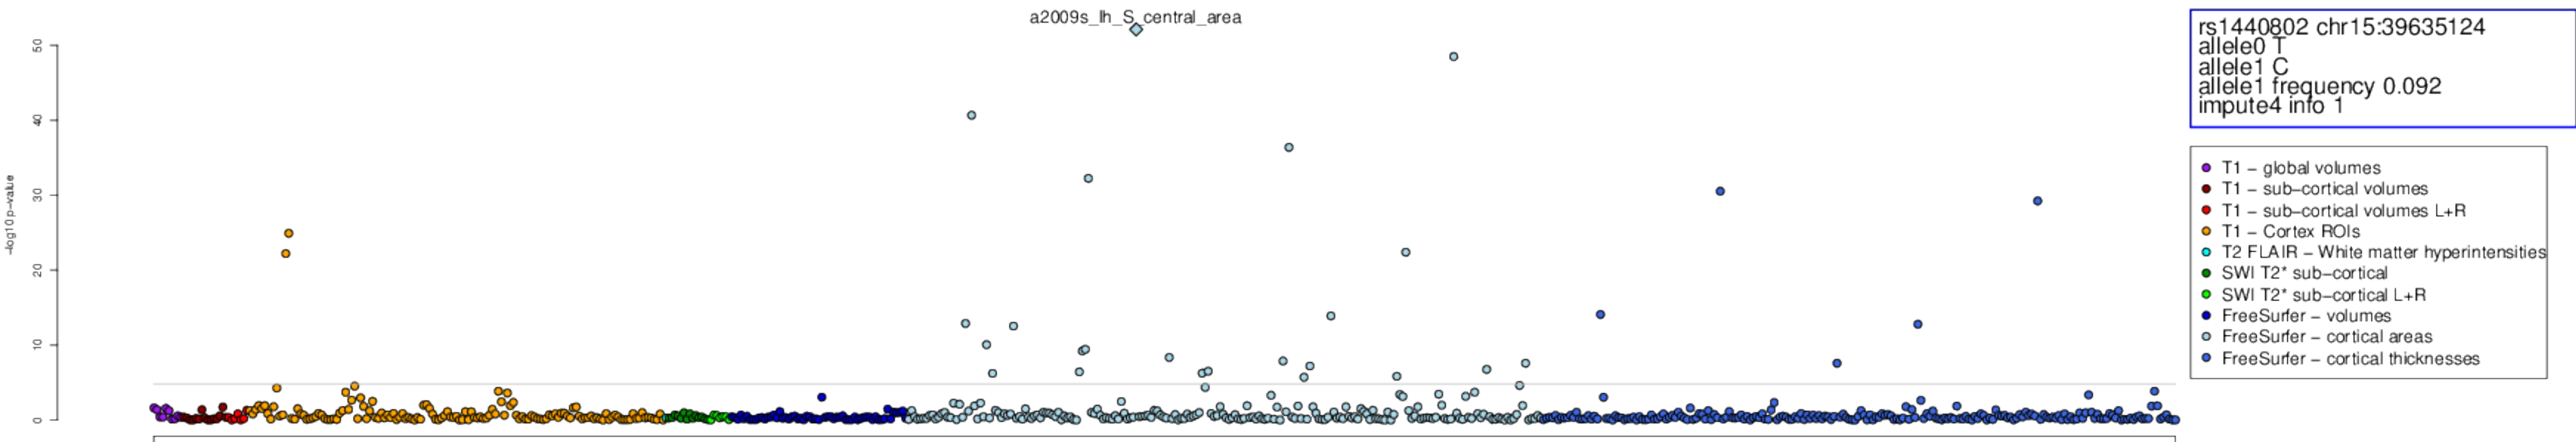

### Structural connectivity (Diffusion MRI)

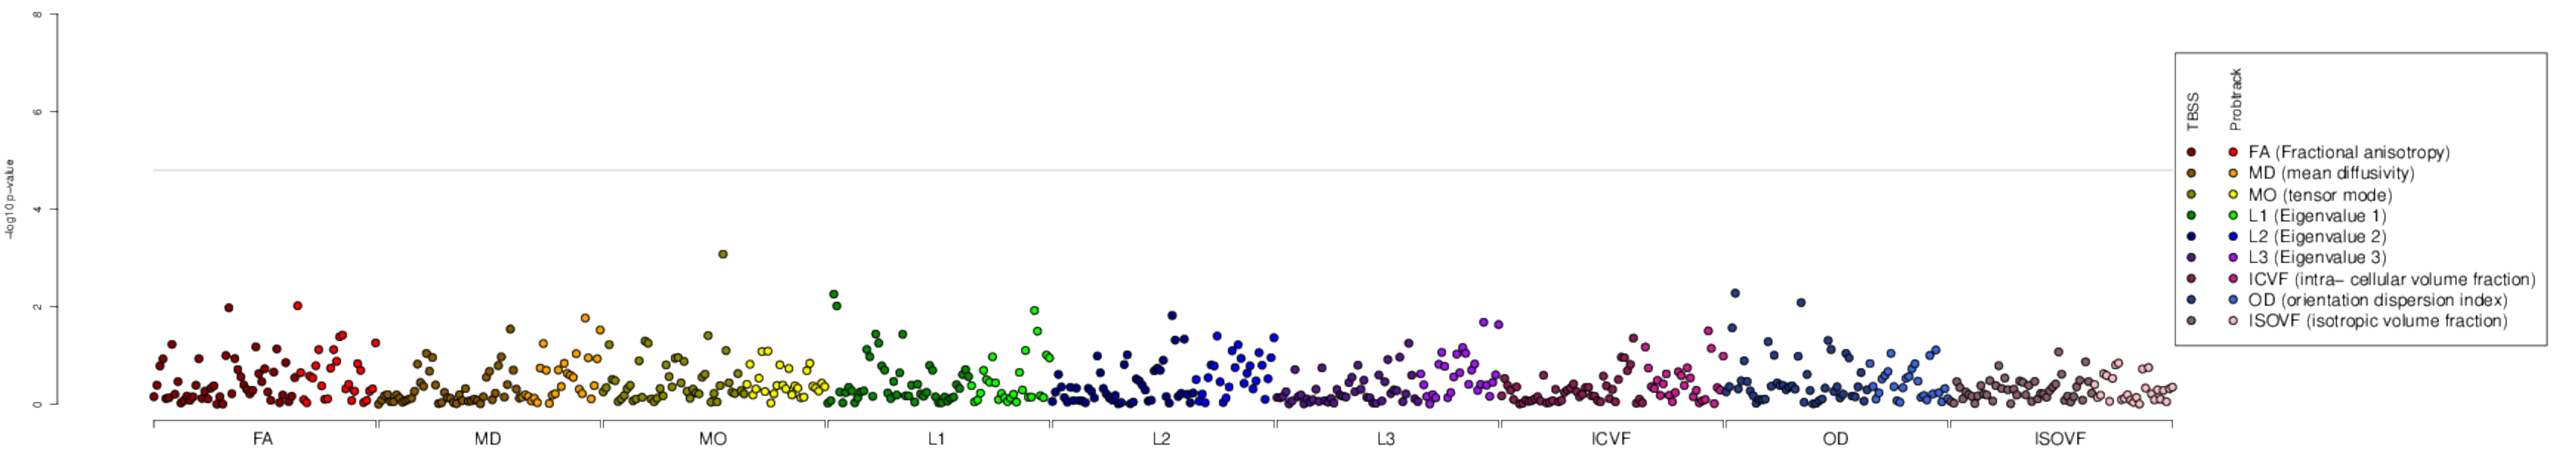

### functional MRI

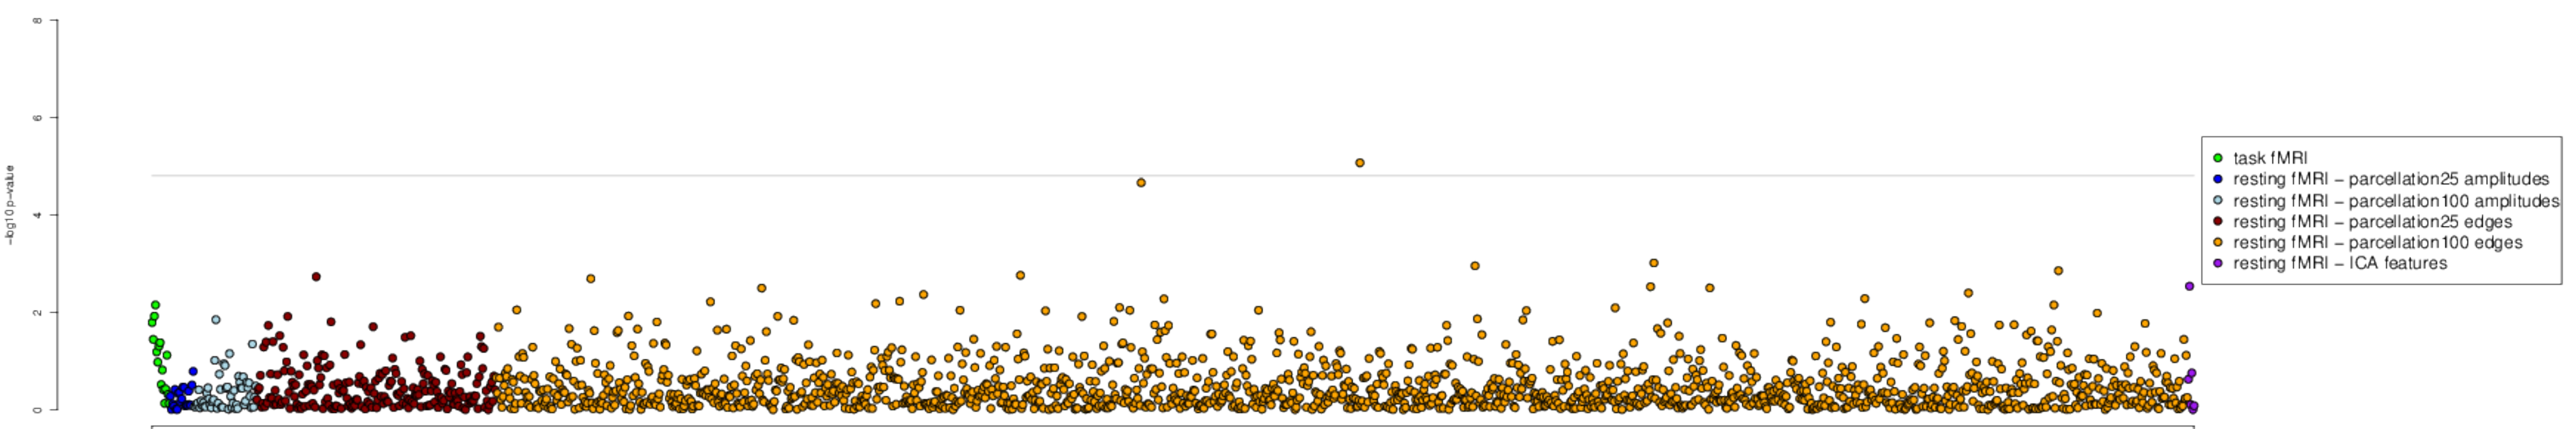

### Structural MRI

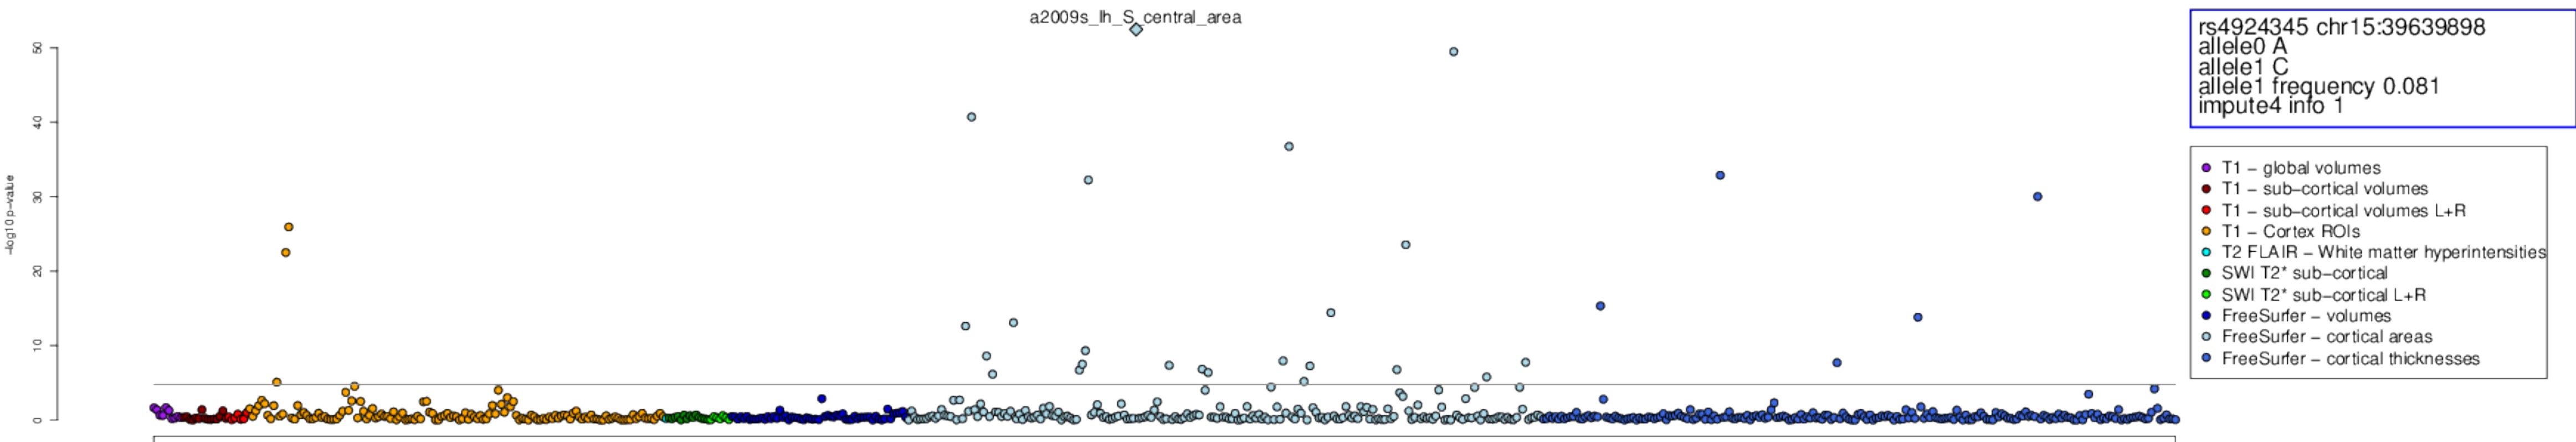

### Structural connectivity (Diffusion MRI)

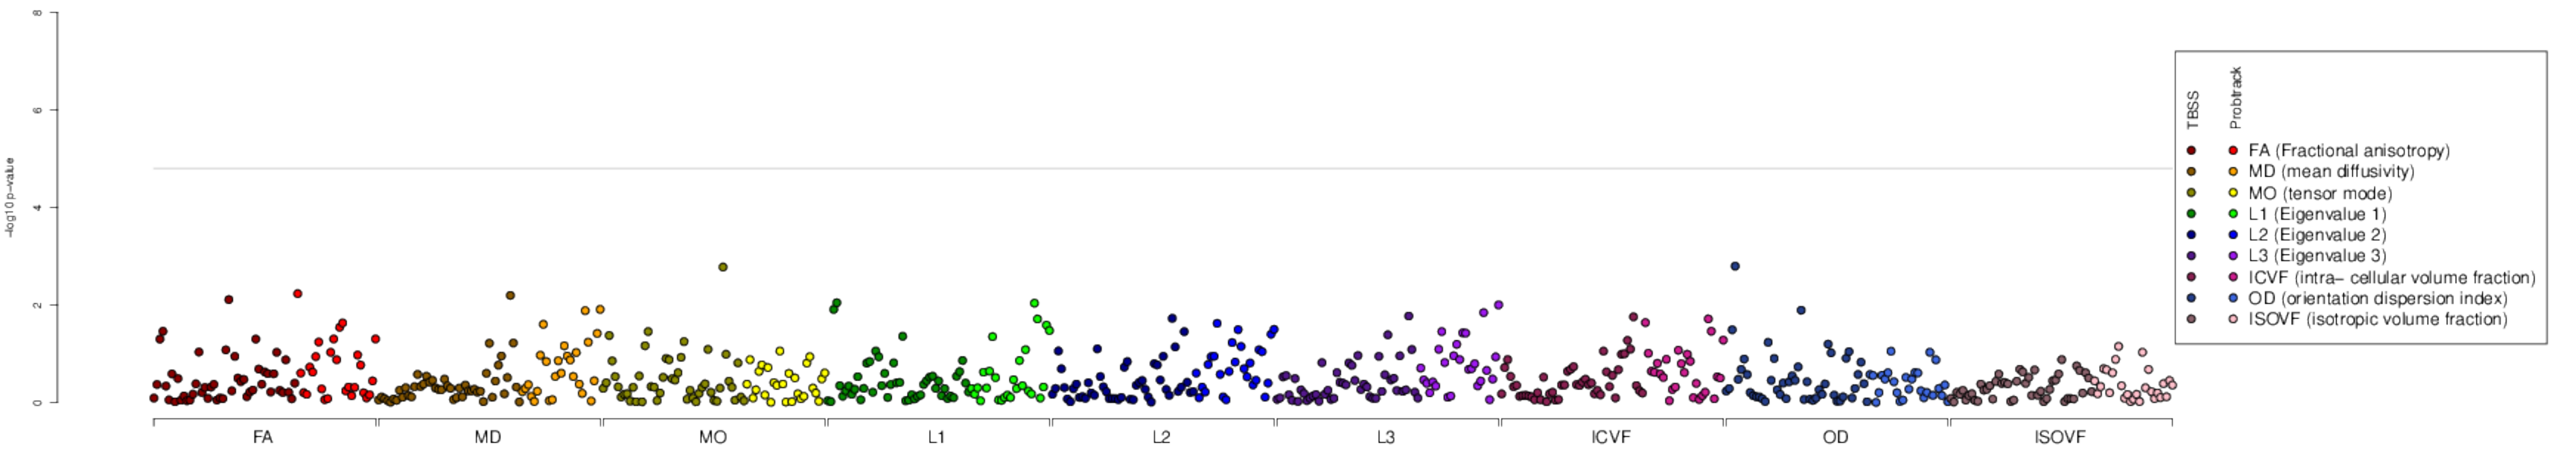

### functional MRI

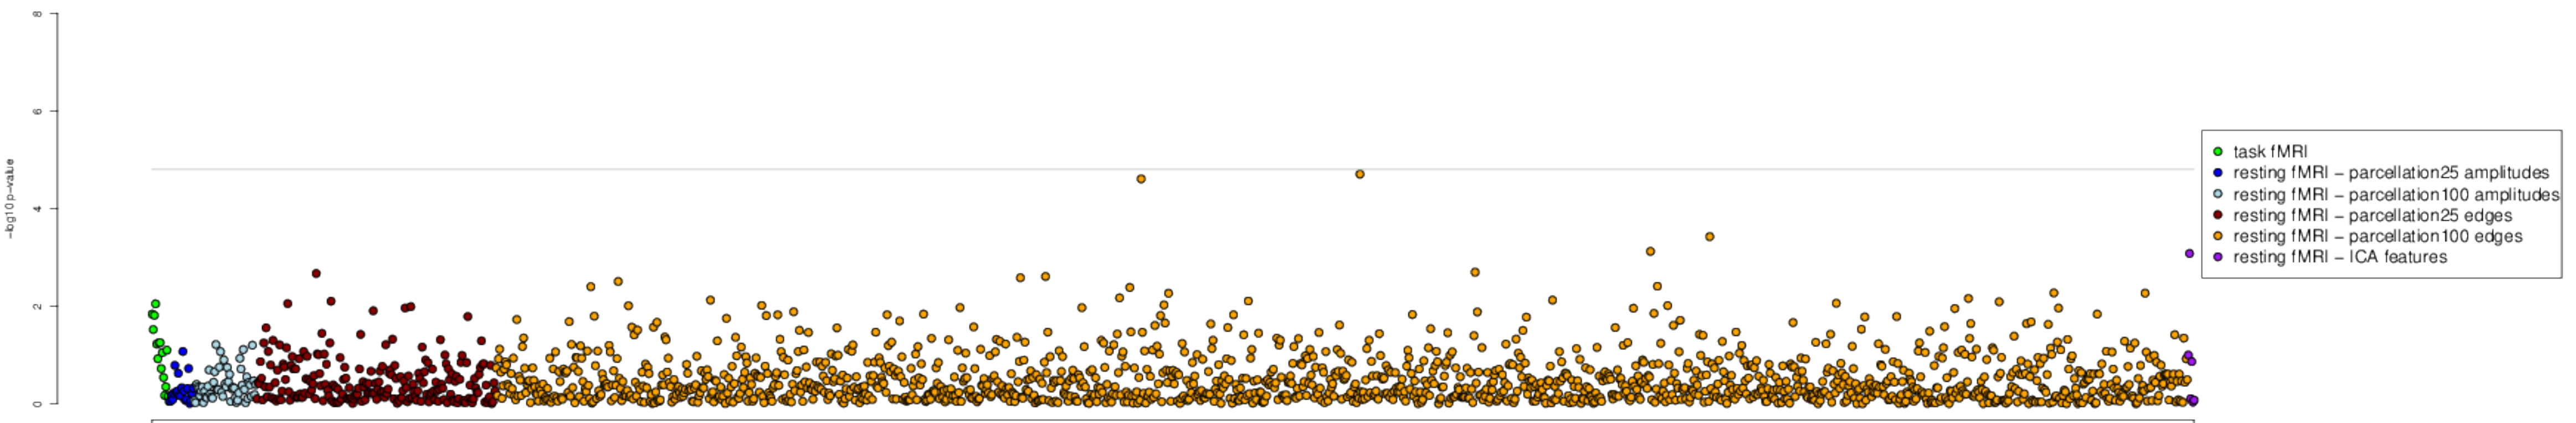

### Structural MRI

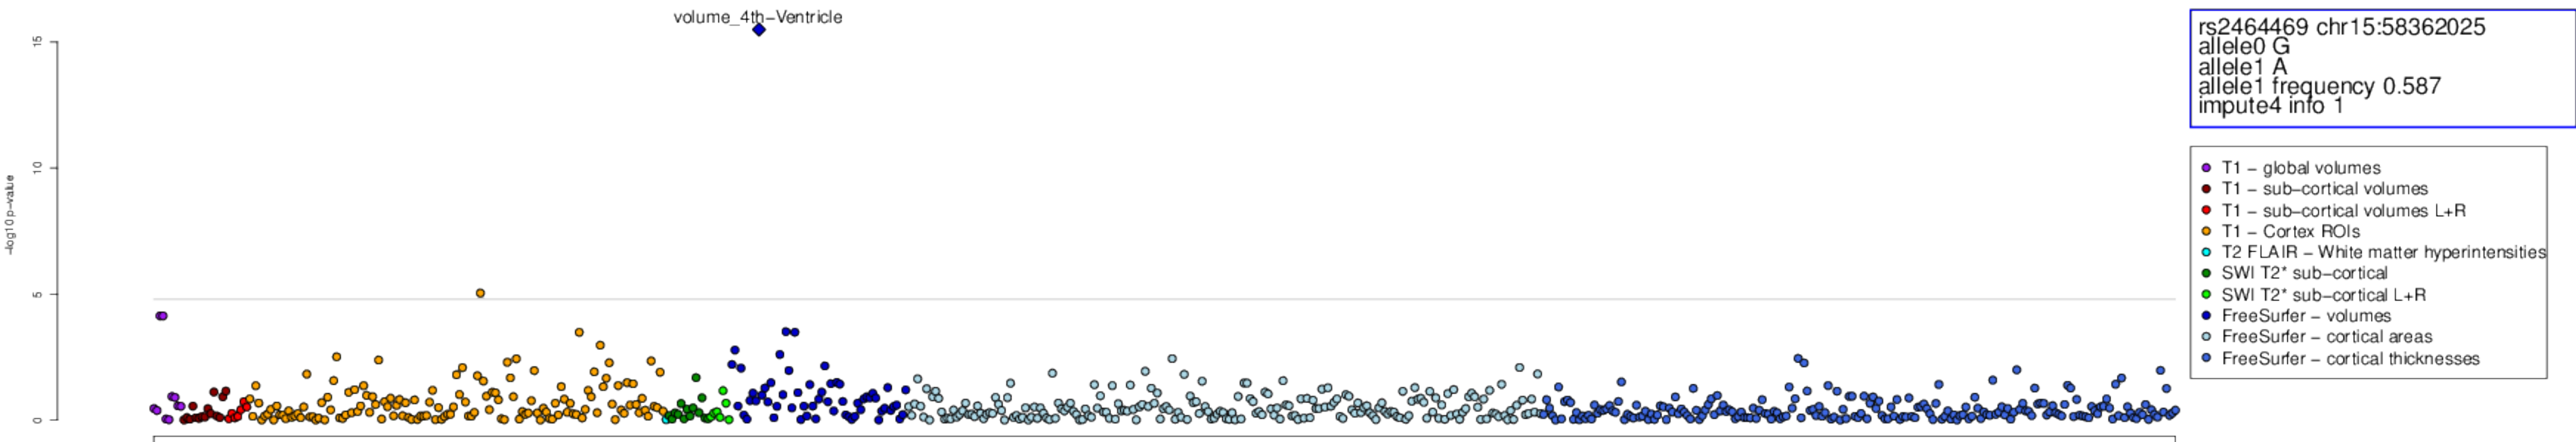

### Structural connectivity (Diffusion MRI)

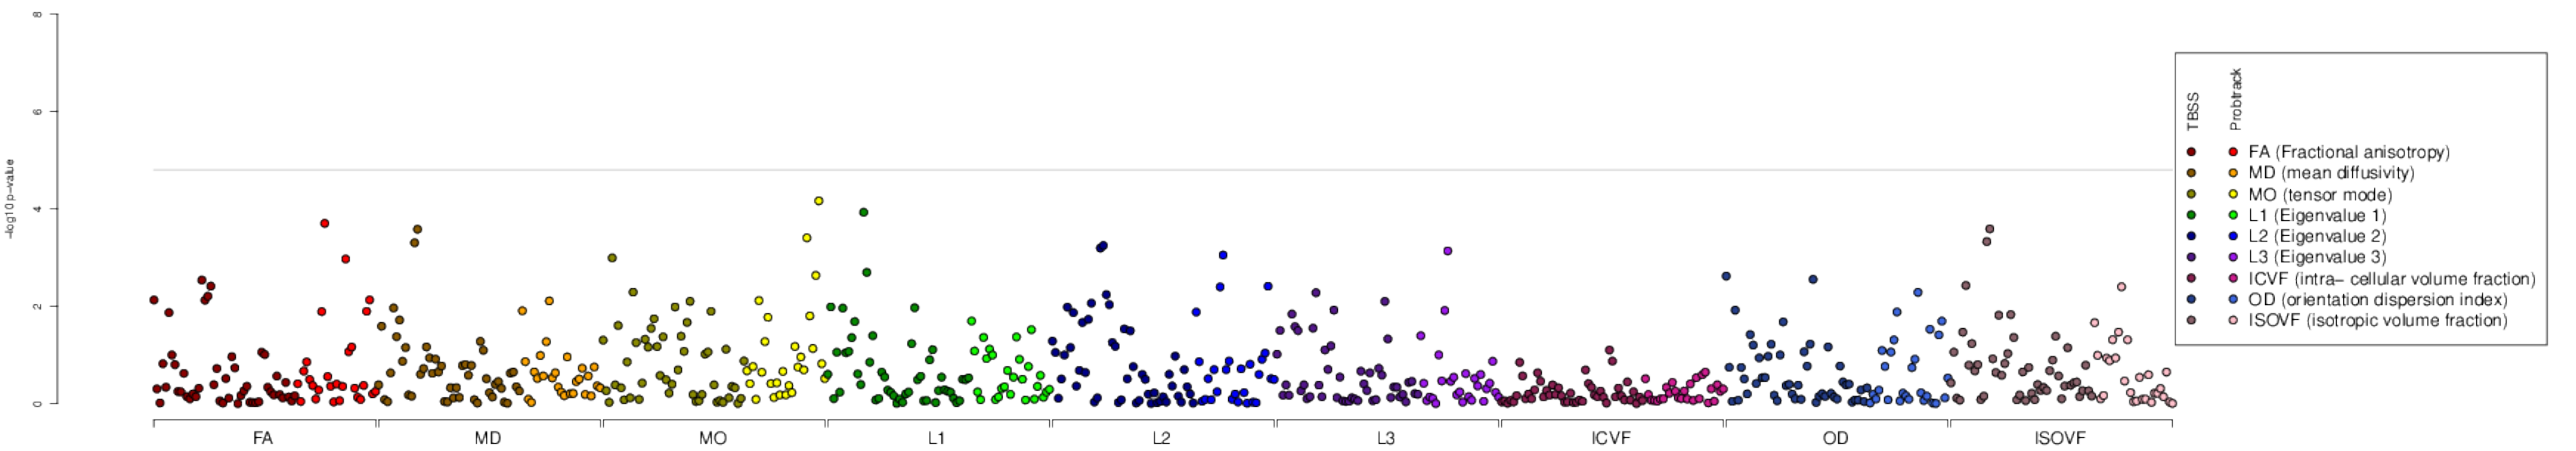

### functional MRI

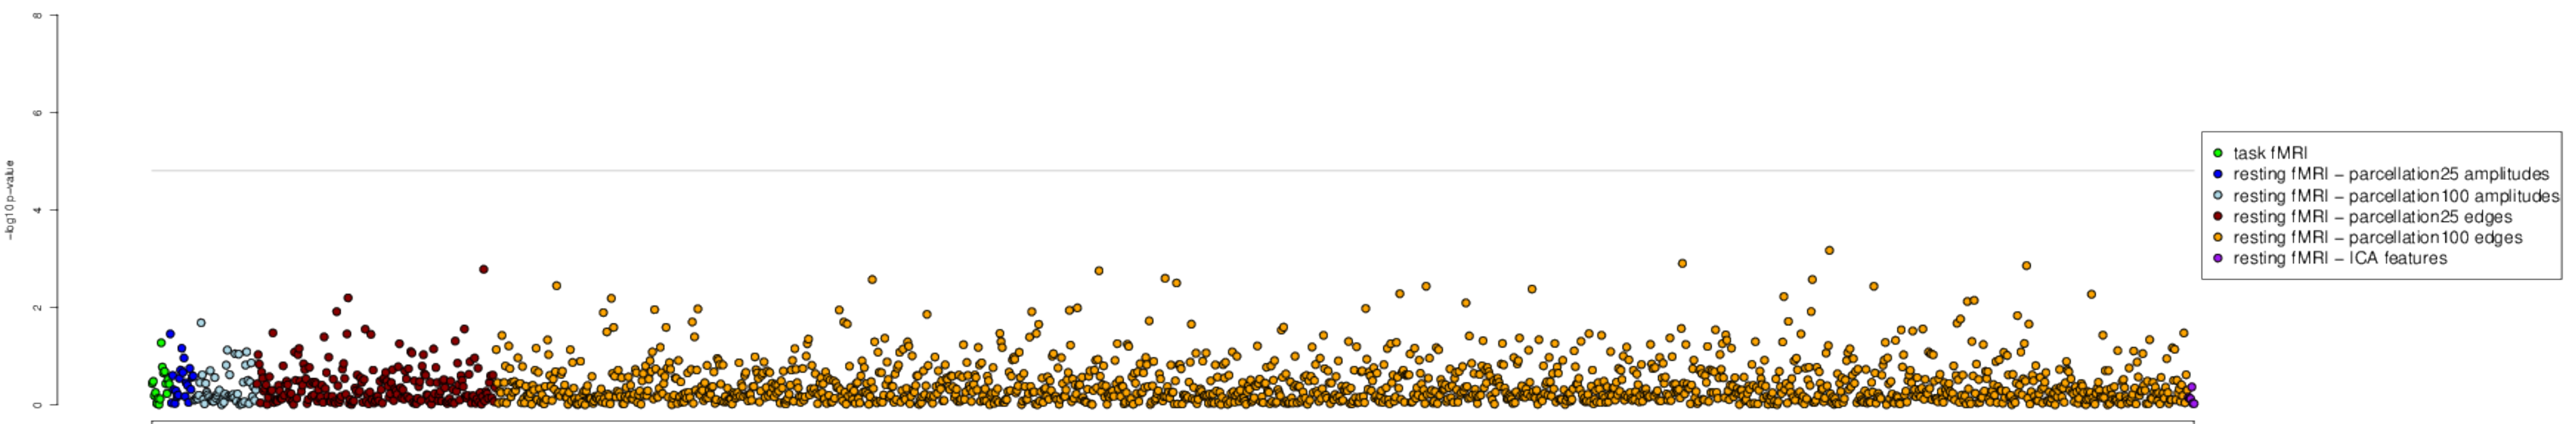

### Structural MRI

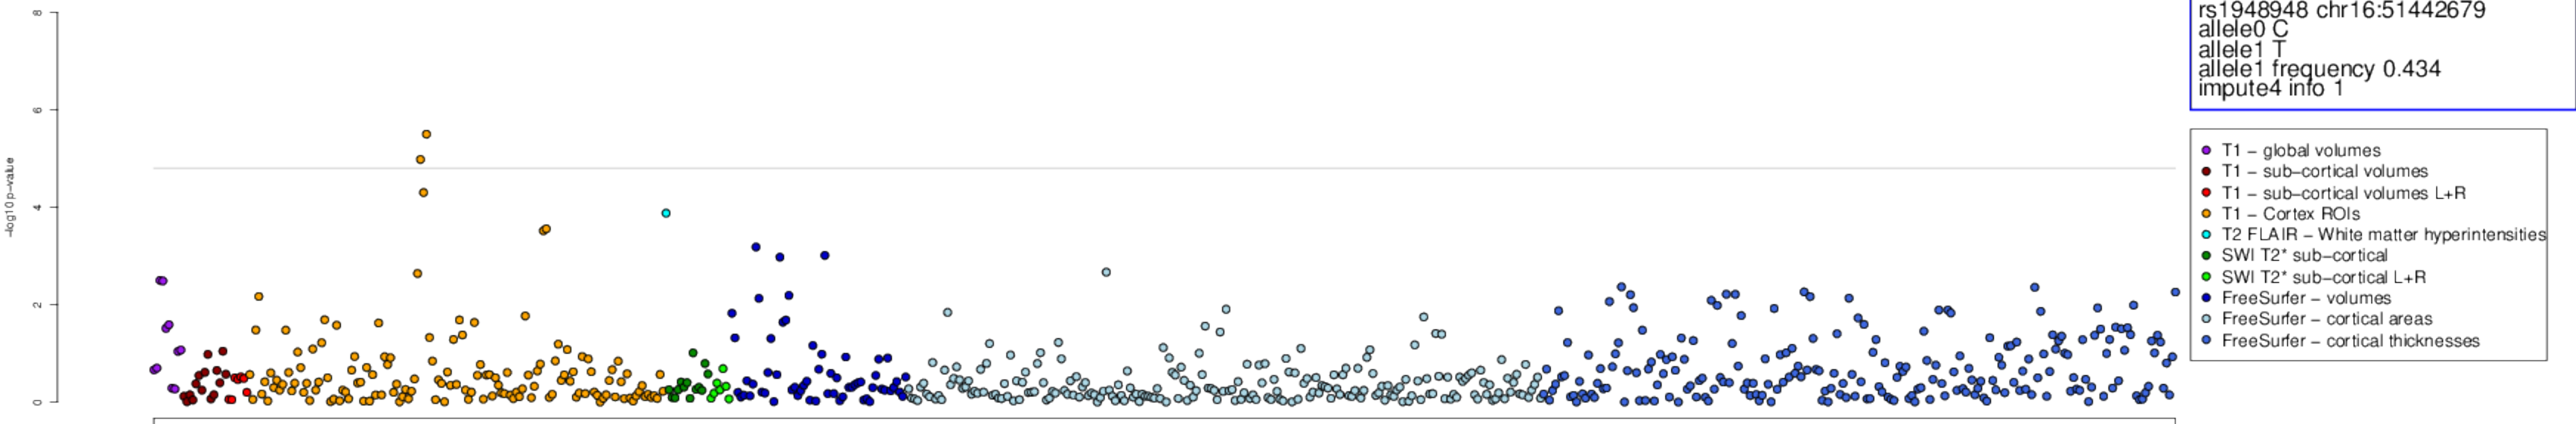

### Structural connectivity (Diffusion MRI)

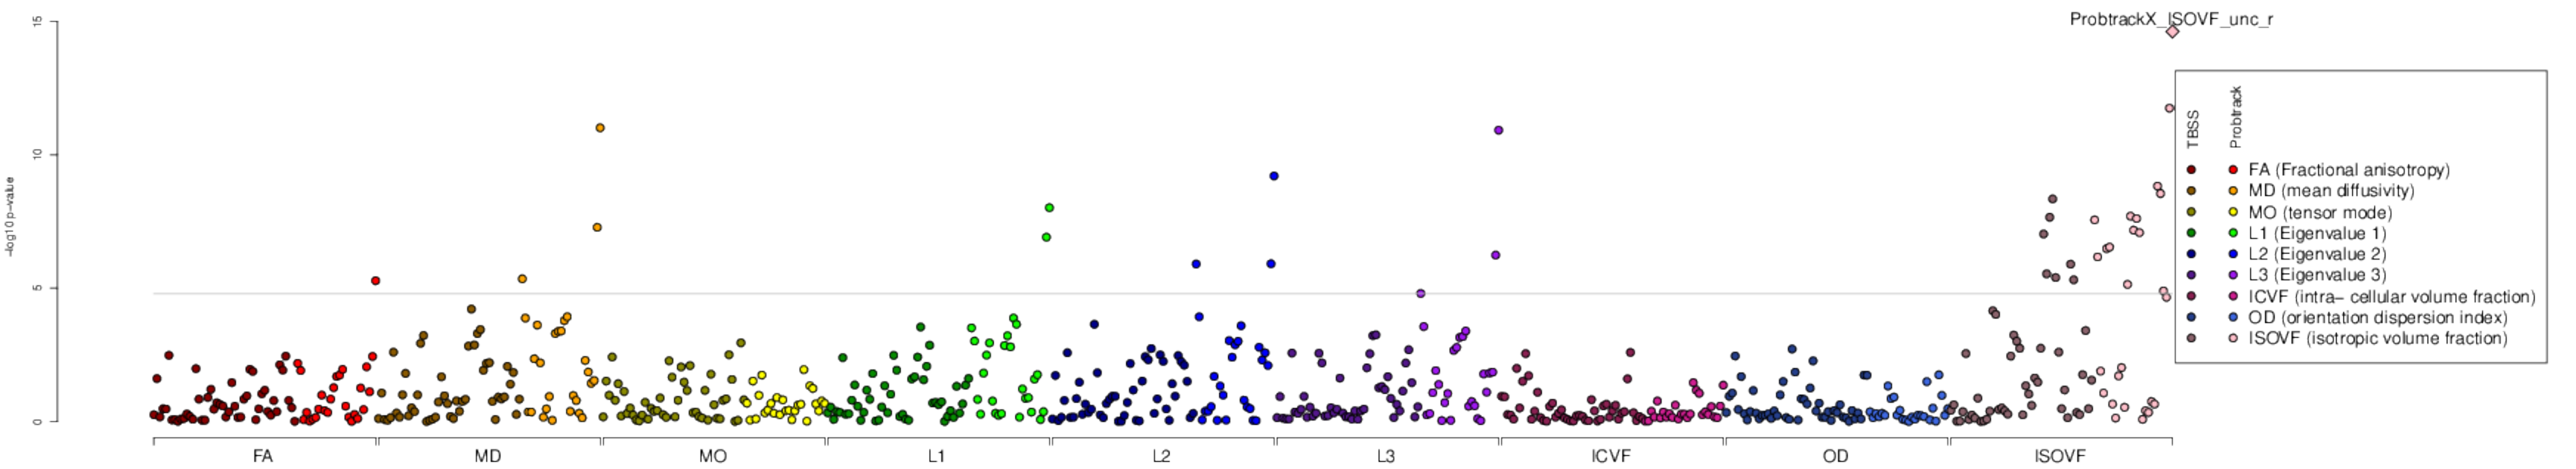

### functional MRI

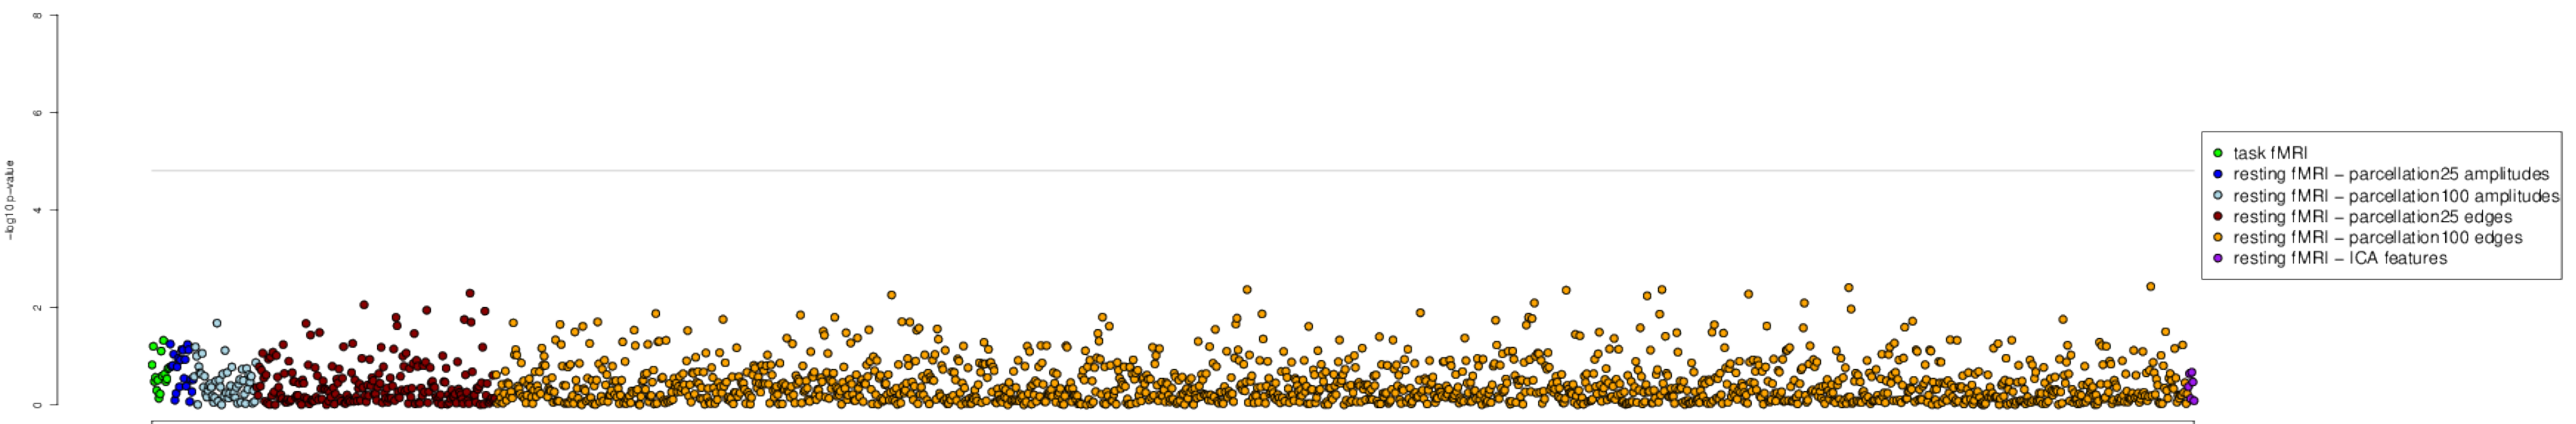

### Structural MRI

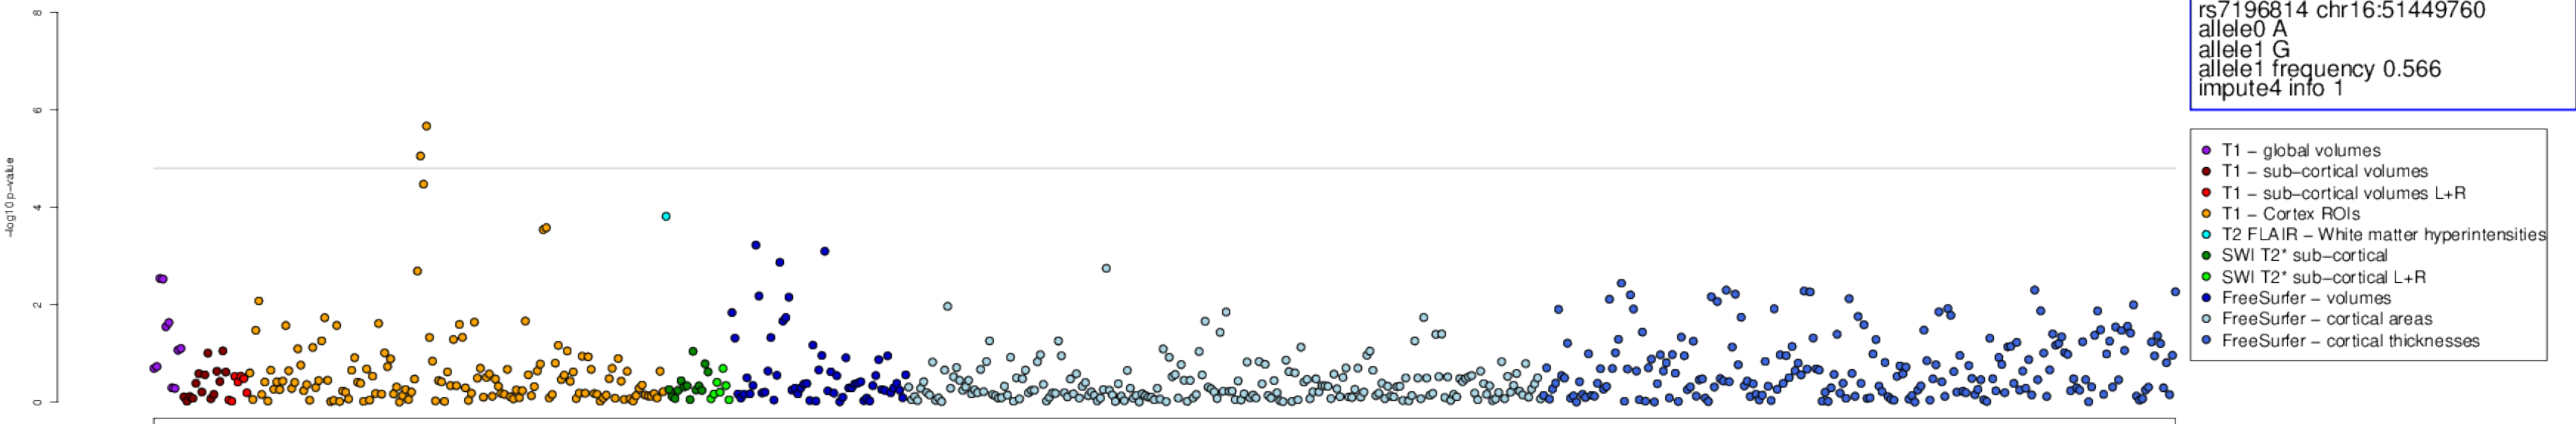

### Structural connectivity (Diffusion MRI)

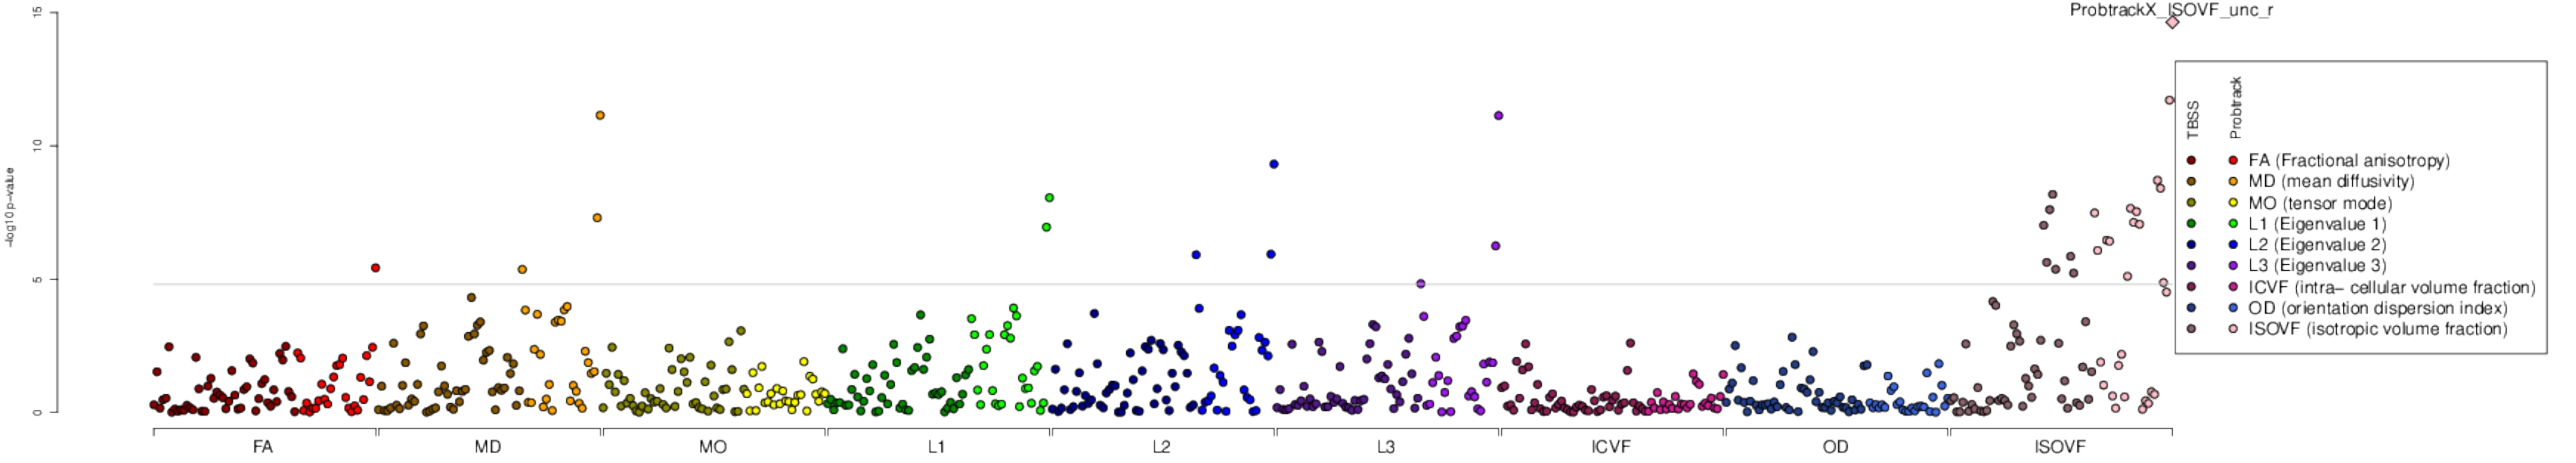

### functional MRI

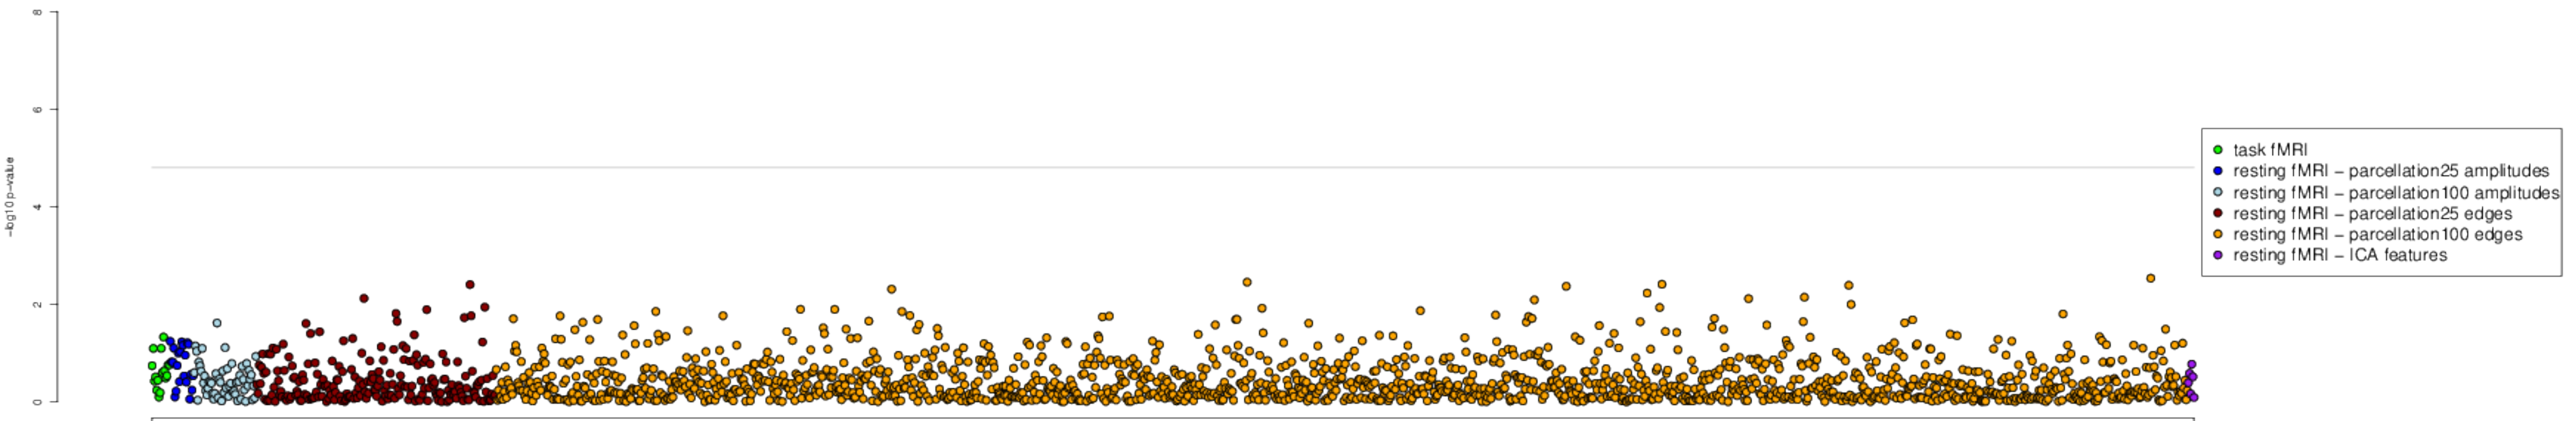



### Structural MRI

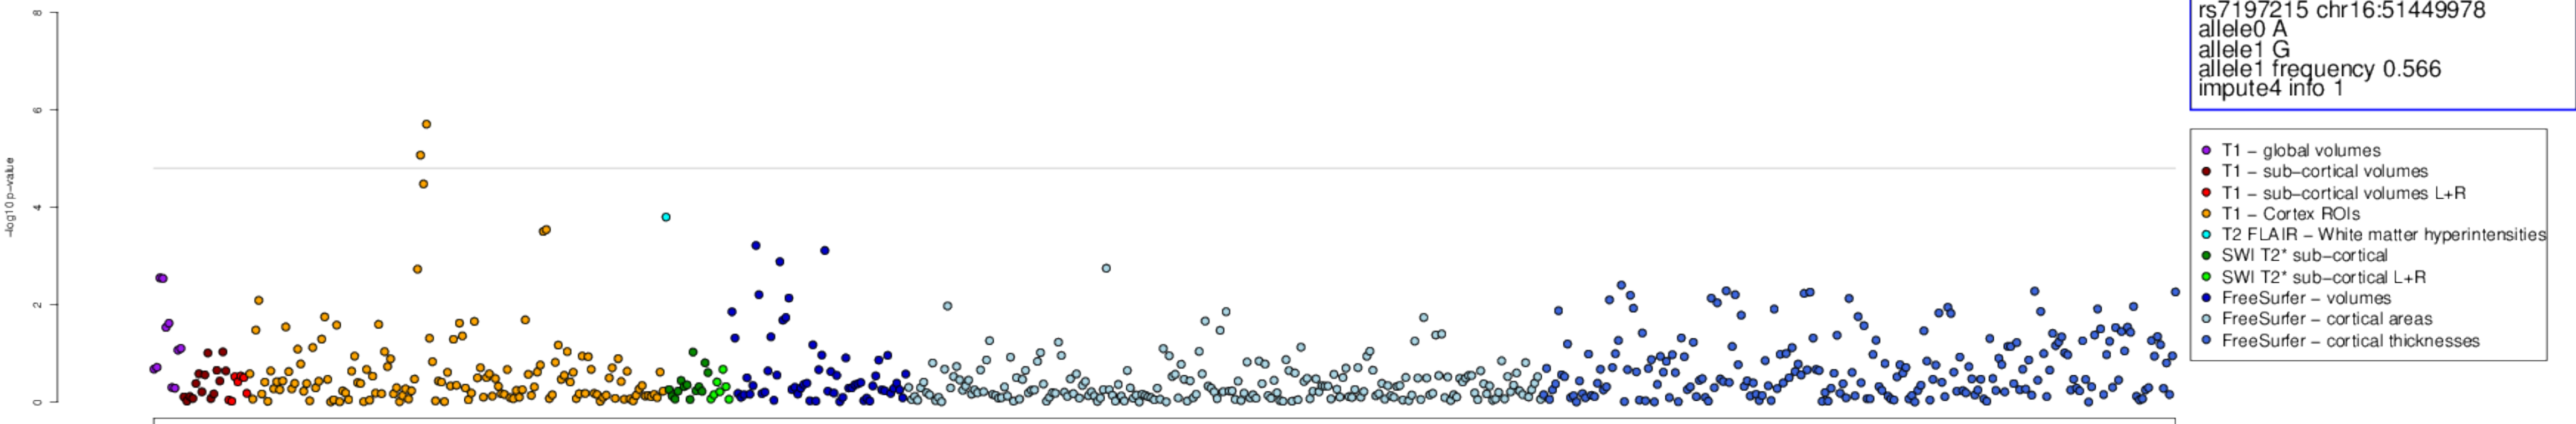

### Structural connectivity (Diffusion MRI)

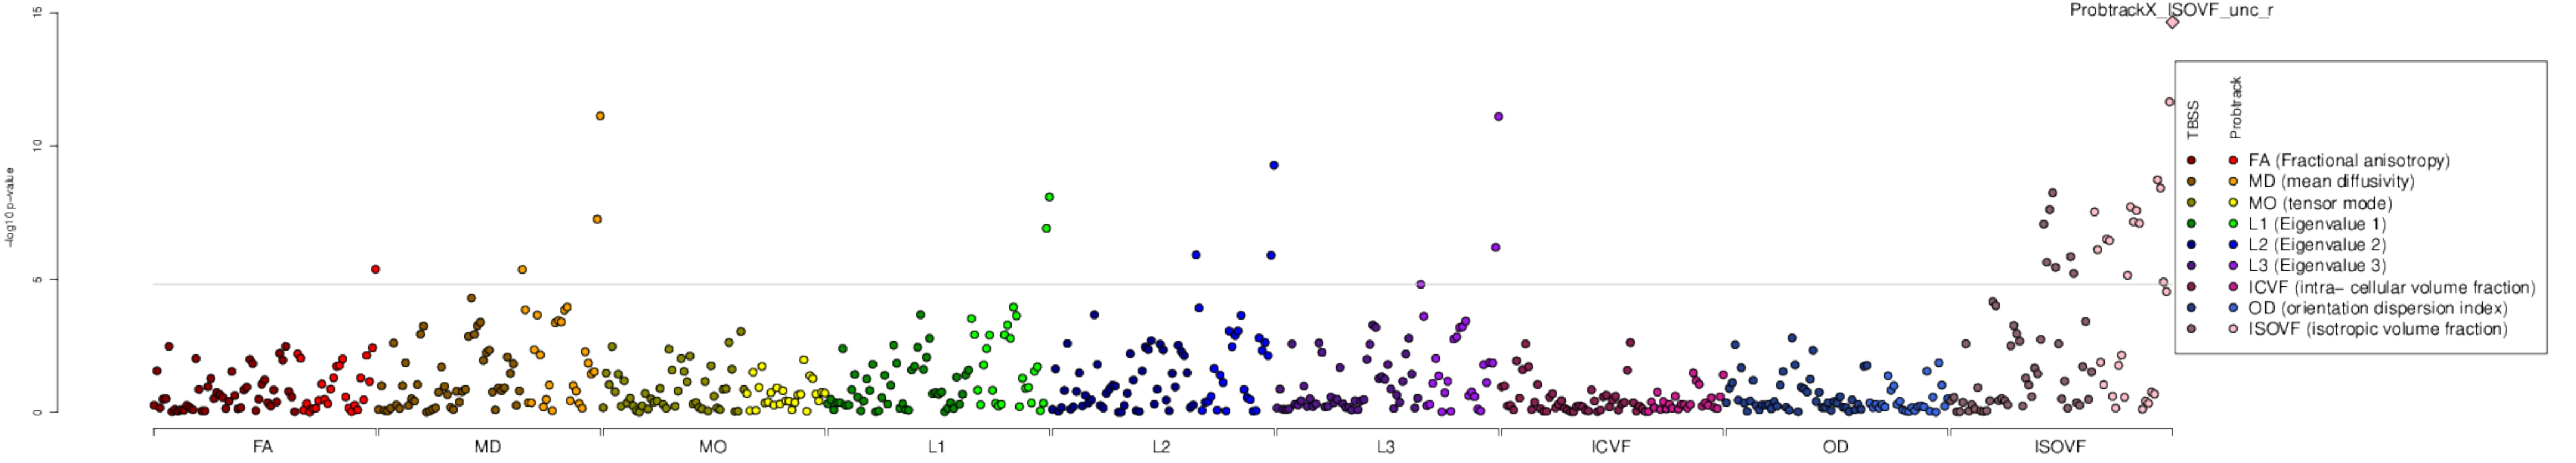

### functional MRI

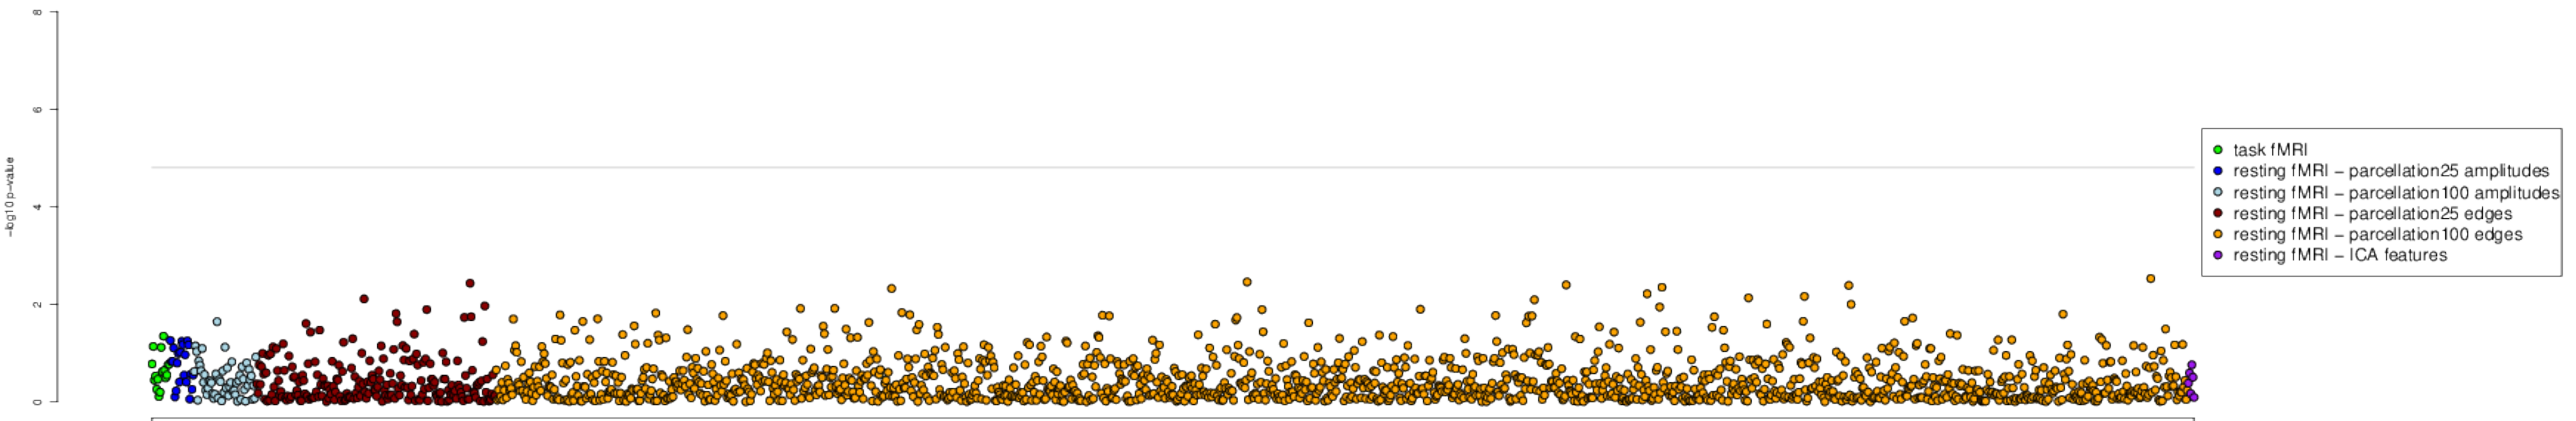

### Structural MRI

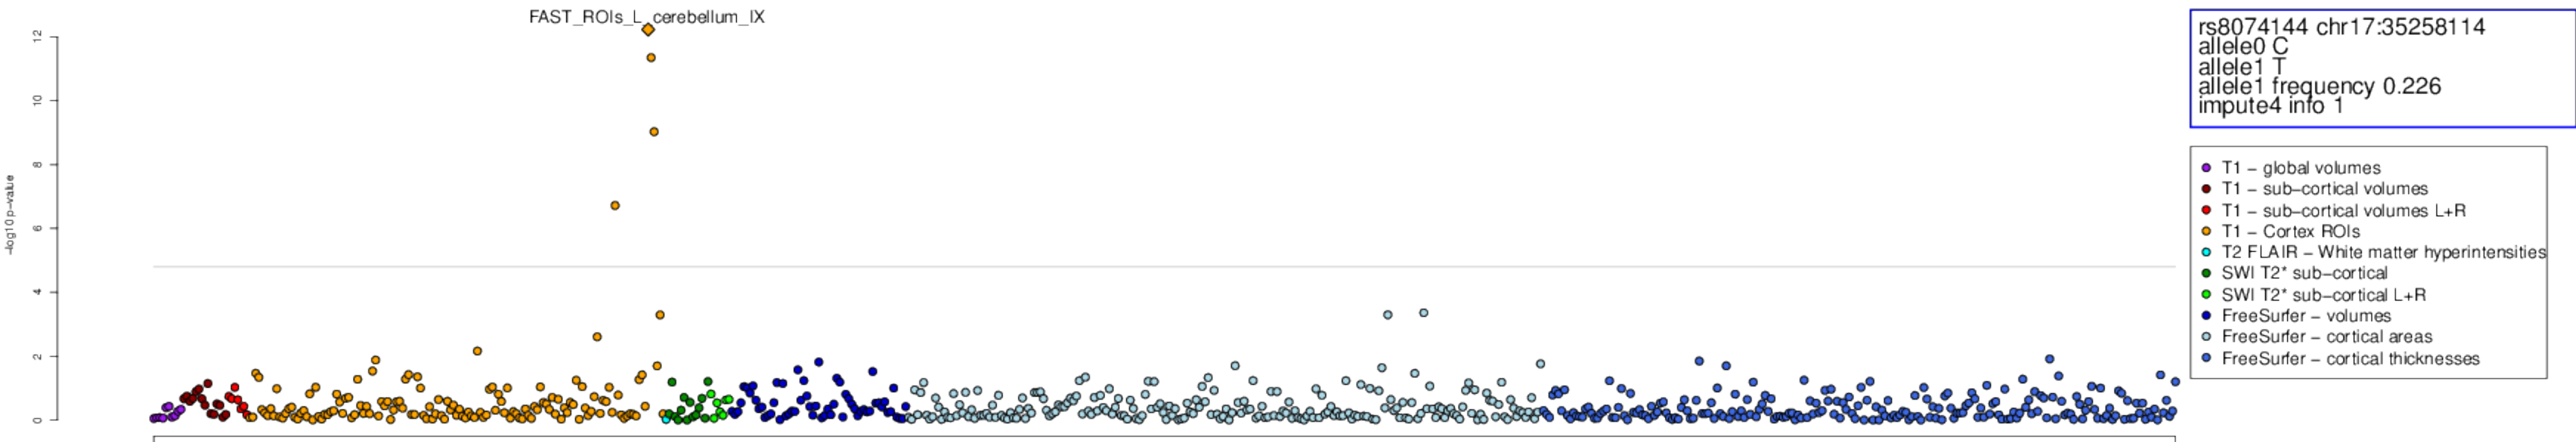

### Structural connectivity (Diffusion MRI)

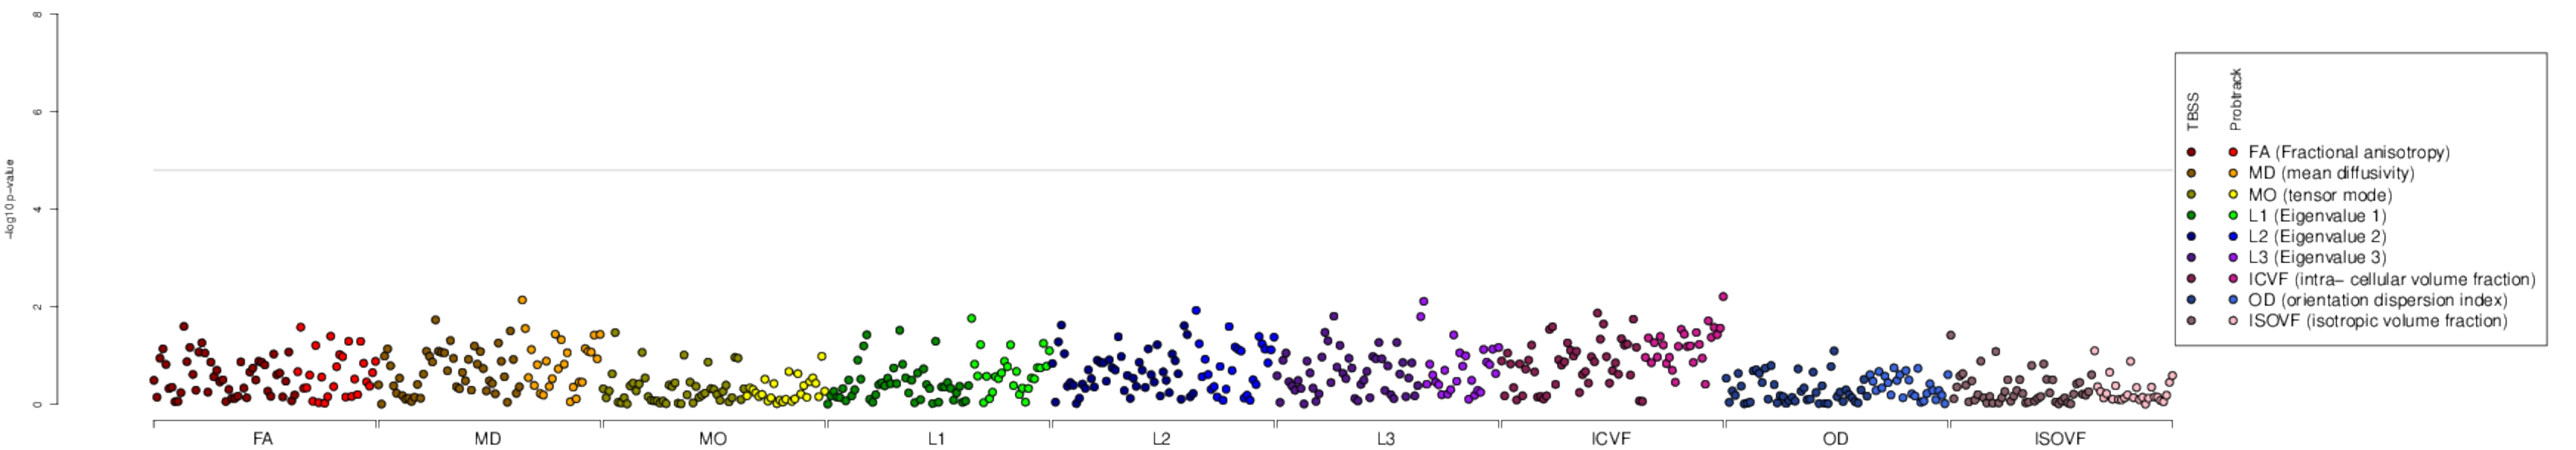

### functional MRI

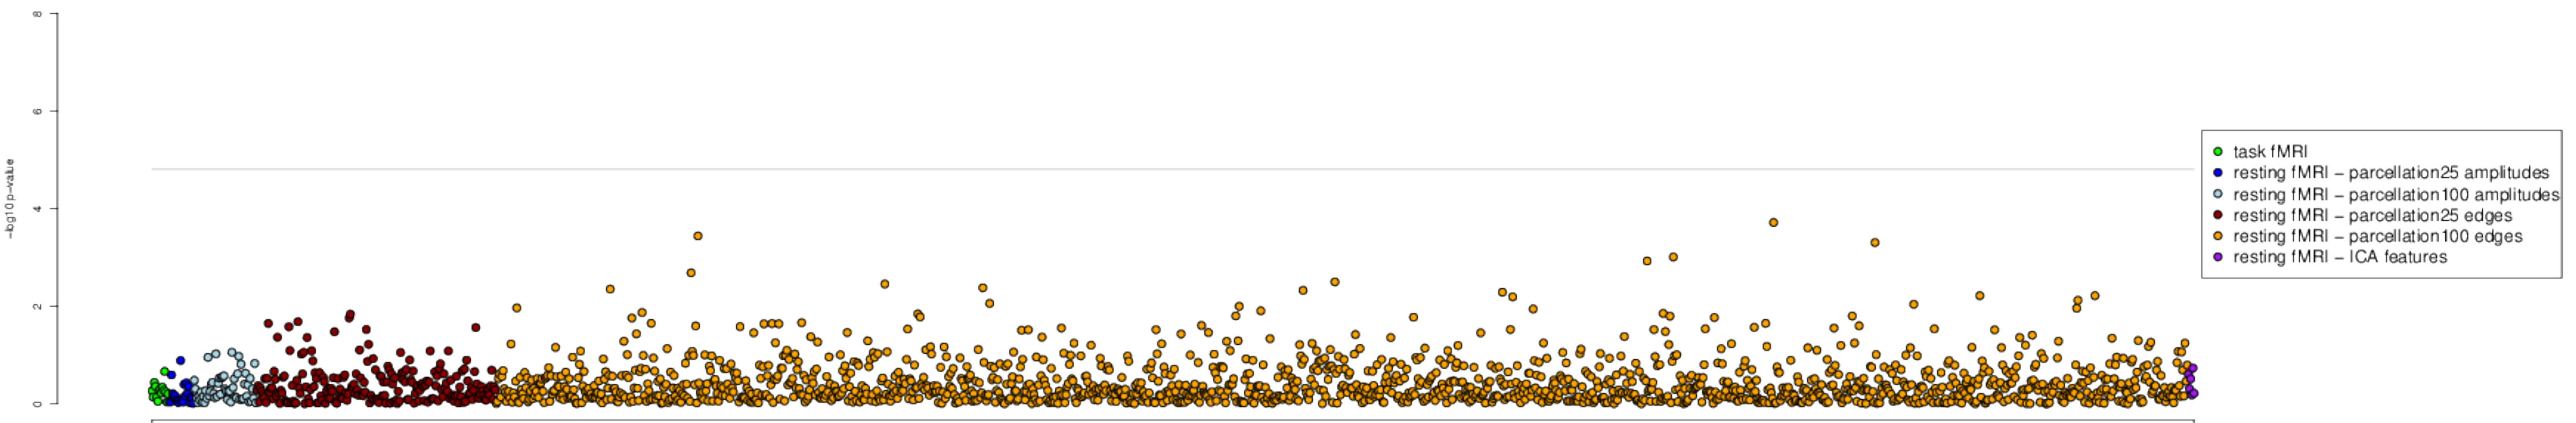

### Structural MRI

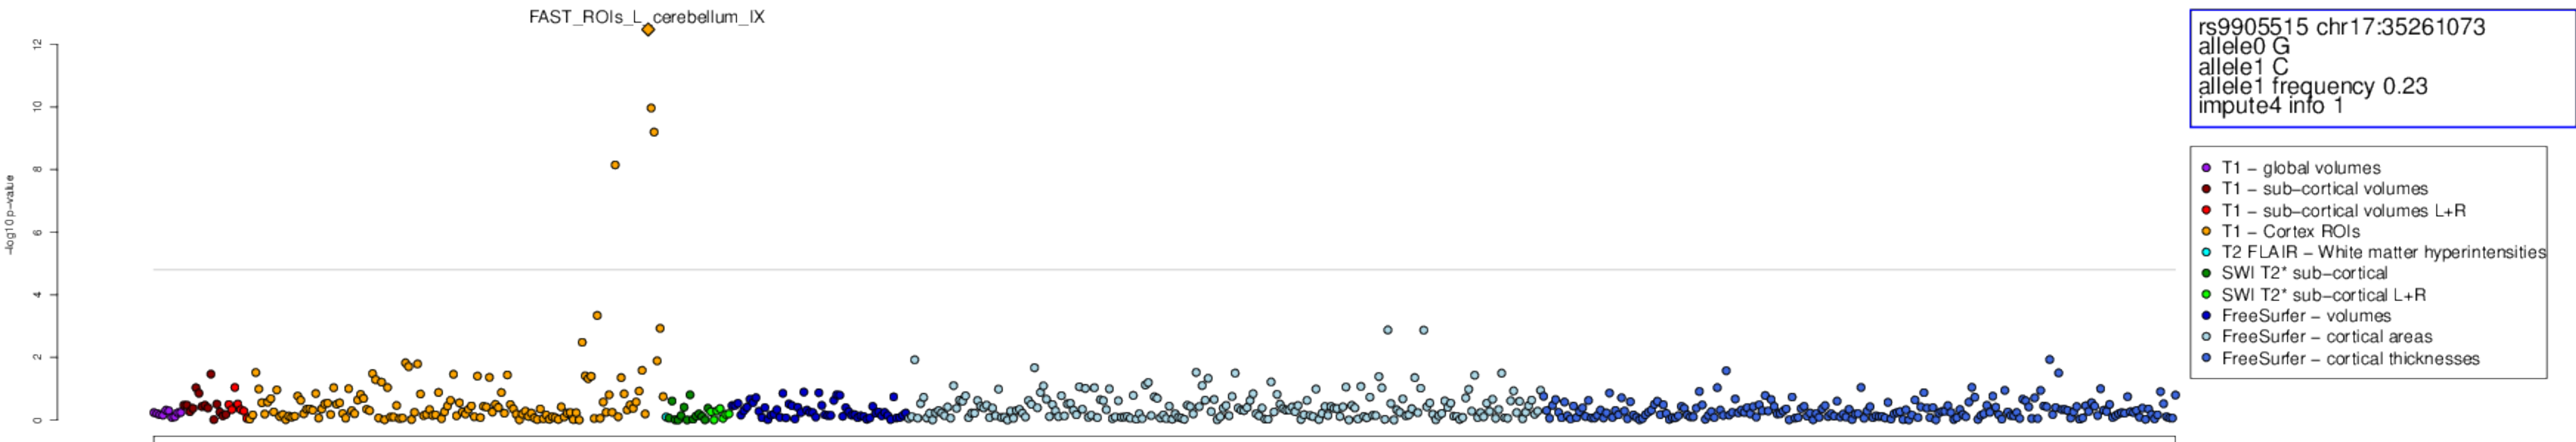

### Structural connectivity (Diffusion MRI)

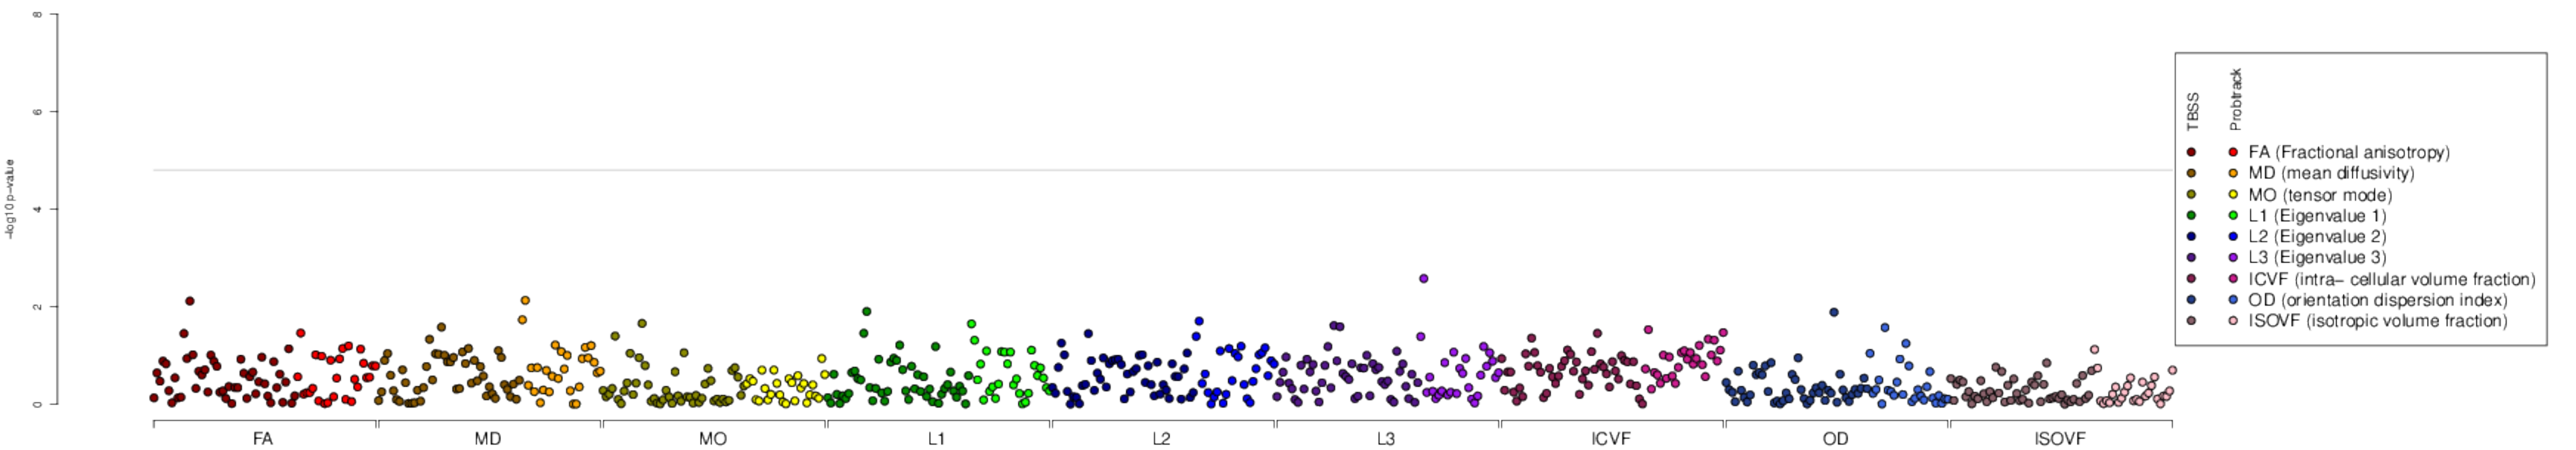

### functional MRI

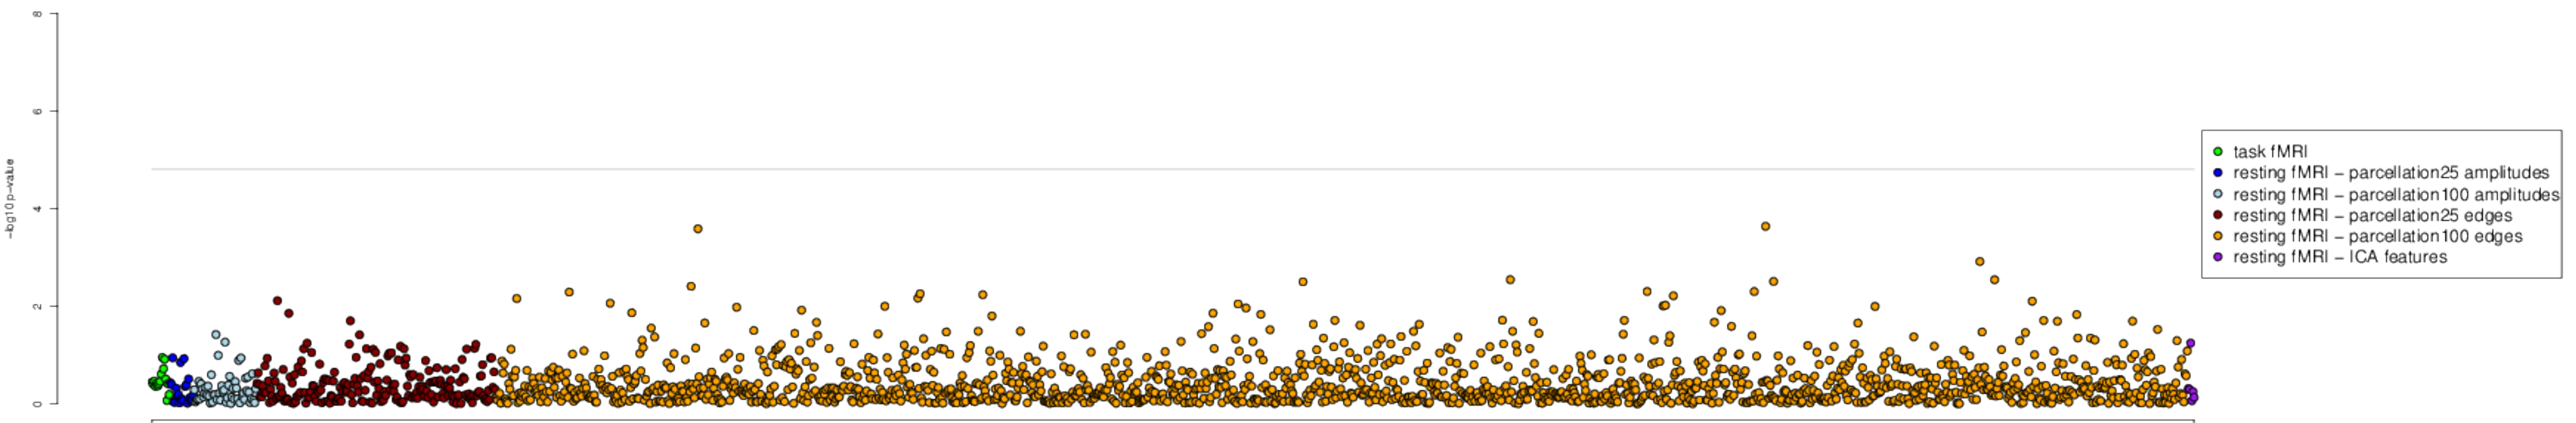

### Structural MRI

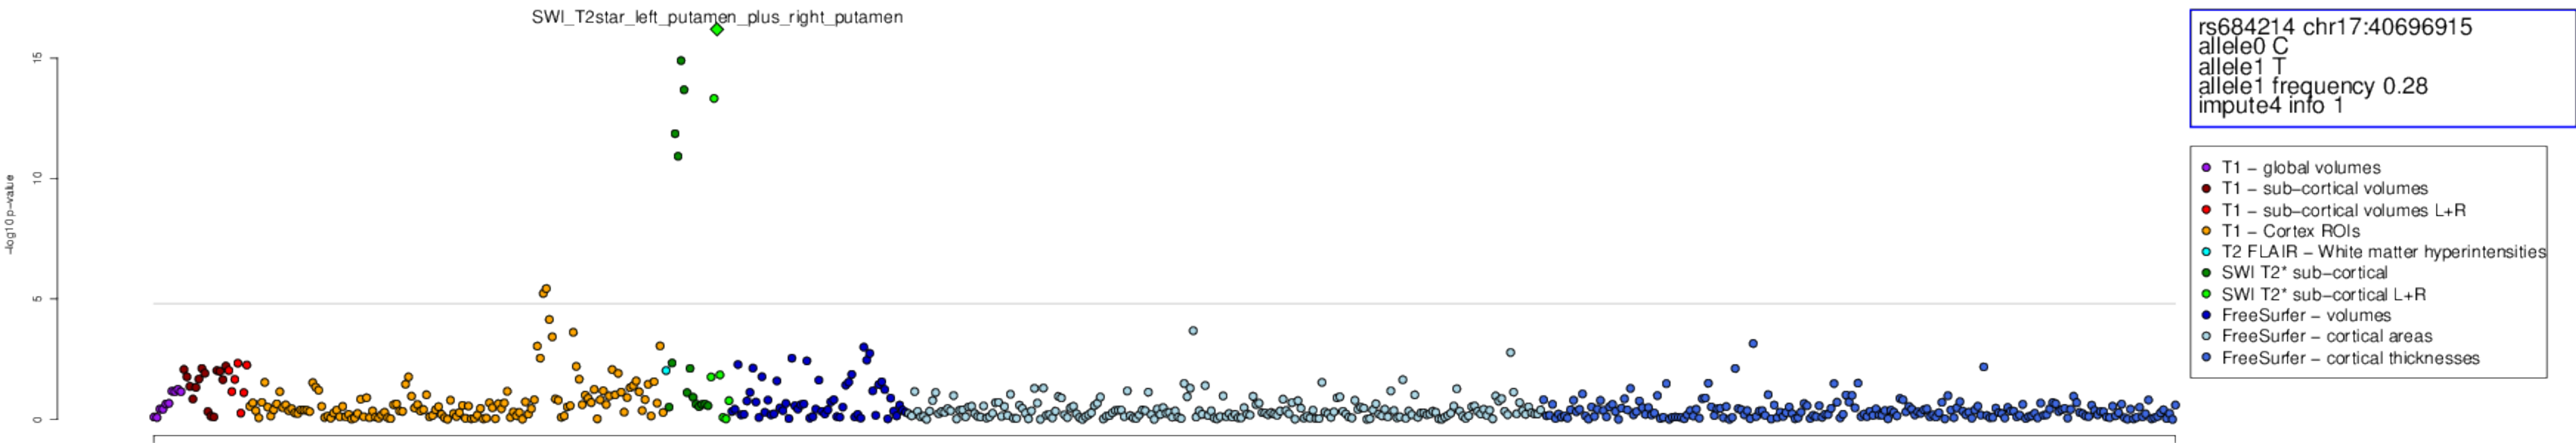

### Structural connectivity (Diffusion MRI)

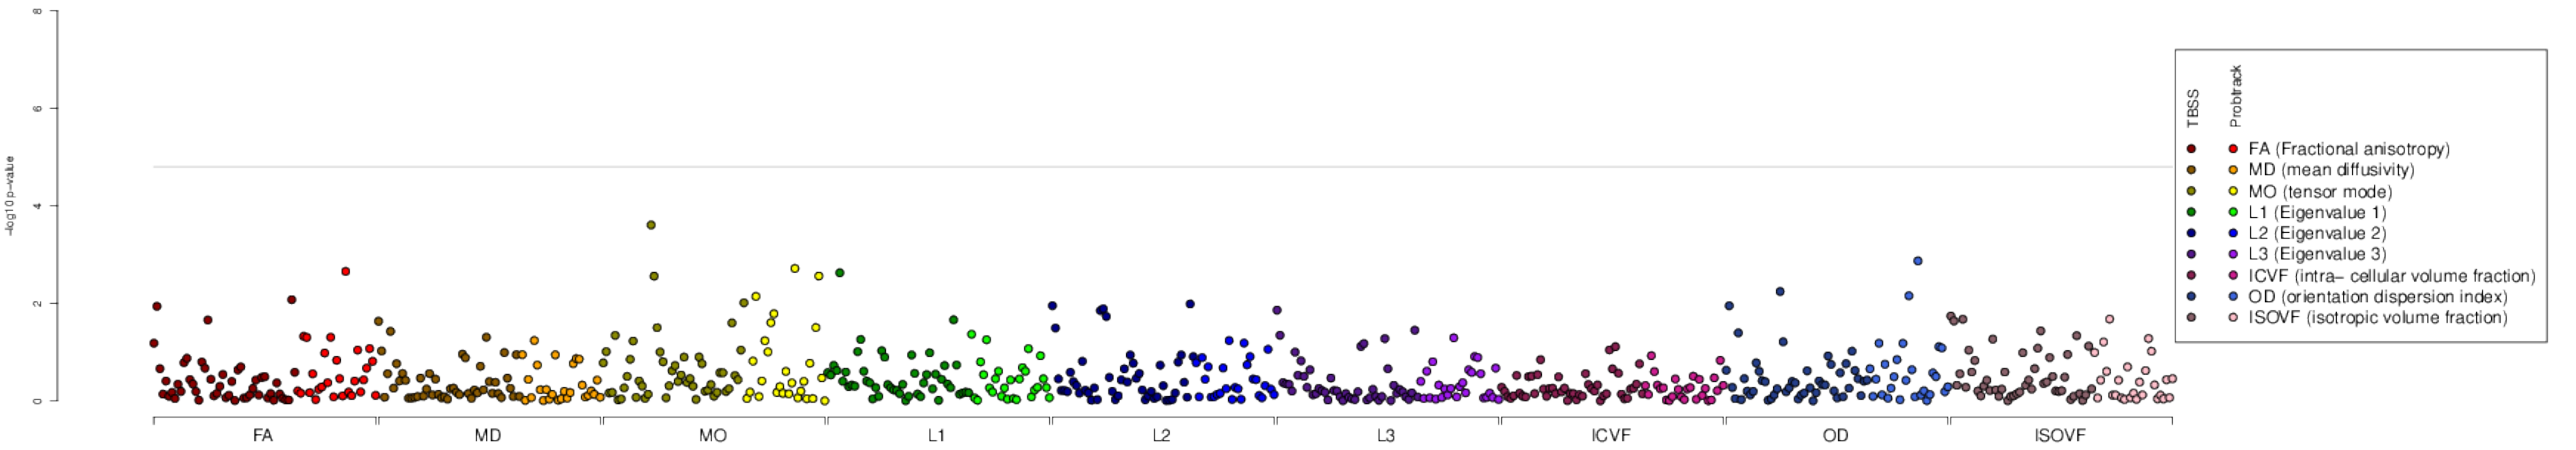

### functional MRI

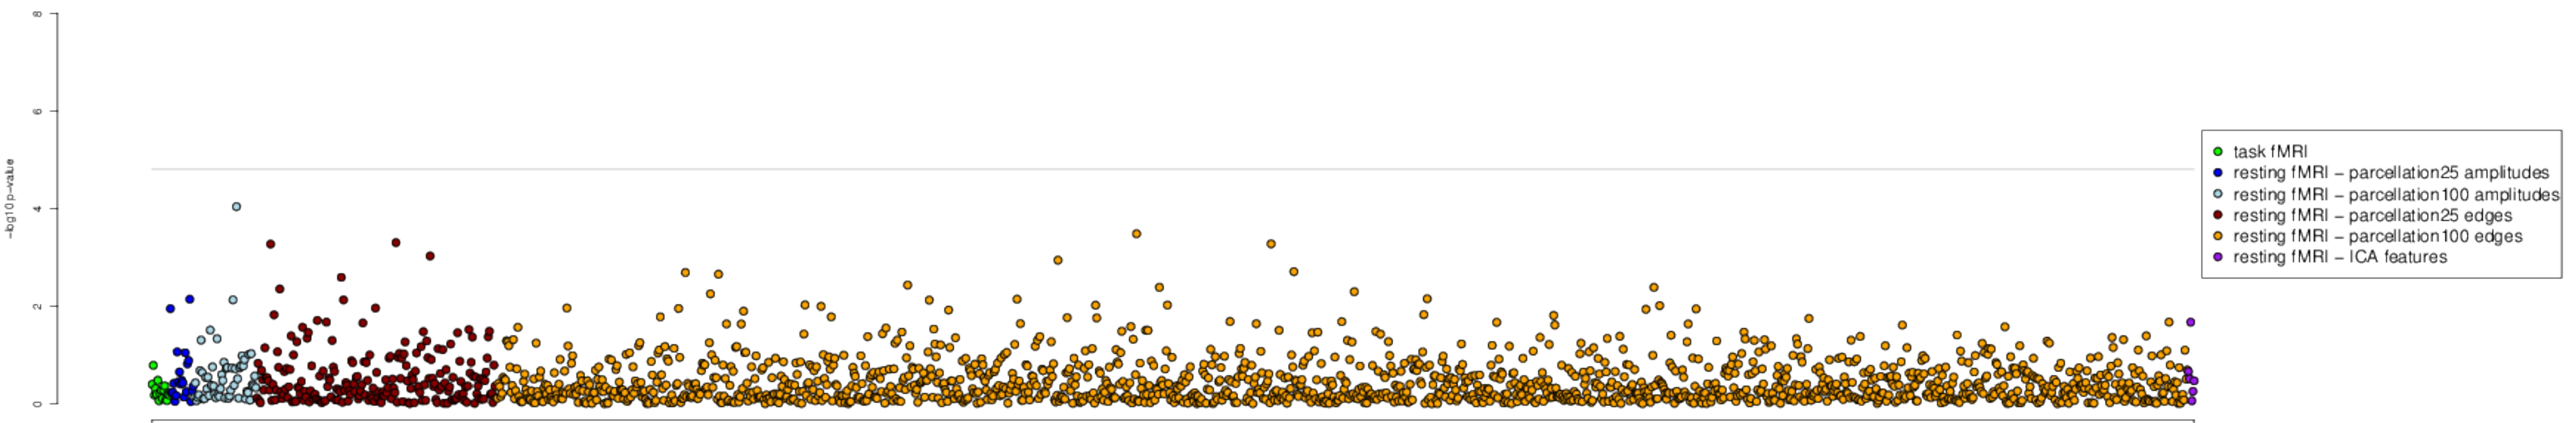

### Structural MRI

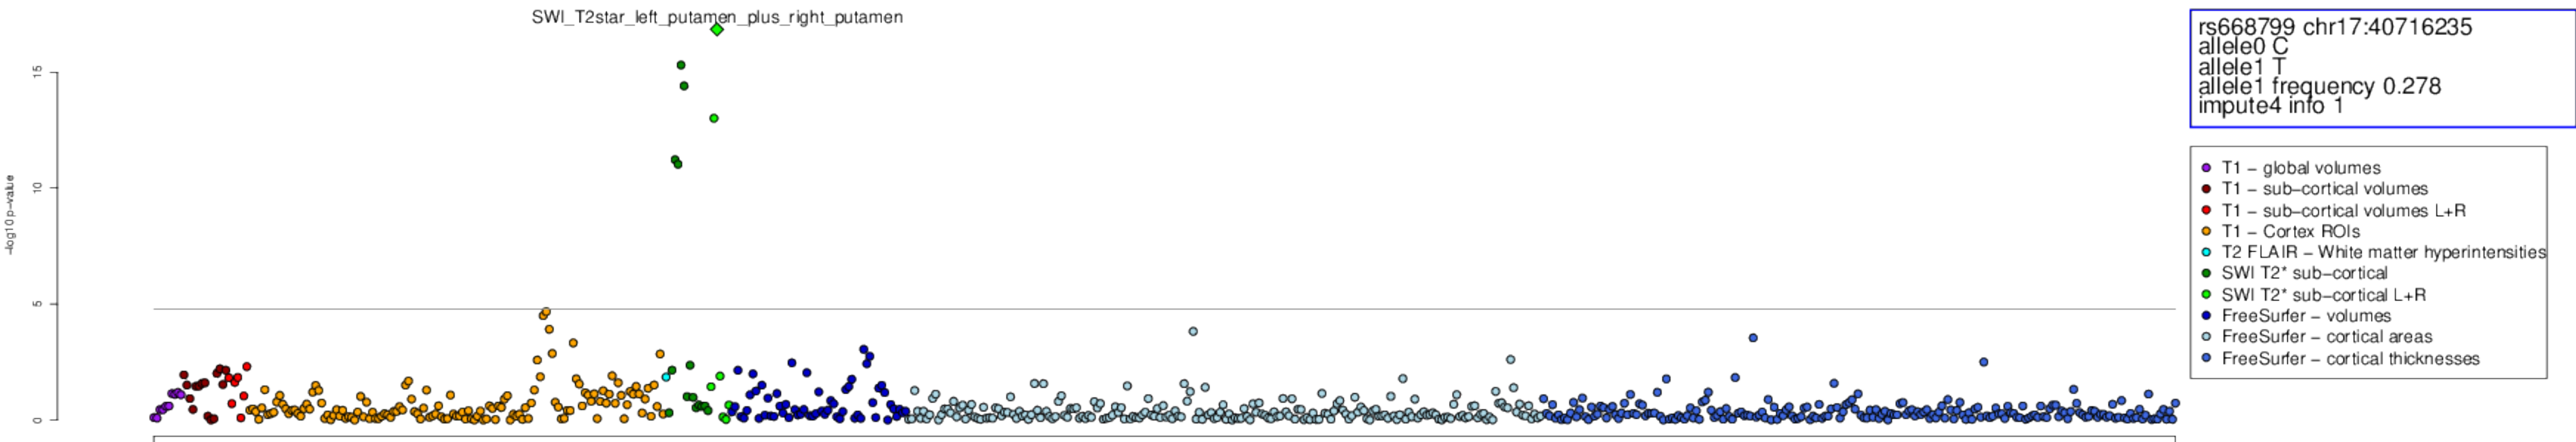

### Structural connectivity (Diffusion MRI)

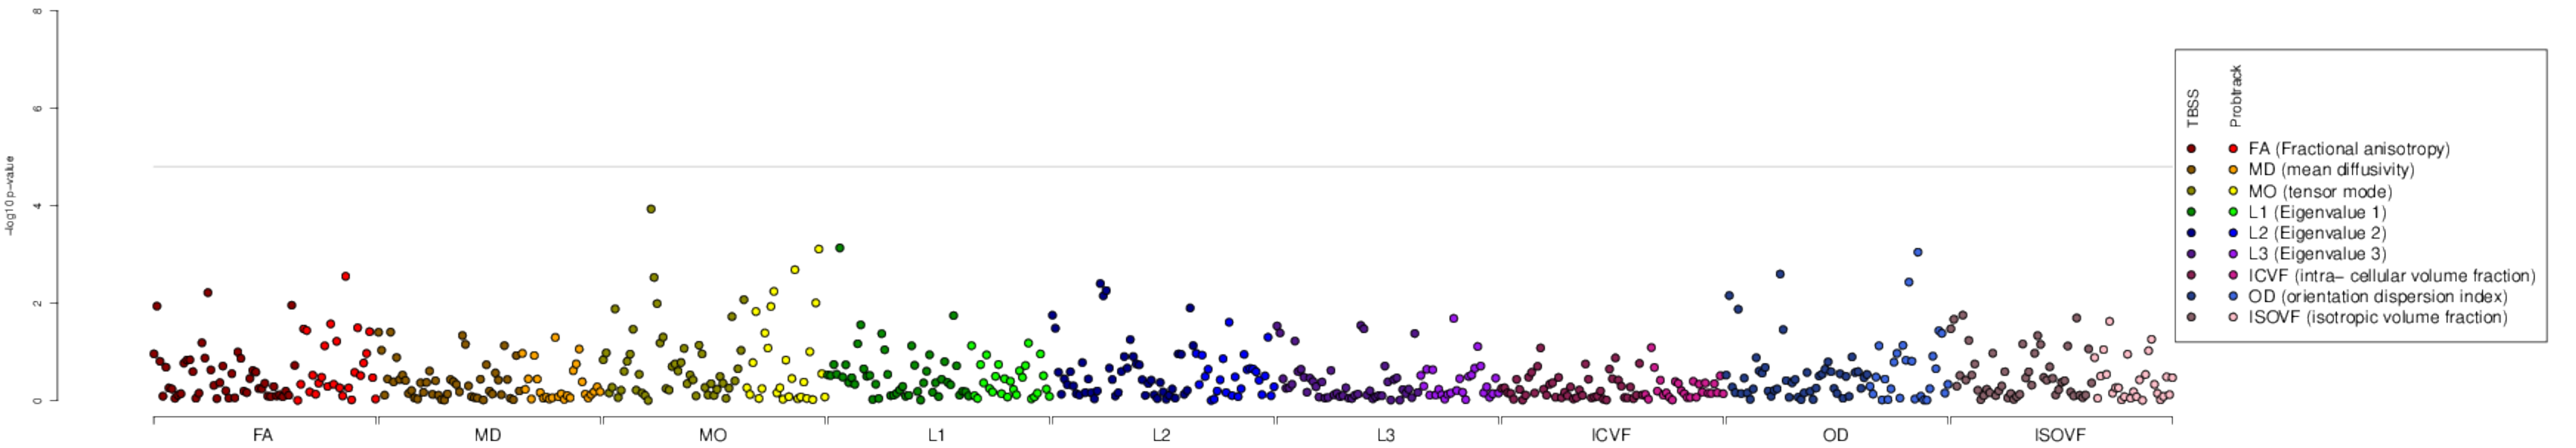

### functional MRI

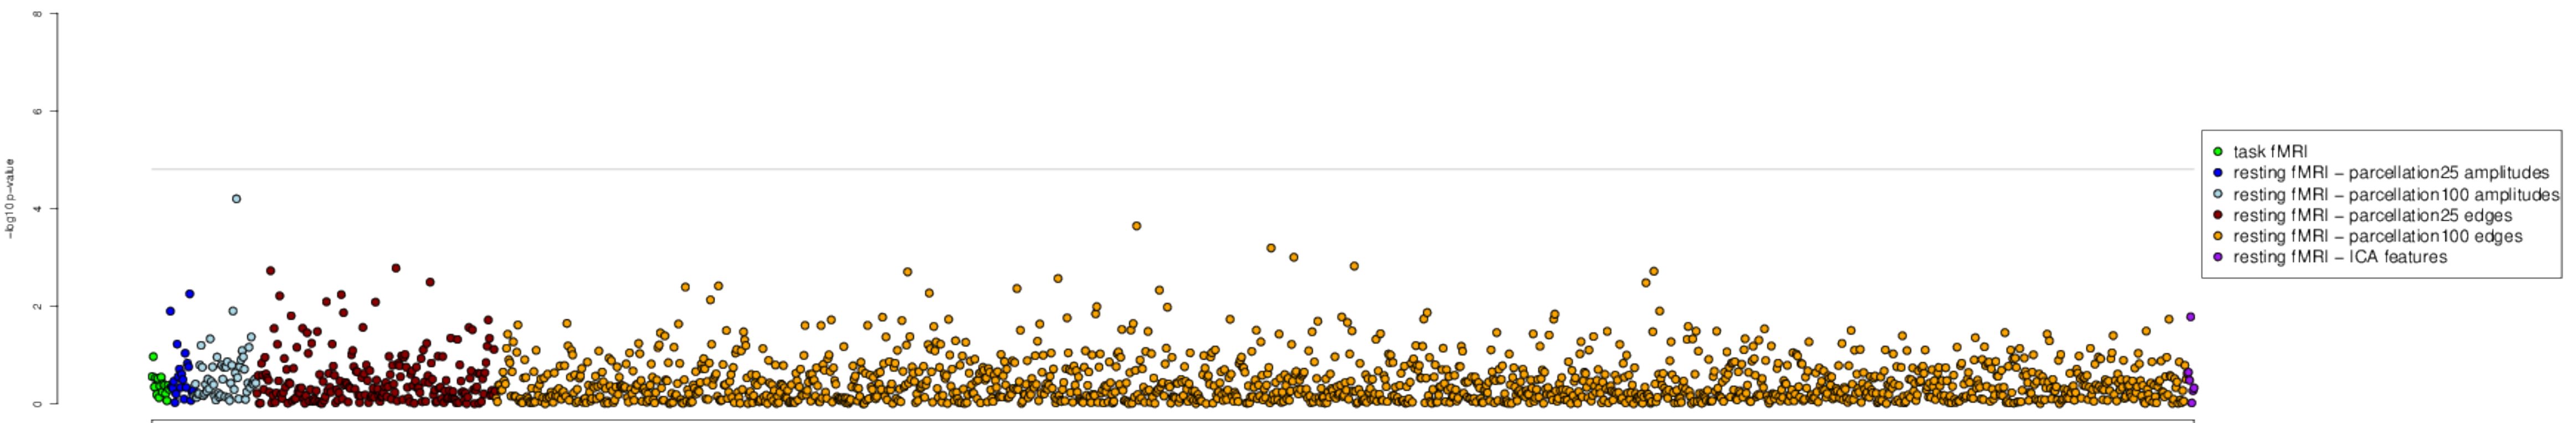

### Structural MRI

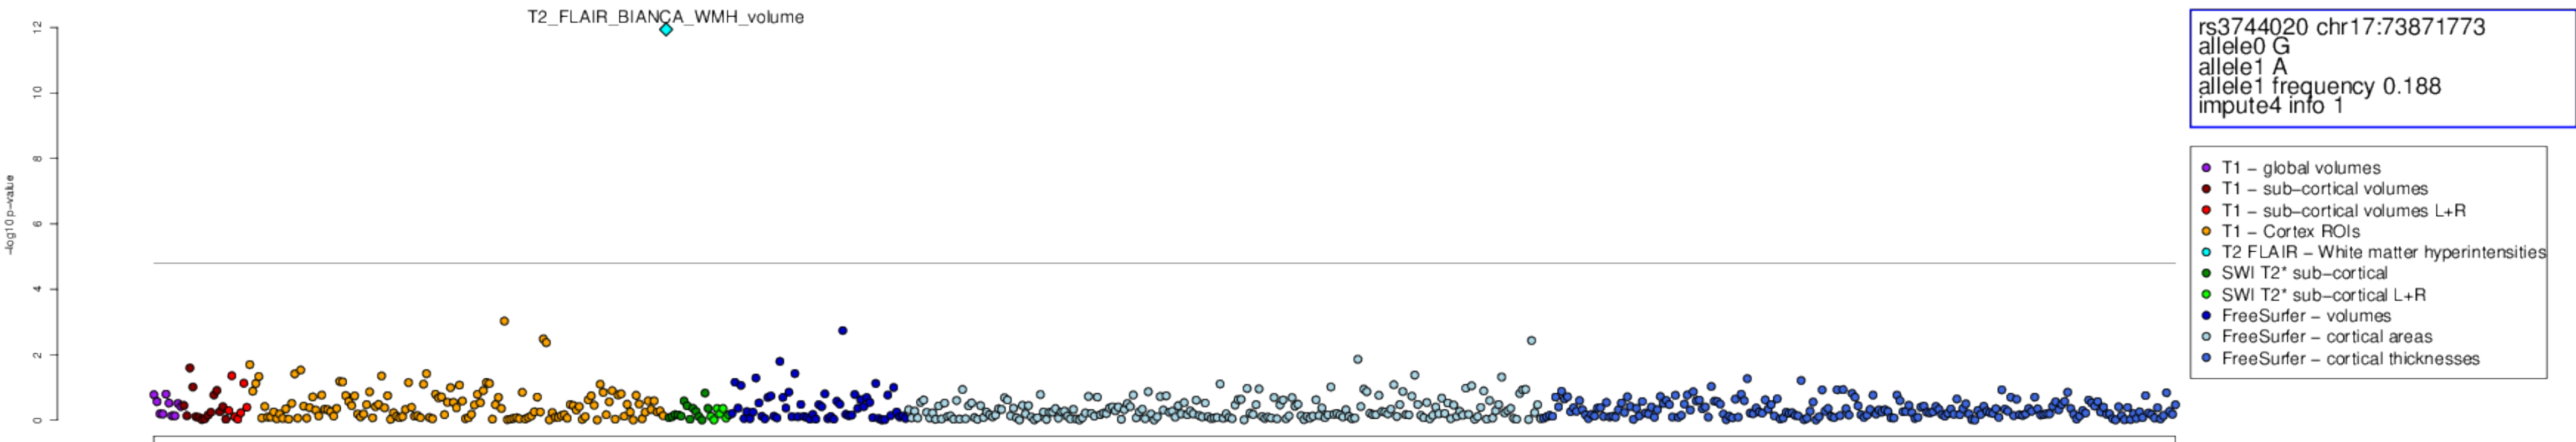

### Structural connectivity (Diffusion MRI)

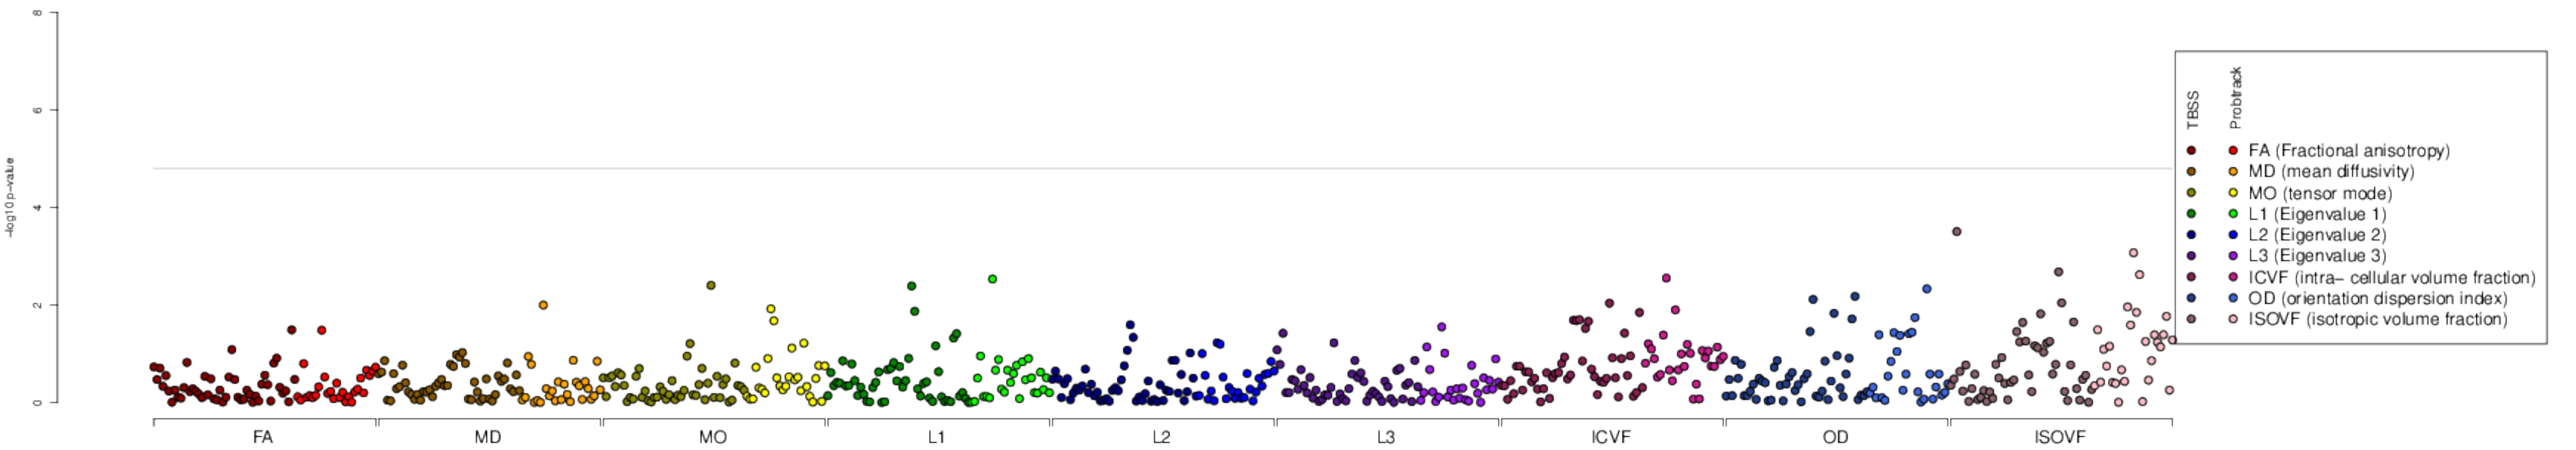

### functional MRI

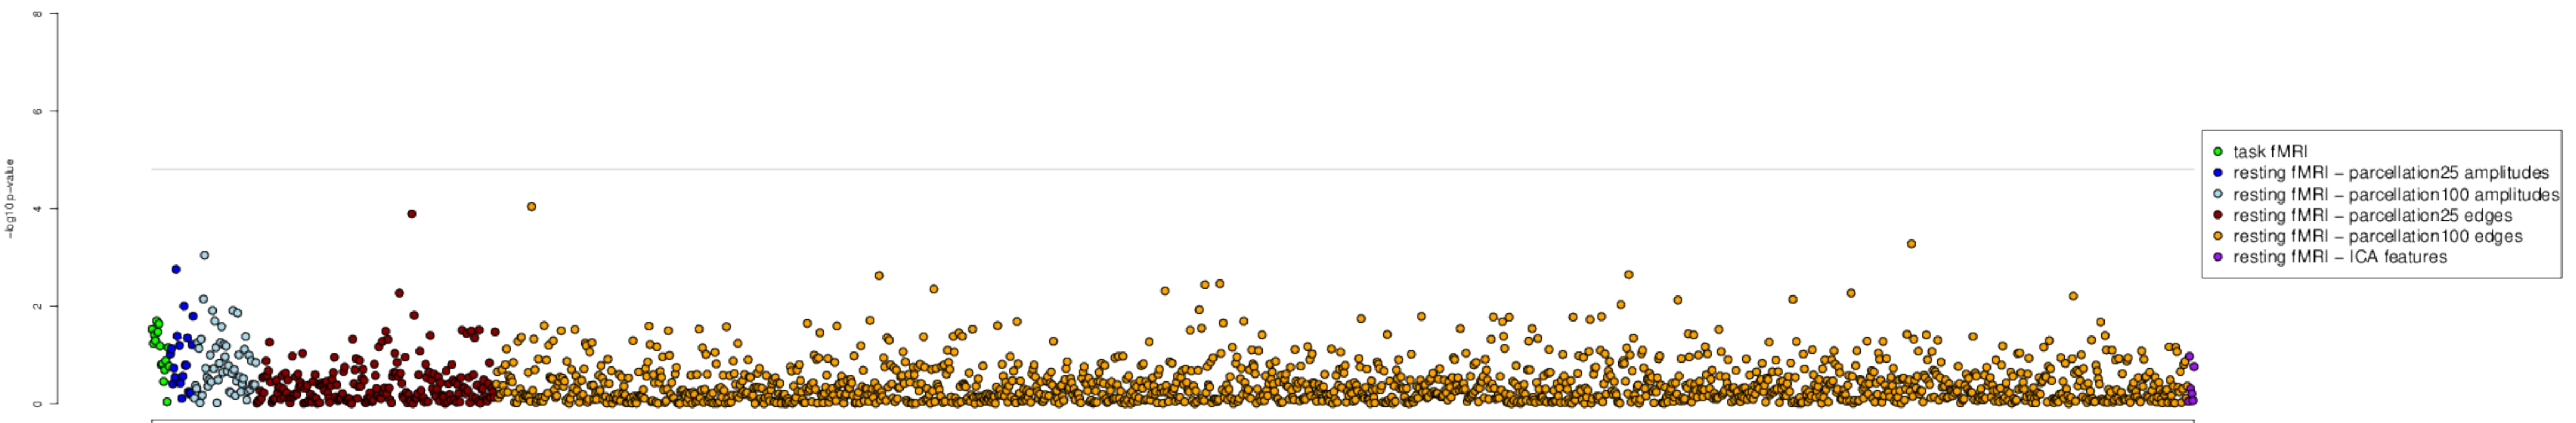

### Structural MRI

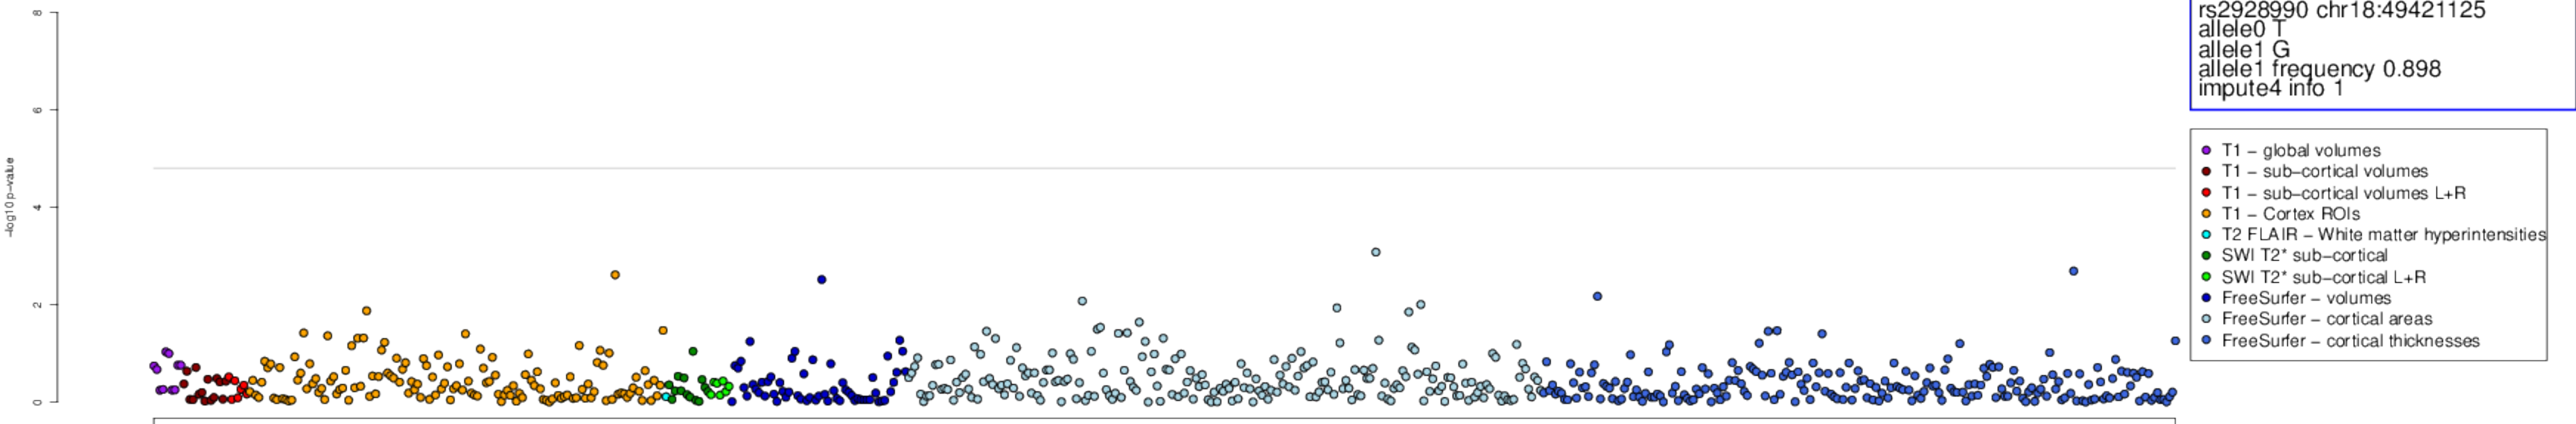

### Structural connectivity (Diffusion MRI)

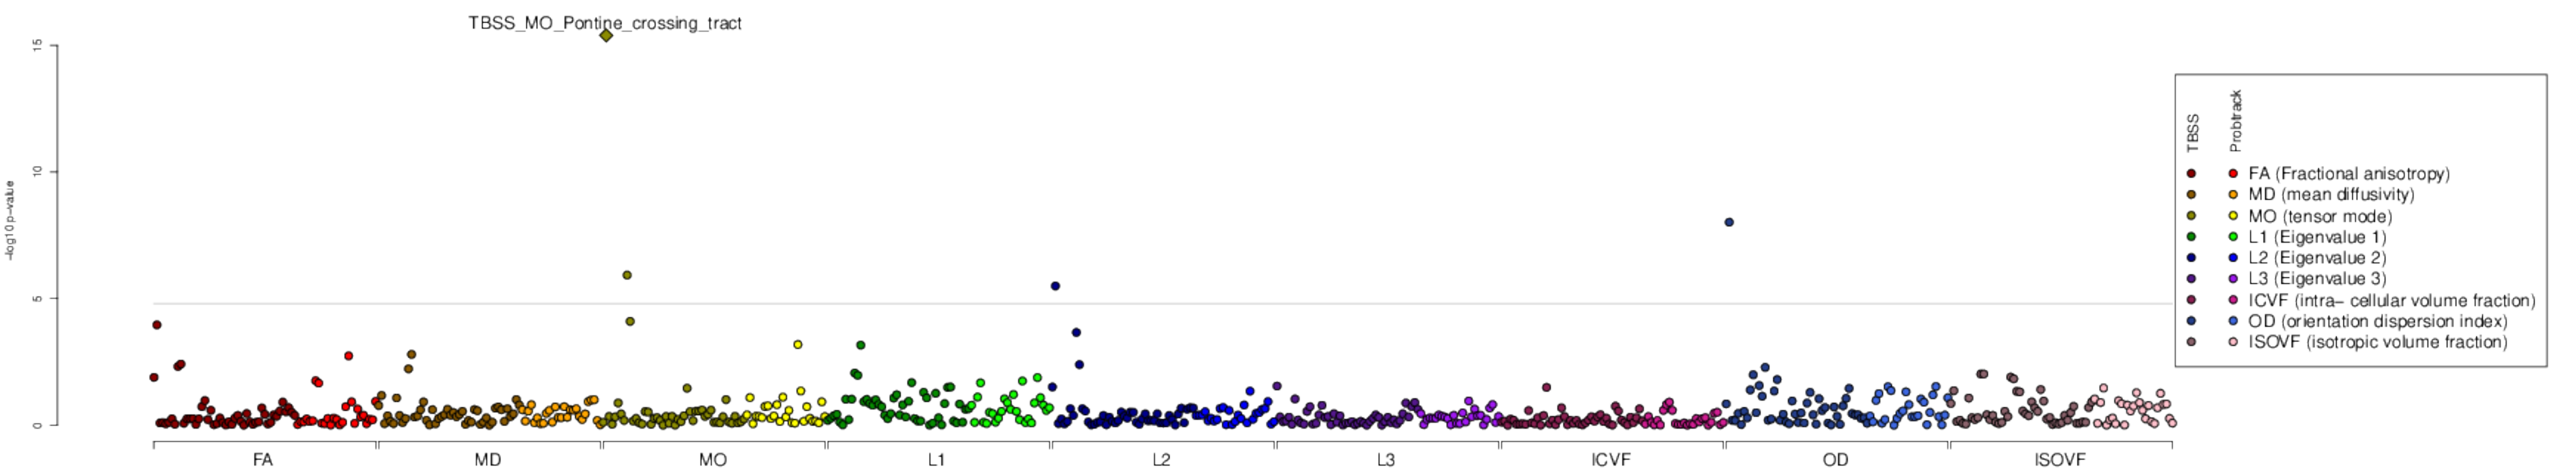

### functional MRI

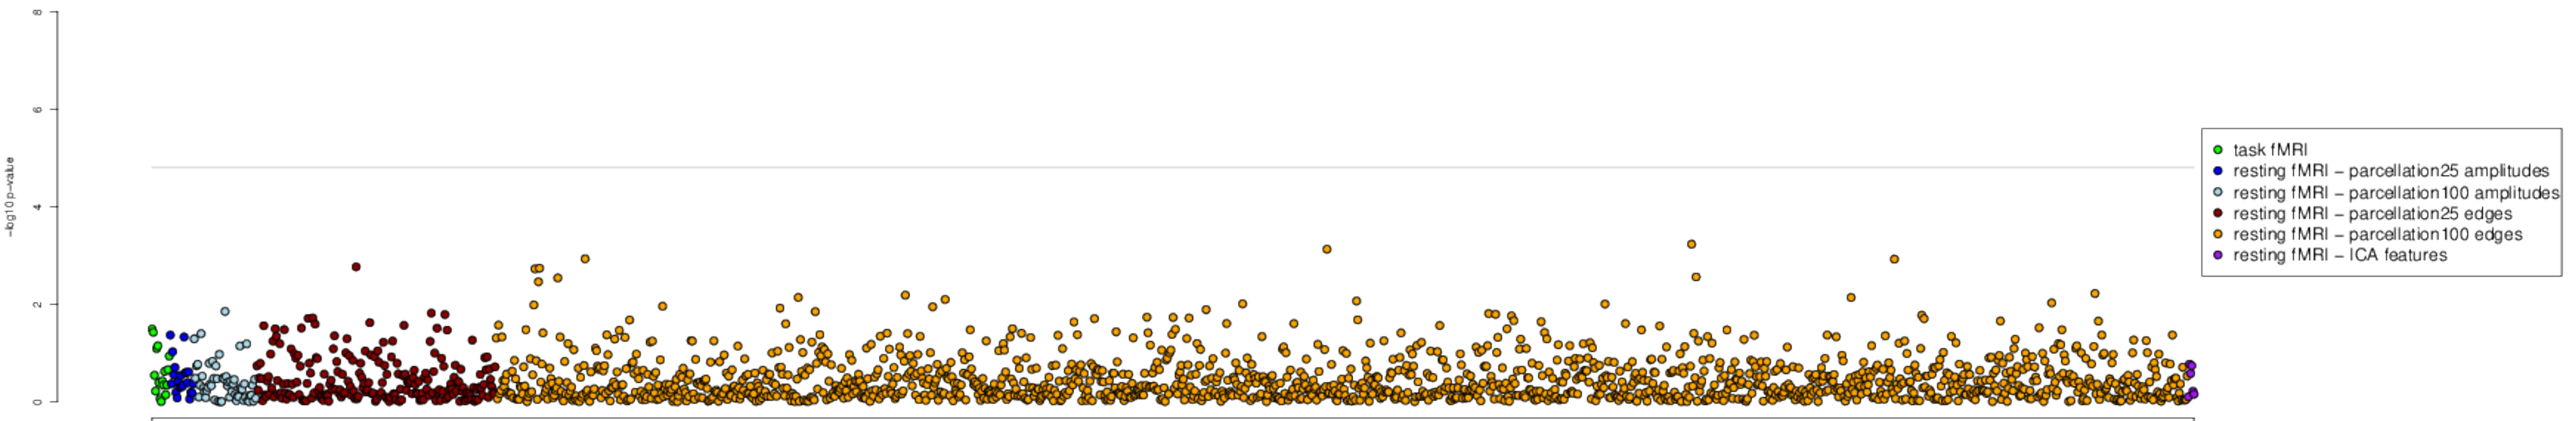

Supplement: Supplementary file [file 178806-8.pdf]
